# Supplementary material for: Genomic signatures of globally enhanced gene duplicate accumulation in the megadiverse higher Diptera fueling intralocus sexual conflict resolution
Source: PeerJ. 2020 Oct 12;8:e10012. doi: 10.7717/peerj.10012 (PMC7560327; doi:10.7717/peerj.10012)
Supplement: Supplemental Information 1 [file peerj-08-10012-s001.xlsx]

## Sheet: genes
Species			Drosophila melanogaster			Anopheles gambiae			Tribolium castaneum			Apis mellifera
#Gene_Desc	Gene_Symbol	#primary_group	duplication_history	dup_member	Entrez Gene ID	duplication_history	dup_member	Entrez Gene ID	duplication_history	dup_member	Entrez Gene ID	duplication_history	dup_member	Entrez Gene ID
Total				0
CTP:phosphocholine cytidylyltransferase 1	Cct1	1.1	(1,2);	1	117353		0	1269296	(1,2);	1	658206,658283		0	412303
phosphoethanolamine cytidylyltransferase	Pect	1.2		0	34716		0	1280227	(1,2);	1	654972,661364		0	551931
CTP:phosphocholine cytidylyltransferase 2	Cct2	1.3		2	38180		0	NA		0	NA		0	NA
v(2)k05816	v(2)k05816	2.1	(1,2);	1	117361		0	NA		0	NA		0	NA
CG3523	CG3523	2.2		2	33524		0	1280133	((1,2),3);	1	658978,662899,658024		0	412815
CG17374	CG17374	2.3		0	3355111	(1,2);	1	1281226,1277512	(1,2);	1	658944,659179		0	411959
Hex-t1	Hex-t1	3.1	(((1,2),3),4);	1	117364		0	NA		0	NA		0	NA
Hex-t2	Hex-t2	3.2		2	43191		0	NA		0	NA		0	NA
hexokinase C	Hex-C	3.3		3	44008		0	NA		0	NA		0	NA
hexokinase A	Hex-A	3.4		4	45875		0	1270715	(1,2);	1	659227,657694	(1,2);	1	551005,408818
HBS1	HBS1	4.1		0	117365		0	1273366		0	657404		0	551269
Ef1alpha-like factor	Elf	4.2		0	34658		0	1280274		0	657209		0	NA
elongation factor 1alpha48D	Ef1alpha48D	4.3		0	36271		0	1274198,1269779		0	658093,655495		0	544670,408385
elongation factor 1alpha100E	Ef1alpha100E	4.4		0	43736		0	NA		0	NA		0	NA
CG10251	CG10251	5.1		0	117368		0	4576836		0	660202		0	NA
vesicular monoamine transporter	Vmat	5.2		0	3346192		0	1274624		0	659437		0	408517
VAChT	VAChT	5.3		0	42795		0	1273594		0	664399		0	551750
desat1	desat1	6.1	((1,2),3);	1	117369		0	1281461	(1,2);	1	658103,657939		0	412166
Fad2	Fad2	6.2		3	44006		0	NA		0	NA		0	NA
desat2	desat2	6.3		2	41536		0	NA		0	NA		0	NA
CG8630	CG8630	6.4		0	41629		0	1272792	((1,2),(3,4));	1	656478,656395,657267,657416	(1,2);	1	551527,552417
CG15531	CG15531	6.5		0	43592		0	1272902		0	TC016399		0	727166
CG9743	CG9743	6.6		0	43593		0	1272905		0	656313		0	552176
CG32396	CG32396	7.1	(1,2);	1	117406		0	NA		0	NA		0	NA
beta-Tubulin at 56D	betaTub56D	7.2		0	37238		0	1271023		0	655614		0	408782
beta-Tubulin at 60D	betaTub60D	7.3		0	37888		0	1275247		0	655694		0	410994
beta-Tubulin at 85D	betaTub85D	7.4		0	41124		0	NA		0	658517	(1,2);	1	410996,410559
beta-Tubulin at 97EF	betaTub97EF	7.5		2	43359		0	1270396		0	NA		0	NA
gustatory receptor 64f	Gr64f	8.1	((1,2),3);	3	117477		0	3290786	(1,2);	1	661376,661325	(1,2);	1	727431,413684
gustatory receptor 64e	Gr64e	8.2		2	3771916		0	NA		0	NA		0	NA
Trehalose-sensitivity	Tre	8.3		1	44873		0	NA		0	NA		0	NA
RacGAP84C	RacGAP84C	9.1	(1,2);	1	117503		0	NA		0	NA		0	NA
tumbleweed	tum	9.2		2	36538		0	1279880		0	658310		0	410144
trapped in endoderm-1	Tre1	10.1		0	140439		0	1275731		0	659625		0	725008
moody	moody	10.2		0	31168		0	NT_078266!5682356!5682517		0	663118		0	409159
CG4313	CG4313	10.3		0	31169		0	1281674		0	NA		0	NA
CG30005	CG30005	11.1	(((1,2),3),4);	1	246386		0	NA		0	NA		0	NA
CG1681	CG1681	11.2		4	32299		0	NA		0	NA		0	NA
CG1702	CG1702	11.3		3	33047	(1,2);	1	1277405,1272353		0	658956		0	552314
CG30000	CG30000	11.4		2	35995		0	NA		0	NA		0	NA
CG30036	CG30036	12.1	((1,2),3);	1	246408		0	NA		0	NA		0	NA
CG30037	CG30037	12.2		2	246409		0	NA		0	NA		0	NA
CG33145	CG33145	12.3		3	36279		0	1273289		0	661600		0	552398
CG30059	CG30059	13.1	(1,2);	1	246425		0	NA		0	NA		0	NA
CG18278	CG18278	13.2		2	36487		0	1278507		0	662227		0	550869
sulfated	Sulf1	13.3		0	53437		0	1275055		0	661968		0	410233
CG30075	CG30075	14.1	(1,2);	1	246437		0	NA		0	NA		0	NA
shutdown	shu	14.2		2	45360		0	4577832	(1,2);	1	657603,657525		0	NA
CG30093	CG30093	15.1	(1,2);	1	246451		0	NA		0	NA		0	NA
levy	levy	15.2		0	37728		0	1277364		0	662858		0	726042
CG14077	CG14077	15.3		2	40066		0	1279817		0	NA		0	GB10816
CG30104	CG30104	16.1	((1,2),3);	1	246458		0	1274294		0	663694		0	410539
veil	veil	16.2		2	36968		0	NA		0	NA		0	NA
CG30103	CG30103	16.3		3	36969		0	NA		0	NA		0	NA
CG42249	CG42249	16.4		0	32043	((((1,2),(3,4)),(5,6)),(7,8));	5	1270958,3290489,1269965,1281573,5667074,1276150,1280699,3290312	(1,2);	1	TC000799,661194		0	408474
CG30108	CG30108	17.1	(1,2);	1	246460		0	NA		0	NA		0	GB19212
CG30109	CG30109	17.2		2	246461		0	1278805		0	655716		0	NA
CG30152	CG30152	18.1		0	246485		0	1269818		0	664461		0	409195
CG7949	CG7949	18.2		0	39221		0	1276121		0	655433		0	552791
CG30157	CG30157	19.1		0	246489		0	1276194		0	NA		0	726361
CG16979	CG16979	19.2		0	39687		0	1280694		0	658659		0	413447
CG30178	CG30178	20.1	(((1,2),3),4);	4	246501		0	NA		0	NA		0	NA
CG31988	CG31988	20.2		1	326182		0	NA		0	NA		0	NA
CG34325	CG34325	20.3		3	32656		0	1272345		0	NA		0	NA
paxillin	Pax	20.4		0	35215		0	1277441		0	658324		0	551919
CG31624	CG31624	20.5		2	35393		0	NA		0	NA		0	NA
CG18853	CG18853	21.1	(1,2);	1	246511		0	NA		0	NA		0	NA
photorepair	phr	21.2		2	35735		0	1274733		0	NA		0	GB13734
CG12822	CG12822	21.3		0	35737		0	1274146		0	656112		0	412107
CG30193	CG30193	22.1		0	246512		0	1270607		0	655579		0	408942
CG8331	CG8331	22.2	(1,2);	1	36569		0	1278407		0	660609		0	551678
CG4960	CG4960	22.3		2	43115		0	NA		0	NA		0	NA
CG30203	CG30203	23.1	((1,2),3);	1	246514		0	NA		0	NA		0	NA
CG17739	CG17739	23.2		3	36333		0	1280387		0	TC007203		0	413185
CG30046	CG30046	23.3		2	36334		0	NA		0	NA		0	NA
fat-spondin	fat-spondin	23.4		0	36919		0	1280875		0	664362		0	GB11054
CG30273	CG30273	24.1	(((((1,2),(3,4)),5),6),7);	3	246520		0	NA		0	NA		0	NA
CG13510	CG13510	24.2		1	37596	(((1,2),3),4);	1	5668156,5668157,1280011,4578069		0	NA		0	NA
CG42565	CG42565	24.3		2	37598		0	NA		0	NA		0	NA
CG4250	CG4250	24.4		5	37599		0	NA		0	NA		0	NA
CG30269	CG30269	24.5		4	37600		0	NA		0	TC003371		0	725688
CG13516	CG13516	24.6		6	3885599		0	NA		0	NA		0	NA
CG42566	CG42566	24.7		7	8674120		0	NA		0	NA		0	NA
CG30275	CG30275	25.1	(1,2);	1	246522		0	NA		0	655609		0	726905
CG30268	CG30268	25.2		2	37610		0	NA		0	NA		0	NA
CG30284	CG30284	26.1		0	246527		0	NA		0	NA		0	NA
CG34394	CG34394	26.2		0	33552		0	1273236+5667408		0	657554,100141873		0	411468,412099
Cht12	Cht12	27.1		0	246535	((1,2),3);	1	1275083,1280007,1276046		0	NA		0	NA
Cht9	Cht9	27.2		1	37392		0	NA		0	NA		0	NA
chitinase 2	Cht2	27.3		0	38223		0	1276319		0	658736		0	NA
chitinase 4	Cht4	27.4		2	49815		0	NA		0	NA		0	NA
Cht8	Cht8	27.5	((1,2),3);	3	37390		0	1277025	(((1,2),3),((4,5),6));	1	661428,661383,641594,641592,661689,661852	(1,2);	1	413705,GB12203
CG33960	CG33960	28.1	(1,2);	1	246538		0	NA		0	NA		0	NA
Sema-1a	Sema-1a	28.2		0	34192		0	1275507		0	660780		0	410686
Sema-2a	Sema-2a	28.3		2	36846	(1,2);	1	1277221,1277222		0	656741		0	408896
Sema-1b	Sema-1b	28.4		0	37007		0	1276412		0	656016		0	NA
Semaphorin-5c	Sema-5c	28.5		0	37066		0	1273536		0	655313		0	410589
Vha100-3	Vha100-3	29.1	((1,2),3),4);	4	246543		0	NA		0	NA		0	NA
CG12602	CG12602	29.2		3	34587		0	NA		0	NA		0	NA
CG7678	CG7678	29.3		1	42214		0	NA		0	NA		0	NA
Vha100-2	Vha100-2	29.4		2	42216	(1,2);	1	3290488,1281585		0	656997		0	412810
Vha100-1	Vha100-1	29.5		0	43442		0	1274390		0	655096		0	NA
CG30344	CG30344	30.1	((1,2),(3,4));	1	246552		0	1276027		0	NA		0	NA
CG30345	CG30345	30.2		2	246553		0	NA		0	664418		0	727496
CG8008	CG8008	30.3		3	35935		0	NA		0	NA		0	NA
CG15553	CG15553	30.4		4	43677		0	NA		0	NA		0	NA
CG30354	CG30354	31.1	(1,2);	1	246560		0	NA		0	NA		0	726316
Ubiquinol-cytochrome C reductase complex 11 kDa protein	Ucrh	31.2		2	5740185		0	1269317		0	657657		0	NA
CG30357	CG30357	32.1	(1,2);	1	246563		0	NA		0	660622		0	NA
CG12857	CG12857	32.2		2	36642		0	4578042		0	NA		0	725699
CG30379	CG30379	33.1	((1,2),3),4);	4	246578		0	NA		0	NA		0	NA
CG3814	CG3814	33.2		1	36418		0	NA		0	NA		0	NA
N-methyl-D-aspartate receptor-associated protein	Nmda1	33.3		2	36419	(1,2);	1	3289993,1276212	(1,2);	1	664126,100141804		0	408303
N-methyl-D-aspartate receptor-associated protein	Nmda1	33.4		0	36419		0	NA		0	657964		0	100121537 (Nvit)
CG9722	CG9722	33.5		3	41724		0	NA		0	NA		0	NA
CG30382	CG30382	34.1	(1,2);	1	246582		0	1278761		0	657082		0	NA
proteasome alpha7 subunit	Prosalpha7	34.2		0	36018		0	1281150		0	658496		0	408986
proteasome alpha1 subunit	Prosalpha1	34.3		2	45780		0	NA		0	NA		0	NA
CG30398	CG30398	35.1	(1,2);	1	246591		0	NA		0	NA		0	NA
CG14985	CG14985	35.2		2	38470		0	1270276		0	NA		0	724982
CG30424	CG30424	36.1	((1,2),3);	1	246606		0	NA	((1,2),3);	1	659098,657875,TC000013		0	100577693
CG12970	CG12970	36.2		2	36744		0	NA		2	NA		0	NA
CG7194	CG7194	36.3		3	38933		0	NA		3	NA		0	NA
CG30429	CG30429	37.1	(1,2);	1	246609		0	NA		0	655391		0	726857
CG14490	CG14490	37.2		2	37041		0	NA		0	NA		0	NA
tyrosine decarboxylase 1	Tdc1	38.1		0	35573		0	1269867		0	661480		0	410947
tyrosine decarboxylase 2	Tdc2	38.2		0	246620		0	1269865		0	661439		0	410948
dopa decarboxylase	Ddc	38.3		0	35190		0	1280045	(1,2);	1	662962,661884		0	410638
histidine decarboxylase	Hdc	38.4		0	36076		0	1279960		0	664593		0	408587
CG30503	CG30503	39.1	(1,2);	1	246656		0	NA		0	NA		0	NA
secretory phospholipase A2	sPLA2	39.2		2	35665		0	1271077		0	NA	(1,2);	1	406141,724436
peroxiredoxin 2540	Prx2540-1	40.1	((1,2),3);	1	246663		0	1280823		0	656825		0	551975
peroxiredoxin 6005	Prx6005	40.2		0	33493		0	1270086		0	659242		0	411852
peroxiredoxin 2540	Prx2540-2	40.3		2	36098		0	NA		0	NA		0	NA
CG12896	CG12896	40.4		3	36101		0	NA		0	NA		0	NA
forkhead domain 3F	fd3F	41.1	(1,2);	1	246673		0	NC_004818!9602604!9602774		0	TC001232		0	GB14932
circadianly regulated gene	Crg-1	41.2		2	43900		0	NA		0	NA		0	NA
Liprin-alpha	Liprin-alpha	42.1		0	249072		0	1281705		0	658901		0	GB19199
CG11206	CG11206	42.2		0	37552		0	1269967		0	658072		0	409711
CG10743	CG10743	42.3		0	39524		0	1272699		0	664568		0	411631
hoepel1	hoe1	43.1	(((1,2),3),4);	4	249663		0	1280250		0	660548		0	551871
CG31693	CG31693	43.2		1	318887		0	NA		0	NA		0	NA
hoepel2	hoe2	43.3		0	33700		0	1280249		0	NA		0	NA
CG13801	CG13801	43.4		3	38299		0	NA		0	NA		0	NA
CG11262	CG11262	43.5		2	39471		0	NA		0	NA		0	NA
fused lobes	fdl	44.1		0	250735		0	1270021	(1,2);	1	656027,659369		0	411490
hexosaminidase 2	Hexo2	44.2		0	31808		0	1268907		0	658249		0	NA
hexosaminidase 1	Hexo1	44.3		0	38528		0	1276083		0	659187		0	552416
bruno-2	bru-2	45.1	(1,2);	1	250811		0	NA		0	NA		0	NA
arrest	aret	45.2		2	34648		0	1271433		0	660275		0	NA
bruno-3	bru-3	45.3		0	39527		0	1275761		0	659679		0	410353
GlcAT-I	GlcAT-I	46.1		0	251900		0	1273161		0	663511		0	413271
GlcAT-S	GlcAT-S	46.2		0	34282		0	1275663		0	NA		0	NA
GlcAT-P	GlcAT-P	46.3		0	39262		0	1281812		0	656067		0	411457
CG31468	CG31468	47.1	(1,2);	1	251937		0	NA		0	NA		0	NA
CG10252	CG10252	47.2		2	42794		0	1281554		0	663790		0	NA
juvenile hormone epoxide hydrolase 1	Jheh1	48.1	((1,2),3);	1	251984		0	NA		0	NA		0	NA
juvenile hormone epoxide hydrolase 2	Jheh2	48.2		3	37181	(1,2);	1	3291783,1275529	(((1,2),3),4);	1	659375,659305,659446,659572		0	406152
juvenile hormone epoxide hydrolase 3	Jheh3	48.3		2	37182		0	NA		0	NA		0	NA
X11L	X11L	49.1		0	252671		0	NW_045719.1!3167647!3168246		0	NA		0	NA
X11Lbeta	X11Lbeta	49.2		0	31997		0	1271789		0	657912		0	726317+727498
nimrod B2	nimB2	50.1	(((((1,2),3),4),((5,6),7),8));	4	260645		0	NA		0	658264		0	NA
nimrod B1	nimB1	50.2		1	34813		0	NA		0	NA		0	NA
nimrod B4	nimB4	50.3		2	34814		0	NA		0	NA		0	NA
nimrod B5	nimB5	50.4		3	34815		0	NA		0	NA		0	NA
nimrod C1	nimC1	50.5		5	34816		0	NA		0	NA		0	NA
nimrod C2	nimC2	50.6		6	34818		0	NA		0	NA		0	NA
nimrod C4	nimC4	50.7		7	34824		0	NA		0	NA		0	NA
eater	eater	50.8		8	43262	((1,2),3);	1	1279170,1279171,1280329		0	657844	((1,2),3);	1	724421,725413,410621
CG31953	CG31953	51.1	(1,2);	1	261611		0	NA		0	NA		0	NA
glaikit	gkt	51.2		2	33530	(1,2);	2	1275307,4577781+NW_045790.1!1393830!1394180+4577782		0	659059		0	408668
CG31683	CG31683	52.1	(1,2);	1	261623		0	NA		0	654991		0	552091
CG18858	CG18858	52.2		2	326109		0	1279952		0	NA		0	NA
CG31495	CG31495	53.1	((1,2),3);	1	261626		0	NA		0	NA		0	NA
NEM-sensitive fusion protein 2	Nsf2	53.2		2	41694		0	NA		0	NA		0	NA
comatose	comt	53.3		3	47091		0	1268587+1269024		0	660439		0	725680
CG31469	CG31469	54.1		0	261628		0	1280230		0	NA		0	NA
primo-1	primo-1	54.2	(1,2);	1	3772179		0	1270878		0	657373		0	727300
primo-2	primo-2	54.3		2	3772427		0	NA		0	NA		0	NA
CG31352	CG31352	55.1	(1,2);	1	261629		0	1276123		0	TC012552		0	726349
unc-115	unc-115	55.2		2	41178		0	NA		0	NA		0	NA
CG32335	CG32335	56.1	(1,2);	1	261663		0	NA		0	NA		0	NA
CG9119	CG9119	56.2		2	38124		0	1270331		0	657300		0	411385
dpr9	dpr9	57.1		0	2768670		0	1269423		0	657829		0	NA
dpr8	dpr8	57.2		0	32387		0	1282038		0	662287		0	409707
dpr13	dpr13	57.3		0	3885598		0	1280143		0	659863		0	725619
dpr13	dpr13	57.4		0	3885598		0	1274136		0	659026		0	NA
dpr10	dpr10	57.5	(1,2);	1	39180		0	NA		0	NA		0	NA
dpr6	dpr6	57.6		2	50296		0	NA		0	656908		0	409000
dpr12	dpr12	57.7		0	50320		0	1276929		0	NA		0	725460
CG42596	CG42596	57.8		0	8674044		0	1280200		0	654938		0	NA
p38c	p38c	58.1	((1,2),3);	3	2768679		0	NA		0	NA		0	NA
CG32703	CG32703	58.2		0	31877		0	NA		0	662230		0	408917
rolled	rl	58.3		0	3354888		0	1280167		0	655225		0	409523
p38b	p38b	58.4		1	34780		0	NW_045840.1!3474294!3474623		0	TC013594		0	411915
nemo	nmo	58.5		0	38890		0	1276565		0	659674		0	410956
Mpk2	Mpk2	58.6		2	42866		0	NA		0	NA		0	NA
basket	bsk	58.7		0	44801	(1,2);	1	1271440,1269260		0	663836		0	409286
cardioacceleratory peptide receptor	CcapR	59.1		0	2768688	(1,2);	1	1281162,1281161	(1,2);	1	658661,657291		0	726935
cardioacceleratory peptide receptor	CcapR	59.2		0	2768688		0	NA		0	655724		0	100115490(Nvit)
Gonadotropin-releasing hormone receptor	GRHR	59.3		0	33942		0	1269400		0	655141		0	551388
Gonadotropin-releasing hormone receptor	GRHR	59.4		0	33942		0	1281645		0	660222		0	NA
ionotropic receptor 41a	Ir41a	60.1	(1,2);	1	2768714	(1,2);	1	1273056,1275614		0	TC010075		0	GB13537
Ir76a	Ir76a	60.2		2	40157		2	NA		0	NA		0	NA
CG33474	CG33474	61.1	(1,2);	1	2768725		0	NA		0	NA		0	NA
CG13827	CG13827	61.2		2	42751		0	1273755		0	661997		0	GB13564
defective proboscis extension response	dpr	62.1		0	2768858	(1,2);	1	1274750,1274751		0	662052		0	GB16778
dpr7	dpr7	62.2		0	2768865		0	1281967		0	662036	(1,2);	1	724734,410439
dpr4	dpr4	62.3		0	3346160		0	1281931		0	662575		0	NW_001262669!1780!1899
dpr3	dpr3	62.4	(1,2);	1	3346208		0	1278206		0	NA		0	NA
dpr2	dpr2	62.5		2	3346227		0	NA		0	NA		0	NA
dpr5	dpr5	62.6		0	41381		0	1281927		0	NA		0	NA
Sperm-specific dynein intermediate chain 2	Sdic2	63.1	((((1,2),3),4),5);	1	2768883		0	NA		0	NA		0	NA
Sperm-specific dynein intermediate chain 4	Sdic4	63.2		3	2768886		0	NA		0	NA		0	NA
Sperm-specific dynein intermediate chain 3	Sdic3	63.3		4	318231		0	NA		0	NA		0	NA
Sperm-specific dynein intermediate chain 1	Sdic1	63.4		2	43984		0	NA		0	NA		0	NA
short wing	sw	63.5		5	44160		0	1271943		0	657386		0	413409
CG33253	CG33253	64.1	((1,2),3);	1	2768889		0	1275027	(1,2);	1	660364,660423		0	551688
Mec2	Mec2	64.2		2	32905		0	NA		0	NA		0	NA
CG2970	CG2970	64.3		0	37807		0	1269237		0	662412		0	412323
CG42540	CG42540	64.4		0	38562		0	1275086		0	658494		0	727311
CG14644	CG14644	64.5		3	40536		0	NA		0	NA		0	NA
CG33275	CG33275	65.1		0	2768948		0	1276854		0	656506		0	410718
CG30440	CG30440	65.2		0	35496		0	4576783		0	656568		0	409217
trio	trio	65.3		0	43974		0	1276778		0	656836		0	GB12436
CG7369	CG7369	66.1	(1,2);	1	2768961		0	NA		0	658190		0	412801
CG4853	CG4853	66.2		2	36974		0	NA		0	NA		0	NA
CG6244	CG6244	67.1	(1,2);	1	2768962		0	NA		0	NA		0	NA
CG40228	CG40228	67.2		2	5740664		0	1274384		0	660069		0	725072
Rpn12R	Rpn12R	68.1	(1,2);	1	2768973		0	NA		0	NA		0	NA
Rpn12	Rpn12	68.2		2	39845		0	1273362		0	660653		0	552838
CG33262	CG33262	69.1	((1,2),(3,4));	1	2768975		0	NA		0	NA		0	NA
CG14720	CG14720	69.2		2	41415		0	NA		0	NA		0	NA
CG34429	CG34429	69.3		3	5740606		0	NA		0	NA		0	726382
CG34428	CG34428	69.4		4	5740867		0	4577283	(1,2);	1	662568,662534		0	NA
CG32318	CG32318	70.1	(1,2);	1	2768976		0	NA		0	NA		0	NA
Psf1	Psf1	70.2		2	38136		0	1271127		0	656137		0	412072
CG33290	CG33290	71.1	(1,2);	1	2768993		0	NA		0	NA		0	NA
CG14567	CG14567	71.2		2	40420		0	NA		0	660215		0	726803
zormin	zormin	72.1		0	2769001		0	1269670		0	660472		0	551259
sallimus	sls	72.2		0	44013		0	1269667		0	660533		0	552504
CG42330	CG42330	73.1		0	2769008		0	1270011		0	661648		0	GB17097
down syndrome cell adhesion molecule	Dscam	73.2		0	35652		0	1271065		0	652946		0	408786
CG42256	CG42256	73.3		0	38788		0	1275709		0	656006		0	409817
Dscam3	Dscam3	73.4		0	42103		0	1274926		0	656717		0	412855
achaete	ac	74.1	((1,2),3);	1	30981		0	NA		0	NA		0	NA
scute	sc	74.2		2	30982		0	1277392		0	NA		0	NA
lethal of scute	l(1)sc	74.3		3	30983		0	NA		0	652954		0	724458
asense	ase	74.4		0	30985		0	5666740		0	652936		0	NA
cytochrome P450-4g1	Cyp4g1	75.1		0	30986		0	NA		0	NA		0	NA
Cyp4g15	Cyp4g15	75.2		0	32093		0	1274154,1277393		0	659431,662217		0	409469
CG3156	CG3156	76.1		0	30994		0	1273250		0	655121		0	552744
CG1824	CG1824	76.2		0	32208		0	1276927		0	660837		0	552433
silver	svr	77.1		0	30998		0	1273549		0	655207		0	724816
CG4678	CG4678	77.2		0	32652		0	1272346	(1,2);	1	TC005500,100142054		0	GB13958
ventral nervous system defective	vnd	78.1		0	31003	(1,2);	1	3291475,5667880		0	656094		0	725671
scarecrow	scro	78.2		0	3355151		0	NT_078266!49631079!49631288		0	662616		0	411104
tinman	tin	78.3		0	42536		0	3290880		0	NA		0	NA
bagpipe	bap	78.4		0	42537		0	1274346		0	663892		0	724373
CG13369	CG13369	79.1	(1,2);	1	31007		0	1273360		0	662716		0	551282
CG17010	CG17010	79.2		2	34650		0	NA		0	NA		0	NA
Roc1a	Roc1a	80.1	(1,2);	1	31014		0	1274908		0	655935		0	408691
Roc2	Roc2	80.2		0	36246		0	1276246		0	TC000384		0	724184
Roc1b	Roc1b	80.3		2	53445		0	NA		0	NA		0	NA
skpA	skpA	81.1	((1,2),3);	2	31016		0	1275570		0	663380		0	409234
skpB	skpB	81.2		3	36298		0	NA		0	NA		0	NA
skpF	skpF	81.3		1	37713		0	NA		0	NA		0	NA
CG5254	CG5254	82.1	(1,2);	1	31020		0	1273026		0	664488		0	NA
CG9582	CG9582	82.2		2	34230		0	NA		0	NA		0	NA
ribosomal protein L22	RpL22	83.1	(1,2);	1	31022		0	1274727		0	NA		0	552632
ribosomal protein L22-like	RpL22-like	83.2		2	37684		0	NA		0	662302		0	NA
protein O-mannosyltransferase 2	tw	84.1		0	31024		0	1273287		0	662234		0	551578
CG11999	CG11999	84.2		0	40637		0	1281425		0	655487		0	551844
mediator complex subunit 22	MED22	85.1	(1,2);	1	31038		0	1274026		0	659964		0	410973
CG32971	CG32971	85.2		2	318271		0	NA		0	NA		0	NA
CG3699	CG3699	86.1	(((1,2),3),4);	4	31046		0	NA		0	NA		0	NA
CG10672	CG10672	86.2		0	38598		0	1269748	(1,2);	1	659077,658998	(1,2);	1	552390,412304
CG31549	CG31549	86.3		1	40689		0	NA		0	NA		0	NA
CG12171	CG12171	86.4		2	40690		0	NA		0	NA		0	NA
CG31546	CG31546	86.5		3	40691		0	NA		0	NA		0	NA
CG12068	CG12068	86.6		0	43512		0	1277398		0	661894		0	724348
CG3603	CG3603	86.7		0	31289		0	1279007		0	TC011405		0	552493
CG31548	CG31548	86.8		0	318794	(1,2);	1	1273441,1273440		0	662954		0	411417
CG7322	CG7322	86.9		0	32880		0	1277469	(((1,2),3),(4,5));	4	660841,660788,660733,659735,659664		0	413567
CG3690	CG3690	87.1	((1,2),3);	1	31047		0	NA		0	NA	(1,2);	1	410705,411186
CG31272	CG31272	87.2		3	326130		0	1273135+5667622	(((((1,2),3),4),(5,6)),7);	4	662324,100142577,100141677,100141966,100142436,100142372,100142173		2	NA
CG14691	CG14691	87.3		2	41287		0	NA		0	NA		0	NA
TfIIA-S-2	TfIIA-S-2	88.1	(1,2);	1	31048		0	NA		0	NA		0	NA
Transcription-factor-IIA-S	TfIIA-S	88.2		2	42822		0	1274516		0	659400		0	550665
CG9917	CG9917	89.1	((1,2),3);	3	32596	((1,2),(3,4));	1	1269564,1269562,1269866,1276930	((1,2),3);	3	663912,656540,100142013		0	GB16008
CG14629	CG14629	89.2		1	31055		0	NA		1	NA		0	NA
CG11378	CG11378	89.3		2	31060		0	NA		2	NA		0	NA
CG3655	CG3655	90.1		0	31056		0	1281308	((1,2),3);	0	659018,659180,659249,100141739		0	413620
CG11384	CG11384	90.2	(1,2);	1	31061		0	NA		3	NA		0	725651
CG12715	CG12715	90.3		2	32252		0	NA		0	NA		0	NA
CG14628	CG14628	91.1	((1,2),3);	1	31057		0	NA		0	NA		0	NA
neosin	Neos	91.2		3	38795		0	1269540		0	658386		0	551309
CG18823	CG18823	91.3		2	59184		0	NA		0	NA		0	NA
CG3638	CG3638	92.1		0	31071		0	1273038		0	NA		0	NA
tweety	tty	92.2		0	33109		0	1277373		0	657663		0	413358
CG11403	CG11403	93.1		0	31072		0	1281639		0	664442		0	GB15151
CG4078	CG4078	93.2		0	31497		0	1272449		0	663916		0	412546
CG4078	CG4078	93.3		0	31497		0	NA		0	663928		0	411185
xeroderma pigmentosum D	Xpd	93.4		0	37414		0	1272969		0	659447		0	412700
CG11412	CG11412	94.1	(1,2);	1	31079		0	1278741		0	664218		0	552341
CG32319	CG32319	94.2		2	317976		0	NA		0	NA		0	NA
CG11418	CG11418	95.1		0	31081		0	1279775		0	663371		0	551561
wispy	wisp	95.2	(1,2);	1	32152		0	NA		0	NA		0	NA
Gld2	Gld2	95.3		2	42602		0	1282036		0	662532		0	409838
embryonic lethal abnormal vision	elav	96.1		0	31000		0	NA		0	NA		0	NA
found in neurons	fne	96.2		0	32245		0	1279370,1270460,NW_045841.1!3968745!3969527		0	659897		0	410689
RNA-binding protein 9	Rbp9	96.3		0	33498		0	NA		0	NA		0	NA
alan shepard	shep	96.4	((1,2),3);	3	38605		0	1276638		0	663083		0	409893
CG3056	CG3056	96.5		1	31086		0	NA		0	NA		0	NA
CG5213	CG5213	96.6		2	41892		0	NA		0	NA		0	NA
nucleostemin 3	ns3	97.1		0	31097		0	1278372		0	657331		0	551834
nucleostemin 4	ns4	97.2		0	35338		0	1277654		0	662290		0	412985
CG14777	CG14777	98.1	(1,2);	1	31099		0	NA		0	NA		0	NA
CG14778	CG14778	98.2		2	31100		0	1279498		0	TC011649		0	724427
CG2022	CG2022	98.3		0	40615		0	1270888		0	NA		0	NA
phosphoglycerate mutase 5	Pgam5	99.1	(1,2);	1	31143		0	1273427		0	660487	(1,2);	1	551178,412666
CG15874	CG15874	99.2		2	37899		0	NA		0	NA		2	NA
G9a	G9a	100.1		0	30971		0	1272941		0	661193		0	413388
pr-set7	pr-set7	100.2		0	41743		0	1274161		0	657891		0	412027
Mes-4	Mes-4	100.3		0	43351		0	1277307		0	662527		0	552057
trithorax-related	trr	100.4		0	31149		0	1270733		0	TC000606		0	409844
Set2	Set2	100.5		0	32301		0	4577900		0	NA		0	GB10605
CG40351	CG40351	100.6		0	3354971		0	1269315		0	657811		0	411985
enhancer of zeste	E(z)	100.7		0	39203		0	1268848		0	659759		0	552235
absent, small, or homeotic discs 1	ash1	100.8		0	40133		0	1281642		0	660094		0	727238
CG4565	CG4565	100.9		0	41303		0	NA		0	NC_007417!16672538!16673044		0	725066
trithorax	trx	100.10		0	41737		0	1273224		0	658843		0	408716
Edem1	Edem1	101.1		0	31154		0	4578501		0	661836		0	726952
Edem2	Edem2	101.2		0	34714		0	1275602		0	660189		0	552435
CG4199	CG4199	102.1	(1,2);	1	31174		0	NW_001953041.1!3118265!3119155+1269496		0	657351		0	413958
CG10700	CG10700	102.2		2	35183		0	NA		0	NA		0	NA
CG16903	CG16903	103.1		0	31178		0	1281497		0	659021		0	552474
cyclin K	CycK	103.2		0	49816		0	1277948		0	661360		0	411062
polyhomeotic proximal	ph-p	104.1	(1,2);	1	31181		0	4577267		0	655591		0	NA
SAM-motif ubiquitously expressed punctatedly localized protein	Samuel	104.2		0	34530		0	1279575		0	TC006717		0	NA
polyhomeotic distal	ph-d	104.3		2	44889		0	NA		0	NA		0	726198
CG3630	CG3630	105.1	(1,2);	1	31189		0	1281661		0	659140		0	410370
CG2113	CG2113	105.2		2	38356		0	NA		0	NA		0	NA
CG3621	CG3621	106.1	(1,2);	1	31190		0	1268745		0	664057		0	NA
CG6914	CG6914	106.2		2	40477		0	NA		0	NA		0	724264
monocarboxylate transporter 1	Mct1	107.1		0	31198		0	1272237		0	658127,658744		0	NA
CG3409	CG3409	107.2		0	35578		0	1276095,1281333		0	658598		0	GB19547,410067
CG8468	CG8468	107.3		0	36577		0	1273879		0	657632		0	411065
CG12866	CG12866	107.4		0	36630		0	NA		0	NA		0	NA
CG13907	CG13907	107.5		0	38104		0	1273881		0	662983		0	725015
msta	msta	108.1	(1,2);	1	31200		0	3289599		0	656351		0	726471
CG12119	CG12119	108.2		2	31859		0	NA		0	NA		0	NA
CG3191	CG3191	109.1	((1,2),3);	1	31209		0	NA		0	NA		0	NA
CG3091	CG3091	109.2		2	31210		0	NA		0	NA		0	NA
CG3823	CG3823	109.3		3	31573		0	1273125		0	657947		0	NA
CG2924	CG2924	110.1		0	31214		0	1281721		0	TC030776		0	409607
CG4502	CG4502	110.2		0	34002		0	1275437		0	661636		0	412360
CG2854	CG2854	111.1	(1,2);	1	31219		0	NA		0	NA		0	NA
CG13295	CG13295	111.2		2	38692		0	1280089		0	100142438		0	412457
pole hole	phl	112.1		0	31221		0	1278538		0	655334		0	413448
kinase suppressor of ras	ksr	112.2		0	40660		0	1281691		0	661985		0	409498
giant	gt	113.1	(1,2);	1	31227		0	1281243		0	641612		0	725191
CG4575	CG4575	113.2		2	31637		0	NA		0	NA		0	NA
brother of iHog	boi	114.1	(1,2);	1	31229		0	1281072		0	664554		0	409942
interference hedgehog	iHog	114.2		2	33972		0	NA		0	NA		0	NA
CG8310	CG8310	115.1	(1,2);	1	31235		0	NA		0	NA		0	NA
CG13167	CG13167	115.2		0	36328		0	NA		0	661586		0	NA
Vha36	Vha36	115.3		2	44702		0	1278594		0	660332		0	411295
CG13759	CG13759	116.1		0	31236		0	1270761		0	661630		0	411294
dopamine N acetyltransferase	Dat	116.2		0	37867		0	1279562		0	664229		0	409361
CG8636	CG8636	117.1	(1,2);	1	31243		0	1269559		0	TC012449		0	408386
CG10881	CG10881	117.2		2	42422		0	NA		0	NA		0	NA
tetraspanin 3A	Tsp3A	118.1	(1,2);	1	31244		0	1269304		0	655151		0	725505
tetraspanin 26A	Tsp26A	118.2		2	33838		0	NA		0	661579		0	551898
tetraspanin 86D	Tsp86D	118.3		0	41310		0	NA		0	NA		0	NA
CG10260	CG10260	119.1		0	31247		0	4577816		0	658290		0	551182
phosphotidylinositol 3 kinase 59F	Pi3K59F	119.2		0	37733		0	1279696		0	656409		0	725770
four wheel drive	fwd	119.3		0	45374		0	1269716		0	661577		0	408373
shaggy	sgg	120.1	((1,2),3);	3	31248		0	1274587		0	664299		0	408976
gasket	gskt	120.2		1	318552		0	NA		0	NA		0	NA
Pk34A	Pk34A	120.3		2	34705		0	NA		0	NA		0	NA
helix loop helix protein 3B	HLH3B	121.1		0	31249		0	3291000		0	NA		0	NA
helix loop helix protein 4C	HLH4C	121.2		0	31397		0	1275714		0	NA		0	726553
CG15739	CG15739	122.1	((1,2),3);	1	32146	(((1,2),3),4);	1	1279406,1276646,1272177,1279429	((1,2),3);	1	661964,661921,662004		0	551405
CG10352	CG10352	122.2		2	32147		0	NA		3	NA		0	NA
CG2680	CG2680	122.3		3	31257		0	NA		2	NA		0	NA
CG14814	CG14814	123.1	((1,2)3,);	3	31139		0	NA		0	TC012902		0	726356
CG2694	CG2694	123.2		1	31260		0	NA		0	NA		0	NA
CG11322	CG11322	123.3		2	33949		0	NA		0	NA		0	NA
tiny tim 50	ttm50	124.1	((1,2),3);	1	31266		0	1282055		0	661897		0	408569
tiny tim 3	ttm3	124.2		2	35437		0	NA		0	NA		0	NA
tiny tim 2	ttm2	124.3		3	38049		0	NA		0	NA		0	NA
CG12498	CG12498	125.1	(1,2);	1	31272		0	NA		0	NA		0	NA
Rtf1	Rtf1	125.2		2	37554		0	1280610		0	656475		0	725696
roughest	rst	126.1	(1,2);	1	31290		0	NA		0	NA		0	NA
kin of irre	kirre	126.2		2	31292	(1,2);	1	1272050,1272049		0	664188		0	410853
CG3939	CG3939	127.1		0	31295		0	1273848		0	NA		0	NA
clot	cl	127.2		0	43938		0	1279147		0	655484		0	412420
CG10793	CG10793	128.1		0	31308		0	1278830		0	TC009993		0	551788
vacuolar protein sorting 4	Vps4	128.2		0	32777		0	1271692		0	656502		0	409756
katanin p60-like 1	kat-60L1	128.3		0	40715		0	NW_001953040.1!2556992!2557465		0	NA		0	NA
katanin 60	katanin-60	128.4		0	53566		0	1281382		0	100142431		0	413966
dunce	dnc	129.1		0	31309		0	1272025		0	TC012593		0	411288
phosphodiesterase 1c	Pde1c	129.2		0	34594		0	1279930		0	NA		0	724389
phosphodiesterase 8	Pde8	129.3		0	37741		0	1269950		0	657274		0	408699
CG16781	CG16781	130.1	((1,2),3);	3	31315		0	NA		0	NA		0	NA
CG9855	CG9855	130.2		1	40556		0	1270534		0	663760		0	552063
CG17991	CG17991	130.3		2	43279		0	NA		0	NA		0	NA
CG12206	CG12206	131.1	(1,2);	1	31316		0	NA		0	NA		0	NA
CG31559	CG31559	131.2		2	40749		0	1271994		0	658863		0	411159
CG10804	CG10804	132.1		0	31317		0	1272428		0	657475		0	411199
CG5226	CG5226	132.2		0	37129		0	1270651		0	662741		0	409142
CG32791	CG32791	133.1		0	31322		0	NA		0	661124		0	NA
CG14521	CG14521	133.2		0	43417		0	1273907	(1,2);	1	657944,657701		0	NA
CG2901	CG2901	134.1	((1,2),3);	1	31338		0	NA		0	NA		0	NA
CG7536	CG7536	134.2		3	32786		0	1272431		0	100142189		0	551795
CG10481	CG10481	134.3		2	35273		0	NA		0	NA		0	NA
CG10483	CG10483	134.4		0	38666		0	1276240		0	658194		0	NA
yin	yin	135.1	((1,2),3);	1	31340		0	NA		0	NA		0	NA
CG2930	CG2930	135.2		2	31341	(1,2);	1	1272661,1280528	(((1,2),3),4);	1	661201,661253,661143,100142504		0	725069
CG9444	CG9444	135.3		3	41175		0	NA		0	NA		0	NA
VhaAC39	VhaAC39	136.1		0	31342		0	1272314,NW_045763.1!3603374!3604417		0	663777		0	409946
CG4624	CG4624	136.2		0	42739		0	NA		0	NA		0	NA
CG42541	CG42541	137.1		0	31344		0	NA		0	NA		0	409903
Rgk2	Rgk2	137.2		0	37132		0	1269613		0	659254		0	411209
Rgk1	Rgk1	137.3		0	37219		0	1269547		0	664242		0	412261
Rgk3	Rgk3	137.4		0	5740446		0	1274950		0	657249		0	408913
CG6428	CG6428	138.1	(1,2);	1	31351		0	1273565	(1,2);	1	661275,659399		0	551548
CG8526	CG8526	138.2		2	41208		0	NA		0	NA		0	NA
CG6379	CG6379	139.1		0	31355		0	1277337		0	655843		0	411249
adrift	aft	139.2		0	37034		0	1276114		0	658920		0	413775
CG3038	CG3038	140.1		0	30970		0	1281101		0	659776		0	725341
brainiac	brn	140.2		0	31358		0	1281158		0	661418		0	NA
CG11357	CG11357	140.3		0	38561		0	5667226	((1,2),3);	1	660959,658417,658348		0	GB14082
no receptor potential A	norpA	141.1		0	31376		0	1281188		0	659062	(1,2);	1	408996,551139
small wing	sl	141.2		0	32601		0	1270776		0	TC004220		0	551709
phospholipase C at 21C	Plc21C	141.3		0	33204		0	1280066		0	662602		0	GB16555
ruby	rb	142.1		0	31381		0	NW_045730.1!228848!229675+NW_045730.1!230049!232061		0	659173		0	552064
beta adaptin	Bap	142.2		0	32987		0	1281911+NT_078266!2129775!2130695		0	661643		0	GB16141
CHOp24	CHOp24	143.1	(1,2);	1	31382		0	1278482		0	660605		0	552602
CG9308	CG9308	143.2		2	37507		0	NA		0	NA		0	NA
CG15912	CG15912	144.1	(1,2);	1	31385		0	NA		0	NA		0	NA
rhythmically expressed gene 2	Reg-2	144.2		2	38075	(1,2);	1	1275766,NW_045720.1!1196143!1196979		0	660224		0	726955
CG11444	CG11444	145.1	(1,2);	1	31388		0	NA		0	NA		0	NA
CG4438	CG4438	145.2		2	34257		0	1268647		0	657739		0	724487
CG12684	CG12684	146.1	(1,2);	1	31390		0	NA		0	NA		0	NA
CG15708	CG15708	146.2		2	36805		0	5667505		0	TC003077		0	NA
CG12184	CG12184	147.1	(1,2);	1	31392		0	NA		0	NA		0	NA
CG12179	CG12179	147.2		2	31393		0	NA		0	TC012053		0	GB19638
CG3009	CG3009	148.1		0	31402		0	1278497		0	655133		0	409277
GIIIspla2	GIIIspla2	148.2		0	31747		0	1271189		0	NA		0	GB15330
CG42237	CG42237	148.3		0	32261		0	1277416	(((1,2),3),4);	1	659722,659784,NC_007420!12026743!12027090,660128		0	409307
cut up	ctp	149.1		0	31405		0	1281844		0	657733,TC015764		0	NA
cytoplasmic dynein light chain 2	Cdlc2	149.2		0	33319		0	NA		0	NA		0	725312
CG8407	CG8407	149.3		0	36303		0	1270194		0	655564		0	726634,724529
lethal (1) G0334	l(1)G0334	150.1	(1,2);	1	31406	((1,2),3);	1	1278437,5667370,1272922	(1,2);	1	655038,663379		0	551103
CG7024	CG7024	150.2		2	31407		0	NA		2	NA		0	NA
CG8199	CG8199	150.3		0	41149		0	1273808		0	660327		0	412548
proctolin receptor	Proc-R	151.1		0	31408		0	NA		0	TC003492		0	NA
CG33696	CG33696	151.2		0	39127		0	1275825,3289882		0	TC030552		0	726516
CG6927	CG6927	152.1	((1,2),3);	1	31419		0	NW_001953046.1!2926232!2926564+NW_001953046.1!2926629!2926787+NW_001953046.1!2926852!2927109	((1,2),3);	1	663460,663445,663425		0	412830
CG7589	CG7589	152.2		2	39949		0	NA		0	NA		0	NA
CG11340	CG11340	152.3		3	43703		0	NA		0	NA		0	NA
protein tyrosine phosphatase 4E	Ptp4E	153.1	(1,2);	1	31425		0	NA		0	NA		0	NA
protein tyrosine phosphatase 10D	Ptp10D	153.2		2	32115		0	1274091		0	663785		0	GB18351
CG7180	CG7180	153.3		0	35091		0	1277872		0	662019		0	412960
CG6789	CG6789	154.1	(1,2);	1	31433		0	NA		0	NA		0	NA
CG13349	CG13349	154.2		2	36545		0	1278467		0	656614		0	413299
CG15786	CG15786	155.1		0	31438		0	1271990		0	660010		0	GB17094
CG41284	CG41284	155.2	(1,2);	1	5740851		0	NA		0	NA		0	NA
CG42598	CG42598	155.3		2	8674042		0	1281471		0	661801		0	725682
thioredoxin T	TrxT	156.1	(((1,2),3),4);	1	31443		0	NA		0	NA		0	NA
deadhead	dhd	156.2		2	31444		0	NA		0	NA		0	NA
thioredoxin-2	Trx-2	156.3		4	34281		0	1278949		0	656356		0	409451
Thioredoxin-like	Txl	156.4		0	38646		0	1276155		0	663358		0	550734
CG13473	CG13473	156.5		3	39603		0	NA		0	NA		0	NA
minichromosome maintenance 3	Mcm3	157.1		0	31449		0	1282031		0	657061		0	552642
minichromosome maintenance 6	Mcm6	157.2		0	31603		0	1279642		0	658099		0	413064
disc proliferation abnormal	dpa	157.3		0	35679		0	1275768		0	662486		0	552291
minichromosome maintenance 7	Mcm7	157.4		0	39014		0	1276468		0	655767		0	409979
minichromosome maintenance 2	Mcm2	157.5		0	40973		0	1274119		0	659225		0	411640
minichromosome maintenance 5	Mcm5	157.6		0	41296		0	1274553		0	663668		0	551903
CG16756	CG16756	158.1	((1,2),3);	3	31460		0	NA		0	NA		0	NA
CG16799	CG16799	158.2		1	37340		0	NA		0	100142316		0	NA
CG11159	CG11159	158.3		2	37341	(1,2);	1	1269798,1269796		0	NA	(1,2);	1	725110,724899
Sex peptide receptor	SPR	159.1		0	31463		0	1280457		0	664155		0	NA
CG13229	CG13229	159.2		0	36168		0	1275135	(1,2);	1	658319,658994		0	413527
dromyosuppressin receptor 2	DmsR-2	159.3	(1,2);	1	38296		0	1274937		0	657992		0	724225
dromyosuppressin receptor 1	DmsR-1	159.4		2	38298		0	NA		0	NA		0	NA
Vsx2	Vsx2	160.1	(1,2);	1	31469		0	NA		0	655933		0	411315
Vsx1	Vsx1	160.2		2	31470		0	NA		0	NA		0	NA
myosin light chain cytoplasmic	Mlc-c	161.1	(1,2);	1	31474		0	1278154		0	662551		0	551149
CG17237	CG17237	161.2		2	33411		0	NA		0	NA		0	NA
calmodulin	Cam	161.3		0	36329		0	1271007		0	660864		0	551859
CG17272	CG17272	161.4		0	42465		0	1275902		0	658207		0	410610
androcam	And	161.5		0	44913		0	1277208		0	659938		0	552209
Ecdysone-induced protein 63F 1	Eip63F-1	161.6		0	47878		0	1276079		0	657988		0	NA
CG4096	CG4096	162.1		0	31490		0	1282050		0	TC001014		0	412888
CG4096	CG4096	162.2		0	31490		0	NA		0	TC000558		0	412887
CG6232	CG6232	162.3		0	34435		0	1279428+1279430		0	662094		0	408579
CG31619	CG31619	162.4		0	35424		0	1278170		0	663866		0	410696
papilin	Ppn	162.5		0	43872		0	NW_045841.1!7858632!7860110+NW_045841.1!7862083!7863480+NW_045841.1!7863558!7863755		0	TC010195		0	413021
CG32758	CG32758	163.1		0	31493		0	1282053		0	655422		0	408945
prosap	Prosap	163.2		0	50225		0	1272635		0	658349		0	726461
CG3097	CG3097	164.1	((1,2),3);	1	31503		0	NA		0	NA		0	NA
CG42264	CG42264	164.2		2	31504		0	NA		0	NA		0	NA
CG3108	CG3108	164.3		3	31506		0	1271681		0	662236		0	726391
CG3108	CG3108	164.4		0	31506		0	NA		0	662200		0	410452
proteasome beta2R1 subunit	Prosbeta2R1	165.1	((1,2),3);	1	31511		0	NA		0	NA		0	NA
proteasome beta2 subunit	Prosbeta2	165.2		3	39628		0	1278270		0	659619		0	408353
proteasome beta2R2 subunit	Prosbeta2R2	165.3		2	40621		0	NA		0	NA		0	NA
CG12729	CG12729	166.1	(1,2);	1	31515		0	NA		0	NA		0	NA
CG8979	CG8979	166.2		2	36277		0	1269770		0	TC007686		0	409668
actin 5C	Act5C	167.1	(((1,2),3),(4,5));	1	31521		0	1272407		0	659219		0	406122
Actin-related protein 66B	Arp66B	167.2		0	38898		0	1274786		0	662601		0	410115
actin 79B	Act79B	167.3		4	40444		0	NA		0	NA		0	NA
Actin-related protein 87C	Arp87C	167.4		0	41566		0	1281358		0	658336		0	551438
actin 88F	Act88F	167.5		5	41885		0	1275974		0	NA		0	NA
actin 87E	Act87E	167.6		0	48632		0	NA		0	656991		0	551369
Actin-related protein 14D	Arp14D	167.7		0	32623		0	1270482		0	660637		0	409313
actin 42A	Act42A	167.8		2	35526		0	NA		0	NA		0	NA
Actin-related protein 53D	Arp53D	167.9		3	36879		0	NA		0	NA		0	NA
brahma associated protein 55kD	Bap55	167.10		0	36956		0	1275530		0	660806		0	552824
brahma associated protein 55kD	Bap55	167.11		0	36956		0	NA		0	659615		0	551914
actin 57B	Act57B	167.12		0	37368		0	1274770		0	NA		0	NA
CG4766	CG4766	168.1		0	31533		0	NA		0	NA		0	NA
mab-21	mab-21	168.2		0	44127		0	3289814		0	661084,661027		0	550922,550677
CG4666	CG4666	169.1		0	31541		0	3290852		0	657685		0	552211
CG4660	CG4660	169.2		0	31542		0	1269877		0	663224		0	724554
neprilysin 1	Nep1	170.1		0	31547		0	1279203		0	660501		0	408973
neprilysin 4	Nep4	170.2		0	42449		0	1273777		0	657941		0	411396
CG3774	CG3774	171.1	(1,2);	1	31553		0	1278374		0	656222		0	725569
CG14511	CG14511	171.2		2	43445		0	NA		0	NA		0	NA
spaghetti squash	sqh	172.1		0	31554	(1,2);	1	1270410,1276971		0	658477		0	550973
CG33098	CG33098	172.2		0	326253		0	5667687		0	NA		0	NA
myosin light chain 2	Mlc2	172.3		0	43587		0	1281552		0	663556		0	409881
CG3566	CG3566	173.1	(1,2);	1	31562		0	NA		0	NA		0	NA
CG6870	CG6870	173.2		0	35067		0	1277616		0	656171		0	726913
Cyt-b5	Cyt-b5	173.3		0	35688		0	1269985		0	663141	((1,2),3);	1	726860,726850,413486
CG5157	CG5157	173.4		2	39771		0	1281027		0	654982		0	724654
topoisomerase 3beta	Top3beta	174.1		0	31565		0	NA		0	664404		0	552787
topoisomerase 3alpha	Top3alpha	174.2		0	35236		0	1279455		0	662387		0	410571
Rpt4	Rpt4	175.1	(1,2);	1	31567		0	1281769		0	656146		0	551386
Rpt4R	Rpt4R	175.2		2	39351		0	NA		0	NA		0	NA
knockdown	kdn	176.1		0	31579		0	1280620		0	658667,TC014588		0	410059,406080
CG14740	CG14740	176.2		0	41468		0	NA		0	NA		0	NA
mitochondrial assembly regulatory factor	Marf	177.1	(1,2);	1	31581		0	1281313		0	658690		0	GB10834
fuzzy onions	fzo	177.2		2	42745		0	NA		0	NA		0	NA
protein phosphatase V	PpV	178.1		0	31582		0	1272934		0	655658		0	410924
protein phosphatase 19C	Pp4-19C	178.2		0	45031		0	1271515		0	TC015726		0	NA
microtubule star	mts	178.3		0	45959		0	1279592		0	662352		0	550710
copper transporter 1A	Ctr1A	179.1	((1,2),3);	3	31601		0	1281375		0	660576		0	551217
copper transporter 1B	Ctr1B	179.2		1	40989		0	NA		0	NA		0	NA
copper transporter 1C	Ctr1C	179.3		2	43668		0	NA		0	NA		0	NA
CG3198	CG3198	180.1		0	31602		0	1272586		0	662747		0	GB16659
CG7564	CG7564	180.2		0	39956		0	1277673		0	662617		0	551987
lethal (1) G0255	l(1)G0255	181.1	((1,2),3);	1	31605		0	1281238		0	655448		0	724321
CG4095	CG4095	181.2		2	31606		0	NA		0	NA		0	NA
CG6140	CG6140	181.3		3	39281		0	NA		0	NA		0	NA
CG14442	CG14442	182.1	(1,2);	1	31609		0	1273123		0	NA		0	GB14681
CG14440	CG14440	182.2		2	31610		0	NA		0	NA		0	NA
C3G	C3G	183.1		0	31618		0	1270418		0	662211		0	409856
Gef26	Gef26	183.2		0	33881		0	1280224		0	TC003942		0	408810
epac	Epac	183.3		0	35588		0	1269861		0	661613		0	NA
pod1	pod1	184.1		0	31620		0	1270415		0	661368		0	409082
coro	coro	184.2		0	35596		0	1276557,1269703		0	658242,655132		0	412080,409316
inactive	iav	185.1		0	31621		0	1271831		0	TC012368		0	726119
nanchung	nan	185.2		0	39571		0	1280447		0	656262		0	552792
nuclear factor Y-box C	Nf-YC	186.1		0	31622	(1,2);	1	1271801,4578056		0	655290		0	408615
Mes4	Mes4	186.2		0	37560		0	1275777		0	660566		0	725835
CG4542	CG4542	187.1		0	31623		0	1278755		0	664351		0	551841
CG5091	CG5091	187.2		0	34409		0	1279917		0	660992		0	NC_007070!2022177!2023781
Smg1	Smg1	188.1		0	31625		0	NW_045719.1!4158260!4164784		0	658025		0	727185
meiotic 41	mei-41	188.2		0	32608		0	1280291		0	655218		0	GB16077
CG4607	CG4607	189.1		0	31653		0	NW_001953044.1!14569491!14570618		0	NA		0	NA
CG8249	CG8249	189.2		0	36742		0	1275572		0	662122		0	408456
CG2059	CG2059	190.1	(1,2);	1	31663		0	1280255		0	100142272		0	414038
CG14717	CG14717	190.2		2	41412		0	NA		0	NA		0	NA
CG15035	CG15035	191.1	((1,2),3);	1	31673		0	NA		0	NA		0	NA
CG12091	CG12091	191.2		2	38177		0	1269417		0	659537		0	551694
fos intronic gene	fig	191.3		3	43511		0	NA		0	NA		0	NA
CG9657	CG9657	192.1		0	31674		0	1281983		0	100142226	(1,2);	1	724546,410683
CG6723	CG6723	192.2		0	41368		0	1281626		0	NA		0	NA
CG42235	CG42235	192.3		0	43136		0	1281156		0	NA		0	NA
CG1402	CG1402	193.1		0	31687		0	1272307		0	663015		0	413109
CG32698	CG32698	193.2		0	31915		0	1272280		0	661205		0	413383
CG10920	CG10920	194.1	(1,2);	1	31688		0	NA		0	NA		0	NA
mitochondrial carrier homolog 1	Mtch	194.2		2	38026		0	1270122		0	655849		0	726264
CG1409	CG1409	195.1	(1,2);	1	31689		0	NA		0	NA		0	NA
black pearl	blp	195.2		2	41937		0	EGK96712	(1,2);	1	660365,TC000333		0	725544
CG10932	CG10932	196.1		0	31695		0	1270608		0	663885		0	726218
yippee interacting protein 2	yip2	196.2		0	34313		0	1270244		0	656773		0	408291
CG9149	CG9149	196.3		0	38147		0	1281861		0	662066		0	NC_007071!11800731!11800934
Nek2	Nek2	197.1	(1,2);	1	31696		0	NA		0	NA		0	NA
nimA-like kinase	niki	197.2		2	42959		0	1270206		0	662248		0	NA
dpr14	dpr14	198.1		0	31702		0	1273467		0	NA		0	409608
dpr18	dpr18	198.2		0	32572		0	1273261,1273260		0	NA		0	409701
dpr20	dpr20	198.3		0	38101		0	NA		0	NA		0	412813
CG1444	CG1444	199.1		0	31703		0	1274678		0	660392		0	725258
CG31809	CG31809	199.2	((1,2),(3,4));	1	318954		0	NA		0	NA		0	NA
CG31810	CG31810	199.3		2	318955		0	NA		0	NA		0	NA
CG13284	CG13284	199.4		3	35021	(((1,2),3),4);	4	1275433,1278075,4578212,1278074		0	657772		0	410227
CG6012	CG6012	199.5		4	35022		0	NA		0	NA		0	NA
lethal (1) G0193	l(1)G0193	200.1	(1,2);	1	31712		0	1271866	((((1,2),3),(4,5)),6);	3	658141,658059,100142514,656143,TC006206,TC002380		0	725122
CG31664	CG31664	200.2		2	33359		0	NA		0	NA		0	NA
CG1571	CG1571	201.1	(1,2);	1	31725		0	NA		0	NA		0	NA
CG10859	CG10859	201.2		2	34756		0	1271217		0	NA		0	NA
CG6053	CG6053	201.3		0	39318		0	1271218		0	660389	((1,2),3);	3	412174,410477,GB13438(1-516aa)
CG2254	CG2254	202.1		0	31726		0	1273476,1271983		0	NA		0	NA
CG14946	CG14946	202.2		0	34627		0	NA		0	660853,658820		0	552746,411340
Ubc-E2H	Ubc-E2H	203.1	(1,2);	1	31728		0	1278673	(1,2);	1	656730,TC009277		0	412330
CG14739	CG14739	203.2		2	41467		0	NA		2	NA		0	NA
smad on X	Smox	204.1		0	31738		0	1279189		0	TC010162		0	412601
mothers against dpp	Mad	204.2		0	33529		0	1275428	(1,2);	1	659654,100141526		0	409301
daughters against dpp	Dad	204.3		0	42059		0	NA		0	658331		0	413371
medea	Med	204.4		0	43725		0	1273058		0	660074		0	409321
Gbeta5	Gbeta5	205.1		0	31744		0	1280292		0	664443		0	409113
G protein beta-subunit 13F	Gbeta13F	205.2		0	32544	(1,2);	1	1276580,1276578		0	658674		0	410497
G protein beta-subunit 76C	Gbeta76C	205.3		0	40148		0	1281667		0	662674		0	551950
CG12333	CG12333	205.4		0	42218		0	1274520		0	655325		0	411204
thioredoxin reductase-1	Trxr-1	206.1	(1,2);	1	31760		0	1271658		0	656062		0	410032
thioredoxin reductase 2	Trxr-2	206.2		2	40475		0	NA		0	NA		0	NA
TATA box binding protein-related factor 2	Trf2	207.1		0	31773	(1,2);	1	1269714,1271924		0	661723		0	412919
TBP-related factor	Trf	207.2		0	34102		0	1277867		0	657721		0	410753
TATA binding protein	Tbp	207.3		0	37476		0	1271006		0	657798		0	550692
CG1440	CG1440	208.1	(1,2);	1	31776		0	4577251		0	660395		0	724901
CG13423	CG13423	208.2		2	37315		0	NA		0	NA		0	NA
bifid	bi	209.1		0	31379		0	NA		0	661159		0	726842
optomotor-blind-related-gene-1	org-1	209.2		0	31778		0	1281834		0	660602		0	552311
H15	H15	209.3		0	33769		0	NA		0	NA		0	NA
midline	mid	209.4		0	33770		0	1275431,1275432		0	661420,661373		0	411133,726654+726635
Dorsocross3	Doc3	209.5	((1,2),3);	3	39036		0	NA		0	NA		0	NA
Dorsocross2	Doc2	209.6		1	39038	(1,2);	1	1276562,1276561		0	NA		0	NA
Dorsocross1	Doc1	209.7		2	39039		0	NA		0	654492		0	410885
brachyenteron	byn	209.8		0	39349		0	1280741		0	652935		0	412976
CG18789	CG18789	210.1	(1,2);	1	317813		0	NA		0	NA		0	NA
CG18787	CG18787	210.2		2	59163		0	1279410		0	664038		0	GB18885
Zyx102EF	Zyx102EF	211.1		0	317824		0	1271408		0	656358		0	412617
CG11063	CG11063	211.2		0	32351		0	1274688		0	655600		0	408431
CG32026	CG32026	212.1	((1,2),3);	1	317829		0	NA		0	NA		0	NA
lethal (1) G0156	l(1)G0156	212.2		3	32940		0	1273240		0	658559		0	409292
CG3483	CG3483	212.3		2	37900		0	NA		0	NA		0	NA
CG6439	CG6439	212.4		0	42586		0	1278179		0	662783		0	552128
CG5028	CG5028	212.5		0	43102		0	1269365	(1,2);	1	662903,657626		0	410396
elongase 68alpha	Elo68alpha	213.1	(1,2);	1	317841		0	NA		0	654965		0	411692
elongase 68beta	Elo68beta	213.2		2	39245		0	1272497		0	NA		0	NA
Vha16-3	Vha16-3	214.1	((((1,2),3),4),5);	1	317846		0	NA		0	NA		0	NA
CG6737	CG6737	214.2		3	34482		0	NA		0	NA		0	NA
CG9013	CG9013	214.3		4	36900		0	NA		0	NA		0	NA
Vha16-2	Vha16-2	214.4		2	39282		0	NA		0	NA		0	NA
vacuolar H[+] ATPase 16kD subunit	Vha16	214.5		5	44307		0	NA		0	656327		0	406076
CG32155	CG32155	215.1	(1,2);	1	317887		0	1277260		0	659635		0	551312
CG32154	CG32154	215.2		2	39778		0	NA		0	NA		0	NA
ovarian tumor	otu	216.1	(1,2);	1	31789	(1,2);	1	1275782,1277347+NW_045818.1!366283!366612		0	TC000504		0	726931
CG3251	CG3251	216.2		2	33671		0	NA		0	NA		0	NA
CG32191	CG32191	217.1	((1,2),3);	3	317903		0	NA		0	NA		0	NA
CG8646	CG8646	217.2		0	36394		0	1280621		0	TC007349		0	552073
CG8646	CG8646	217.3		0	36394		0	NW_001953042.1!12782091!12782270		0	661588		0	412829
CG7408	CG7408	217.4		1	39991		0	NA		0	NA		0	NA
CG7402	CG7402	217.5		2	39994	(1,2);	1	1270591,4577585	(((1,2),3),4);	4	664109,659587,659525,TC015567	(1,2);	1	551758,411657
CG32196	CG32196	218.1	(1,2);	1	317908		0	1272591		0	657379		0	725055
CG4306	CG4306	218.2		2	40017		0	NA		0	NA		0	NA
CG32260	CG32260	219.1		0	317943		0	NA		0	NA		0	NA
CG1299	CG1299	219.2		0	38496		0	1273147,1273150		0	659360,TC013326		0	550671
Trf4-1	Trf4-1	220.1	(1,2);	1	31795		0	1281604		0	TC009265		0	552662
Trf4-2	Trf4-2	220.2		2	42983		0	NA		0	NA		0	NA
CG32280	CG32280	221.1	(1,2);	1	317952		0	1275729		0	660763		0	551998
CG13559	CG13559	221.2		2	37720		0	NA		0	NA		0	NA
CG33791	CG33791	222.1		0	317974		0	NA		0	NA		0	NA
neural conserved at 73EF	Nc73EF	222.2		0	39899		0	1276976		0	662219,663572		0	408286,413768
CG1544	CG1544	222.3		0	43689		0	1271673		0	656360		0	412569
CG32320	CG32320	223.1	(1,2);	1	317977		0	NA		0	NA		0	NA
CG6845	CG6845	223.2		2	38019		0	1276111		0	664592		0	726434
CG32371	CG32371	224.1	(((((1,2),3),4),5),6);	2	317999		0	NA		0	NA		0	NA
CG31907	CG31907	224.2		4	319019		0	NA		0	NA		0	NA
CG15306	CG15306	224.3		5	31961		0	NA		0	NA		0	NA
CG2955	CG2955	224.4		6	33622		0	NA		0	NA		0	NA
Eb1	Eb1	224.5		1	35584	(1,2);	1	1275109,1276497		0	658702		0	411371
CG18190	CG18190	224.6		3	37179		0	NA		0	NA		0	NA
CG32373	CG32373	225.1	(1,2);	1	318000		0	NA		0	NA		0	NA
CG7526	CG7526	225.2		2	38850		0	1276384		0	100141909		0	725800
CG32413	CG32413	226.1	(1,2);	1	318018		0	NA		0	NA		0	NA
CG32412	CG32412	226.2		2	38663		0	1277195		0	NA		0	NA
CG6168	CG6168	226.3	(3,4);	3	39273		0	NA		0	NA		0	NA
CG5976	CG5976	226.4		4	40270		0	1279064		0	659407		0	411943
CG11284	CG11284	227.1		0	31804	((1,2),(3,4));	1	1271844,1268997,1269682,1273605		0	658563	(1,2);	1	GB10287,GB10099
carbonic anhydrase 1	CAH1	227.2		0	34786		0	1279482		0	663170		0	408827
carbonic anhydrase 2	CAH2	227.3		0	39390		3	NA		0	NA		0	NA
CG32463	CG32463	228.1	((1,2),3);	1	318044		0	NA		0	NA		0	NA
endonuclease G	EndoG	228.2		3	36309		0	1278115		0	TC011076		0	551715
CG4683	CG4683	228.3		2	41321		0	NA		0	NA		0	NA
CG32483	CG32483	229.1	(((1,2),3),4);	1	318050		0	NA		0	NA		0	NA
CG31823	CG31823	229.2		3	326163		0	NA		0	NA		0	NA
CG31821	CG31821	229.3		4	34938		0	NA		0	NA		0	NA
CG3344	CG3344	229.4		2	38083		0	1278251	(((1,2),3),4);	4	664210,TC000666,664203,TC000665		0	409162
CG32506	CG32506	230.1	(1,2);	1	318059		0	NA		0	NA		0	NA
CG1695	CG1695	230.2		2	33046		0	1273870		0	657420		0	NA
CG32581	CG32581	231.1	((1,2),3);	1	318098		0	NA		0	NA		0	NA
CG32847	CG32847	231.2		3	318245		0	NA		0	NA		0	NA
CG8974	CG8974	231.3		2	32532		0	1276712		0	658819		0	408751
moesin	Moe	232.1		0	31816		0	4575958		0	660394		0	412799
merlin	Mer	232.2		0	32979		0	1272693		0	660939		0	GB15815
CG32708	CG32708	233.1	(((1,2)3,),4);	4	318161		0	3290889		0	663269		0	724363
CG10993	CG10993	233.2		3	32344		0	NA		0	NA		0	NA
CG40813	CG40813	233.3		1	5740386		0	NA		0	NA		0	NA
CG41562	CG41562	233.4		2	5740411		0	NA		0	NA		0	NA
CG1885	CG1885	234.1	(1,2);	1	31817		0	1277887		0	655957		0	408847
CG9589	CG9589	234.2		2	41908		0	NA		0	NA		0	NA
CG32792	CG32792	235.1	((1,2),3);	1	318213		0	NA		0	NA		0	NA
pickpocket 28	ppk28	235.2		3	32671		0	1281572		0	657851		0	726792
pickpocket 12	ppk12	235.3		2	37566		0	NA		0	NA		0	NA
CG12661	CG12661	236.1	((1,2),3);	3	31822		0	NA		0	NA		0	NA
CG5323	CG5323	236.2		1	37137		0	1276652		0	662880		0	726527
CG5327	CG5327	236.3		2	37138		0	NA		0	NA		0	NA
CG32808	CG32808	237.1	((1,2),3);	3	318221	(1,2);	1	1275705,1277138	(1,2);	1	100141789,661254		0	409626
CG12951	CG12951	237.2		1	41110		0	NA		0	NA		0	NA
CG16749	CG16749	237.3		2	41111		0	NA		0	NA		0	NA
CG32832	CG32832	238.1	((1,2),3);	3	318237		0	NA		0	NA		0	NA
CG9396	CG9396	238.2		1	41156		0	NA		0	NA		0	413186
CG9399	CG9399	238.3		2	41157		0	1275713		0	658705		0	NA
CG32845	CG32845	239.1	(1,2);	1	318243		0	NA		0	NA		0	NA
dodo	dod	239.2		2	33111		0	1274464		0	655927		0	551817
CG7267	CG7267	240.1	(1,2);	1	31831		0	NA		0	NA		0	NA
CG15449	CG15449	240.2		2	33079	(1,2);	1	1270458,1270459		0	664209		0	724580
CG7033	CG7033	241.1		0	31838		0	1279082		0	659228		0	409809
T-cp1zeta	Tcp-1zeta	241.2		0	32518		0	1272849		0	656104		0	551295
CG5525	CG5525	241.3		0	34674		0	1271406		0	662113		0	551275
T-complex chaperonin 5	Cct5	241.4		0	36308		0	1277732		0	656755		0	409825
Tcp-1eta	Tcp-1eta	241.5		0	41054		0	1273205		0	655805		0	550694
cctgamma	Cctgamma	241.6		0	42029		0	1273209		0	662414		0	409296
Tcp1-like	T-cp1	241.7		0	42649		0	1274083		0	657631		0	409134
CG7766	CG7766	242.1		0	31839		0	4576002+NW_045720.1!1261853!1262893		0	659289		0	550706
CG8475	CG8475	242.2		0	34114		0	1280244		0	100142267		0	551940
histone H3.3B	His3.3B	243.1	(1,2);	1	31848		0	1280489		0	658914		0	552116
histone H3.3A	His3.3A	243.2		2	33736		0	NA		0	NA		0	NA
histone H3	His3:CG31613	243.3	((3,4),5);	5	318847		0	1267439		0	658175		0	725272
histone H3	His3:CG33863	243.4		3	3772173		0	NA		0	NA		0	NA
histone H3	His3:CG33866	243.5		4	3772189		0	NA		0	NA		0	NA
CG31019	CG31019	244.1		0	318558		0	5667421		0	TC004647		0	552096
CG32627	CG32627	244.2		0	32329		0	1272157		0	663775	(1,2);	1	GB10742,551792
CG32627	CG32627	244.3		0	32329		0	5570533(Aaeg)		0	655897		0	412727
CG31053	CG31053	245.1	(1,2);	1	318572		0	NA		0	TC012397		0	NA
CG12200	CG12200	245.2		2	32932		0	3290227		0	NA		0	725517
CG31065	CG31065	246.1		0	318575		0	1272421		0	664208		0	NA
pickpocket 13	ppk13	246.2		0	3346226		0	1278009		0	655871		0	NA
pickpocket 13	ppk13	246.3		0	3346226		0	NA		0	662144		0	725359
CG31076	CG31076	247.1		0	318582		0	1281754		0	NA		0	NA
CG31274	CG31274	247.2	(1,2);	1	318655		0	1269680		0	656166		0	551570
misexpression suppressor of KSR 4	MESK4	247.3		2	64872		0	NA		0	NA		0	NA
CG31077	CG31077	248.1	(1,2);	1	318583		0	NA		0	NA		0	NA
CG17826	CG17826	248.2		2	39354		0	NA	(1,2);	1	100313959,100142085		0	726565
CG31115	CG31115	249.1	(1,2);	1	318597		0	NA		0	NA		0	NA
CG4802	CG4802	249.2		2	36955		0	1274807		0	655565		0	552740
CG15368	CG15368	250.1		0	31861		0	NA		0	NA		0	NA
CG33936	CG33936	250.2		0	41114		0	1274317,5667650		0	657775,663257		0	410085
CG31198	CG31198	251.1	(1,2);	1	318622	(1,2);	1	4577397(1-925aa),4577397(926-1721aa)	((1,2),3);	3	661751,661712(1-969aa),661712(970-1923aa)	((1,2),3);	1	409619(1-945aa),409619(946-1846aa),409619(1847-2722aa)
CG42335	CG42335	251.2		2	42558		0	NA		0	NA		0	NA
CG31202	CG31202	252.1	(1,2);	1	318624		0	NA		0	NA		0	NA
alpha mannosidase I	alpha-Man-I	252.2		2	31957		0	1271667		0	658773		0	409174
CG11874	CG11874	252.3		0	43436		0	1269471		0	659709		0	413579
CG31251	CG31251	253.1		0	318645		0	NA		0	659986		0	412375
nudC	nudC	253.2		0	39879		0	1276787		0	656519		0	408304
CG31262	CG31262	254.1	(((1,2),3),4);	3	318649		0	NA		0	NA		0	NA
CG33124	CG33124	254.2		1	318891		0	NA		0	NA		0	NA
CG31668	CG31668	254.3		2	33395		0	NA		0	NA		0	NA
CG8451	CG8451	254.4		4	34117		0	1278123		0	660931		0	725617
CG31294	CG31294	255.1	(((1,2),3),4);	1	318666		0	NA		0	NA		0	NA
CG6980	CG6980	255.2		4	42955		0	5667195		0	658507		0	727151
CG34274	CG34274	255.3		2	5740212		0	NA		0	NA		0	NA
CG34297	CG34297	255.4		3	5740802		0	NA		0	NA		0	NA
ionotropic receptor 8a	Ir8a	256.1		0	31867		0	1272638		0	656746		0	409777
ionotropic receptor 25a	Ir25a	256.2		0	33683		0	1279695		0	659899		0	412949
CG31373	CG31373	257.1	(1,2);	1	318700		0	NA		0	NA		0	411610
CG31278	CG31278	257.2		2	41282		0	1271597		0	655709		0	NA
downstream of raf1	Dsor1	258.1		0	31872		0	1282062		0	661995		0	724834+409925
licorne	lic	258.2		0	32257		0	1271952		0	661608		0	GB16739
MAP kinase kinase 4	Mkk4	258.3		0	41020		0	1275042		0	662917		0	410575
CG31413	CG31413	259.1	(((1,2),3),4);	3	318720		0	NA		0	NA		0	NA
CG4670	CG4670	259.2		4	36464		0	1269735	((((1,2),3),4),5);	4	655759,660617,655674,100142031,100141818		0	725287
CG6690	CG6690	259.3		1	42582		0	NA		0	NA		0	NA
CG17843	CG17843	259.4		2	42583		0	NA		0	NA		0	NA
CG31414	CG31414	260.1	(1,2);	1	318721		0	1281524	((((1,2),3),4),5);	4	664563,664564,664562,664516,664560	(1,2);	1	409708,409709
CG31148	CG31148	260.2		2	42796		0	NA		0	NA		0	NA
Tak1-like 1	Takl1	261.1	((1,2),3);	1	318725		0	NA		0	NA		0	NA
TGF-beta activated kinase 1	Tak1	261.2		3	39659		0	NW_045730.1!1349628!1350497		0	656961		0	413809
Tak1-like 2	Takl2	261.3		2	42692		0	NA		0	NA		0	NA
CG31454	CG31454	262.1	((1,2),3);	3	318744		0	NA		0	NA		0	NA
CG11737	CG11737	262.2		1	41009		0	1270017		0	664327		0	726102
CG31259	CG31259	262.3		2	41010		0	NA		0	NA		0	NA
CG31467	CG31467	263.1	((1,2),3);	1	318751		0	NA		0	NA		0	NA
CG31391	CG31391	263.2		2	41280		0	NA		0	NA		0	NA
CG14689	CG14689	263.3		3	41283		0	NA		0	660702		0	GB10894
CG31473	CG31473	264.1	(1,2);	1	318753		0	NA		0	NA		0	NA
CG31472	CG31472	264.2		2	40925		0	1269333		0	660386		0	409066
CG17440	CG17440	265.1	(1,2);	1	31879		0	NA		0	NA		0	NA
CG17446	CG17446	265.2		2	31880		0	1278526		0	658793		0	411265
dumpy	dp	266.1		0	318824		0	4578432+5668297+1279452		0	TC011986		0	GB13778
CG9572	CG9572	266.2		0	33013		0	1272925		0	659141		0	NA
lozenge	lz	267.1		0	31883		0	1273456		0	660060		0	410537
RunxB	RunxB	267.2		0	33051		0	NA		0	657356		0	GB15836
runt	run	267.3		0	33059		0	5666824		0	657742		0	726124
RunxA	RunxA	267.4		0	4379817		0	NW_045684.1!224162!224275+NW_045684.1!186409!186519		0	657431		0	410535
histone H4	His4:CG31611	268.1	((1,2),3);	1	318846		0	NA		0	NA		0	NA
histone H4	His4:CG33871	268.2		2	3772708		0	NA		0	NA		0	NA
histone H4 replacement	His4r	268.3		3	41773		0	1267440		0	656232	(1,2);	1	724757,406132
histone H2A	His2A:CG31618	269.1	((1,2),3);	3	318855		0	1267699		0	655019		0	726468
histone H2A	His2A:CG33862	269.2		2	3772278		0	NA		0	NA		0	NA
histone H2A	His2A:CG33865	269.3		1	3772505		0	NA		0	NA		0	NA
histone H2A variant	His2Av	269.4		0	43229		0	1271957		0	664368		0	551779
CG34449	CG34449	270.1		0	31887		0	NW_045719.1!1176814!1177032+NW_045719.1!1176549!1176734		0	657384		0	GB11048
approximated	app	270.2		0	39399		0	1274788		0	655060		0	412051
CG31674	CG31674	271.1	((1,2),3);	1	318878		0	NA		0	NA		0	NA
CG9331	CG9331	271.2		2	35347	(1,2);	1	1278984,1278986		0	656453		0	410042
CG31673	CG31673	271.3		3	35348		0	NA		0	NA		0	NA
CG31687	CG31687	272.1	(1,2);	1	318886		0	NA		0	NA		0	NA
CG31688	CG31688	272.2		0	35314		0	1279558		0	656116		0	411366
cdc23	cdc23	272.3		2	35315		0	1279299		0	655858		0	413499
p24-related-2	p24-2	273.1	(1,2);	1	318890		0	NA		0	NA		0	NA
eclair	eca	273.2		2	41177		0	1274213		0	100142108		0	412554
CG31715	CG31715	274.1	(1,2);	1	318909		0	NA		0	660937		0	551350
CG7423	CG7423	274.2		2	32894		0	NA		0	NA		0	NA
CG33178	CG33178	275.1	((1,2),3);	1	318913		0	NA		0	NA		0	NA
CG33177	CG33177	275.2		2	32438		0	NA		0	NA		0	NA
microsomal glutathione S-transferase-like	Mgstl	275.3		3	44110	((1,2),3);	1	1272100,1272098,1279363	(((1,2),(3,4)),5);	5	657036,TC009129,TC011646,TC009128_1,TC009128_2	(1,2);	1	410837,725853
histone demethylase 4B	Kdm4B	276.1		0	318918		0	1270747		0	663231		0	726918
little imaginal discs	lid	276.2		0	33837		0	1275113		0	TC010807		0	GB11303
histone demethylase 4A	Kdm4A	276.3		0	35744		0	1270293		0	NA		0	NA
CG31730	CG31730	277.1	((1,2),3);	1	318920		0	NA		0	NA		0	NA
CG31851	CG31851	277.2		2	318982		0	NA		0	NA		0	NA
CG14222	CG14222	277.3		3	32962		0	1281245		0	664281		0	414027
arrest defective 1	Ard1	277.4		0	39175		0	1276109		0	658076		0	726609
CG31742	CG31742	278.1	((1,2),3);	1	318924		0	NA		0	NA		0	NA
proteasome beta5R subunit	Prosbeta5R	278.2		2	37690		0	NA		0	NA		0	NA
proteasome beta5 subunit	Prosbeta5	278.3		3	45269		0	1272519		0	658739		0	411206
nimrod A	nimA	279.1		0	318930		0	NW_001953046.1!8121619!8122179		0	NA		0	NA
draper	drpr	279.2		0	38218		0	1269892		0	663845,100142175		0	552479,724963
CG31802	CG31802	280.1	(1,2);	1	318949		0	NA		0	NA		0	NA
CG17493	CG17493	280.2		2	3355126		0	1280223		0	660873		0	412449
CG31814	CG31814	281.1		0	318958		0	1275637		0	663721		0	411345
CG6867	CG6867	281.2		0	32782		0	1276518		0	659930		0	725563
CG31646	CG31646	281.3		0	33795		0	1279645,1279644		0	663761,663748,663736		0	414025,410655,413555
CG14010	CG14010	281.4		0	33793		0	1275636		0	NA		0	NA
CG11320	CG11320	281.5		0	33925		0	NA		0	NA		0	NA
CG34391	CG34391	281.6		0	5740816		0	1275796		0	658094	(1,2);	1	410662,551681
CG32700	CG32700	282.1	(1,2);	1	31896		0	NA		0	NA		0	NA
CG6123	CG6123	282.2		2	32815		0	3289681		0	655989		0	552490
ribosomal protein S28b	RpS28b	283.1	((1,2),3);	1	31897		0	1272785		0	659616	(1,2);	1	724629,724531
ribosomal protein S28a	RpS28a	283.2		2	43564		0	NA		0	NA		0	NA
CG34182	CG34182	283.3		3	5740688		0	NA		0	NA		0	NA
CG31864	CG31864	284.1	(1,2);	1	318990		0	NA		0	NA		0	NA
CG12264	CG12264	284.2		2	34613		0	1280047		0	663454		0	410039
Ada1-1	Ada1-1	285.1	(1,2);	1	318991		0	1270882		0	663595		0	412199
Ada1-2	Ada1-2	285.2		2	318992		0	NA		0	NA		0	NA
CG31913	CG31913	286.1	(1,2);	1	319023		0	NA		0	NA		0	NA
CG15653	CG15653	286.2		2	37388		0	1276810	(1,2);	1	663757,TC003395		0	NA
CG31924	CG31924	287.1	((1,2),3);	1	319030		0	NA		0	NA		0	NA
CG5565	CG5565	287.2		2	33323		0	NA		0	NA		0	NA
GS1-like	Gs1l	287.3		3	33653		0	1275049	(1,2);	1	663851,663913		0	725653
CG31975	CG31975	288.1	(1,2);	1	319052		0	NA		0	NA		0	NA
CG31974	CG31974	288.2		2	33174		0	1279949	((((1,2),3),(4,5)),6);	1	655281,660404,657005,655205,655368,TC007974	(1,2);	1	724536,725439
lethal (1) G0232	l(1)G0232	289.1		0	31907		0	1282054		0	TC000182		0	411227
ia2	ia2	289.2		0	33277		0	1277829		0	663427		0	551375
Leukocyte-antigen-related-like	Lar	289.3		0	35259		0	1279520		0	659707		0	413569
protein tyrosine phosphatase 61F	Ptp61F	289.4		0	38160		0	1276060		0	657787		0	408900
protein tyrosine phosphatase 69D	Ptp69D	289.5		0	39443		0	1273859		0	659057		0	725118
protein tyrosine phosphatase 99A	Ptp99A	289.6		0	43469		0	1273129		0	660278		0	725294
corkscrew	csw	289.7		0	45278		0	1273523		0	660085		0	GB10063
imaginal disc growth factor 4	Idgf4	290.1	(((1,2),3),((4,5),6));	1	31926	(1,2);	1	1277890,4578332	(1,2);	1	655022,655122		0	413324
Chitinase-like	Chit	290.2		3	36868		0	NA		0	NA		0	NA
imaginal disc growth factor 5	Idgf5	290.3		2	37104		0	NA		0	NA		0	NA
imaginal disc growth factor 2	Idgf2	290.4		4	34979		0	NA		0	NA		0	NA
imaginal disc growth factor 1	Idgf1	290.5		5	34978		0	NA		0	NA		0	NA
imaginal disc growth factor 3	Idgf3	290.6		6	34981		0	NA		0	NA		0	NA
CG15309	CG15309	291.1		0	31949		0	1271194		0	655221		0	408838
yippee	Yippee	291.2		0	32295		0	1272372		0	656509		0	724141
CG32683	CG32683	292.1		0	31970		0	1281035		0	661661		0	551043
arrestin 1	Arr1	292.2		0	35078		0	1279554		0	657618		0	412907
arrestin 2	Arr2	292.3		0	38993		0	1276917		0	661335		0	550791
kurtz	krz	292.4		0	53554		0	1278336		0	661293		0	409006
CG15296	CG15296	293.1	(1,2);	1	31986		0	NA		0	NA		0	NA
CG7603	CG7603	293.2		2	39948		0	1274785		0	TC004236		0	725253
CG1628	CG1628	294.1		0	31990		0	1271790		0	663416		0	552595
congested-like trachea	colt	294.2	(1,2);	1	33470		0	1276776		0	655653		0	552361
CG3476	CG3476	294.3		2	33987		0	NA		0	NA		0	NA
CG4995	CG4995	294.4		0	34390		0	1280084		0	659412		0	725922
CG2111	CG2111	295.1	((7,8),9);	9	31995		0	NA		0	NA		0	NA
CG11951	CG11951	295.2		1	43463		0	NA		0	NA		0	NA
CG31427	CG31427	295.3		2	43464		0	NA		0	NA		0	NA
CG10602	CG10602	295.4		7	35146		0	1279320		0	661729		0	NA
slamdance	sda	295.5		8	44359		0	NA		0	NA		0	NA
SP1029	SP1029	295.6	(((1,2),(3,4)),(5,6));	3	53473		0	1277402		0	657312		0	NA
CG31445	CG31445	295.7		4	326140		0	NA		0	NA		0	NA
CG7653	CG7653	295.8		5	34935		0	NA		0	NA		0	NA
CG3502	CG3502	295.9		6	37695		0	NA		0	NA		0	NA
CG14516	CG14516	295.10		0	43444	(1,2);	1	1274368(1-773aa),1274368(774-1746aa)		0	TC004952		0	412808
Autophagy-specific gene 8a	Atg8a	296.1	(1,2);	1	32001		0	1273277		0	661847		0	725184
Autophagy-specific gene 8b	Atg8b	296.2		2	42132		0	NA		0	NA		0	NA
stress-sensitive B	sesB	297.1	(1,2);	1	32007		0	1273606		0	656975		0	406075
adenine nucleotide translocase 2	Ant2	297.2		2	32008		0	1270282	(1,2);	1	662040,TC010013		0	412477
fascetto	feo	298.1	(1,2);	1	32015		0	NA		0	NA		0	NA
sister of feo	sofe	298.2		2	32016		0	1268832	((1,2),3);	1	663717,660149,658948		0	GB17611
CG15208	CG15208	299.1	(1,2);	1	32022		0	NA		0	NA		0	NA
CG14995	CG14995	299.2		2	38487		0	1276536		0	654939		0	411663
CG2145	CG2145	300.1	(1,2);	1	32027		0	6047518(Cqui)		0	656443	((1,2),3);	1	552734,552728,100577355
CG3303	CG3303	300.2		2	41931		0	NA		0	NA		0	NA
CG2076	CG2076	301.1	(1,2);	1	32041		0	1279301		0	NA		0	NA
CG1287	CG1287	301.2		2	40898		0	NA		0	662464		0	409189
heat shock protein 60	Hsp60	302.1	(((1,2),3),4);	4	32045		0	1278824		0	660294		0	409384
Hsp60C	Hsp60C	302.2		3	33796		0	NA		0	NA		0	NA
Hsp60D	Hsp60D	302.3		1	34763		0	NA		0	NA		0	NA
heat shock protein 60 related	Hsp60B	302.4		2	48572		0	NA		0	NA		0	NA
Rpt3	Rpt3	303.1		0	32047		0	1272945		0	656344		0	410026
Rpt3R	Rpt3R	303.2	(1,2);	1	41190		0	NA		0	NA		0	NA
proteasome 26S subunit subunit 4 ATPase	Pros26.4	303.3		2	42828		0	1273890		0	663731		0	551128
Klp10A	Klp10A	304.1	((1,2),3);	3	32049		0	1272103	((1,2),3);	1	660770,657981,TC014679		0	409727
Klp59C	Klp59C	304.2		1	37671		0	NA		0	NA		0	NA
Klp59D	Klp59D	304.3		2	37674		0	NA		0	NA		0	NA
CG11105	CG11105	305.1		0	32063	(1,2);	1	1279002,1274102		0	661960		0	409318
CG5890	CG5890	305.2		0	43126		0	1281121		0	654909		0	411693
ionotropic receptor 10a	Ir10a	306.1	(1,2);	1	32067		0	NA	((((((&(1,2),3),4),5),6),7),(8,9)),(10,11));	6	655782,TC009416_1,TC009416_2,TC009416_3,TC009417,TC009418,TC003059,TC015398,TC004081,TC002654,TC002656		0	NA
ionotropic receptor 100a	Ir100a	306.2		2	43753	((1,2),3);	1	1272127,5666773,1274623		0	NA	(1,2);	1	GB14653,GB14403
CG1657	CG1657	307.1		0	32070		0	NA		0	663113		0	411806
CG9139	CG9139	307.2		0	38144		0	1276236		0	658256		0	412728
glutamine synthetase 2	Gs2	308.1		0	32087		0	1273608		0	656087		0	410066
glutamine synthetase 1	Gs1	308.2		0	33172		0	1279950		0	NA		0	NA
sphingosine kinase 1	Sk1	309.1	(1,2);	1	32089		0	NA		0	NA		0	NA
sphingosine kinase 2	Sk2	309.2		2	326219		0	1270104		0	658654		0	411349
RNA polymerase II 215kD subunit	RpII215	310.1		0	32100		0	1278148		0	662266		0	550829
CG17209	CG17209	310.2		0	32524		0	1278527		0	656547		0	GB16969
RNA polymerase I subunit	RpI1	310.3		0	36617		0	NA		0	659526		0	725216
rhomboid-4	rho-4	311.1		0	32109		0	1278488	(1,2);	1	663099,661276		0	412319
rhomboid-6	rho-6	311.2		0	34640		0	1269249		0	NA		0	NA
rhomboid	rho	311.3	((1,2),3);	1	38168		0	NA		0	NA		0	NA
stem cell tumor	stet	311.4		2	38169		0	1274741		0	657740		0	NW_001254450!3689!3802
roughoid	ru	311.5		3	44856		0	NA		0	NA		0	NA
CG1703	CG1703	312.1		0	32112		0	NA		0	660218		0	413390
CG9281	CG9281	312.2		0	32508		0	1273267		0	655357		0	413252
CG9330	CG9330	312.3		0	40131		0	1280669,1280440		0	661570		0	413652
Methoprene-tolerant	Met	313.1	(1,2);	1	32114		0	NA		0	NA		0	NA
germ cell-expressed bHLH-PAS	gce	313.2		2	32457		0	1276689		0	654980		0	411534
dusky	dy	314.1		0	32130		0	1272381		0	657480		0	410581
dusky-like	dyl	314.2		0	38531		0	1273887		0	656389		0	408277
miniature	m	314.3		0	44835		0	1272378		0	657403		0	408508
CG31787	CG31787	315.1	((1,2),3);	1	318941		0	NA		0	NA		0	NA
p24-related-1	p24-1	315.2		3	32140		0	1270444		0	658261		0	409545
CG9053	CG9053	315.3		2	32435		0	4576804		0	655256		0	NA
CG2025	CG2025	316.1	(1,2);	1	32143		0	1280290		0	655191		0	552055
CG10588	CG10588	316.2		2	40316		0	NA		0	NA		0	NA
CG10353	CG10353	317.1		0	32148		0	1272176		0	664496		0	NA
CG6938	CG6938	317.2		0	39362		0	1272564		0	658670		0	GB14861
CG16718	CG16718	317.3		0	42340		0	NA		0	657882		0	GB10577
Upf1	Upf1	318.1		0	32153		0	1282033		0	662109		0	409839
CG6701	CG6701	318.2	(1,2);	1	36550		0	NA		0	NA		0	NA
CG6967	CG6967	318.3		2	36922		0	1280767		0	NA		0	NA
CG7504	CG7504	318.4		0	38904		0	1276593		0	NA		0	725908
Ca-alpha1T	Ca-alpha1T	319.1		0	31550		0	1273457		0	TC005355		0	551883
cacophony	cac	319.2		0	32158	(1,2);	1	1273390,NW_045730.1!7650372!7650794+NW_045730.1!7651927!7652463+NW_045730.1!7652552!7652656+3290639	(1,2);	1	100306946,661666		0	408764
paralytic	para	319.3		0	32619		0	1278521	(1,2);	1	656403,656391		0	409018
Ca[2+]-channel protein alpha[[1]] subunit D	Ca-alpha1D	319.4		0	34950		0	4578503		0	659557		0	100578899
Na channel protein 60E	NaCP60E	319.5		0	37981		0	1270015		0	664574		0	411653
twisted gastrulation	tsg	320.1	((1,2),3);	1	32160		0	NA		0	NA		0	NA
CG11582	CG11582	320.2		2	38525		0	NA		0	NA		0	NA
crossveinless	cv	320.3		3	44510		0	1271959		0	100142000		0	409124
CG18130	CG18130	321.1	(1,2);	1	32161		0	1280413		0	661374	(1,2);	1	725664,409038
CG14221	CG14221	321.2		2	32961		0	NA		0	NA		0	NA
furrowed	fw	322.1		0	32162		0	1270412		0	100141585		0	413543
CG9095	CG9095	322.2		0	32447		0	1272144		0	660816		0	411888
CG1492	CG1492	323.1	(1,2);	1	32164		0	NA		0	NA		0	NA
CG4829	CG4829	323.2		2	32672		0	1277367		0	663258		0	726158
CG6461	CG6461	323.3		0	32839		0	1279663		0	661898		0	410096
CG17636	CG17636	323.4		0	5740847		0	1279883		0	659110		0	NA
regucalcin	regucalcin	324.1	(1,2);	1	32165	(((1,2),3),4);	3	1281671,1279833,1278168,1278169	(((((1,2),3),4),5),6);	1	656188,656019,656271,656152,656355,655940	(1,2);	1	413627,725484
senescence marker protein-30	smp-30	324.2		2	41786		0	NA		0	NA		0	NA
CG15735	CG15735	325.1	(1,2);	1	32167		0	1269387		0	661329		0	408457
CG14164	CG14164	325.2		2	39167		0	NA		0	NA		0	NA
ubiquitin-specific protease 7	Usp7	326.1		0	32169		0	1277443		0	663824		0	GB17081
Ubiquitin-specific protease 64E	Ubp64E	326.2		0	38644		0	4576308		0	656421		0	408911
CG7023	CG7023	326.3		0	42702		0	1280538		0	663037		0	552660
CG1950	CG1950	327.1	(1,2);	1	32173		0	NA		0	NA		0	NA
CG8445	CG8445	327.2		0	36794		0	NW_045840.1!7111767!7112597		0	663933		0	725780
ubiquitin C-terminal hydrolase	Uch-L3	327.3		2	39102		0	1276223		0	656089		0	413813
CG1924	CG1924	328.1	(((1,2),3),4);	1	32180		0	NA		0	NA		0	NA
CG9906	CG9906	328.2		3	32620		0	NA		0	NA		0	NA
CG11235	CG11235	328.3		4	33067		0	NA		0	NA		0	NA
calreticulin	Crc	328.4		0	41166		0	1274052		0	TC012278		0	409165
calnexin 99A	Cnx99A	328.5		2	44643		0	1274867		0	663930		0	552528
tenascin accessory	Ten-a	329.1		0	32183		0	1271779		0	654865		0	NA
tenascin major	Ten-m	329.2		0	40464		0	1269465		0	664026		0	410739,411155
LIM-kinase1	LIMK1	330.1		0	32207		0	1280929		0	657421		0	413152
center divider	cdi	330.2		0	42289		0	1273935		0	659807		0	413385
CG2543	CG2543	331.1	(1,2);	1	32212		0	1275381		0	663414		0	413810
CG31773	CG31773	331.2		2	326159		0	NA		0	NA		0	NA
CG2540	CG2540	332.1		0	32216		0	1269344		0	659981		0	727004
CG10365	CG10365	332.2		0	42801		0	1281523		0	658543		0	NA
ade5	ade5	333.1	(((1,2),3),4);	3	32228		0	1272084		0	656066		0	551966
CG17024	CG17024	333.2		4	34664		0	NA		0	NA		0	NA
CG41581	CG41581	333.3		1	5740426		0	NA		0	NA		0	NA
CG40801	CG40801	333.4		2	5740548		0	NA		0	NA		0	NA
CG12717	CG12717	334.1	((1,2),3);	1	32229		0	NA		0	NA		0	NA
CG10107	CG10107	334.2		3	38748		0	1276547		0	659719	(1,2);	1	726735,725270
CG41423	CG41423	334.3		2	5740393		0	NA		0	NA		0	NA
CG3812	CG3812	335.1		0	32230	(1,2);	1	1281097,1271312		0	656882	(((1,2),3),4);	4	552139,724951,724995,724907
fu12	fu12	335.2		0	34176	(1,2);	1	3291966,1271319		0	657629		0	NA
phosphodiesterase 9	Pde9	336.1		0	32233		0	1273035		0	658906		0	410379
phosphodiesterase 11	Pde11	336.2		0	35107		0	1275495		0	662654		0	GB18775
phosphodiesterase 6	Pde6	336.3		0	41760		0	1273943		0	656211		0	410630
CG4407	CG4407	337.1	(1,2);	1	32240		0	1273225		0	661017		0	727191
CG16848	CG16848	337.2		2	34759		0	NA		0	NA		0	NA
CG4404	CG4404	338.1	((1,2),3);	1	32241		0	NA		0	NA		0	NA
CG3838	CG3838	338.2		3	34275		0	1280805		0	NA		0	408314
CG3919	CG3919	338.3		2	39582		0	NA		0	NA		0	NA
CG4395	CG4395	339.1		0	32246		0	1281991		0	656939		0	NA
diuretic hormone 31 receptor 1	Dh31-R1	339.2		0	36475		0	1279176		0	657479		0	412591
CG42629	CG42629	340.1		0	32253		0	3290563		0	660407		0	550906
Rapgap1	Rapgap1	340.2		0	34032		0	1271375		0	661653	((1,2),3);	2	408271,408780,413473
gprs	gprs	340.3		0	36862		0	1280431		0	100142243		0	550732
ferritin 3 heavy chain homologue	Fer3HCH	341.1		0	32260		0	NA		0	656261		0	408663
ferritin 1 heavy chain homologue	Fer1HCH	341.2		0	46415		0	1273495		0	655420		0	551651
CG6978	CG6978	342.1	(1,2);	1	31413		0	NA		0	NA		0	NA
CG4330	CG4330	342.2		0	32263		0	NA		0	TC006625		0	GB16920
CG4726	CG4726	342.3		0	33292		0	1279029		0	662886		0	410920
picot	Picot	342.4		2	36865		0	1280438		0	655821		0	410278
CG4332	CG4332	343.1		0	32267		0	1281679		0	655566		0	726579
CG3702	CG3702	343.2		0	33628		0	1278029		0	657329		0	727027
HDAC4	HDAC4	344.1		0	32278		0	1271834		0	655770		0	408331
HDAC6	HDAC6	344.2		0	32461		0	1271709		0	TC014236		0	725938
CG15743	CG15743	345.1		0	32279		0	1281781		0	663675		0	726824
CG7789	CG7789	345.2		0	43516		0	1277299		0	663948		0	411106
inositol 1,4,5-triphosphate kinase 2	IP3K2	346.1		0	32285		0	1269360		0	657796		0	409943
inositol 1,4,5-triphosphate kinase 1	IP3K1	346.2		0	34300		0	NW_001953046.1!2622656!2623396		0	661862		0	413817
doublesex-Mab related 11E	dmrt11E	347.1	(1,2);	1	32291		0	NA		0	NA		0	NA
doublesex	dsx	347.2		0	40940		0	1270904		0	660453		0	725126
doublesex-Mab related 93B	dmrt93B	347.3		2	42494		0	1281789		0	TC002261		0	409455
doublesex-Mab related 99B	dmrt99B	347.4		0	43495		0	1271814		0	664586		0	726743
Rbp1-like	Rbp1-like	348.1	(1,2);	1	32293		0	NA		0	NA		0	NA
xl6	xl6	348.2		0	33967		0	1277682		0	657225		0	727087
repressor splicing factor 1	Rsf1	348.3		0	34370		0	1280099		0	NA		0	413508
RNA-binding protein 1	Rbp1	348.4		2	41294		0	1269848		0	658639		0	413835
CG1998	CG1998	349.1	(1,2);	1	32300	((((((1,2),3),4),5),(6,7)),(8,9));	8	1272180,1273201,1272179,4577211,3290684,1270437,1273202,1273884,1273200		0	654920		0	409360
CG11162	CG11162	349.2		2	32325		0	NA		0	NA		0	NA
CG12177	CG12177	350.1	((1,2),3);	1	32326		0	NA		0	NA		0	NA
CG11158	CG11158	350.2		2	32327		0	1280910		0	655602		0	NA
CG5418	CG5418	350.3		3	34663		0	NA		0	NA		0	GB12988
retinal degeneration B	rdgB	351.1		0	32340		0	1272246		0	TC003397		0	409865
rdgBbeta	rdgBbeta	351.2		0	37011		0	3291020		0	659600		0	413275
vibrator	vib	351.3		0	42306		0	1281167		0	657428		0	552183
CG10992	CG10992	352.1		0	32341	((1,2),3);	1	1274679,1274676,1274680	(((1,2),((3,4),(5,6))),(7,8));	1	663145,663117,663066,655148,663090,655077,657203,657117		0	NA
CG3074	CG3074	352.2		0	37537		0	1269545		0	656198		0	409789
CG11103	CG11103	353.1		0	32342		0	1273139		0	660580		0	408370
CG10795	CG10795	353.2		0	37443		0	1269739		0	664503		0	552462
almondex	amx	353.3		0	43869		0	1276781		0	663997		0	551791
CG11092	CG11092	354.1	(1,2);	1	32350		0	NA		0	661634		0	NA
CG7262	CG7262	354.2		2	41804		0	1272828		0	NA		0	410343
lethal (1) G0007	l(1)G0007	355.1		0	32373		0	1277444		0	658113		0	726778
CG32533	CG32533	355.2		0	32933		0	1281840		0	662377		0	413592
CG3225	CG3225	355.3		0	33680		0	1271086		0	TC000112		0	413147
CG4901	CG4901	355.4		0	34357		0	1276808		0	TC013109		0	726350
lethal (2) 37Cb	l(2)37Cb	355.5		0	35192		0	1280046,1269919		0	659920		0	726598
CG11107	CG11107	355.6		0	35654		0	1270778		0	654855		0	408535
peanuts	pea	355.7		0	36561		0	NA		0	NA		0	550940
CG1434	CG1434	356.1		0	32377		0	1277369		0	658663		0	410264
CG3645	CG3645	356.2		0	33190		0	1277494		0	655886		0	409102
mRNA-capping-enzyme	mRNA-capping-enzyme	357.1		0	32379		0	1274820		0	660879		0	414001
CG13197	CG13197	357.2		0	36253		0	1270774		0	NA		0	NA
CG9413	CG9413	358.1		0	32397		0	1281252		0	660811		0	409932
CG9413	CG9413	358.2		0	32397		0	1276337		0	660467		0	410296
JhI-21	JhI-21	358.3		0	34624		0	NW_045808.1!650022!650225+1269049		0	662259		0	NA
minidiscs	mnd	358.4		0	39625		0	1278313		0	659247		0	411935
genderblind	gb	358.5		0	43265		0	1272799		0	663903		0	NA
CG1607	CG1607	358.6		0	43707		0	1281545		0	660956		0	411772
CG5334	CG5334	359.1	(1,2);	1	32402		0	NA		0	NA		0	NA
CG5347	CG5347	359.2		2	32403		0	1280980		0	NA		0	NA
makorin 1	Mkrn1	359.3		0	44131		0	1271902		0	656720		0	725397
rutabaga	rut	360.1		0	32406		0	1272318		0	661438		0	NA
adenylyl cyclase 35C	Ac13E	360.2		0	32485		0	1272181		0	663450		0	552535
Ac3	Ac3	360.3		0	35419		0	4578014		0	657568		0	408363
CG42513	CG42513	360.4		0	39835		0	1272957		0	659486		0	726514
adenylyl cyclase 76E	Ac76E	360.5		0	40180		0	1272602		0	660468+660403		0	552216
adenylyl cyclase 78C	Ac78C	360.6		0	40333		0	1269297		0	655273		0	726262
CG14411	CG14411	361.1		0	32408		0	1279698		0	658337		0	410106
SET domain binding factor	Sbf	361.2		0	41427		0	1275043		0	659622		0	410887
CG14407	CG14407	362.1		0	32410		0	1273462		0	664283		0	552835
CG6523	CG6523	362.2		0	34745		0	1272788		0	661197		0	409355
CG9518	CG9518	363.1		0	32416		0	3290903		0	661216		0	410744
CG6142	CG6142	363.2		0	43178	(1,2);	1	1273413,1273414		0	657901		0	NA
CG9517	CG9517	363.3		0	32417		0	1271522		0	661158		0	410745
CG9514	CG9514	363.4		0	32418		0	3290902		0	661056		0	552457
CG9503	CG9503	363.5		0	32424		0	1271525		0	660830		0	410748
glucose dehydrogenase	Gld	363.6		0	40875		0	1273408	((1,2),3);	3	655686,656559,656885	((1,2),3);	3	411405,406081,551044
flotillin 2	Flo-2	364.1		0	32425		0	1271526		0	660777		0	726243
flotillin	Flo	364.2		0	36726		0	1269732		0	660557		0	551337
CG9009	CG9009	365.1		0	32426		0	1273249	(((10,11),((12,13),14)),15);	14	655438,655436,655270,655197,655052,655519		0	726040
CG6178	CG6178	365.2		0	42867	(1,2);	1	3290850,1277297	((((((1,2),3),4),5),((6,7),8)),9);	9	662698,662883,655211,655951,662911,662210,655287,656890,656466	(1,2);	1	726625,411105
ether a go-go	eag	366.1		0	32428		0	1273247		0	663617		0	552834
eag-like K[+] channel	elk	366.2		0	37047		0	1274964		0	655892		0	GB12249
seizure	sei	366.3		0	37843		0	1269513		0	662676		0	410498
doppelganger von brummer	dob	367.1	(1,2);	1	32436		0	NA		0	NA		0	NA
brummer	bmm	367.2		2	39611		0	1280743		0	659311		0	724403+551055
rab3-GEF	rab3-GEF	368.1		0	32442		0	1272439		0	663968		0	727374+552179
CG7852	CG7852	368.2		0	38178		0	1270589		0	TC007707		0	412128
ribosomal protein L37a	RpL37a	369.1		0	32446		0	1270447		0	658148		0	552494
ribosomal protein L37b	RpL37b	369.2		0	37669		0	1278237		0	NA		0	NA
CG5662	CG5662	370.1	(1,2);	1	32450		0	NA		0	NA		0	NA
CG8004	CG8004	370.2		2	40178		0	1277812		0	663155		0	726364
protein phosphatase Y regulator 1	PPYR1	371.1	(((1,2),3),4);	4	32453		0	NA		0	NA		0	NA
vasa intronic gene	vig	371.2		3	34885		0	NT_078266!4072653!4073213		0	TC001877		0	409410
vig2	vig2	371.3		1	43016		0	NA		0	NA		0	NA
CG41503	CG41503	371.4		2	8674077		0	NA		0	NA		0	NA
CG9123	CG9123	372.1	(1,2);	1	32462		0	NA		0	NA		0	NA
CG12608	CG12608	372.2		2	32463		0	1282017		0	656500		0	411845
CG6227	CG6227	373.1		0	32464		0	1272463		0	661902		0	727008
CG6418	CG6418	373.2		0	39218		0	1267690		0	663107		0	551822
CNG channel-like	cngl	374.1		0	32468		0	1275026		0	655777		0	GB19445
Cyclic-nucleotide-gated ion channel protein	Cng	374.2		0	36806		0	1280008		0	655749		0	NA
CG17922	CG17922	374.3		0	37479		0	3291342		0	655603		0	NA
CG42260	CG42260	374.4		0	37614		0	4576205		0	656479		0	408865
adenosylhomocysteinase at 13	Ahcy13	375.1		0	32471		0	1272312		0	656766		0	408368
CG9977	CG9977	375.2	(1,2);	1	38342		0	1272386		0	TC001438		0	551762
adenosylhomocysteinase 89E	Ahcy89E	375.3		2	42043		0	NA		0	NA		0	NA
CG11655	CG11655	376.1	(1,2);	1	32472		0	3290666		0	662280		0	NA
CG9903	CG9903	376.2		2	32621		0	NA		0	NA		0	NA
CG7860	CG7860	377.1		0	32488		0	1270829	((1,2),3);	1	663088,662650,662684		0	GB30042
taspase 1	Taspase1	377.2		0	39757		0	1273431		0	661870		0	552236
CG9220	CG9220	378.1		0	32497		0	1270501		0	656073		0	413549
CG12913	CG12913	378.2		0	36079		0	1269523		0	659298		0	NA
CG8117	CG8117	379.1	(1,2);	1	32499		0	NA		0	NA		0	NA
RNA polymerase II elongation factor	TfIIS	379.2		2	34883		0	1279994		0	655130		0	410020
CG9240	CG9240	380.1		0	32505		0	3290502		0	659005		0	NA
CG11110	CG11110	380.2		0	37337		0	1269784		0	661039		0	GB18638
CG8184	CG8184	381.1		0	32510		0	NA		0	657452		0	724894
suppressor of deltex	Su(dx)	381.2		0	33379		0	1280030		0	662990		0	GB12906
lethal with a checkpoint kinase	lack	381.3		0	36999		0	1270684		0	661188		0	412866
Nedd4	Nedd4	381.4		0	39958		0	1272379,1273805		0	663811		0	411723
CG12379	CG12379	382.1	(1,2);	1	32512		0	1276078		0	TC030565		0	GB14463
CG8206	CG8206	382.2		2	32516		0	NA		0	NA		0	NA
CG8959	CG8959	383.1		0	32528		0	NA		0	NA		0	NA
CG11048	CG11048	383.2		0	37284		0	1271542,1275015		0	663124,661506		0	412641,551814
CG8509	CG8509	384.1	((1,2),3);	1	32535		0	NA		0	NA		0	NA
phosphotyrosyl phosphatase activator	Ptpa	384.2		3	33555		0	1275501		0	657883		0	409443+725989
CG2104	CG2104	384.3		2	40702		0	NA		0	NA		0	NA
CG8565	CG8565	385.1	((1,2),3);	1	32538		0	NA		0	656905		0	NA
SRPK	SRPK	385.2		3	36706		0	1276029		0	NA		0	724672
CG11489	CG11489	385.3		2	40461		0	NA		0	NA		0	NA
Myb oncogene-like	Myb	386.1		0	32543		0	1277801		0	664494		0	409733
CG6905	CG6905	386.2		0	38062		0	1273009		0	658182		0	552527
glyceraldehyde 3 phosphate dehydrogenase 2	Gapdh2	387.1	(1,2);	1	32545		0	1278999		0	663023		0	410122
glyceraldehyde 3 phosphate dehydrogenase 1	Gapdh1	387.2		2	35728		0	NA		0	NA		0	NA
CG9010	CG9010	387.3		0	36904		0	NA		0	663815		0	413924
membrane steroid binding protein	MSBP	388.1	(1,2);	1	32548		0	1272357		0	664561		0	413164
CG16957	CG16957	388.2		2	34755		0	NA		0	NA		0	NA
CG8909	CG8909	389.1		0	32552		0	1272241		0	663741		0	NA
arrow	arr	389.2		0	44279		0	1280870		0	664383		0	724394+551021
CG8916	CG8916	390.1		0	32553		0	NW_045719.1!9938653!9939420		0	663766,659976		0	726970
Ligand-gated chloride channel homolog 3	Lcch3	390.2		0	32554		0	1272239		0	663754		0	412740
resistant to dieldrin	Rdl	390.3		0	39054		0	1276697		0	657296		0	406124
glycine receptor	Grd	390.4		0	39984		0	1270594		0	NA		0	413803
GluClalpha	GluClalpha	390.5		0	42350		0	4577187		0	662174		0	408450
mind-meld	mmd	391.1		0	32561		0	1270470		0	663217		0	551663
Neu3	Neu3	391.2		0	3772109	(1,2);	1	1270931,1270932		0	654954		0	GB30034
CG8931	CG8931	392.1	(1,2);	1	32564		0	1273264		0	659293		0	411142
CG5755	CG5755	392.2		2	35081		0	NA		0	NA		0	NA
CG9172	CG9172	393.1		0	32565		0	1272093,1273905		0	655771,655618		0	408909
CG2014	CG2014	393.2		0	43477		0	NA		0	NA		0	NA
CG8939	CG8939	394.1		0	32568		0	1272952		0	660067		0	408348
CG5220	CG5220	394.2	(1,2);	1	42056		0	1278793		0	664604		0	408687
CG7009	CG7009	394.3		2	42508		0	NA		0	NA		0	NA
vacuolar peduncle	vap	395.1		0	32569		0	1273239		0	655394		0	410811
GTPase-activating protein 1	Gap1	395.2		0	39158		0	1269298		0	655526		0	412003
CG12698	CG12698	396.1	((1,2),3);	1	32570		0	NA		0	NA		0	NA
CG8958	CG8958	396.2		2	32575		0	NA		0	NA		0	551443
CG14693	CG14693	396.3		3	41299	(1,2);	1	1268643,4576127		0	TC013360		0	NA
CG12395	CG12395	397.1	(1,2);	1	32571		0	1277578		0	658313	(1,2);	1	726532,GB12610
CG16719	CG16719	397.2		2	39131		0	NA		0	NA		0	NA
disconnected	disco	398.1	(1,2);	1	32579		0	NA		0	NA		0	725257
disco-related	disco-r	398.2		2	64875		0	1282060		0	660322		0	NA
CG3415	CG3415	399.1		0	32582		0	1275515		0	663655		0	409986
CG5590	CG5590	399.2		0	43325	(1,2);	1	1269060,1269063		0	659736		0	552717
proteasome 28kD subunit 1	Pros28.1	400.1	((1,2),3);	1	32584		0	1276122		0	657572		0	410095
proteasome alpha5 subunit	Prosalpha5	400.2		0	36951		0	1275676		0	661893		0	551956
proteasome 28kD subunit 1B	Pros28.1B	400.3		3	37910		0	NA		0	NA		0	NA
proteasome 25kD subunit	Pros25	400.4		0	41531		0	1281126		0	657161		0	409802
proteasome 28kD subunit 1A	Pros28.1A	400.5		2	42457		0	NA		0	NA		0	NA
CG3560	CG3560	401.1	(1,2);	1	32586		0	NA		0	NA		0	NA
CG17856	CG17856	401.2		2	43369		0	1280500		0	664078	(1,2);	1	551757,725702
cabeza	caz	402.1	(1,2);	1	32587		0	1281527		0	658894		0	552303
CG14718	CG14718	402.2		2	41413		0	NA		0	NA		0	NA
CG9911	CG9911	403.1	(1,2);	1	32588		0	1277423		0	659817		0	552191
CG10029	CG10029	403.2		2	40883		0	NA		0	NA		0	NA
CG3632	CG3632	404.1		0	32589		0	1281570		0	657269		0	413663
myotubularin	mtm	404.2		0	33845		0	4578166		0	663698		0	411563
CG3530	CG3530	404.3		0	37707		0	1276048		0	662636		0	727030
CG5026	CG5026	404.4		0	39026		0	1269171		0	658578		0	412880
CG9914	CG9914	405.1	(1,2);	1	32592		0	1269804		0	656318		0	406119
CG10131	CG10131	405.2		2	36624		0	NA		0	NA		0	NA
U2 small nuclear riboprotein auxiliary factor 50	U2af50	406.1	(1,2);	1	32602		0	1273053		0	663317		0	550656
CG3162	CG3162	406.2		2	37681		0	NA		0	NA		0	NA
no on or off transient A	nonA	407.1	((1,2),3);	2	32603		0	1271533	(1,2);	1	659351,658143		0	726178
CG12460	CG12460	407.2		1	3355078		0	NA		0	NA		0	NA
nonA-like	nonA-l	407.3		3	42026		0	NA		0	NA		0	NA
furin 2	Fur2	408.1		0	32604		0	1273048		0	657778		0	GB17448
amontillado	amon	408.2		0	43215		0	1269379		0	661336		0	408835
furin 1	Fur1	408.3		0	47220		0	1281848		0	661907		0	725466
CG33298	CG33298	409.1		0	2768929		0	1279454		0	656757		0	409192
CG9981	CG9981	409.2	(1,2);	1	32609		0	NA		0	NA		0	GB17812
CG4301	CG4301	409.3		2	32610		0	1271858		0	NA		0	NA
CG31729	CG31729	409.4		0	34736		0	1277786		0	655986		0	413138
CG42321	CG42321	409.5		0	36488		0	1278339	(1,2);	1	658562,663307		0	552074
CG14741	CG14741	409.6		0	41469		0	1273317		0	NA		0	413328
TNF-receptor-associated factor-like	Traf-like	410.1		0	32611		0	1271862		0	661542		0	NW_001253665!8621!9919
TNF-receptor-associated factor 4	Traf4	410.2		0	33638		0	1279446		0	655880		0	408754
annexin X	AnnX	411.1	(1,2);	1	33019	((1,2),3);	3	3290887,1271454,1271453	(1,2);	1	661404,662891		0	409068
annexin B11	Anxb11	411.2		2	32612		0	NA		2	NA		0	NA
annexin IX	AnnIX	411.3		0	42492		0	1271530		0	656298		0	409533
rumi	rumi	412.1	(1,2);	1	326122		0	4576887		0	657023		0	NA
rumi	rumi	412.2		0	326122		0	NA		0	657489		0	552603
CG31139	CG31139	412.3		2	42698		0	NA		0	NA		0	NA
CG31477	CG31477	413.1	(1,2);	1	326144		0	NA		0	NA		0	NA
stunted	sun	413.2		2	44046	((1,2),3);	3	1274773,1278926,1271996		0	658713		0	727483
CG31650	CG31650	414.1		0	326150		0	1279611		0	659171		0	410216
supercoiling factor	scf	414.2		0	38145		0	1272654		0	663850		0	411647
neither inactivation nor afterpotential D	ninaD	415.1	((1,2),3);	1	326160		0	NA		0	NA		0	NA
croquemort	crq	415.2		3	33219		0	1279553		0	664559		0	NA
CG31741	CG31741	415.3		2	35079		0	NA		0	NA		0	NA
CG31860	CG31860	416.1	((1,2),3);	1	326167		0	1279965	(1,2);	1	655654,663791		0	552208
ZnT35C	ZnT35C	416.2		2	34890		0	NA		0	NA		0	NA
CG11163	CG11163	416.3		3	35513		0	NA		0	NA		0	NA
CG31937	CG31937	417.1		0	326177		0	1272498		0	661584		0	411863
CG7601	CG7601	417.2		0	43502		0	1276215		0	100142524		0	410952
keren	Krn	418.1	(1,2);	1	326198		0	1279733+4397777		0	100141824		0	GB19294
spitz	spi	418.2		2	35253		0	NA		0	NA		0	NA
CG32238	CG32238	419.1	(1,2);	1	326203		0	1272706		0	663328	(1,2);	1	409770,413973
CG8918	CG8918	419.2		2	32704		0	NA		0	NA		0	NA
CG32344	CG32344	420.1		0	326208		0	1269717		0	TC011242		0	413660
CG9253	CG9253	420.2		0	35379		0	1279222		0	658296		0	412190
DEAD box protein 45A	Dbp45A	420.3		0	35917		0	1274808		0	TC007723		0	725441
Rs1	Rs1	420.4		0	44087		0	1270844		0	656951		0	726537
CG32351	CG32351	421.1	(1,2);	1	326209		0	1281173		0	NA		0	GB30492
CG6372	CG6372	421.2		2	38986		0	NA		0	661414		0	NA
CG32488	CG32488	422.1	(((1,2),3),(4,5));	1	326220		0	NA		0	NA		0	NA
CG11291	CG11291	422.2		2	37541		0	NA		0	NA		0	NA
CG32487	CG32487	422.3		3	38358		0	NA		0	NA		0	NA
CG5577	CG5577	422.4		4	39985		0	NA		0	NA		0	NA
CG5567	CG5567	422.5		5	39986		0	1270590		0	663527		0	410071
CG32557	CG32557	423.1	((1,2),3);	1	326221		0	NA		0	NA		0	NA
CG3759	CG3759	423.2		3	34258		0	1271472		0	641591		0	724890
CG42345	CG42345	423.3		0	35494		0	1276845		0	641461		0	410365
CG42345	CG42345	423.4		0	35494		0	1275582		0	NA		0	552811
CG5959	CG5959	423.5		2	43134		0	NA		0	NA		0	NA
CG42345	CG42345	423.6		0	35494			1276851			655485			414002
CG32669	CG32669	424.1	(1,2);	1	326229		0	NA		0	NA		0	NA
CG10444	CG10444	424.2		2	37294		0	1274035		0	662639	((1,2),3);	1	413556,409899,410454
CG5687	CG5687	424.3		0	38255		0	1276460		0	662604		0	726464
transport and golgi organization 5	Tango5	425.1	(1,2);	1	326232		0	1278597		0	658051		0	551036
CG32087	CG32087	425.2		2	39323		0	NA		0	NA		0	NA
Ubiquitin-5E	Ubi-p5E	426.1	(1,2);	1	326237		0	NA		0	NA		0	NA
ribosomal protein L40	RpL40	426.2		0	33629		0	1278028		0	656930		0	725943
ribosomal protein S27A	RpS27A	426.3		0	34420		0	NT_078268!3990469!3990612		0	657472		0	413884
Nedd8	Nedd8	426.4		0	35151		0	1278045		0	661681		0	552822
Ubiquitin-63E	Ubi-p63E	426.5		2	38456		0	1273370		0	641546	(1,2);	1	412353,409675
protein phosphatase 2B at 14D	Pp2B-14D	427.1	((1,2),3);	1	32624		0	1281899		0	657135		0	411046
calcineurin A1	CanA1	427.2		3	43670		0	NA		0	NA		0	NA
calcineurin A at 14F	CanA-14F	427.3		2	8674098		0	NA		0	NA		0	NA
CG33056	CG33056	428.1	((1,2),3);	3	326246		0	NA		0	NA		0	NA
CG33054	CG33054	428.2		1	40340		0	1273365		0	661444		0	NA
CG34261	CG34261	428.3		2	5740205		0	NA		0	NA		0	NA
CG33092	CG33092	429.1	((1,2),3);	1	32625		0	NA		0	NA		0	NA
CG6661	CG6661	429.2		2	39556		0	NA		0	NA		0	NA
CG7145	CG7145	429.3		3	40434		0	1274512		0	657887		0	551113
CG33116	CG33116	430.1	(1,2);	1	326259		0	1279849		0	663101		0	411698
CG7149	CG7149	430.2		0	34063		0	1275480		0	NA		0	NA
CG40928	CG40928	430.3		2	5740707		0	NA		0	NA		0	NA
CG9784	CG9784	431.1	(1,2);	1	32629		0	1280991		0	659746		0	408730
CG6805	CG6805	431.2		2	36911		0	NA		0	NA		0	NA
ribosomal protein S19a	RpS19a	432.1	(1,2);	1	32635		0	1271018		0	663562		0	410024
ribosomal protein S19b	RpS19b	432.2		2	42830		0	NA		0	NA		0	NA
septin 4	Sep4	433.1		0	32646		0	1272359		0	655956		0	412647
Septin-1	Sep1	433.2		0	33114		0	1273316		0	659325		0	412180
peanut	pnut	433.3		0	35801		0	1269634		0	656651		0	725834
CG32568	CG32568	434.1	(1,2);	1	32659		0	NA		0	NA		0	NA
PP2A-B'	PP2A-B'	434.2		0	42169		0	NW_001953045.1!12006648!12007079		0	664455		0	408949
widerborst	wdb	434.3		2	43312		0	1274016		0	659798		0	551258
CG4928	CG4928	435.1		0	32682		0	1277346		0	656709		0	413134
CG2121	CG2121	435.2		0	35814		0	1280361		0	NA		0	410465
CG9059	CG9059	436.1		0	32688		0	1277361		0	664176		0	NA
CG40072	CG17684	436.2		0	3355066		0	1274856		0	663947		0	GB11365
CG11319	CG11319	436.3		0	33923		0	1275619		0	664602		0	552477
Arpc3B	Arpc3B	437.1	(1,2);	1	32696		0	NA		0	NA		0	NA
Arpc3A	Arpc3A	437.2		2	41917		0	1281462		0	662851		0	725678
ribosomal protein S5a	RpS5a	438.1	(1,2);	1	32700		0	1277655		0	655921		0	409728
ribosomal protein S5b	RpS5b	438.2		2	41807		0	NA		0	NA		0	NA
CG1582	CG1582	439.1	(1,2);	1	32021		0	1269336		0	657645		0	NA
CG8915	CG8915	439.2		2	32715		0	NA		0	NA		0	NA
CG9323	CG9323	439.3		0	35339		0	1277741		0	664152		0	411492
maleless	mle	439.4		0	35523		0	1277182		0	662250		0	413074
spindle E	spn-E	439.5		0	41919		0	1273132		0	660417		0	727113
presidents-cup	p-cup	440.1	((1,2),(3,4),5);	5	32727		0	NA		0	NA		0	NA
ryder cup	r-cup	440.2		1	33075		0	NA		0	NA		0	GB14196
CG15128	CG15128	440.3		3	37263		0	NA		0	NA		0	NA
CG7634	CG7634	440.4		4	40394		0	1274061		0	100141975		0	NA
walker cup	wa-cup	440.5		2	40892		0	NA		0	NA		0	NA
CG8557	CG8557	441.1		0	32729		0	NC_004818!8705675!8706928		0	657517		0	413677
sunday driver	syd	441.2		0	43905		0	1274858		0	662182	(1,2);	1	413073,727395
CG5703	CG5703	442.1	(1,2);	1	32740		0	1269384		0	657790		0	409793
CG6485	CG6485	442.2		2	39926		0	NA		0	NA		0	NA
CG42270	CG42270	443.1		0	32754		0	4576599		0	NA		0	724344
neurofibromin 1	Nf1	443.2		0	43149		0	1273814		0	TC004756+TC004757		0	552370
unc-4	unc-4	444.1	(1,2);	1	32757		0	4577217		0	657741		0	408443
Ods-site homeobox	OdsH	444.2		2	32758		0	NA		0	NA		0	NA
suppressor of cytokine signaling at 16D	Socs16D	445.1		0	32760		0	1277396		0	662537	(1,2);	1	413772,GB13951
suppressor of cytokine signaling at 36E	Socs36E	445.2		0	35085		0	1269453		0	TC003596		0	552036
suppressor of cytokine signaling at 44A	Socs44A	445.3		0	35786		0	5667355		0	TC003320		0	552150
CG8142	CG8142	446.1		0	32763		0	1273769		0	663583		0	726018
replication factor C subunit 3	RfC3	446.2		0	34423		0	1274822		0	NC_007423!14924422!14924931		0	410266
replication factor C subunit 4	RfC4	446.3		0	38492		0	1269746		0	656317		0	551540
Ucp4A	Ucp4A	447.1	((1,2),3);	3	32764	(1,2);	1	1278976,1280964		0	658449		0	NA
Ucp4C	Ucp4C	447.2		1	33832		0	NA		0	NA		0	NA
Ucp4B	Ucp4B	447.3		2	33833		0	NA		0	NA		0	NA
bmcp	Bmcp	447.4		0	39322		0	1280811		0	658125		0	413711
ariadne	ari-1	448.1	(1,2);	1	32796		0	1271056	(1,2);	1	660216,656643		0	413468
ariadne 2	ari-2	448.2		0	37542		0	1276650		0	660009		0	552264
CG12362	CG12362	448.3		2	39193		0	NA		0	NA		0	NA
frequenin 1	Frq1	449.1	(1,2);	1	32797		0	NA		0	NA		0	NA
frequenin 2	Frq2	449.2		2	32799		0	NW_045828.1!590667!590831		0	656079		0	551385
neurocalcin	Nca	449.3		0	40186		0	1269899		0	657840		0	408721
HES-related	Her	450.1	(((((1,2),3),4),5),6);	6	32800		0	NA		0	NA		0	NA
E(spl) region transcript mdelta	HLHmdelta	450.2		1	43150		0	NA		0	NA		0	NA
E(spl) region transcript mgamma	HLHmgamma	450.3		2	43151		0	1280363		0	661436		0	409822
E(spl) region transcript mbeta	HLHmbeta	450.4		3	43152		0	NA		0	NA		0	NA
E(spl) region transcript m3	HLHm3	450.5		4	43156		0	NA		0	NA		0	NA
E(spl) region transcript m7	HLHm7	450.6		5	43160		0	NA		0	NA		0	NA
CG6361	CG6361	451.1	(1,2);	1	32831		0	1271651		0	663186		0	NA
persephone	psh	451.2		2	32832		0	NA		0	NA		0	NA
Lim1	Lim1	452.1		0	31813		0	1270792		0	657972		0	GB12408
CG4328	CG4328	452.2		0	39405		0	1274816		0	655506		0	NA
CG32105	CG32105	452.3		0	39406		0	3289904		0	655586		0	724778
Lim1	Lim1	452.4		0	31813		0	1272655		0	664264		0	410866
beadex	Bx	452.5		0	32846		0	1272320		0	663863		0	724851
CG5708	CG5708	452.6		0	34361		0	3291599+1278120		0	661046		0	413125
tailup	tup	452.7		0	35147		0	1279631		0	662583		0	GB12465
Lim3	Lim3	452.8		0	35184		0	1280042		0	662120		0	410658
apterous	ap	452.9		0	35509		0	1279943+3291866		0	658656		0	409095
apterous	ap	452.10		0	35509		0	1279942		0	658719		0	726415
arrowhead	Awh	452.11		0	38451	((1,2),3);	3	4576611,1277135,1277139		0	659841	(1,2);	1	725532,725574
CG6617	CG6617	453.1		0	32852		0	1270446		0	660768		0	409454
CG18467	CG18467	453.2		0	36958		0	NW_001953044.1		0	NA		0	NA
Ing3	Ing3	454.1		0	32853		0	1271697		0	658488		0	GB16484
CG9293	CG9293	454.2		0	34752		0	1279415		0	657854		0	551029
misexpression suppressor of ras 4	MESR4	454.3		0	36986		0	1280784		0	100142044		0	GB12843
CG7379	CG7379	454.4		0	42140		0	1281805		0	659310		0	411044
phantom	phm	455.1		0	32857		0	1278717		0	656884		0	408398
cytochrome P450-18a1	Cyp18a1	455.2		0	32858		0	NA		0	656794		0	410405
CCK-like receptor at 17D1	CCKLR-17D1	456.1	(1,2);	1	32860		0	1270512	(1,2);	1	661502,664118		0	GB18786
CCK-like receptor at 17D3	CCKLR-17D3	456.2		2	32864		0	NA		0	NA		0	NA
CG6873	CG6873	457.1	(1,2);	1	32861		0	NA		0	NA		0	NA
twinstar	tsr	457.2		2	37841		0	1280611		0	656560		0	725718
CG18259	CG18259	458.1	(1,2);	1	32866		0	NA		0	657843		0	GB19773
CG6961	CG6961	458.2		2	32869		0	4576120		0	NA		0	NA
CG7349	CG7349	459.1		0	32887		0	NA		0	NA		0	NA
succinate dehydrogenase B	SdhB	459.2		0	35590		0	1269860		0	663097,658066		0	727212,551169
CG7990	CG7990	460.1		0	32909		0	1271732		0	658997		0	410754
CG3876	CG3876	460.2		0	33258		0	1278086		0	663467		0	408784
CG14196	CG14196	461.1	((1,2),3);	3	32915		0	1272311	((1,2),3);	0	660929,660874(1~909aa),660874(910~1268aa),660594		0	724684,GB19401
CG8051	CG8051	461.2		1	32925		0	NA		0	NA		0	NA
outsiders	out	461.3		2	32926		0	NA		0	NA		0	NA
heparan sulfate 3-O sulfotransferase-B	Hs3st-B	462.1		0	32918		0	1271822		0	662715		0	413133
heparan sulfate 3-O sulfotransferase-A	Hs3st-A	462.2		0	37161		0	1276837		0	660198		0	412956
sulfateless	sfl	462.3		0	38736		0	1276942		0	657258		0	413242
CG8028	CG8028	463.1		0	32923		0	1273384		0	100141623		0	408272
CG8034	CG8034	463.2		0	32924		0	1272310		0	658985		0	NA
CG8389	CG8389	463.3		0	36764		0	1269628		0	660985		0	410179
giant fibre A	gfA	464.1		0	32928		0	1270457		0	658167		0	NA
nicotinic acetylcholine receptor alpha 30D	nAcRalpha-30D	464.2		0	34304		0	1269406		0	655525		0	551010
nicotinic acetylcholine receptor alpha 34E	nAcRalpha-34E	464.3		0	34826		0	1275447		0	NA		0	406148
kekkon5	kek5	465.1	(1,2);	1	32930		0	1273631		0	664293		0	411158
kekkon4	kek4	465.2		2	34718		0	NA		0	NA		0	NA
CG7896	CG7896	465.3		0	43552	((((1,2),3),4),5);	5	1270408,1275133,5666869,3290298,3290297		0	657316		0	725434
kek6	kek6	465.4		0	43729		0	1271792		0	662901		0	413384
pacman	pcm	466.1		0	32935		0	1274572		0	663618		0	409993
Rat1	Rat1	466.2		0	33964		0	1270887		0	662556		0	408840
CG12231	CG12231	467.1	(1,2);	1	32942		0	NA		0	NA		0	NA
CG7222	CG7222	467.2		2	36138		0	1280608		0	655999		0	550664
ribosomal protein S10b	RpS10b	468.1	(1,2);	1	32953		0	1272330		0	662284		0	409552
ribosomal protein S10a	RpS10a	468.2		2	43321		0	NA		0	NA		0	NA
CG14212	CG14212	469.1	(1,2);	1	32964		0	NA		0	NA		0	NA
CG12237	CG12237	469.2		2	32967		0	1273119		0	100141932		0	725365
enhancer of yellow 3	e(y)3	470.1		0	32965		0	1281246		0	656013		0	NA
d4	d4	470.2		0	35485		0	1274933		0	655725		0	411629
CG5591	CG5591	470.3		0	37795		0	NW_001953042.1!10339882!10342683		0	NA		0	GB12881
CG14213	CG14213	471.1	((1,2),3);	1	32966		0	1280619		0	662846		0	412388
CG9573	CG9573	471.2		2	34229		0	NA		0	NA		0	NA
CG2053	CG2053	471.3		3	43762		0	NA		0	NA		0	NA
Sec61gamma	Sec61gamma	472.1	((1,2),3);	3	32968		0	NA		0	664530		0	726721
CG8860	CG8860	472.2		1	36310		0	NA		0	NA		0	NA
CG13426	CG13426	472.3		2	37312		0	NA		0	NA		0	NA
zwischenferment	Zw	473.1	(1,2);	1	32974		0	1272457		0	662934		0	725325
CG7140	CG7140	473.2		2	40445		0	NA		0	NA		0	NA
CG14231	CG14231	474.1		0	32982		0	1274923		0	663688		0	413534
CG4933	CG4933	474.2		0	39811		0	1270132		0	660321		0	411654
CG12703	CG12703	475.1		0	32992		0	1271802		0	660313		0	552495
CG2316	CG2316	475.2		0	43772		0	1281041		0	659858		0	411685
CG17003	CG17003	476.1	(1,2);	1	33006		0	NA		0	NA		0	NA
CG3967	CG3967	476.2		2	39086		0	1276496		0	660866		0	726664
CG9576	CG9576	477.1		0	33015		0	1273033		0	NA		0	551374
pineapple eye	pie	477.2		0	44315		0	1280868		0	NA		0	NA
obstructor-A	obst-A	478.1		0	33022	((1,2),3);	3	1270484,1270483,3289801	(1,2);	1	660027,660092		0	724382
obstructor-E	obst-E	478.2		0	33806		0	1271310		0	661032		0	413679
obstructor-B	obst-B	478.3		0	34336		0	1279202		0	660157		0	408726
gasp	Gasp	478.4		0	40745		0	1279776		0	663263		0	725932
CG17068	CG17068	479.1		0	33024		0	NA		0	663586		0	408635
CG5319	CG5319	479.2		0	42089		0	1274078		0	TC009240	(1,2);	1	413971,GB15449
innexin 2	inx2	480.1		0	31646		0	1281682		0	657243		0	724832
innexin 7	inx7	480.2		0	33027		0	1281697	((1,2),3);	3	657166,657000,657081		0	552285
shaking B	shakB	480.3		0	33062		0	4577242		0	656737		0	413472
innexin 3	inx3	480.4		0	44266		0	1274656		0	100141896		0	551165
optic ganglion reduced	ogre	480.5		0	45382		0	1281698		0	656913		0	725480
CG15450	CG15450	481.1	(1,2);	1	33064		0	NA		0	NA		0	NA
CG3209	CG3209	481.2		2	37852		0	1281256		0	657546		0	409270
lethal (1) 19Ec	l(1)19Ec	482.1	(1,2);	1	33068		0	NA		0	NA		0	NA
CG13994	CG13994	482.2		2	33853		0	NT_078268!48124608!48124961		0	100141846		0	GB10838
NPC1b	NPC1b	483.1		0	33072		0	1271641		0	NA		0	NA
Niemann-Pick type C-1a	Npc1a	483.2		0	34358		0	1277820		0	655972,655554		0	408992,552375
nuclear transport factor-2	Ntf-2	484.1	(1,2);	1	33078	(1,2);	1	1271742,1270081		0	662356		0	409406
nuclear transport factor-2-related	Ntf-2r	484.2		2	35101		0	NA		0	NA		0	NA
rasputin	rin	484.3		0	47998		0	1271843+5666791		0	664361		0	551602
CG1518	CG1518	485.1		0	33082		0	1271811		0	TC010433		0	409265
oligosaccharyl transferase 3	OstStt3	485.2		0	43005		0	1273566		0	661059		0	NC_007074!7451828!7454206
CG1503	CG1503	486.1	(1,2);	1	33090		0	NA		0	NA		0	NA
deneddylase 1	Den1	486.2		2	36339		0	1270619		0	656873		0	726605
CG1724	CG1724	487.1	(((1,2),3),4);	1	33097		0	NA		0	NA		0	NA
CG40451	CG40451	487.2		4	3355107		0	1277310		0	659840	(1,2);	1	413799,724906
Tim17b1	Tim17b1	487.3		3	40635		0	NA		0	NA		0	NA
translocase inner membrane 17	Tim17b2	487.4		2	44381		0	NA		0	NA		0	NA
CG2658	CG2658	488.1		0	31253		0	1271665		0	100142134		0	410289
Pros45	Pros45	488.2	(1,2);	1	33105		0	1269903		0	661287		0	550794
CG4908	CG4908	488.3		0	34360		0	1274111		0	660477		0	552253
Rpt1	Rpt1	488.4		0	35701		0	1270756		0	661114		0	551343
CG3499	CG3499	488.5		0	37636		0	1279395		0	658809		0	409178
CG6512	CG6512	488.6		0	39922		0	1270135		0	657563		0	552166
Rpt6R	Rpt6R	488.7		2	43635		0	NA		0	NA		0	NA
lethal (1) G0269	l(1)G0269	489.1		0	33107		0	1276892		0	661904		0	408417
CG8584	CG8584	489.2	(1,2);	1	35856		0	NA		0	NA		0	NA
CG12078	CG12078	489.3		2	38401		0	NA		0	NA		0	NA
CG5830	CG5830	489.4		0	39748		0	1278272		0	100141993		0	551591
CG5830	CG5830	489.5		0	39748		0	1275779		0	662199		0	411972
CG3040	CG3040	490.1		0	31642		0	1281680		0	662286		0	726043
scribbled	scrib	490.2		0	44448		0	1272222		0	TC011397		0	413669
CG32687	CG32687	490.3		0	31980		0	1274604	(1,2);	1	664305,100142297		0	411291
flightless I	fliI	490.4		0	33110		0	1270641		0	656702		0	GB17424
CG16974	CG16974	490.5		0	34713		0	1275458		0	664337		0	410825
icarus	ics	490.6		0	34774		0	1275645		0	656490		0	412148
CG6860	CG6860	490.7		0	35041		0	1279439		0	661838		0	409027
Lap1	Lap1	490.8		0	36670		0	NA		0	660631		0	410256
Sur-8	Sur-8	490.9		0	42093		0	1274632(1..116aa)+NW_045763.1!2698704!2699132+1274632(117aa..end)		0	656574		0	412562
chitin deacetylase-like 4	Cda4	491.1		0	33144		0	1271898		0	658721		0	725813
chitin deacetylase-like 5	Cda5	491.2		0	33158		0	1277459		0	656801		0	552276
ChLD3	ChLD3	491.3		0	35002		0	1277832		0	658524		0	725391
vermiform	verm	491.4		0	40149		0	1280732		0	657879		0	551323
serpentine	serp	491.5		0	40150		0	1280733		0	657802		0	408365
CG12446	CG12446	492.1	(1,2);	1	33147		0	NA		0	NA		0	NA
CG7384	CG7384	492.2		2	34447		0	1279848		0	NA		0	NA
CG34109	CG34109	492.3		0	4379890		0	1279207		0	NA		0	410247
galectin	galectin	493.1	(1,2);	1	33162		0	1279807		0	660408		0	725222
CG11374	CG11374	493.2		2	33163	(((1,2),3),4);	4	1270644,1278417,1278416,1275208		0	100141926		0	408848
CG11376	CG11376	494.1		0	33165		0	1279612		0	658038		0	411245
CG42533	CG42533	494.2		0	34030		0	4578347+NW_001953044.1!10780862!10781743		0	TC013407		0	410777
Na[+]/H[+] hydrogen exchanger 1	Nhe1	495.1		0	33167		0	1269244		0	100141996		0	414012
Na[+]/H[+] hydrogen exchanger 3	Nhe3	495.2		0	33939		0	1275569		0	661189		0	552330
Na[+]/H[+] hydrogen exchanger 2	Nhe2	495.3		0	35376		0	1279995		0	659773		0	408306
CG34120	CG34120	496.1		0	318066		0	1275311		0	NA		0	410829
CG31689	CG31689	496.2		0	326154		0	NA		0	660411		0	410552
CG4822	CG4822	496.3		0	33170		0	NA		0	660350		0	724304
CG5853	CG5853	496.4		0	34322		0	1271438		0	662294		0	726944
CG3164	CG3164	497.1		0	33171		0	1279268		0	659288		0	414051
CG17646	CG17646	497.2		0	33354		0	1271437		0	659849		0	NA
CG9663	CG9663	497.3		0	33541		0	NW_001953046.1!139510!139962+NW_001953046.1!140019!140348		0	662332		0	NA
ABC transporter expressed in trachea	Atet	497.4		0	33636		0	1281268		0	662254		0	GB19012
CG11601	CG11601	498.1	((1,2),3);	1	33197		0	NA		0	NA		0	NA
CG3625	CG3625	498.2		2	33198		0	1275474	(1,2);	1	659691,100141816		0	412929
CG6149	CG6149	498.3		3	39277		0	NA		0	NA		0	NA
CG4164	CG4164	499.1		0	33220		0	1277658		0	662544		0	552223
DnaJ homolog	DnaJ-H	499.2		0	34707		0	NA		0	NA		0	NA
DnaJ-like-2	Droj2	499.3		0	41646		0	1276654,1272268		0	660093,659314		0	724368
CG11835	CG11835	500.1	(1,2);	1	33232		0	NA		0	656401		0	NA
bicaudal	bic	500.2		2	45827		0	1277199		0	NA		0	726620
excitatory amino acid transporter 2	Eaat2	501.1		0	33247		0	1278051,1270340		0	658629,659711	(1,2);	0	408769,406113,409919
excitatory amino acid transporter 1	Eaat1	501.2		0	34251		0	1269241		0	655094	(3,4);	3	412382,551759
metabotropic GABA-B receptor subtype 3	GABA-B-R3	502.1		0	33248		0	1271397		0	662795		0	410979
metabotropic GABA-B receptor subtype 1	GABA-B-R1	502.2		0	34878		0	1279704		0	657833		0	408760
metabotropic GABA-B receptor subtype 2	GABA-B-R2	502.3		0	42561		0	3291047		0	658289		0	410140
CG3544	CG3544	503.1	(1,2);	1	33252		0	NA		0	NA		0	NA
CG3534	CG3534	503.2		2	42047		0	1272047		0	658259		0	409884
cGMP-dependent protein kinase 21D	Pkg21D	504.1		0	33253		0	1275446		0	657149		0	NA
CG4839	CG4839	504.2		0	34348		0	1279209		0	NA		0	NA
foraging	for	504.3		0	44817		0	1279830		0	662523		0	406092
kraken	kraken	505.1		0	33265		0	1279670		0	658960		0	409335
CG7632	CG7632	505.2	(1,2);	1	40357	((1,2),3);	3	5668162,1269236,4578112	(1,2);	1	664335,657044		0	NA
CG11309	CG11309	505.3		2	40356		0	NA		0	NA		0	NA
CG4341	CG4341	506.1	(1,2);	1	33276		0	1280064		0	NA		0	NA
CG31690	CG31690	506.2		2	33455		0	NA		0	660168		0	408787
CG5038	CG5038	506.3		0	41867		0	1275041		0	662296		0	GB15958
CG4415	CG4415	507.1	(1,2);	1	33279		0	NA		0	NA		0	NA
nascent polypeptide associated complex protein alpha subunit	Nacalpha	507.2		2	36409		0	1270297		0	659257		0	551157
Autophagy-specific gene 4	Atg4	508.1		0	33283		0	1277474		0	661682		0	552197
CG6194	CG6194	508.2		0	41868		0	1278841		0	659720		0	410257
CG14340	CG14340	509.1	(1,2);	1	33287		0	NA		0	NA		0	NA
CG34351	CG34351	509.2		2	5740672		0	1280269		0	662605		0	725758
CG4887	CG4887	510.1	(1,2);	1	33304		0	NA		0	NA		0	NA
CG4896	CG4896	510.2		2	33305		0	1275439		0	659694		0	410688
robo3	robo3	511.1		0	33314		0	3292147		0	658818		0	NA
roundabout	robo	511.2		0	37603	(1,2);	1	1270988,1270986		0	655427		0	412739
leak	lea	511.3		0	44522		0	NW_001953046.1!16455333!16455896+NW_001953046.1!16454389!16455264+NW_001953046.1!16454178!16454324		0	NA		0	NA
CG14351	CG14351	512.1		0	33339		0	1278113		0	TC014301		0	GB12168
CG11136	CG11136	512.2		0	37342		0	1269797		0	660307		0	551378
CG18317	CG18317	513.1		0	33350		0	1271244		0	663998		0	409122
CG8026	CG8026	513.2		0	35941		0	1269574	(1,2);	1	660638,663576		0	410062
CG31663	CG31663	514.1		0	33363	(1,2);	1	1279477,NW_045841.1!1667253!1667540+4576905		0	660966		0	NA
CG31663	CG31663	514.2		0	33363		0	NA		0	TC004711		0	725192
CG12858	CG12858	514.3		0	36634		0	1273877		0	TC000461		0	GB16483
CG15362	CG15362	515.1	(1,2);	1	33371		0	NA		0	NA		0	NA
CG34015	CG34015	515.2		2	3885570		0	1269652		0	TC030569		0	552803
glutamate oxaloacetate transaminase 2	Got2	516.1		0	33373		0	1279074		0	658177		0	412675
glutamate oxaloacetate transaminase 1	Got1	516.2		0	36782		0	1273967		0	658043		0	NA
Niemann-Pick type C-2a	Npc2a	517.1		0	33374		0	NA		0	664531		0	551922
Niemann-Pick type C-2b	Npc2b	517.2		0	41710		0	1273110		0	656806		0	725038
Ets at 21C	Ets21C	518.1		0	33229		0	1271416		0	663364		0	725629
anterior open	aop	518.2		0	33392		0	1271263		0	663895		0	GB17935
Ets at 65A	Ets65A	518.3		0	38700		0	1276424		0	661753		0	551804
Ecdysone-induced protein 74EF	Eip74EF	518.4		0	39962		0	3290353		0	655028		0	408758
pointed	pnt	518.5		0	42757		0	1275912		0	659984		0	412916
Ets96B	Ets96B	518.6		0	42952		0	3291985		0	660644		0	726458
Ets at 97D	Ets97D	518.7		0	43236		0	1274484		0	658879		0	411268
Ets at 98B	Ets98B	518.8		0	43334		0	NW_001953042.1!12710193!12710525		0	656847		0	413060
CG4270	CG4270	519.1	((1,2),3);	1	33408		0	NA		0	655834		0	552244
CG4270	CG4270	519.2		0	33408		0	NA		0	TC001143		0	GB12915
CG16995	CG16995	519.3		3	33413		0	1269647		0	NA		0	NA
CG34049	CG34049	519.4		2	3885620		0	NA		0	NA		0	NA
CG31482	CG31482	519.5		0	40806		0	NA		0	NA		0	NA
CG3597	CG3597	520.1	((1,2),3);	1	33420		0	NA		0	NA		0	NA
CG3609	CG3609	520.2		2	33421	(1,2);	1	1279361,1280182	(1,2);	1	661259,660272		0	412231
CG3609	CG3609	520.3		0	33421		0	NA		0	658577		0	552024
CG13280	CG13280	520.4		3	35015		0	NA		0	NA		0	NA
CG9870	CG9870	521.1	(1,2);	1	33425		0	NA		0	655277		0	726815
CG18173	CG18173	521.2		2	38220		0	4578083		0	NA		0	NA
vesicular glutamate transporter	VGlut	522.1		0	33427		0	1277956		0	662638		0	410752
CG4288	CG4288	522.2		0	42426	(1,2);	1	1277177,1277178	(1,2);	1	659046,659204		0	412220
CG3528	CG3528	523.1	((1,2),3);	1	33436		0	NA		0	NA		0	NA
CG14013	CG14013	523.2		2	33786		0	NA		0	NA		0	GB15430
CG8138	CG8138	523.3		3	41619		0	3290120		0	655462		0	NA
CG3515	CG3515	524.1	(1,2);	1	33437		0	NA		0	NA		0	NA
CG17293	CG17293	524.2		2	34153		0	1279086		0	654994		0	411879
CG3227	CG3227	525.1	((1,2),3);	1	33441		0	4578401		0	TC005343		0	NA
CG9883	CG9883	525.2		2	33442		0	NA		0	NA		0	NA
Blastoderm-specific gene 25A	Bsg25A	525.3		3	33669		0	NA		0	NA		0	NA
dynamin related protein 1	Drp1	526.1		0	33445		0	1279863		0	660635		0	411472
optic atrophy 1-like	opa1-like	526.2		0	36578		0	1270645		0	660454		0	413438
shibire	shi	526.3		0	45928		0	1272935		0	657469		0	410923
proteasome beta4R1 subunit	Prosbeta4R1	527.1	((1,2),3);	1	33449		0	NA		0	NA		0	NA
proteasome beta4R2 subunit	Prosbeta4R2	527.2		2	33451		0	NA		0	NA		0	NA
CG17331	CG17331	527.3		3	34999		0	1279804		0	656283		0	409978
CG9961	CG9961	528.1	(1,2);	1	33459		0	NA		0	NA		0	NA
phosphoglycerate kinase	Pgk	528.2		2	33461		0	1275659		0	656521		0	411576
CG33543	CG33543	529.1	(1,2);	1	3346207		0	NA		0	NA		0	NA
CG15630	CG15630	529.2		2	33676		0	1271391		0	660103		0	NA
discoidin domain receptor	Ddr	530.1	(1,2);	1	3346209		0	NA		0	NA		0	NA
discoidin domain receptor	Ddr	530.2		0	3346209		0	NA		0	655103		0	725150
discoidin domain receptor	Ddr	530.3		0	3346209		0	NA		0	657229		0	408922
CG34380	CG34380	530.4		2	5740323		0	1275596+4578049	(1,2);	0	TC001551,657382,100142401	(1,2);	0	411213,411212,411201
CG1561	CG1561	531.1		0	32108	((1,2),(3,4));	1	1281621_1,1281621_2,1281623_1,1281623_2	((((((((1,2),3),4),((5,6),7)),8),9)),((10,11),12)),((13,14),15))	5	663183,655292,663256,663210,663104,663077,663022_1,663022_2,655454,662997_1,662997_2,662997_3,100141764,663157,663131		0	NA
CG33511	CG33511	531.2	(1,2);	1	3346223		0	NA		0	NA		0	NA
CG9259	CG9259	531.3		2	35372	((1,2),3);	3	1269011,1278007_1,1278007_2		0	663958		0	552326
CG33966	CG33966	532.1		0	3885642		0	1280520		0	NA		0	NA
CG2663	CG2663	532.2		0	40649		0	1273406	((1,2),3);	1	662012,658874,656768		0	551761
TBP-associated factor 10b	Taf10b	533.1	(1,2);	1	33468		0	NA		0	NA		0	NA
TBP-associated factor 10	Taf10	533.2		2	33469		0	1275459		0	658913		0	410004
synaptotagmin 12	Syt12	534.1		0	32290		0	NA		0	664075		0	725891
synaptotagmin 1	Syt1	534.2		0	33473		0	1278013	(1,2);	1	657877,658788		0	408613
synaptotagmin alpha	Sytalpha	534.3		0	35068		0	1275499		0	NA		0	NA
synaptotagmin 4	Syt4	534.4		0	40876		0	1281315		0	657001		0	409957
Rim	Rim	534.5		0	42150		0	3290503+1281485		0	663311		0	727066+410001
Syt7	Syt7	534.6		0	43783		0	NA		0	659889		0	409138
CG2964	CG2964	535.1	(((1,2),3),4);	4	33475		0	NA		0	NA		0	NA
CG7362	CG7362	535.2		3	41787		0	NA		0	NA		0	NA
pyruvate kinase	PyK	535.3		1	42620		0	1275938	(((1,2),3),4);	1	656993,659361,655824,657823	(1,2);	1	552007,413112
CG7069	CG7069	535.4		2	42621		0	NA		0	NA		0	NA
gamma-Tubulin at 23C	gammaTub23C	536.1	(1,2);	1	33501		0	1278124		0	100142364		0	411508
gamma-Tubulin at 37C	gammaTub37C	536.2		2	35199		0	NA		0	NA		0	NA
Chromodomain-helicase-DNA-binding protein 1	Chd1	537.1		0	33505		0	NA		0	658899		0	724599
Chd3	Chd3	537.2	(1,2);	1	40111		0	NA		0	NA		0	NA
Mi-2	Mi-2	537.3		2	40170		0	1280662		0	100142337		0	552031
enhancer of bithorax	E(bx)	537.4		0	44811		0	3290113		0	100141790		0	412256
okra	okr	538.1		0	33507		0	3291801		0	656357		0	409447
okra	okr	538.2		0	33507		0	1270139		0	NA		0	552169
CG5899	CG5899	538.3		0	34311		0	1279402		0	655456		0	412850
imitation SWI	Iswi	538.4		0	36390		0	1272459		0	660820		0	412742
brahma	brm	538.5		0	39744		0	1272575		0	655742		0	551881
CG17224	CG17224	539.1	((1,2),3);	3	33510		0	NA		0	NA		0	NA
CG3788	CG3788	539.2		1	37644		0	NA		0	NA		0	NA
CG6330	CG6330	539.3		2	43240		0	1272077	(1,2);	1	656823,656733		0	411599
alpha4GT1	alpha4GT1	540.1	(1,2);	1	33512	(((1,2),3),4);	4	1277725,3291689,3291688,4578099		0	658448	((1,2),3);	3	727304,GB17577,GB14854
alpha4GT2	alpha4GT2	540.2		2	43124		0	NA		0	NA		0	NA
CG17259	CG17259	541.1		0	33518		0	1277721		0	656867	(1,2);	1	413011,727461
Seryl-tRNA synthetase	Aats-ser	541.2		0	41862		0	5666837		0	TC011377		0	724712
CG3347	CG3347	542.1	(1,2);	1	33538		0	NA		0	NA		0	NA
protein partner of snf	pps	542.2		2	41524		0	1275090		0	658430		0	724402
CG42265	CG42265	543.1		0	7354434		0	1272289		0	663528	(1,2);	1	410820,GB10558
CG3332	CG3332	543.2		0	33539		0	NA		0	656260		0	410870
CG3326	CG3326	544.1		0	33544		0	1278196		0	657216		0	552806
spastin	spas	544.2		0	42846		0	1273633		0	664454		0	409576
dead box protein 80	Dbp80	545.1		0	3354919		0	1272773		0	662733		0	552567
helicase at 25E	Hel25E	545.2		0	33781		0	1280031+NW_001953045.1!6271999!6272277		0	662877		0	552515
eukaryotic initiation factor 4a	eIF-4a	545.3		0	33835		0	1279280		0	100463502		0	411989
maternal expression at 31B	me31B	545.4		0	34364		0	1280091		0	663396		0	552206
eIF4AIII	eIF4AIII	545.5		0	40987		0	1273765		0	664411		0	409866
Glutamine:fructose-6-phosphate aminotransferase 1	Gfat1	546.1	(1,2);	1	3354921		0	NA		0	655349		0	406107
Glutamine:fructose-6-phosphate aminotransferase 2	Gfat2	546.2		2	43373		0	1270588		0	NA		0	NA
CG40178	CG40178	547.1	(1,2);	1	3354941		0	1278667+5666794		0	657591		0	412118
CG41320	CG41320	547.2		2	5740635		0	NA		0	NA		0	NA
CG40467	CG40467	548.1	(1,2);	1	3354976		0	NA		0	NA		0	NA
CG4484	CG4484	548.2		2	39055	(((1,2),3),4);	3	1271104,1271101,1271102,1272131		0	663009		0	551137
SP71	SP71	549.1		0	3354987		0	1272942		0	657400		0	410975
no mechanoreceptor potential A	nompA	549.2		0	45587		0	1270003		0	661513		0	724520
CG2893	CG2893	550.1		0	3354992		0	NW_001953042.1!6161097!6161372		0	657263		0	NA
CG1090	CG1090	550.2		0	40551		0	1274664		0	655976		0	NA
Nckx30C	Nckx30C	550.3		0	45248		0	4578011		0	655611		0	412777
CG17168	CG17168	551.1		0	3354996		0	NW_001953044.1!5544237!5544662		0	661495		0	410672
nuclear inhibitor of protein phosphatase 1	NiPp1	551.2		0	44748		0	1280584		0	656775		0	GB19762
G protein-coupled receptor kinase 1	Gprk1	552.1		0	3355013		0	1280643		0	654946		0	413197
G protein-coupled receptor kinase 2	Gprk2	552.2		0	49045		0	1273941		0	TC011652		0	410632
CG40127	CG40127	553.1	(1,2);	1	3355016		0	1277001	(1,2);	1	664497,TC006752		0	725572
CG11269	CG11269	553.2		2	37527		0	NA		0	NA		0	NA
CG12413	CG12413	554.1		0	43382		0	1281504		0	662801		0	406098
eIF5B	eIF5B	554.2		0	44261		0	1278404		0	662115		0	408556
CG14782	CG14782	555.1		0	31105		0	1275399		0	664499		0	551633
hepatocyte growth factor regulated tyrosine kinase substrate	Hrs	555.2		0	33458		0	1279855		0	656221		0	410510
CG41099	CG41099	555.3		0	3355072		0	1269318		0	TC030598		0	726291
fab1	fab1	555.4		0	37033		0	1274924		0	658852		0	410183
CG5270	CG5270	555.5		0	41370		0	1270393		0	662647		0	725704
CG6051	CG6051	555.6		0	43271		0	1274352		0	663837		0	413998
smad anchor for receptor activation	Sara	555.7		0	44263		0	1270913		0	662938		0	413457
synapse protein 25	Snap25	556.1	(1,2);	1	3355084		0	1281784		0	663588		0	411114
synapse protein 24	Snap24	556.2		2	41193		0	NA		0	NA		0	NA
Apoptosis-linked gene-2	Alg-2	557.1		0	3355106		0	NA		0	664498		0	408672
CG17765	CG17765	557.2		0	36111		0	1276905		0	TC004722		0	726147
Spf45	Spf45	558.1		0	3355114		0	1280262		0	664035		0	409696
poly U binding factor 68kD	pUf68	558.2		0	38173		0	1275288		0	663345		0	725115
CG40005	CG40005	559.1	(1,2);	1	3355118		0	NA		0	NA		0	NA
concertina	cta	559.2		2	3355131		0	1269257		0	661072		0	410906
mushroom bodies tiny	mbt	560.1		0	32631		0	1271082		0	658117		0	726405
PAK-kinase	Pak	560.2		0	44039		0	1272970		0	656127		0	724453
immune response deficient 5	ird5	560.3		0	44432		0	3291915		0	658393		0	550741
MAP kinase activated protein-kinase-2	MAPk-Ak2	560.4		0	44573		0	1280769		0	662443		0	411523
Lk6	Lk6	560.5		0	44672		0	NW_001953040.1!1737626!1737991+1273831		0	658754		0	412470
CG17528	CG17528	560.6		0	3355134		0	1279992		0	655891		0	410910
loki	lok	560.7		0	35288	(1,2);	1	1279197,1277641		0	661264		0	551949
Pak3	Pak3	560.8		0	41995		0	1281327		0	655315		0	551659
protein kinase D	PKD	560.9		0	42203		0	1272204		0	663691		0	412608
Calcium/calmodulin-dependent protein kinase I	CaMKI	560.10		0	43792		0	1270367		0	656309		0	727249
Calcium/calmodulin-dependent protein kinase II	CaMKII	560.11		0	43828		0	1272250		0	655266		0	551691
argonaute 3	AGO3	561.1		0	3355150		0	1279829		0	656427		0	725111
piwi	piwi	561.2	(1,2);	1	34521		0	NA		0	NA		0	NA
aubergine	aub	561.3		2	34524	(1,2);	1	1271402,1270718		0	658366		0	412427
CG40002	CG40002	562.1	(1,2);	1	3355155		0	NA		0	NA		0	NA
CR40472	CG40472	562.2		2	8673970		0	1273330		0	659363		0	726146
CG41106	CG41106	563.1	(1,2);	1	3355167		0	NA		0	NA		0	NA
CG8009	CG8009	563.2		2	39204		0	1276127		0	TC010342		0	725054
FucTC	FucTC	564.1		0	3355171		0	1271890	(1,2);	1	663102,663075		0	724797
FucTA	FucTA	564.2		0	39653		0	1273862		0	655857		0	408804
FucTA	FucTA	564.3		0	39653		0	NA		0	656368		0	724588
Ppr-Y	Ppr-Y	565.1	(1,2);	1	3355180		0	NA		0	NA		0	NA
CG13125	CG13125	565.2		2	34318		0	4578314		0	664091		0	GB12451
sds22	sds22	565.3		0	42091		0	1279257		0	663856		0	413165
CG3213	CG3213	566.1	(1,2);	1	33574		0	5668337		0	662898		0	726347
CG13405	CG13405	566.2		2	38016		0	NA		0	NA		0	NA
scavenger receptor class C, type IV	Sr-CIV	567.1	(((1,2),3),4);	3	33576		0	NA		0	NA		0	NA
scavenger receptor class C, type I	Sr-CI	567.2		1	33621		0	NA		0	NA		0	411253
scavenger receptor class C, type II	Sr-CII	567.3		2	44219		0	1280695		0	100142307		0	NA
scavenger receptor class C, type III	Sr-CIII	567.4		4	44382		0	NA		0	NA		0	NA
CG2818	CG2818	568.1	((((1,2),3),4),5);	5	33597		0	4578030		0	662257		0	410117
CG9394	CG9394	568.2		3	37399		0	NA		0	NA		0	NA
CG11619	CG11619	568.3		1	40072		0	NA		0	NA		0	NA
CG18135	CG18135	568.4		2	40073		0	NA		0	NA		0	NA
CG3942	CG3942	568.5		4	41489		0	NA		0	NA		0	NA
CG3964	CG3964	569.1	(1,2);	1	33609		0	NA		0	NA		0	NA
CG31108	CG31108	569.2		0	43015		0	1274440		0	659532		0	414032
CG16833	CG16833	569.3		2	47729		0	1280107		0	TC030652	((1,2),3);	3	413213,724379,413737
friend of echinoid	fred	570.1	(1,2);	1	33613		0	NA		0	NA		0	NA
echinoid	ed	570.2		2	33619	(1,2);	1	1279606,3292140+1279605+NW_001953046.1!14990929!14991609		0	TC012257		0	413423
arginine methyltransferase 2	Art2	571.1	(((1,2),3),4);	3	33631		0	NA		0	NA		0	NA
arginine methyltransferase 8	Art8	571.2		0	34528		0	1279809		0	657582		0	NA
arginine methyltransferase 1	Art1	571.3		4	41295		0	1272833		0	659866		0	725362
arginine methyltransferase 9	Art9	571.4		1	41698		0	NA		0	NA		0	NA
arginine methyltransferase 6	Art6	571.5		2	41699		0	NA		0	NA		0	NA
arginine methyltransferase 3	Art3	571.6		0	41837		0	NW_001953040.1!8042469!8043710		0	663225		0	412580
CG16857	CG16857	572.1		0	33635		0	1279913		0	662218		0	551628
turtle	tutl	572.2		0	46015		0	1278027		0	TC008291		0	408770
Trehalose-6-phosphate synthase 1	Tps1	573.1		0	33642		0	1277752		0	659356		0	408867
CG5171	CG5171	573.2	(1,2);	1	34016		0	1277754		0	NA		0	NA
CG5177	CG5177	573.3		2	34017		0	NA		0	NA		0	NA
CG15439	CG15439	574.1		0	33651		0	1272343		0	659069		0	GB12845
CG1845	CG1845	574.2		0	35648		0	4576217		0	655617		0	411881
rhinoceros	rno	574.3		0	38027		0	4576338		0	659824		0	413377
CG3244	CG3244	575.1		0	33678		0	1279613		0	657853		0	552154
CG6055	CG6055	575.2		0	34027		0	1279616		0	660573		0	411770
CG4115	CG4115	575.3		0	41499		0	1277040		0	660099		0	551905
CG15629	CG15629	576.1		0	33679		0	1277830		0	660376		0	552689
CG9265	CG9265	576.2		0	35369		0	1279655		0	661003	(1,2);	1	409260,GB17598
CG12194	CG12194	577.1	(1,2);	1	33685		0	NA		0	NA		0	NA
CG8602	CG8602	577.2		2	38808		0	1271386		0	661261		0	408634
CG3008	CG3008	578.1		0	33693		0	1279416		0	664050		0	725615
CG11660	CG11660	578.2		0	39309		0	1280556		0	660167		0	NA
CG3036	CG3036	579.1		0	33695		0	1271412	(((1,2),((3,4),5)),6);	1	660715,659088,659007,659168,660772,663951		0	550691
Na[+]-dependent inorganic phosphate cotransporter	NaPi-T	579.2		0	36651		0	1278266		0	658391		0	725470
CG9864	CG9864	579.3		0	37287	(1,2);	1	4577825,1272674	(((1,2),3),4);	4	656366,664059,664037,664049		0	552293
beta subunit of type I geranylgeranyl transferase	betaggt-I	580.1		0	33704		0	1277573		0	658180		0	412933
CG17565	CG17565	580.2		0	41989		0	1281446		0	659329		0	552739
beta subunit of type II geranylgeranyl transferase	betaggt-II	580.3		0	47757		0	NW_045841.1!12243122!12243679		0	658252		0	726822
Rtnl1	Rtnl1	581.1	(1,2);	1	33721		0	1278015		0	655520		0	411690
Rtnl2	Rtnl2	581.2		2	40903		0	NA		0	NA		0	NA
viking	vkg	582.1		0	33726		0	1280162		0	663310		0	408551
collagen type IV	Cg25C	582.2		0	33727		0	1280160		0	TC013472		0	408552
multiplexin	mp	582.3		0	38769		0	1277113		0	659234		0	412865
CG42342	CG42342	582.4		0	7354466		0	4577472		0	659070		0	551490
Rpn11	Rpn11	583.1		0	33738		0	1275466		0	657072		0	410072
COP9 complex homolog subunit 5	CSN5	583.2		0	42000		0	1273087		0	661522		0	551410
troponin C at 25D	TpnC25D	584.1		0	33752		0	1271259		0	661169		0	494503
troponin C at 25D	TpnC25D	584.2		0	33752		0	NA		0	659805		0	494501
troponin C at 41C	TpnC41C	584.3	((1,2),(3,4));	3	35473		0	1276847		0	659195		0	408379
troponin C isoform 4	TpnC4	584.4		4	35498		0	NA		0	NA		0	NA
troponin C at 47D	TpnC47D	584.5		1	36195		0	NA		0	662809		0	NA
troponin C at 73F	TpnC73F	584.6		2	39916		0	1269836		0	NA		0	411659
thickveins	tkv	585.1		0	33753		0	1271240		0	659260		0	408442
saxophone	sax	585.2		0	35731		0	1269509		0	658545		0	725711
baboon	babo	585.3		0	35900		0	1269085		0	659969		0	NC_007075!16231804!16231977
Bub1 homologue	Bub1	586.1	(1,2);	1	33758		0	NA		0	660046		0	726325
Bub1-related kinase	BubR1	586.2		2	35522		0	1270801		0	NA		0	NA
CG14024	CG14024	587.1		0	33760		0	1280070		0	NA		0	NA
CG13937	CG13937	587.2		0	38249		0	1276395		0	654881		0	413914,726192
CG14022	CG14022	588.1	(((((1,2),3),4),5),6;	6	33763		0	1277675		0	100141566	(1,2);	1	724904,552639
acylphosphatase	Acyp	588.2		4	34807		0	NA		0	NA		0	NA
CG18371	CG18371	588.3		2	36556		0	NA		0	NA		0	NA
acylphosphatase 2	Acyp2	588.4		3	41910		0	NA		0	NA		0	NA
CG11052	CG11052	588.5		5	49997		0	NA		0	NA		0	NA
CG34161	CG34161	588.6		1	5740441		0	NA		0	NA		0	NA
lamin	Lam	589.1	(1,2);	1	33782	(1,2);	1	1280731,1277933		0	661551		0	NA
lamin C	LamC	589.2		2	36615		0	NA		0	NA		0	413222
CG14011	CG14011	590.1	((1,2),3);	3	33790		0	1269563		0	TC012845		0	NA
CG7251	CG7251	590.2		1	33791		0	NA		0	NA		0	NA
CG18266	CG18266	590.3		2	33792		0	NA		0	NA		0	NA
CG11149	CG11149	591.1	((1,2),3);	1	33800		0	NA		0	NA		0	NA
CG9171	CG9171	591.2		2	33807	(1,2);	1	1271308,3291965	((((1,2),3),4),5);	5	661089,660118,100141524,660181,659754		0	409245
CG9171	CG9171	591.3		0	33807		0	NA		0	100141898		0	727358
CG15483	CG15483	591.4		3	34687		0	NA		0	NA		0	NA
CG11147	CG11147	592.1		0	33803		0	1281053		0	NA		0	NA
CG31731	CG31731	592.2		0	34783		0	1281655		0	NA		0	NA
CG33970	CG33970	592.3		0	43186		0	1273324		0	655705		0	NA
CG9990	CG9990	592.4		0	43391		0	1274354		0	663804		0	409666
CG11029	CG11029	593.1	(1,2);	1	33804		0	NA		0	NA		0	NA
CG7365	CG7365	593.2		2	40200	((((1,2),3),4),5);	1	1275977,1277007,5667344,1275979,1275978	(1,2);	1	657169,657084	(((((1,2),3),4),5),6;	3	412515,551805,725668,551879,411706,552829
CG11034	CG11034	594.1		0	33810		0	1277791		0	663932		0	410337
CG3744	CG3744	594.2		0	42972		0	1273811		0	660643		0	412681
omega	ome	594.3		0	44297		0	1271175		0	660714		0	NA
CG34381	CG34381	595.1		0	33812		0	4578086+1275552		0	664004		0	NA
Tachykinin-like receptor at 86C	Takr86C	595.2		0	41286		0	1273136		0	660026		0	NA
Tachykinin-like receptor at 99D	Takr99D	595.3		0	43551		0	1281581		0	658644		0	411611
blue cheese	bchs	596.1		0	33819		0	3292356+3292239		0	655832		0	GB30083
CG11814	CG11814	596.2		0	38259		0	NW_045746.1!1052033!1054582		0	NA		0	408774
CG1332	CG1332	596.3		0	38512		0	1272766		0	NA		0	NA
rugose	rg	596.4		0	44531		0	1272258		0	TC007591+TC007593		0	408881+724701
ultraspiracle	usp	597.1		0	31165		0	1281377		0	661207		0	409227
dissatisfaction	dsf	597.2		0	33823		0	1278936		0	664148		0	551876
hormone receptor 51	Hr51	597.3		0	36702		0	1279307		0	658951		0	413558
Hormone-receptor-like in 78	Hr78	597.4		0	40378		0	1277597		0	660024		0	NA
hormone receptor 83	Hr83	597.5		0	40783		0	1269327		0	NA		0	725321
seven up	svp	597.6		0	41491		0	1273419+4577041		0	655884		0	408872
tailless	tll	597.7		0	43656		0	1277430		0	641541		0	725327
tailless	tll	597.8		0	43656		0	1281831		0	661886		0	551649
glycerol 3 phosphate dehydrogenase	Gpdh	598.1	((1,2),3);	1	33824		0	1269636		0	663884	(1,2);	1	726445,GB20014
CG3215	CG3215	598.2		2	37672		0	NA		0	NA		0	NA
CG43343	CG43343	598.3		3	42624		0	NA		0	NA		0	NA
beta galactosidase	Gal	599.1		0	33839		0	1281056		0	NA		0	NA
Ect3	Ect3	599.2		0	41457		0	NW_045841.1!1417430!1418686		0	655835,656432		0	725756
homeodomain protein 2.0	H2.0	600.1		0	33841		0	NA		0	TC008368		0	725302
CG42234	CG42234	600.2		0	38254		0	1276399		0	TC015146		0	724419
CG9140	CG9140	601.1	((1,2),3);	3	33852		0	1279464		0	659459		0	408367
CG8102	CG8102	601.2		1	36695		0	NA		0	NA		0	NA
CG11423	CG11423	601.3		2	36998		0	NA		0	NA		0	NA
cytochrome P450 reductase	Cpr	602.1		0	33883		0	1271741		0	659809		0	724870
nitric oxide synthase	Nos	602.2		0	34495		0	1277726		0	655549		0	503861
CG14882	CG14882	602.3		0	41994	(1,2);	1	1281330,1268765		0	655238		0	NA
CG9527	CG9527	603.1		0	33898	(1,2);	1	1277993,1270711		0	658001		0	412020
CG17544	CG17544	603.2		0	35213		0	1277932		0	660385		0	NA
CG9550	CG9550	604.1	(1,2);	1	33913		0	NA		0	NA		0	NA
CG31637	CG31637	604.2		2	33914		0	1279223		0	661137		0	412612
CG11015	CG11015	605.1	(1,2);	1	33918		0	1275574		0	656612		0	552610
CG11043	CG11043	605.2		2	33919		0	NA		0	NA		0	NA
organic anion transporting polypeptide 26F	Oatp26F	606.1		0	33927		0	1275562		0	NA		0	552333
organic anion transporting polypeptide 30B	Oatp30B	606.2		0	34268		0	3291790		0	661450		0	409670
tubulin tyrosine ligase-like 3B	TTLL3B	607.1		0	33946		0	1279379		0	NA		0	NA
tubulin tyrosine ligase-like 3A	TTLL3A	607.2		0	33947		0	1279380		0	657190,657266		0	724611,410428
CG11221	CG11221	608.1		0	33948		0	1279349		0	NA		0	410562
CG4945	CG4945	608.2		0	36850		0	1278616		0	655263		0	724149
nervana 1	nrv1	609.1		0	33952		0	NA	(1,2);	1	662497,655688		0	NA
nervana 2	nrv2	609.2		0	33953		0	1278171		0	661633		0	410905
nervana 3	nrv3	609.3		0	35408		0	1278962		0	661678		0	408722
CG11236	CG11236	610.1		0	33955	(1,2);	1	1282047,1282066		0	663711		0	551507
CG12338	CG12338	610.2		0	36128		0	1276030		0	657558		0	552692
Na[+]/H[+] hydrogen antiporter 1	Nha1	611.1		0	33961		0	1281378		0	663852		0	725900,410780
Na[+]/H[+] hydrogen antiporter 2	Nha2	611.2		0	42710		0	1273645		0	NA		0	NA
neuroligin	neuroligin	612.1		0	33962		0	1281357		0	663865		0	GB10066
neuroligin	neuroligin	612.2		0	33962		0	1280747		0	NA		0	724137
CG34127	CG34127	612.3		0	40912		0	3290865		0	659852		0	409003
CG31146	CG31146	612.4		0	40913		0	1274229		0	659779		0	724358
CG34139	CG34139	612.5		0	42402		0	1273785		0	659717		0	411321
wee	wee	613.1		0	33965		0	1278164		0	657501		0	551677
Myt1	Myt1	613.2		0	38649		0	3290534		0	659898		0	NA
nop5	nop5	614.1		0	33966		0	1269383		0	662214		0	411842
CG6876	CG6876	614.2		0	39655		0	1280535		0	657532		0	410907
Nop56	Nop56	614.3		0	42633		0	1281050		0	662315		0	GB14895
heterogeneous nuclear ribonucleoprotein at 27C	Hrb27C	615.1		0	33968		0	1281194		0	655156		0	409961
RNA-binding protein 6	Rbp6	615.2		0	39919		0	1277242		0	656553		0	551123
musashi	msi	615.3		0	43087		0	1281129		0	656824		0	GB18853
CG10158	CG10158	616.1	(1,2);	1	33971		0	1280558		0	663148		0	411546
heineken-cup	h-cup	616.2		2	41879		0	NA		0	NA		0	NA
Gas41	Gas41	617.1		0	33973		0	1279030		0	662172		0	412705
ENL/AF9-related	ear	617.2		0	44451		0	1281334		0	TC011185		0	724205
CG4495	CG4495	618.1	(1,2);	1	33999		0	4578197		0	662118		0	552081
CG4662	CG4662	618.2		0	42357		0	1274002	(1,2);	1	658822,663456		0	408562
CG4704	CG4704	618.3		2	42706		0	NA		0	NA		0	NA
Na[+]-driven anion exchanger 1	Ndae1	619.1		0	34005		0	1279145		0	661759		0	409792
CG8177	CG8177	619.2		0	39147	(1,2);	1	1276784,1270117		0	657088		0	725581
CG13375	CG13375	620.1		0	30976	(1,2);	1	1270628,3290360		0	655342		0	410943
Ras oncogene at 64B	Ras64B	620.2		0	38494		0	NA		0	660624		0	410415
CG8519	CG8519	620.3		0	38745	(1,2);	0	1276691,1279951,1274241		0	657138,661100		0	724277
CG8641	CG8641	620.4		0	38771		0	NA		0	661962		0	409966
Ras oncogene at 85D	Ras85D	620.5		0	41140		0	1269341		0	663464		0	410812
CG8500	CG8500	620.6		0	41203		0	1270373		0	657287		0	725901
CG30158	CG30158	620.7		0	50149		0	1274961		0	656001		0	551930
Ras-related protein	Rala	620.8		0	31332		0	1280568		0	657283		0	413339
CG5160	CG5160	620.9		0	34015		0	1277755		0	664374		0	409633
Ras which interacts with calmodulin	Ric	620.10		0	36776		0	1274841		0	657580		0	411671
roughened	R	620.11		0	38244		0	1281247		0	658243		0	413246
Ras oncogene at 64B	Ras64B	620.12		0	38494		0	1273149		0	664493		0	409529
scavenger receptor acting in neural tissue and majority of rhodopsin is absent	santa-maria	621.1	((1,2),3);	3	34024		0	1275053	(1,2);	1	664123,664140	(1,2);	1	408790,410982
peste	pes	621.2		1	34087		0	NA		0	NA		0	NA
CG7227	CG7227	621.3		2	34088		0	NA		0	NA		0	NA
slowpoke binding protein	Slob	622.1		0	34039		0	1271242		0	656032		0	409492
CG8726	CG8726	622.2		0	35758		0	1274878		0	660832		0	408591
thiolester containing protein II	TepII	623.1	((1,2),((3,4),5));	3	34044		0	NA		0	NA		0	NA
macroglobulin complement-related	Mcr	623.2		0	44071		0	1275865		0	659530		0	413980
thiolester containing protein I	TepI	623.3		4	34937		0	NA		0	NA		0	NA
thiolester containing protein IV	TepIV	623.4		1	35248		0	NA		0	NA		0	NA
CG13079	CG13079	623.5		2	35250		0	NA		0	NA		0	NA
thiolester containing protein III	TepIII	623.6		5	34045	(((((((((1,2),3),4),(5,6)),7),8),9),(10,11)),12);	12	1277615,1278906,1278910,3291179,1271132,1271144,1271145,1275504,1277572,1277613,1278851,1271131		0	661594	(1,2);	1	726883,408926
CG7211	CG7211	624.1	(1,2);	1	34054		0	NA		0	NA		0	NA
lethal (2) 06225	l(2)06225	624.2		2	46069		0	1271420		0	656758		0	726222
CG7115	CG7115	625.1		0	34069		0	1277484		0	661637		0	552068
CG10417	CG10417	625.2		0	35492		0	1276838		0	655879		0	552412
Ppm1	Ppm1	625.3	((1,2),(3,4));	1	38071		0	NA		0	NA		0	NA
CG17746	CG17746	625.4		2	38400		0	1269292		0	664421		0	551020
CG6036	CG6036	625.5		3	43185		0	NA		0	NA		0	NA
alphabet	alph	625.6		4	43481		0	1277813		0	655020		0	NA
TweedleE	TwdlE	626.1		0	34075	(1,2);	1	1271701,1271700		0	658876		0	724398
TwdlBeta	TwdlBeta	626.2		0	36265		0	1274720		0	NA		0	NA
TweedleC	TwdlC	626.3	(1,2);	1	43245		0	NA		0	NA		0	NA
TweedleT	TwdlT	626.4		2	44790		0	5666738		0	657888		0	552281
spatzle 3	spz3	627.1		0	34077		0	1277619		0	659259		0	726201
spatzle 4	spz4	627.2		0	34572		0	1278089		0	100142309		0	551942
CG7224	CG7224	628.1	(1,2);	1	34089		0	1277556		0	100141753		0	726174
CG15283	CG15283	628.2		2	50454		0	NA		0	NA		0	NA
CG8673	CG8673	629.1	(1,2);	1	34105		0	NA		0	NA		0	NA
CG8668	CG8668	629.2		2	34107		0	1271998	(1,2);	1	659623,TC016222		0	726419
CG8498	CG8498	630.1		0	34111		0	4575968		0	663695		0	411272
CG8629	CG8629	630.2	(((1,2),(3,4)),5);	3	38781		0	NA		0	NA		0	NA
CG15829	CG15829	630.3		1	38782		0	NA		0	NA		0	NA
CG8628	CG8628	630.4		4	38783		0	NA		0	NA		0	NA
Diazepam-binding inhibitor	Dbi	630.5		5	38784		0	1269756		0	663684		0	NA
CG5804	CG5804	630.6		2	39005		0	NA		0	NA		0	NA
CG8360	CG8360	631.1	((1,2),3);	3	34122		0	1271421		0	660436	(1,2);	1	727234,724183
CG8353	CG8353	631.2		1	34123		0	NA		0	NA		0	NA
CG8349	CG8349	631.3		2	34124		0	NA		0	NA		0	NA
CG13390	CG13390	632.1		0	34154		0	1279088		0	654876		0	411922
CG10628	CG10628	632.2		0	35263		0	1277645		0	663678		0	413533
Alanyl-tRNA synthetase	Aats-ala	633.1		0	34156		0	1279087		0	654931		0	411923
mitochondrial alanyl-tRNA synthetase	Aats-ala-m	633.2		0	38595		0	1270102		0	664536		0	551243
catalase	Cat	634.1	(1,2);	1	40048		0	1275711	(1,2);	0	655157,658645,TC011090		0	443552,725561
CG9314	CG9314	634.2		2	34198		0	NA		0	NA		0	NA
CG9463	CG9463	635.1	(((1,2),(3,4)),(5,6));	1	34203		0	NA		0	NA		0	NA
CG9465	CG9465	635.2		2	34204		0	NA		0	NA		0	NA
CG9466	CG9466	635.3		3	34205		0	NA		0	NA		0	NA
CG9468	CG9468	635.4		4	34206		0	NA		0	NA		0	NA
CG5322	CG5322	635.5		5	34436		0	NA		0	NA		0	NA
CG6206	CG6206	635.6		6	34437		0	3291761	((((1,2),(3,4)),(((5,6),7),8)),9);	8	656928,656698,657014,656617,656534(1~1016aa),656534(1017~2002aa),656843,656754,TC006453		0	552249
CG13101	CG13101	636.1	(((1,2),(3,4)),5);	1	34221		0	1278948		0	660805		0	GB17903
rolling stone	rost	636.2		2	34222		0	NA		0	NA		0	NA
CG9555	CG9555	636.3		3	34223		0	NA		0	NA		0	NA
CG17906	CG17906	636.4		4	34224		0	NA		0	NA		0	NA
CG4480	CG4480	636.5		5	34864		0	NA		0	NA		0	NA
CG31708	CG31708	637.1	(1,2);	1	34231		0	1279385		0	662797		0	408715
CG42368	CG42368	637.2		2	7354433		0	NA		0	NA		0	NA
toll	Tl	638.1	(((1,2),3),4);	4	43222	(((1,2),(3,4)),5);	5	1270495,1272546,1272472,5666799,3289806	(((1,2),3),4);	1	656158,656071,662755,655507		0	412703
tehao	Tehao	638.2		3	34761		0	NA		2	NA		0	NA
MstProx	MstProx	638.3		1	40890		0	NA		3	NA		0	NA
Toll-4	Toll-4	638.4		2	34235		0	NA		4	NA		0	NA
australin	aust	639.1	(1,2);	1	34244		0	NA		0	NA		0	NA
borealin-related	borr	639.2		2	34245	(1,2);	1	1270705,1270706		0	662520		0	724643
Cyclin-dependent kinase subunit 30A	Cks30A	640.1		0	34250		0	1269240		0	664555		0	726047
Cyclin-dependent kinase subunit 85A	Cks85A	640.2		0	41034		0	1271535		0	663469		0	552597
aldehyde dehydrogenase	Aldh	641.1		0	34256		0	1274323		0	656328		0	550687
CG8665	CG8665	641.2		0	35407		0	1278957		0	658435		0	551401
CG31075	CG31075	641.3		0	43244	(1,2);	1	1279360,1274242		0	659438		0	GB18004
glial cells missing	gcm	642.1	(1,2);	1	34277		0	3291587		0	663985		0	410334
gcm2	gcm2	642.2		2	34280		0	NA		0	NA		0	NA
RPS6-protein kinase-II	S6kII	643.1		0	33139		0	1272910		0	664211		0	411481
protein kinase-like 17E	Pk17E	643.2		0	45970		0	1272029		0	660619		0	NA
cAMP-dependent protein kinase 1	Pka-C1	643.3		0	34284		0	1281793		0	656552		0	409791
RPS6-p70-protein kinase	S6k	643.4		0	38654		0	1269844		0	661481	(1,2);	1	412419,552549
JIL-1	JIL-1	643.5		0	39241		0	1276766		0	658616		0	411630
cAMP-dependent protein kinase 3	Pka-C3	643.6		0	39733		0	1280810		0	661839		0	410228
CG32944	CG32944	643.7		0	40560		0	1271762		0	655011		0	413577
CG12069	CG12069	643.8	(1,2);	1	43643		0	1277913		0	655660		0	410670
cAMP-dependent protein kinase 2	Pka-C2	643.9		2	43644		0	NA		0	NA		0	NA
CG4036	CG4036	644.1	(1,2);	1	34302		0	1278925		0	660615		0	551104
CG18854	CG18854	644.2		2	59212		0	NA		0	NA		0	NA
CG4598	CG4598	645.1	((1,2),3);	3	34315		0	3292126		0	TC003524		0	552000
CG4594	CG4594	645.2		1	34316		0	NA		0	NA		0	NA
CG4592	CG4592	645.3		2	34317		0	NA		0	NA		0	NA
CG5850	CG5850	646.1		0	34327		0	5668228		0	662540		0	552432
CG12004	CG12004	646.2		0	38185		0	1276774		0	657171		0	409373
pendulin	Pen	647.1		0	34338		0	1279204		0	664187		0	NA
CG10478	CG10478	647.2	(1,2);	1	38675		0	NA		0	NA		0	NA
karyopherin alpha1	Kap-alpha1	647.3		0	40160		0	1276102		0	656915		0	409543
karyopherin alpha3	Kap-alpha3	647.4		2	41158		0	1281905		0	663908		0	412511
ribosomal protein L7	RpL7	648.1		0	34352		0	1279884		0	663196		0	410131
CG5317	CG5317	648.2		0	34625		0	1269592		0	NA		0	NA
CG5731	CG5731	649.1		0	34355		0	1278996		0	663249		0	725899
CG7997	CG7997	649.2		0	36829		0	1276513		0	NA		0	NA
proteasome 35kD subunit	Pros35	650.1	(1,2);	1	34359		0	1279677		0	655339		0	552654
proteasome alpha6T subunit	Prosalpha6T	650.2		2	34726		0	NA		0	NA		0	NA
eEF1delta	eEF1delta	651.1		0	34363		0	1274080		0	657366		0	409015
elongation factor 1 beta	Ef1beta	651.2		0	45249		0	1275337		0	662587		0	552649
sevenless	sev	652.1		0	32039		0	1272261		0	TC001239		0	410671
Ror	Ror	652.2		0	34367		0	1276882		0	663368		0	413616
neurospecific receptor kinase	Nrk	652.3		0	36445		0	1270111		0	TC014181		0	408312
Insulin-like receptor	InR	652.4		0	42549		0	1280455		0	661524		0	GB18331
Insulin-like receptor	InR	652.5		0	42549		0	NA		0	664271		0	GB15492
Alk	Alk	652.6		0	53425		0	1280600		0	657445		0	408718
Mob3	Mob3	653.1		0	34372		0	1278083		0	657654		0	412626
Mob2	Mob2	653.2		0	39293		0	1271118		0	657020		0	408876
mob as tumor suppressor	mats	653.3		0	42634		0	1281047		0	660452		0	409540
CG5604	CG5604	654.1		0	34378		0	1271399		0	662402		0	726254
CG42574	CG42574	654.2		0	40596		0	1281881		0	658915		0	409382
GATAd	GATAd	655.1		0	34395		0	NA		0	100142041		0	724420
grain	grn	655.2		0	40962		0	3290975		0	660745		0	725177
serpent	srp	655.3	(1,2);	1	41944		0	NA		0	661909		0	725422
GATAe	GATAe	655.4		2	41945		0	NA		0	NA		0	NA
pannier	pnr	655.5		0	44849		0	1269326		0	661820		0	725350
selenophosphate synthetase 2	Sps2	656.1	(1,2);	1	34397		0	NA		0	NA		0	NA
Selenide,water dikinase	SelD	656.2		2	36587		0	1277983		0	657112		0	GB16405+GB14958
CG5022	CG5022	657.1		0	34398		0	1275668		0	TC004143		0	552521
yurt	yrt	657.2		0	41656		0	1273961		0	TC015016		0	551579
CG34347	CG34347	657.3		0	5740668		0	1281539		0	659041		0	411452
CG5355	CG5355	658.1	(1,2);	1	34421		0	1280128		0	TC013574		0	411896
CG2528	CG2528	658.2		2	35435		0	NA		0	NA		0	NA
CG5188	CG5188	659.1		0	34428		0	1279971		0	663730		0	724879
CG13630	CG13630	659.2		0	42943		0	1274376		0	655631		0	410385
CG5343	CG5343	660.1		0	34429		0	1279068,1276806		0	664405,657807		0	412363,412310
CG17118	CG17118	660.2		0	34478		0	NA		0	NA		0	NA
RluA-1	RluA-1	661.1	(1,2);	1	34438		0	1279080		0	661795		0	410341
RluA-1	RluA-1	661.2		0	34438		0	NA		0	100142228		0	100576531
RluA-2	RluA-2	661.3		2	34440		0	NA		0	NA		0	NA
myosin 31DF	Myo31DF	662.1		0	34445		0	1279578		0	654886		0	552299
myosin 61F	Myo61F	662.2		0	38153		0	5667839+NW_045840.1!8530022!8530771		0	TC011553		0	410960
Dpy-30-like 1	Dpy-30L1	663.1	(1,2);	1	34480		0	NA		0	NA		0	NA
Dpy-30-like 2	Dpy-30L2	663.2		2	38480		0	4578207		0	TC007437		0	725102
Porin2	Porin2	664.1	(1,2);	1	34499		0	NA		0	NA		0	NA
porin	porin	664.2		2	34500		0	1279252		0	662925	(1,2);	1	551325,724641
DNZDHHC/NEW1 zinc finger protein 11	Dnz1	665.1		0	34503		0	1277479		0	NC_007419!251076!252089		0	552426
CG8314	CG8314	665.2		0	36757		0	1274276		0	662327		0	413240
SCAR	SCAR	666.1		0	34519		0	1277451		0	662022		0	410922
GUK-holder	gukh	666.2		0	53563		0	4577455+1281589		0	TC001065+TC001066		0	724518
CG6287	CG6287	667.1		0	34554		0	1279816		0	663218		0	725967
C-terminal binding protein	CtBP	667.2		0	41602		0	1269481		0	660954	(1,2);	1	409158,727369
spalt-related	salr	668.1	(1,2);	1	34568		0	NA		0	NA		0	NA
spalt major	salm	668.2		2	34569		0	1271368		0	TC013501		0	551803
kekkon-2	kek2	669.1		0	34582		0	1280097	(1,2);	1	662080,662117		0	725924
kekkon-1	kek1	669.2		0	34688		0	1280094		0	662007		0	552187
kekkon-3	kek3	669.3		0	34912		0	NA		0	658035		0	NA
CG32445	CG32445	670.1	((((1,2),3),4),5);	3	261603		0	NA		0	NA		0	NA
CG4988	CG4988	670.2		1	34586		0	NA		0	NA		0	NA
CG10467	CG10467	670.3		4	38697		0	1274524	(1,2);	1	660201,659272	((1,2),3);	3	726225,725351,552086
CG32444	CG32444	670.4		2	40406		0	NA		0	NA		0	NA
CG10996	CG10996	670.5		5	32345		0	NA		0	NA		0	NA
extra sexcombs	esc	671.1	(1,2);	1	34595		0	NA		0	NA		0	NA
escl	escl	671.2		2	34611		0	3291747		0	662600		0	551412
CG14934	CG14934	672.1		0	34597		0	NA		0	NA		0	411257,406131
CG14935	CG14935	672.2		0	34598		0	1276685,1279928		0	664120,664111		0	NA
rhodopsin 5	Rh5	673.1		0	34615		0	1279519		0	NA		0	406128
[truncated: 6,786 more rows]
