# Supplementary material for: Genomic signatures of globally enhanced gene duplicate accumulation in the megadiverse higher Diptera fueling intralocus sexual conflict resolution
Source: PeerJ. 2020 Oct 12;8:e10012. doi: 10.7717/peerj.10012 (PMC7560327; doi:10.7717/peerj.10012)
Supplement: Supplemental Information 2 [file peerj-08-10012-s002.xlsx]

## Sheet: Summary results
	case 1:	case 2:	case 3:
	No duplication	Ancestral duplication	Drosophila-specific duplication	Anopheles-specific duplication	Tribolium-specific duplication	Apis-specific duplication	Unresolved
False postives:	38	17	6	9	4	4	59
True postives:	163	43	37	11	8	6	0
False negatives:	42	67	13	12	10	7	0
True negatives:	162	278	349	373	383	388	346
Positive predicted value (TP/(TP+FP)):	0.810945	0.716667	0.860465	0.55	0.666667	0.6	0
Negative predicted value (TN/(TN+FN)):	0.794118	0.805797	0.964088	0.968831	0.974555	0.982278	1
Specificity (TN/(TN+FP)):	0.81	0.942373	0.983099	0.97644	0.989664	0.989796	0.854321
Sensitivity (TP/(TP+FN)):	0.795122	0.390909	0.74	0.478261	0.444444	0.461538	#DIV/0!
Accuracy ((TP+TN)/(TP+TN+FP+FN)):	0.802469	0.792593	0.953086	0.948148	0.965432	0.97284	0.854321
Prevalence ((TP+FN)/(TP+TN+FP+FN)):	0.506173	0.271605	0.123457	0.0567901	0.0444444	0.0320988	0

## Sheet: Raw validation results
#Table S11_InsectDevGenes_2011														Overall_Code								#Dmel_ps_blast2_refined_dataset														Overall_Code								#Validation
#geneid	#primary_group_no	dmel	agam	tcas	amel	family	[case1]1to1_orthology	[case2]ancient_dup	[case3]dmel_dup	[case3]agam_dup	[case3]tcas_dup	[case3]amel_dup	multiple_dup_unresolved	[case1]1to1_orthology	[case2]ancient_dup	[case3]dmel_dup	[case3]agam_dup	[case3]tcas_dup	[case3]amel_dup	multiple_dup_unresolved		#geneid	#primary_group_no	dmel	agam	tcas	amel	family	[case1]1to1_orthology	[case2]ancient_dup	[case3]dmel_dup	[case3]agam_dup	[case3]tcas_dup	[case3]amel_dup	multiple_dup_unresolved	[case1]1to1_orthology	[case2]ancient_dup	[case3]dmel_dup	[case3]agam_dup	[case3]tcas_dup	[case3]amel_dup	multiple_dup_unresolved		[case1]1to1_orthology	[case2]ancient_dup	[case3]dmel_dup	[case3]agam_dup	[case3]tcas_dup	[case3]amel_dup
41273	1.1	1	1	1	1	1	0	1	0	0	0	0	0	0	1	0	0	0	0	0		36372	1163.1	1	1	0	1	1163	0	0	0	1	0	0	0	0	0	0	1	0	0	0		TN	FN	TN	FP	TN	TN
																						36373	1163.2	1	0	1	0
																						41273	1163.3	1	3	2	2
31309	2.1	1	1	1	1	2	0	1	0	0	0	0	0	0	1	0	0	0	0	0		31309	212.1	1	1	1	1	212	0	1	0	0	0	0	0	0	1	0	0	0	0	0		TN	TP	TN	TN	TN	TN
37741	2.2	1	1	1	1	2	0	1	0	0	0	0	0									34594	212.2	1	1	0	1
34594	2.3	1	1	0	1	2	0	1	0	0	0	0	0									37741	212.3	1	1	1	1
32233	2.5	1	1	1	1	2	0	1	0	0	0	0	0	0	1	0	0	0	0	0		32233	499.1	1	1	1	1	499	0	1	0	0	0	0	0	0	1	0	0	0	0	0		TN	TP	TN	TN	TN	TN
																						35107	499.2	1	1	1	1
																						41760	499.3	1	1	1	1
34284	3.1	1	1	1	1	3	0	1	0	0	0	0	0	0	0	1	0	0	0	0		34284	888.1	1	2	2	2	888	0	0	1	0	0	0	0	0	0	1	0	0	0	0		TN	TN	TP	TN	TN	TN
39733	3.2	1	1	1	1	3	0	1	0	0	0	0	0									39733	888.2	1	1	1	1
43644	3.3a	1	1	1	1	3	0	0	1	0	0	0	0									43643	888.3	1	0	0	0
43643	3.3b	1	0	0	0	3	0	0	1	0	0	0	0									43644	888.4	1	0	0	0
35900	4.1	1	1	1	2	4	0	1	0	0	0	0	0	0	1	0	0	0	0	0		33753	815.1	1	1	1	1	815	0	1	0	0	0	0	0	0	1	0	0	0	0	0		TN	TP	TN	TN	TN	TN
35731	4.2	1	1	1	1	4	0	1	0	0	0	0	0									35731	815.2	1	1	1	1
33753	4.3	1	1	1	1	4	0	1	0	0	0	0	0									35900	815.3	1	1	1	1
44096	4.4	1	1	1	1	4	0	1	0	0	0	0	0									41772	815.4	1	1	1	1
41772	4.5	1	1	1	1	4	0	1	0	0	0	0	0									44096	815.5	1	1	1	1
33529	5.1	1	1	3	1	5	0	0	0	0	1	0	0	0	0	0	0	1	0	0		31738	303.1	1	1	1	0	303	0	0	0	0	1	0	0	0	0	0	0	1	0	0		TN	TN	TN	TN	TP	TN
31738	5.2	1	1	1	1	5	0	1	0	0	0	0	0									33529	303.2	1	1	2	2
43725	5.3	1	1	1	1	5	0	1	0	0	0	0	0									42059	303.3	1	0	1	1
42059	5.4	1	0	1	1	5	0	1	0	0	0	0	0									43725	303.4	1	1	1	1
38198	6.1a	1	1	1	1	6	0	0	1	0	0	0	0	0	0	1	0	0	0	0		38198	1385.1	1	1	1	1	1385	0	0	1	0	0	0	0	0	0	1	0	0	0	0		TN	TN	TP	TN	TN	TN
38202	6.1b	1	0	0	0	6	0	0	1	0	0	0	0									38202	1385.2	1	0	0	0
34277	7.1a	1	2	1	1	7	0	0	1	1	0	0	0	0	0	1	1	0	0	0		34277	886.1	1	1	1	1	886	0	0	1	0	0	0	0	0	0	1	0	0	0	0		TN	TN	TP	FN	TN	TN
34280	7.1b	1	0	0	0	7	0	0	1	0	0	0	0									34280	886.2	1	0	0	0
42817	8.1	1	1	1	1	8	0	1	0	0	0	0	0	0	1	0	0	0	0	0		42817	1756.1	1	1	1	1	1756	0	1	0	0	0	0	0	0	1	0	0	0	0	0		TN	TP	TN	TN	TN	TN
43404	8.2	1	1	1	1	8	0	1	0	0	0	0	0									43404	1756.2	1	1	1	1
44642	9.1a	1	1	1	1	9	0	0	1	0	0	0	0	0	0	1	0	0	0	0		42871	1759.1	1	0	0	0	1759	0	0	1	0	0	0	0	0	0	1	0	0	0	0		TN	TN	TP	TN	TN	TN
42871	9.1b	1	0	0	0	9	0	0	1	0	0	0	0									44642	1759.2	1	1	1	1
32257	10.1	1	1	1	1	10	0	1	0	0	0	0	0	0	1	0	0	0	0	0		31872	398.1	1	1	1	1	398	0	1	0	0	0	0	0	0	1	0	0	0	0	0		TN	TP	TN	TN	TN	TN
41020	10.2	1	1	1	1	10	0	1	0	0	0	0	0									32257	398.2	1	1	1	1
32256	10.3	1	1	1	1	10	0	1	0	0	0	0	0									41020	398.3	1	1	1	1
31872	10.4	1	1	1	1	10	0	1	0	0	0	0	0	0	1	0	0	0	0	0		32256	3021	1	1	1	1	3021	1	0	0	0	0	0	0	1	0	0	0	0	0	0		FP	FN	TN	TN	TN	TN
34772	11.1	1	1	1	1	11	0	1	0	0	0	0	0	0	0	0	0	0	1	0		34772	949.1	1	1	1	1	949	0	0	0	0	0	1	0	0	0	0	0	0	1	0		TN	TN	TN	TN	TN	TP
43501	11.2	1	1	1	2	11	0	0	0	0	0	1	0									43501	949.2	1	1	1	2
43558	11.3	1	1	1	1	11	0	1	0	0	0	0	0									43558	949.3	1	1	1	1
44433	12.1	1	1	1	1	12	0	1	0	0	0	0	0	0	1	0	0	0	0	0		40104	6837	1	1	1	1	6837	1	0	0	0	0	0	0	1	0	0	0	0	0	0		FP	FN	TN	TN	TN	TN
40104	12.2	1	1	1	1	12	0	1	0	0	0	0	0	0	1	0	0	0	0	0		44433	8577	1	1	1	1	8577	1	0	0	0	0	0	0	1	0	0	0	0	0	0		FP	FN	TN	TN	TN	TN
45655	13.1	1	1	1	1	13	0	1	0	0	0	0	0	0	1	0	0	0	0	0		42314	1721.1	1	1	1	1	1721	0	1	0	0	0	0	0	0	1	0	0	0	0	0		TN	TP	TN	TN	TN	TN
42314	13.2	1	1	1	1	13	0	1	0	0	0	0	0									45655	1721.2	1	1	1	1
33627	14.1	1	1	1	1	14	0	1	0	0	0	0	0	0	1	0	0	0	0	0		33245	1646.1	1	1	1	1	1646	0	1	0	0	0	0	0	0	1	0	0	0	0	0		TN	TP	TN	TN	TN	TN
40191	14.2	1	1	1	1	14	0	1	0	0	0	0	0									33627	1646.2	1	1	1	1
33245	14.3	1	1	1	1	14	0	1	0	0	0	0	0									36125	1646.3	1	1	1	1
36125	14.4	1	1	1	1	14	0	1	0	0	0	0	0									41302	1646.4	1	1	1	1
																						41441	1646.5	1	1	1	1
														0	1	0	0	0	0	0		40191	6876	1	1	1	1	6876	1	0	0	0	0	0	0	1	0	0	0	0	0	0		FP	FN	TN	TN	TN	TN
44510	15.1a	1	1	1	1	15	0	0	1	0	0	0	0	0	0	1	0	0	0	0		32160	480.1	1	0	0	0	480	0	0	1	0	0	0	0	0	0	1	0	0	0	0		TN	TN	TP	TN	TN	TN
32160	15.1b	1	0	0	0	15	0	0	1	0	0	0	0									38525	480.2	1	0	0	0
38525	15.1c	1	0	0	0	15	0	0	1	0	0	0	0									44510	480.3	1	1	1	1
32162	16.1	1	1	1	1	16	0	1	0	0	0	0	0	0	1	0	0	0	0	0		32162	482.1	1	1	1	1	482	0	1	0	0	0	0	0	0	1	0	0	0	0	0		TN	TP	TN	TN	TN	TN
32447	16.2	1	1	1	1	16	0	1	0	0	0	0	0									32447	482.2	1	1	1	1
32358	17.1a	1	1	2	1	17	0	0	1	0	1	0	0	0	0	1	0	1	0	0		32358	520.1	1	1	2	1	520	0	0	0	0	0	0	1	0	0	0	0	0	0	1		TN	TN	FN	TN	FN	TN
34849	17.1b	1	0	0	0	17	0	0	1	0	0	0	0									34849	520.2	1	0	0	0
32398	18.1	1	1	1	1	18	0	1	0	0	0	0	0	0	1	0	0	0	0	0		2768687	1431.1	1	1	1	1	1431	0	0	0	0	0	0	1	0	0	0	0	0	0	1		TN	FN	TN	TN	TN	TN
32400	18.2	1	1	0	0	18	0	1	0	0	0	0	0									43946	1431.1	1	1	1	1
																						45320	1431.11	1	1	1	1
																						32367	1431.2	1	1	1	1
																						32398	1431.3	1	1	1	1
																						32400	1431.4	1	1	0	0
																						34037	1431.5	1	1	0	0
																						34068	1431.6	1	1	1	1
																						38723	1431.7	1	1	1	1
																						39118	1431.8	1	1	1	1
																						43105	1431.9	1	0	0	0
64875	19.1a	1	1	1	1	19	0	0	1	0	0	0	0	0	0	1	0	0	0	0		32579	568.1	1	0	0	1	568	0	0	1	0	0	0	0	0	0	1	0	0	0	0		TN	TN	TP	TN	TN	TN
32579	19.1b	1	0	0	0	19	0	0	1	0	0	0	0									64875	568.2	1	1	1	0
32724	20.1a	1	1	1	1	20	0	0	1	0	0	0	0	0	0	1	0	0	0	0		32724	9384	1	1	1	1	9384	1	0	0	0	0	0	0	1	0	0	0	0	0	0		FP	TN	FN	TN	TN	TN
32723	20.1b	1	0	0	0	20	0	0	1	0	0	0	0
32976	21.1a	1	1	1	1	21	0	0	1	0	0	0	0	0	0	1	0	0	0	0		32976	3424	1	1	1	1	3424	1	0	0	0	0	0	0	1	0	0	0	0	0	0		FP	TN	FN	TN	TN	TN
32975	21.1b	1	0	0	0	21	0	0	1	0	0	0	0
32979	22.1	1	1	1	1	22	0	1	0	0	0	0	0	0	1	0	0	0	0	0		31816	356.1	1	1	1	1	356	0	1	0	0	0	0	0	0	1	0	0	0	0	0		TN	TP	TN	TN	TN	TN
31816	22.2	1	1	1	1	22	0	1	0	0	0	0	0									32979	356.2	1	1	1	1
33474	23.1	1	0	1	1	23	0	1	0	0	0	0	0	0	1	0	0	0	0	0		33432	1823.1	1	1	1	1	1823	0	0	0	0	0	0	1	0	0	0	0	0	0	1		TN	FN	TN	TN	TN	TN
43826	23.2	1	1	1	1	23	0	1	0	0	0	0	0									33474	1823.2	1	0	1	1
																						37778	1823.3	1	2	2	1
																						43804	1823.4	1	1	1	1
																						43811	1823.5	1	1	1	1
																						43826	1823.6	1	1	1	1
																						46000	1823.7	1	0	0	0
38231	24.1	1	1	1	1	24	0	1	0	0	0	0	0	0	1	0	0	0	0	0		31166	9294	1	1	1	1	9294	1	0	0	0	0	0	0	1	0	0	0	0	0	0		FP	FN	TN	TN	TN	TN
32746	24.2	1	1	1	1	24	0	1	0	0	0	0	0	0	1	0	0	0	0	0		32746	9385	1	1	1	1	9385	1	0	0	0	0	0	0	1	0	0	0	0	0	0		FP	FN	TN	TN	TN	TN
38418	24.3	1	1	1	1	24	0	1	0	0	0	0	0	0	1	0	0	0	0	0		36542	9509	1	1	1	1	9509	1	0	0	0	0	0	0	1	0	0	0	0	0	0		FP	FN	TN	TN	TN	TN
31166	24.4	1	1	1	1	24	0	1	0	0	0	0	0	0	1	0	0	0	0	0		38231	9688	1	1	1	1	9688	1	0	0	0	0	0	0	1	0	0	0	0	0	0		FP	FN	TN	TN	TN	TN
36542	24.5	1	1	1	1	24	0	1	0	0	0	0	0	0	1	0	0	0	0	0		38418	9691	1	1	1	1	9691	1	0	0	0	0	0	0	1	0	0	0	0	0	0		FP	FN	TN	TN	TN	TN
33619	25.1	1	2	1	1	25	0	0	0	1	0	0	0	0	1	0	0	0	0	0		33613	796.1	1	0	0	0	796	0	0	0	0	0	0	1	0	0	0	0	0	0	1		TN	FN	TN	TN	TN	TN
33613	25.2	1	0	0	0	25	0	1	0	0	0	0	0									33619	796.2	1	2	1	1
34569	26.1a	1	1	1	1	26	0	0	1	0	0	0	0	0	0	1	0	0	0	0		34568	921.1	1	0	0	0	921	0	0	1	0	0	0	0	0	0	1	0	0	0	0		TN	TN	TP	TN	TN	TN
34568	26.1b	1	0	0	0	26	0	0	1	0	0	0	0									34569	921.2	1	1	1	1
35368	27.1	1	1	1	1	27	0	1	0	0	0	0	0	0	1	0	0	0	0	0		35368	1037.1	1	1	1	1	1037	0	0	0	0	0	0	1	0	0	0	0	0	0	1		TN	FN	TN	TN	TN	TN
44885	27.2	1	1	1	1	27	0	1	0	0	0	0	0									44885	1037.2	1	1	2	2
36240	28.1	1	1	1	1	28	0	1	0	0	0	0	0	0	1	0	0	0	0	0		36239	1146.1	1	1	1	1	1146	0	1	0	0	0	0	0	0	1	0	0	0	0	0		TN	TP	TN	TN	TN	TN
36239	28.2	1	1	1	1	28	0	1	0	0	0	0	0									36240	1146.2	1	1	1	1
36390	29.1	1	1	1	1	29	0	1	0	0	0	0	0	0	1	0	0	0	0	0		31571	1548.1	1	1	1	1	1548	0	0	0	0	0	0	1	0	0	0	0	0	0	1		TN	FN	TN	TN	TN	TN
39744	29.2	1	1	1	1	29	0	1	0	0	0	0	0									33505	1548.2	1	0	1	1
																						33507	1548.3	1	2	1	2
																						34311	1548.4	1	1	1	1
																						36390	1548.5	1	1	1	1
																						39744	1548.6	1	1	1	1
																						40111	1548.7	1	0	0	0
																						40170	1548.8	1	1	1	1
																						44811	1548.9	1	1	1	1
38116	30.1a	1	1	1	1	30	0	0	1	0	0	0	0	0	0	1	0	0	0	0		38116	1376.1	1	1	0	0	1376	0	0	1	0	0	0	0	0	0	1	0	0	0	0		TN	TN	TP	TN	TN	TN
44254	30.1b	1	0	0	0	30	0	0	1	0	0	0	0									44254	1376.2	1	0	1	1
38469	31.1	1	1	1	1	31	0	1	0	0	0	0	0	0	1	0	0	0	0	0		31991	1136.1	1	1	1	1	1136	0	0	0	0	0	0	1	0	0	0	0	0	0	1		TN	FN	TN	TN	TN	TN
38468	31.2	1	1	1	1	31	0	1	0	0	0	0	0									40879	1136.1	1	2	1	1
38072	31.3	1	1	1	1	31	0	1	0	0	0	0	0									35132	1136.2	1	0	1	1
																						35135	1136.3	1	1	1	1
																						36170	1136.4	1	1	0	0
																						37785	1136.5	1	1	1	1
																						38072	1136.6	1	1	1	1
																						38468	1136.7	1	0	0	0
																						38469	1136.8	1	2	1	2
																						38713	1136.9	1	1	1	1
39419	32.1a	1	1	1	1	32	0	0	1	0	0	0	0	0	0	1	0	0	0	0		39418	1493.1	1	0	0	0	1493	0	0	1	0	0	0	0	0	0	1	0	0	0	0		TN	TN	TP	TN	TN	TN
39418	32.1b	1	0	0	0	32	0	0	1	0	0	0	0									39419	1493.2	1	1	1	1
39439	33.1a	1	1	1	1	33	0	0	1	0	0	0	0	0	0	1	0	0	0	0		39439	1494.1	1	1	1	1	1494	0	0	1	0	0	0	0	0	0	1	0	0	0	0		TN	TN	TP	TN	TN	TN
39440	33.1b	1	0	0	0	33	0	0	1	0	0	0	0									39440	1494.2	1	0	0	0
39441	33.2	1	1	1	1	33	0	1	0	0	0	0	0									39441	1494.3	1	1	1	1
39491	34.1a	1	1	1	1	34	0	0	1	0	0	0	0	0	0	1	1	0	0	0		35768	1091.1	1	1	1	1	1091	0	0	0	0	0	0	1	0	0	0	0	0	0	1		TN	TN	FN	FN	TN	TN
39493	34.1b	1	0	0	0	34	0	0	1	0	0	0	0									39491	1091.2	1	2	1	1
5740472	34.2	1	2	1	1	34	0	0	0	1	0	0	0									39493	1091.3	1	0	0	0
																						5740472	1091.4	1	2	1	1
42632	35.1	1	1	1	1	35	0	1	0	0	0	0	0	0	1	0	0	0	0	0		38846	1440.1	1	1	1	1	1440	0	1	0	0	0	0	0	0	1	0	0	0	0	0		TN	TP	TN	TN	TN	TN
38846	35.2	1	1	1	1	35	0	1	0	0	0	0	0									42632	1440.2	1	1	1	1
39536	36.1a	1	1	1	1	36	0	0	1	0	0	0	0	0	0	1	0	0	0	0		35042	991.1	1	1	1	1	991	0	0	1	0	0	0	0	0	0	1	0	0	0	0		TN	TN	TP	TN	TN	TN
40124	36.1b	1	0	0	0	36	0	0	1	0	0	0	0									39536	991.2	1	1	1	1
																						40124	991.3	1	0	0	0
39567	37.1	1	1	1	1	37	0	1	0	0	0	0	0	0	0	0	0	1	0	0		39567	1507.1	1	0	0	1	1507	0	0	0	0	0	0	1	0	0	0	0	0	0	1		TN	TN	TN	TN	FN	TN
39569	37.2	1	1	1	1	37	0	1	0	0	0	0	0									39569	1507.2	1	1	1	1
39570	37.3	1	1	2	1	37	0	0	0	0	1	0	0									39570	1507.3	1	1	0	1
44275	37.4	1	1	1	1	37	0	1	0	0	0	0	0									44275	1507.4	1	1	1	1
39659	38.1a	1	1	1	1	38	0	0	1	0	0	0	0	0	0	1	0	0	0	0		318725	401.1	1	0	0	0	401	0	0	1	0	0	0	0	0	0	1	0	0	0	0		TN	TN	TP	TN	TN	TN
42692	38.1b	1	0	0	0	38	0	0	1	0	0	0	0									39659	401.2	1	1	1	1
318725	38.1c	1	0	0	0	38	0	0	1	0	0	0	0									42692	401.3	1	0	0	0
40442	39.1	1	1	1	1	39	0	1	0	0	0	0	0	0	1	0	0	0	0	0		40442	1584.1	1	0	0	0	1584	0	0	0	0	0	0	1	0	0	0	0	0	0	1		TN	FN	TN	TN	TN	TN
45884	39.2	1	1	1	1	39	0	1	0	0	0	0	0									45884	1584.2	1	3	2	3
40660	40.1	1	1	1	1	40	0	1	0	0	0	0	0	0	1	0	0	0	0	0		31221	190.1	1	1	1	1	190	0	1	0	0	0	0	0	0	1	0	0	0	0	0		TN	TP	TN	TN	TN	TN
31221	40.2	1	1	1	1	40	0	1	0	0	0	0	0									40660	190.2	1	1	1	1
41602	41.1	1	1	1	1	41	0	1	0	0	0	0	0	0	1	0	0	0	0	0		34554	920.1	1	1	1	1	920	0	0	0	0	0	1	0	0	0	0	0	0	1	0		TN	FN	TN	TN	TN	FP
34554	41.2	1	1	1	1	41	0	1	0	0	0	0	0									41602	920.2	1	1	1	2
42115	42.1	1	1	1	1	42	0	1	0	0	0	0	0	0	1	0	0	0	0	0		42115	7744	1	1	1	1	7744	1	0	0	0	0	0	0	1	0	0	0	0	0	0		FP	FN	TN	TN	TN	TN
42510	42.2	1	1	1	1	42	0	1	0	0	0	0	0	0	1	0	0	0	0	0		42510	7925	1	1	1	1	7925	1	0	0	0	0	0	0	1	0	0	0	0	0	0		FP	FN	TN	TN	TN	TN
42504	43.1	1	1	1	1	43	0	1	0	0	0	0	0	0	1	0	0	0	0	0		38516	9700	1	1	1	1	9700	1	0	0	0	0	0	0	1	0	0	0	0	0	0		FP	FN	TN	TN	TN	TN
38516	43.2	1	1	1	1	43	0	1	0	0	0	0	0	0	1	0	0	0	0	0		42504	9881	1	1	1	1	9881	1	0	0	0	0	0	0	1	0	0	0	0	0	0		FP	FN	TN	TN	TN	TN
42542	44.1a	1	1	1	1	44	0	0	1	0	0	0	0	0	0	1	0	0	0	0		42541	1733.1	1	0	0	0	1733	0	0	1	0	0	0	0	0	0	1	0	0	0	0		TN	TN	TP	TN	TN	TN
42541	44.1b	1	0	0	0	44	0	0	1	0	0	0	0									42542	1733.2	1	1	1	1
42549	45.1	1	1	2	2	45	0	1	0	0	0	0	0	0	1	0	0	0	0	0		42549	9886	1	1	2	2	9886	0	0	0	0	0	0	1	0	0	0	0	0	0	1		TN	FN	TN	TN	TN	TN
41809	45.2	1	0	0	0	45	0	1	0	0	0	0	0
44029	46.1a	1	1	1	1	46	0	0	1	0	0	0	0	0	0	1	0	0	0	0		34667	934.1	1	0	0	0	934	0	0	1	0	0	0	0	0	0	1	0	0	0	0		TN	TN	TP	TN	TN	TN
34667	46.1b	1	0	0	0	46	0	0	1	0	0	0	0									44029	934.2	1	1	1	1
42752	47.1	1	1	1	1	47	0	1	0	0	0	0	0	0	1	0	0	0	0	0		39019	1456.1	1	1	1	1	1456	0	1	0	0	0	0	0	0	1	0	0	0	0	0		TN	TP	TN	TN	TN	TN
39019	47.2	1	1	1	1	47	0	1	0	0	0	0	0									42752	1456.2	1	1	1	1
43288	48.1	1	1	1	1	48	0	1	0	0	0	0	0	0	1	0	0	0	0	0		31254	943.1	1	1	1	1	943	0	1	0	0	0	0	0	0	1	0	0	0	0	0		TN	TP	TN	TN	TN	TN
41168	48.2	1	1	1	1	48	0	1	0	0	0	0	0									34709	943.2	1	1	1	1
34709	48.3	1	1	1	1	48	0	1	0	0	0	0	0									41168	943.3	1	1	1	1
																						43288	943.4	1	1	1	1
246538	49.1	1	1	0	0	49	0	1	0	0	0	0	0	0	1	0	0	0	0	0		246538	51.1	1	0	0	0	51	0	0	0	0	0	0	1	0	0	0	0	0	0	1		TN	FN	TN	TN	TN	TN
36846	49.2	1	1	1	1	49	0	1	0	0	0	0	0									34192	51.2	1	1	2	1
37007	49.3	1	1	1	1	49	0	1	0	0	0	0	0									36846	51.3	1	2	1	1
34192	49.4	1	1	1	1	49	0	1	0	0	0	0	0									37007	51.4	1	1	0	0
37066	49.5	1	1	1	1	49	0	1	0	0	0	0	0									37066	51.5	1	1	1	1
43812	50.1	1	1	1	1	50	0	1	0	0	0	0	0	0	1	0	0	0	0	0		43812	1825.1	1	1	0	0	1825	0	1	0	0	0	0	0	0	1	0	0	0	0	0		TN	TP	TN	TN	TN	TN
43833	50.2	1	1	1	1	50	0	1	0	0	0	0	0									43825	1825.2	1	1	1	1
																						43833	1825.3	1	1	2	2
35343	51.1	1	1	1	1	51	0	1	0	0	0	0	0	0	1	0	0	0	0	0		32083	1035.1	1	1	1	1	1035	0	1	0	0	0	0	0	0	1	0	0	0	0	0		TN	TP	TN	TN	TN	TN
42567	51.2	1	1	1	1	51	0	1	0	0	0	0	0									35343	1035.2	1	1	1	1
36176	51.3	1	1	1	1	51	0	1	0	0	0	0	0									36176	1035.3	1	1	1	1
44861	51.4	1	1	1	1	51	0	1	0	0	0	0	0									39213	1035.4	1	1	1	1
32083	51.5	1	1	1	1	51	0	1	0	0	0	0	0									42567	1035.5	1	1	1	1
39213	51.6	1	1	1	1	51	0	1	0	0	0	0	0									43003	1035.6	1	1	1	1
																						44861	1035.7	1	1	1	1
45973	52.1	1	1	1	1	52	0	1	0	0	0	0	0	0	1	0	0	0	0	0		45973	8652	1	1	1	1	8652	1	0	0	0	0	0	0	1	0	0	0	0	0	0		FP	FN	TN	TN	TN	TN
45994	52.2	1	0	1	0	52	0	1	0	0	0	0	0
32021	53.1a	1	1	1	1	53	0	0	1	0	0	0	0	0	0	1	0	0	0	0		32021	452.1	1	1	1	0	452	0	0	1	0	0	0	0	0	0	1	0	0	0	0		TN	TN	TP	TN	TN	TN
32715	53.1b	1	0	0	0	53	0	0	1	0	0	0	0									32715	452.2	1	0	0	0
35339	53.2	1	1	1	1	53	0	1	0	0	0	0	0									35339	452.3	1	1	1	1
35523	53.3	1	1	1	1	53	0	1	0	0	0	0	0									35523	452.4	1	1	1	1
																						41919	452.5	1	1	1	1
33507	54.1	1	1	1	1	54	0	1	0	0	0	0	0	0	1	0	0	0	0	0		31571	1548.1	1	1	1	1	1548	0	0	0	0	0	0	1	0	0	0	0	0	0	1		TN	FN	TN	TN	TN	TN
																						33505	1548.2	1	0	1	1
																						33507	1548.3	1	2	1	2
																						34311	1548.4	1	1	1	1
																						36390	1548.5	1	1	1	1
																						39744	1548.6	1	1	1	1
																						40111	1548.7	1	0	0	0
																						40170	1548.8	1	1	1	1
																						44811	1548.9	1	1	1	1
43283	55.1	1	1	1	1	55	0	1	0	0	0	0	0	0	1	0	0	0	0	0		43283	8246	1	1	2	1	8246	0	0	0	0	1	0	0	0	0	0	0	1	0	0		TN	FN	TN	TN	FP	TN
32039	56.1	1	1	1	1	56	0	1	0	0	0	0	0	0	1	0	0	0	0	0		32039	455.1	1	1	1	1	455	0	1	0	0	0	0	0	0	1	0	0	0	0	0		TN	TP	TN	TN	TN	TN
53425	56.2	1	1	1	1	56	0	1	0	0	0	0	0									53425	455.2	1	1	1	1
44095	57.1	1	1	1	1	57	0	1	0	0	0	0	0	0	1	0	0	0	0	0		41431	1658.1	1	1	1	1	1658	0	1	0	0	0	0	0	0	1	0	0	0	0	0		TN	TP	TN	TN	TN	TN
41431	57.2	1	1	1	1	57	0	1	0	0	0	0	0									44095	1658.2	1	1	1	1
37778	58.1	1	2	2	1	58	0	1	0	0	0	0	0	0	1	0	0	0	0	0		33432	1823.1	1	1	1	1	1823	0	0	0	0	0	0	1	0	0	0	0	0	0	1		TN	FN	TN	TN	TN	TN
46000	58.2	1	0	0	0	58	0	1	0	0	0	0	0									33474	1823.2	1	0	1	1
33432	58.3	1	1	1	1	58	0	1	0	0	0	0	0									37778	1823.3	1	2	2	1
																						43804	1823.4	1	1	1	1
																						43811	1823.5	1	1	1	1
																						43826	1823.6	1	1	1	1
																						46000	1823.7	1	0	0	0
35001	59.1	1	1	1	1	59	0	1	0	0	0	0	0	0	1	0	0	0	0	0		32627	1196.1	1	2	1	1	1196	0	0	0	1	0	0	0	0	0	0	1	0	0	0		TN	FN	TN	FP	TN	TN
42853	59.2	1	1	1	2	59	0	0	0	0	0	1	0									35001	1196.2	1	1	1	1
36653	59.3	1	1	1	1	59	0	1	0	0	0	0	0									36653	1196.3	1	1	1	1
														0	0	0	0	0	1	0		42853	8069	1	1	1	2	8069	0	0	0	0	0	1	0	0	0	0	0	0	1	0		TN	TN	TN	TN	TN	TP
42160	60.1a	1	1	1	1	60	0	0	1	0	0	0	0	0	0	1	0	0	0	0		39564	1827.1	1	0	0	0	1827	0	0	0	0	0	0	1	0	0	0	0	0	0	1		TN	TN	FN	TN	TN	TN
39564	60.1b	1	0	0	0	60	0	0	1	0	0	0	0									42160	1827.2	1	1	1	1
43026	60.2	1	1	1	1	60	0	1	0	0	0	0	0									43026	1827.3	1	1	1	2
43875	60.3	1	1	1	1	60	0	1	0	0	0	0	0									43875	1827.4	1	1	1	1
31802	61.1	1	1	1	1	61	0	1	0	0	0	0	0	0	1	0	0	0	0	0		31802	9322	1	1	2	2	9322	0	0	0	0	0	0	1	0	0	0	0	0	0	1		TN	FN	TN	TN	TN	TN
37038	62.1	1	1	1	1	62	0	1	0	0	0	0	0	0	1	0	0	0	0	0		36064	4829	1	1	1	1	4829	1	0	0	0	0	0	0	1	0	0	0	0	0	0		FP	FN	TN	TN	TN	TN
36064	62.2	1	1	1	1	62	0	1	0	0	0	0	0	0	1	0	0	0	0	0		37038	5269	1	1	1	1	5269	1	0	0	0	0	0	0	1	0	0	0	0	0	0		FP	FN	TN	TN	TN	TN
31227	63.1a	1	1	1	1	63	0	0	1	0	0	0	0	0	0	1	0	0	0	0		31227	191.1	1	1	1	0	191	0	0	1	0	0	0	0	0	0	1	0	0	0	0		TN	TN	TP	TN	TN	TN
31637	63.1b	1	0	0	0	63	0	0	1	0	0	0	0									31637	191.2	1	0	0	0
31813	64.1	1	1	1	1	64	0	1	0	0	0	0	0	0	0	0	1	0	1	0		31813	1490.1	1	1	1	1	1490	0	0	0	1	0	0	0	0	0	0	1	0	0	0		TN	TN	TN	TP	TN	FN
35184	64.2	1	1	1	1	64	0	1	0	0	0	0	0									35147	1490.2	1	1	1	1
35509	64.3	1	1	1	1	64	0	1	0	0	0	0	0									35184	1490.3	1	1	1	1
35147	64.5	1	1	1	1	64	0	1	0	0	0	0	0									35509	1490.4	1	2	2	2
38451	64.6	1	3	1	2	64	0	0	0	1	0	1	0									38451	1490.5	1	3	1	2
39405	64.7	1	1	1	0	64	0	1	0	0	0	0	0									39405	1490.6	1	1	1	0
39406	64.8	1	1	1	1	64	0	1	0	0	0	0	0									39406	1490.7	1	1	1	1
37203	65.1	1	1	1	1	65	0	1	0	0	0	0	0	0	1	0	0	0	0	0		37203	1256.1	1	1	1	1	1256	0	0	0	1	0	0	0	0	0	0	1	0	0	0		TN	FN	TN	FP	TN	TN
44030	65.2	1	1	1	1	65	0	1	0	0	0	0	0									37247	1256.2	1	1	1	1
37893	65.3	1	1	1	1	65	0	1	0	0	0	0	0									37893	1256.3	1	1	1	1
37247	65.4	1	1	1	1	65	0	1	0	0	0	0	0									42064	1256.4	1	1	1	1
42064	65.5	1	1	1	1	65	0	1	0	0	0	0	0									44030	1256.5	1	2	1	1
32674	66.1	1	2	1	1	66	0	0	0	1	0	0	0	0	0	0	1	0	0	0		32674	1236.1	1	2	1	1	1236	0	0	0	1	0	0	0	0	0	0	1	0	0	0		TN	TN	TN	TP	TN	TN
32874	66.2	1	1	1	1	66	0	1	0	0	0	0	0									32874	1236.2	1	1	1	0
42672	66.3	1	1	1	1	66	0	1	0	0	0	0	0									37037	1236.3	1	1	1	1
37037	66.4	1	1	1	1	66	0	1	0	0	0	0	0									42672	1236.4	1	1	1	1
34648	67.1a	1	1	1	1	67	0	0	1	0	0	0	0	0	0	1	0	0	0	0		250811	81.1	1	0	0	0	81	0	0	1	0	0	0	0	0	0	1	0	0	0	0		TN	TN	TP	TN	TN	TN
250811	67.1b	1	0	0	0	67	0	0	1	0	0	0	0									34648	81.2	1	1	1	0
39527	67.2	1	1	1	1	67	0	1	0	0	0	0	0									39527	81.3	1	1	1	1
34831	68.1	1	1	1	1	68	0	1	0	0	0	0	0	0	0	0	1	0	0	0		32771	639.1	1	1	1	1	639	0	0	0	0	0	0	1	0	0	0	0	0	0	1		TN	TN	TN	FN	TN	TN
3885567	68.2	1	1	1	1	68	0	1	0	0	0	0	0									34831	639.2	1	0	1	1
32771	68.3	1	1	1	1	68	0	1	0	0	0	0	0									38032	639.3	1	1	1	0
38070	68.4	1	1	1	1	68	0	1	0	0	0	0	0									38070	639.4	1	1	1	1
38032	68.5	1	1	1	0	68	0	1	0	0	0	0	0									3885567	639.5	1	1	1	0
43415	68.6	1	2	1	1	68	0	0	0	1	0	0	0									43415	639.6	1	1	1	1
38738	69.1	1	1	1	1	69	0	1	0	0	0	0	0	0	1	0	0	0	0	0		35691	9478	1	1	2	2	9478	0	0	0	0	0	0	1	0	0	0	0	0	0	1		TN	FN	TN	TN	TN	TN
35691	69.2	1	1	1	1	69	0	1	0	0	0	0	0	0	1	0	0	0	0	0		38738	9708	1	1	1	1	9708	1	0	0	0	0	0	0	1	0	0	0	0	0	0		FP	FN	TN	TN	TN	TN
35293	70.1	1	1	1	1	70	0	1	0	0	0	0	0	0	1	0	0	0	0	0		35293	1030.1	1	1	1	1	1030	0	1	0	0	0	0	0	0	1	0	0	0	0	0		TN	TP	TN	TN	TN	TN
36718	70.2	1	1	1	1	70	0	1	0	0	0	0	0									36718	1030.2	1	0	1	1
36876	70.3	1	1	1	1	70	0	1	0	0	0	0	0									36876	1030.3	1	2	1	1
43310	70.4	1	1	1	1	70	0	1	0	0	0	0	0									43310	1030.4	1	1	1	0
34780	71.1a	1	2	1	1	71	0	0	1	0	0	0	0	0	0	1	1	0	0	0		2768679	97.1	1	0	0	0	97	0	0	1	0	0	0	0	0	0	1	0	0	0	0		TN	TN	TP	FN	TN	TN
42866	71.1b	1	0	0	0	71	0	0	1	0	0	0	0									3354888	97.2	1	1	1	1
2768679	71.1c	1	0	0	0	71	0	0	1	0	0	0	0									34780	97.3	1	0	1	1
44801	71.2	1	2	1	1	71	0	0	0	1	0	0	0									38890	97.4	1	1	1	1
3354888	71.3	1	1	1	1	71	0	1	0	0	0	0	0									42866	97.5	1	0	0	0
38890	71.4	1	1	1	1	71	0	1	0	0	0	0	0									44801	97.6	1	2	1	1
34688	72.1	1	1	1	1	72	0	1	0	0	0	0	0	0	0	1	0	0	0	0		32930	662.1	1	1	1	1	662	0	0	1	0	0	0	0	0	0	1	0	0	0	0		TN	TN	TP	TN	TN	TN
34582	72.2	1	1	2	1	72	0	0	0	0	1	0	0									34718	662.2	1	0	0	0
34912	72.3	1	0	1	0	72	0	1	0	0	0	0	0									43552	662.3	1	1	1	1
43729	72.4	1	1	1	1	72	0	1	0	0	0	0	0									43729	662.4	1	1	1	1
32930	72.5a	1	1	1	1	72	0	0	1	0	0	0	0	0	0	0	0	1	0	0		34582	922.1	1	1	2	1	922	0	0	0	0	0	0	1	0	0	0	0	0	0	1		TN	TN	TN	TN	FN	TN
34718	72.5b	1	0	0	0	72	0	0	1	0	0	0	0									34688	922.2	1	1	1	1
																						34912	922.3	1	0	1	0
32656	73.1a	1	1	1	0	73	0	0	1	0	0	0	0	0	0	1	0	0	0	0		246501	39.1	1	0	0	0	39	0	0	0	0	0	0	1	0	0	0	0	0	0	1		TN	TN	FN	TN	TN	TN
35393	73.1b	1	0	0	0	73	0	0	1	0	0	0	0									326182	39.2	1	0	0	0
326182	73.1c	1	0	0	0	73	0	0	1	0	0	0	0									32656	39.3	1	1	0	0
246501	73.1d	1	0	0	0	73	0	0	1	0	0	0	0									35215	39.4	1	1	1	1
35215	73.2	1	1	1	1	73	0	1	0	0	0	0	0									35393	39.5	1	0	0	0
38700	74.1	1	1	1	1	74	0	1	0	0	0	0	0	0	1	0	0	0	0	0		33229	703.1	1	1	1	1	703	0	1	0	0	0	0	0	0	1	0	0	0	0	0		TN	TP	TN	TN	TN	TN
33229	74.2	1	1	1	1	74	0	1	0	0	0	0	0									38700	703.2	1	1	1	1
43236	74.3	1	1	1	1	74	0	1	0	0	0	0	0									42757	703.3	1	1	1	1
42757	74.4	1	1	1	1	74	0	1	0	0	0	0	0									42952	703.4	1	1	1	1
42952	74.5	1	1	1	1	74	0	1	0	0	0	0	0									43236	703.5	1	1	1	1
40232	75.1	1	1	1	1	75	0	1	0	0	0	0	0	0	1	0	0	0	0	0		40232	1561.1	1	1	1	1	1561	0	1	0	0	0	0	0	0	1	0	0	0	0	0		TN	TP	TN	TN	TN	TN
40384	75.2	1	1	1	1	75	0	1	0	0	0	0	0									40384	1561.2	1	1	1	1
31292	76.1	1	1	1	1	76	0	1	0	0	0	0	0	0	1	0	0	0	0	0		31290	209.1	1	0	0	0	209	0	0	0	0	0	0	1	0	0	0	0	0	0	1		TN	FN	TN	TN	TN	TN
31290	76.2	1	1	0	0	76	0	1	0	0	0	0	0									31292	209.2	1	2	1	1
45976	77.1	1	1	1	1	77	0	1	0	0	0	0	0	0	1	0	0	0	0	0		42130	1713.1	1	1	1	1	1713	0	1	0	0	0	0	0	0	1	0	0	0	0	0		TN	TP	TN	TN	TN	TN
42130	77.2	1	1	1	1	77	0	1	0	0	0	0	0									45976	1713.2	1	1	1	1
326198	78.1	1	1	1	1	78	0	1	0	0	0	0	0	0	1	0	0	0	0	0		326198	602.1	1	1	1	1	602	0	0	1	0	0	0	0	0	0	1	0	0	0	0		TN	FN	FP	TN	TN	TN
35253	78.2	1	1	0	0	78	0	1	0	0	0	0	0									35253	602.2	1	0	0	0
48844	79.1	1	1	1	1	79	0	1	0	0	0	0	0	0	1	0	0	0	0	0		38915	1447.1	1	0	0	0	1447	0	0	1	0	0	0	0	0	0	1	0	0	0	0		TN	FN	FP	TN	TN	TN
38915	79.2	1	1	0	0	79	0	1	0	0	0	0	0									48844	1447.2	1	1	1	1
31399	80.1	1	1	1	1	80	0	1	0	0	0	0	0	0	1	0	0	0	0	0		31399	2342	1	1	1	1	2342	1	0	0	0	0	0	0	1	0	0	0	0	0	0		FP	FN	TN	TN	TN	TN
36554	81.1	1	2	1	1	81	0	0	0	1	0	0	0	0	0	0	1	0	0	0		32088	1603.1	1	1	1	1	1603	0	0	0	1	0	0	0	0	0	0	1	0	0	0		TN	TN	TN	TP	TN	TN
41390	81.2	1	1	1	1	81	0	1	0	0	0	0	0									36554	1603.2	1	2	1	1
38945	81.3	1	1	1	1	81	0	1	0	0	0	0	0									38945	1603.3	1	1	1	1
32088	81.4	1	1	1	1	81	0	1	0	0	0	0	0									40704	1603.4	1	1	1	1
																						41390	1603.5	1	1	1	1
32543	82.1	1	1	1	1	82	0	1	0	0	0	0	0	0	1	0	0	0	0	0		32543	557.1	1	1	1	1	557	0	1	0	0	0	0	0	0	1	0	0	0	0	0		TN	TP	TN	TN	TN	TN
38062	82.2	1	1	1	1	82	0	1	0	0	0	0	0									38062	557.2	1	1	1	1
39039	83.1a	1	2	1	1	83	0	0	1	1	0	0	0	0	0	1	1	0	0	0		31379	230.1	1	0	1	1	230	0	0	1	0	0	0	0	0	0	1	0	0	0	0		TN	TN	TP	FN	TN	TN
39038	83.1b	1	0	0	0	83	0	0	1	0	0	0	0									39036	230.2	1	0	0	0
39036	83.1c	1	0	0	0	83	0	0	1	0	0	0	0									39038	230.3	1	2	0	0
31379	83.2	1	1	1	1	83	0	1	0	0	0	0	0									39039	230.4	1	0	1	1
31778	83.3	1	1	1	1	83	0	1	0	0	0	0	0	0	0	0	1	0	0	0		31778	820.1	1	1	1	1	820	0	1	0	0	0	0	0	0	1	0	0	0	0	0		TN	FP	TN	FN	TN	TN
33769	83.4	1	3	2	2	83	0	0	0	1	0	0	0									33769	820.2	1	0	0	0
33770	83.5	1	0	0	0	83	0	1	0	0	0	0	0									33770	820.3	1	2	2	2
39349	83.6	1	1	1	1	83	0	1	0	0	0	0	0	0	1	0	0	0	0	0		39349	9741	1	1	1	1	9741	1	0	0	0	0	0	0	1	0	0	0	0	0	0		FP	FN	TN	TN	TN	TN
31912	84.1	1	0	1	1	84	0	1	0	0	0	0	0	0	1	0	0	0	0	0		31912	441.1	1	1	0	0	441	0	0	0	0	0	0	1	0	0	0	0	0	0	1		TN	FN	TN	TN	TN	TN
31913	84.2	1	1	1	1	84	0	1	0	0	0	0	0									31913	441.2	1	1	1	1
42882	84.3	1	1	1	1	84	0	1	0	0	0	0	0									42882	441.3	1	1	1	1
33224	84.4	1	1	1	1	84	0	1	0	0	0	0	0	0	1	0	0	0	0	0		33224	9399	1	1	1	1	9399	1	0	0	0	0	0	0	1	0	0	0	0	0	0		FP	FN	TN	TN	TN	TN
36614	85.1	1	1	1	1	85	0	1	0	0	0	0	0	0	1	0	0	0	0	0		36614	1193.1	1	1	1	1	1193	0	1	0	0	0	0	0	0	1	0	0	0	0	0		TN	TP	TN	TN	TN	TN
3772101	85.2	1	1	1	1	85	0	1	0	0	0	0	0									37198	1193.2	1	1	1	1
37198	85.3	1	1	1	1	85	0	1	0	0	0	0	0									3772101	1193.3	1	1	1	1
35078	86.1	1	1	1	1	86	0	1	0	0	0	0	0	0	1	0	0	0	0	0		31970	446.1	1	0	0	0	446	0	0	1	0	0	0	0	0	0	1	0	0	0	0		TN	FN	FP	TN	TN	TN
38993	86.2	1	1	1	1	86	0	1	0	0	0	0	0									35078	446.2	1	1	1	1
53554	86.3	1	1	1	1	86	0	1	0	0	0	0	0									38993	446.3	1	1	1	1
31970	86.4	1	1	1	1	86	0	1	0	0	0	0	0									53554	446.4	1	1	1	1
33078	87.1	1	1	1	1	87	0	1	0	0	0	0	0	0	1	0	0	0	0	0		33078	685.1	1	2	1	1	685	0	0	0	0	0	0	1	0	0	0	0	0	0	1		TN	FN	TN	TN	TN	TN
35101	87.2	1	1	0	0	87	0	1	0	0	0	0	0									35101	685.2	1	0	0	0
																						47998	685.3	1	1	1	1
34669	88.1a	1	1	1	1	88	0	0	1	0	0	0	0	0	0	1	0	0	0	0		34669	935.1	1	1	1	1	935	0	0	1	0	0	0	0	0	0	1	0	0	0	0		TN	TN	TP	TN	TN	TN
34673	88.1b	1	0	0	0	88	0	0	1	0	0	0	0									34673	935.2	1	0	0	0
38752	88.2	1	1	1	1	88	0	1	0	0	0	0	0									35813	935.3	1	1	1	1
47080	88.3	1	1	1	1	88	0	1	0	0	0	0	0									38752	935.4	1	1	1	1
35813	88.4	1	1	1	1	88	0	1	0	0	0	0	0									47080	935.5	1	1	1	1
36424	89.1	1	1	1	1	89	0	1	0	0	0	0	0	0	1	0	0	0	0	0		36424	1168.1	1	1	1	1	1168	0	1	0	0	0	0	0	0	1	0	0	0	0	0		TN	TP	TN	TN	TN	TN
43767	89.2	1	1	1	1	89	0	1	0	0	0	0	0									40605	1168.2	1	0	1	1
42717	89.3	1	1	1	1	89	0	1	0	0	0	0	0									42717	1168.3	1	1	1	1
40605	89.4	1	1	1	1	89	0	1	0	0	0	0	0									43767	1168.4	1	1	1	1
3355079	90.1a	1	1	1	1	90	0	0	1	0	0	0	0	0	0	1	0	0	0	0		3355079	775.1	1	1	1	1	775	0	0	1	0	0	0	0	0	0	1	0	0	0	0		TN	TN	TP	TN	TN	TN
41682	90.1b	1	0	0	0	90	0	0	1	0	0	0	0									39691	775.2	1	1	1	1
44054	90.2	1	1	1	1	90	0	1	0	0	0	0	0									41682	775.3	1	0	0	0
39691	90.3	1	1	1	1	90	0	1	0	0	0	0	0									44054	775.4	1	1	1	1
2768852	91.1a	1	1	1	1	91	0	0	1	0	0	0	0	0	0	1	0	0	0	0		2768852	113.1	1	1	1	1	113	0	0	1	0	0	0	0	0	0	1	0	0	0	0		TN	TN	TP	TN	TN	TN
41362	91.1b	1	0	0	0	91	0	0	1	0	0	0	0									31170	113.2	1	1	1	1
41361	91.1c	1	0	0	0	91	0	0	1	0	0	0	0									37152	113.3	1	1	1	1
31170	91.2	1	1	1	1	91	0	1	0	0	0	0	0									41361	113.4	1	0	0	0
37152	91.3	1	1	1	1	91	0	1	0	0	0	0	0									41362	113.5	1	0	0	0
43819	92.1a	1	1	1	1	92	0	0	1	0	0	0	0	0	0	1	0	0	0	0		39095	1464.1	1	0	0	0	1464	0	0	1	0	0	0	0	0	0	1	0	0	0	0		TN	TN	TP	TN	TN	TN
39095	92.1b	1	0	0	0	92	0	0	1	0	0	0	0									43819	1464.2	1	1	1	1
43832	93.1	1	1	1	1	93	0	1	0	0	0	0	0	0	1	0	0	0	0	0		43766	1818.1	1	1	1	1	1818	0	1	0	0	0	0	0	0	1	0	0	0	0	0		TN	TP	TN	TN	TN	TN
43766	93.2	1	1	1	1	93	0	1	0	0	0	0	0									43832	1818.2	1	1	1	1
40827	94.1a	1	1	2	1	94	0	0	1	0	1	0	0	0	0	1	0	0	0	0		38884	1614.1	1	1	1	1	1614	0	0	1	0	0	0	0	0	0	1	0	0	0	0		TN	TN	TP	TN	TN	TN
40828	94.1b	1	0	0	0	94	0	0	1	0	0	0	0									40830	1614.2	1	0	0	0
40830	94.1c	1	0	0	0	94	0	0	1	0	0	0	0
43010	95.1a	1	1	2	1	95	0	0	1	0	1	0	0	0	0	1	0	1	0	0		43010	1768.1	1	1	2	1	1768	0	0	0	0	0	0	1	0	0	0	0	0	0	1		TN	TN	FN	TN	FN	TN
43011	95.1b	1	0	0	0	95	0	0	1	0	0	0	0									43011	1768.2	1	0	0	0
43383	95.2	1	1	1	1	95	0	1	0	0	0	0	0									43383	1768.3	1	1	1	1
40975	96.1	1	2	1	1	96	0	0	0	1	0	0	0	0	0	0	1	0	0	0		2768661	1234.1	1	1	1	1	1234	0	0	0	0	0	0	1	0	0	0	0	0	0	1		TN	TN	TN	FN	TN	TN
36813	96.2	1	1	1	1	96	0	1	0	0	0	0	0									43190	1234.1	1	1	2	0
35110	96.3	1	1	1	1	96	0	1	0	0	0	0	0									34379	1234.2	1	1	1	1
																						35110	1234.3	1	1	1	1
																						36813	1234.4	1	1	1	1
																						37027	1234.5	1	1	1	1
																						37655	1234.6	1	1	1	1
																						40975	1234.7	1	2	1	1
																						41411	1234.8	1	1	1	1
																						41961	1234.9	1	1	1	1
45328	97.1	1	1	1	1	97	0	1	0	0	0	0	0	0	1	0	0	0	0	0		33957	846.1	1	1	1	1	846	0	1	0	0	0	0	0	0	1	0	0	0	0	0		TN	TP	TN	TN	TN	TN
33957	97.2	1	1	1	1	97	0	1	0	0	0	0	0									45328	846.2	1	1	1	1
33995	98.1a	1	1	1	1	98	0	0	1	0	0	0	0	0	0	0	0	1	0	0		32876	3379	1	1	2	1	3379	0	0	0	0	1	0	0	0	0	0	0	1	0	0		TN	TN	TN	TN	TP	TN
33994	98.1b	1	0	0	0	98	0	0	1	0	0	0	0	0	0	1	0	0	0	0		33995	3955	1	1	1	1	3955	1	0	0	0	0	0	0	1	0	0	0	0	0	0		FP	TN	FN	TN	TN	TN
32876	98.2	1	1	2	1	98	0	0	0	0	1	0	0
31027	99.1a	1	1	1	1	99	0	0	1	0	0	0	0	0	0	1	0	0	0	0		31027	2156	1	1	1	1	2156	1	0	0	0	0	0	0	1	0	0	0	0	0	0		FP	TN	FN	TN	TN	TN
41941	99.1b	1	0	0	0	99	0	0	1	0	0	0	0
41446	100.1	1	3	1	1	100	0	0	0	1	0	0	0	0	0	0	1	0	0	0		34504	917.1	1	1	1	1	917	0	1	0	0	0	0	0	0	1	0	0	0	0	0		TN	FP	TN	FN	TN	TN
34504	100.2	1	1	1	1	100	0	1	0	0	0	0	0									41446	917.2	1	1	1	1
34077	101.1	1	1	1	1	101	0	1	0	0	0	0	0	0	1	0	0	0	0	0		34077	867.1	1	1	1	1	867	0	1	0	0	0	0	0	0	1	0	0	0	0	0		TN	TP	TN	TN	TN	TN
34572	101.2	1	1	1	1	101	0	1	0	0	0	0	0									34572	867.2	1	1	1	1
47900	102.1a	1	1	1	1	102	0	0	1	0	0	0	0	0	0	1	0	0	0	0		31680	1834.1	1	1	1	1	1834	0	0	1	0	0	0	0	0	0	1	0	0	0	0		TN	TN	TP	TN	TN	TN
45432	102.1b	1	0	0	0	102	0	0	1	0	0	0	0									36655	1834.2	1	1	1	1
42750	102.2	1	1	1	0	102	0	1	0	0	0	0	0									36791	1834.3	1	1	1	1
																						39502	1834.4	1	1	1	1
																						45432	1834.5	1	0	0	0
																						47900	1834.6	1	1	1	1
40134	103.1a	1	1	2	1	103	0	0	1	0	1	0	0	0	0	1	0	1	0	0		40134	1551.1	1	1	2	1	1551	0	0	0	0	0	0	1	0	0	0	0	0	0	1		TN	TN	FN	TN	FN	TN
40667	103.1b	1	0	0	0	103	0	0	1	0	0	0	0									40667	1551.2	1	0	0	0
43162	104.1	1	1	1	1	104	0	1	0	0	0	0	0	0	1	0	0	0	0	0		43162	8207	1	3	2	3	8207	0	0	0	0	0	0	1	0	0	0	0	0	0	1		TN	FN	TN	TN	TN	TN
35037	105.1	1	1	1	2	105	0	0	0	0	0	1	0	0	0	0	0	0	1	0		35031	990.1	1	0	0	0	990	0	0	0	0	0	0	1	0	0	0	0	0	0	1		TN	TN	TN	TN	TN	FN
35035	105.2	1	1	0	0	105	0	1	0	0	0	0	0									35035	990.2	1	0	0	0
35031	105.3	1	1	0	0	105	0	1	0	0	0	0	0									35037	990.3	1	3	1	2
																						42778	990.4	1	2	0	1
33642	106.1	1	1	1	1	106	0	1	0	0	0	0	0	0	0	1	0	0	0	0		33642	799.1	1	2	1	1	799	0	0	0	0	0	0	1	0	0	0	0	0	0	1		TN	TN	FN	TN	TN	TN
34016	106.2a	1	1	0	0	106	0	0	1	0	0	0	0									34016	799.2	1	0	0	0
34017	106.2b	1	0	0	0	106	0	0	1	0	0	0	0									34017	799.3	1	0	0	0
38065	107.1	1	1	1	1	107	0	1	0	0	0	0	0	0	0	0	1	0	0	0		38065	1371.1	1	1	1	1	1371	0	0	0	1	0	0	0	0	0	0	1	0	0	0		TN	TN	TN	TP	TN	TN
41612	107.2	1	2	1	1	107	0	0	0	1	0	0	0									41612	1371.2	1	2	1	1
43580	107.3	1	1	1	1	107	0	1	0	0	0	0	0									43580	1371.3	1	1	1	1
34884	108.1	1	1	1	1	108	0	1	0	0	0	0	0	0	1	0	0	0	0	0		34884	967.1	1	1	1	1	967	0	1	0	0	0	0	0	0	1	0	0	0	0	0		TN	TP	TN	TN	TN	TN
45826	108.2	1	1	1	1	108	0	1	0	0	0	0	0									45826	967.2	1	1	1	1
32974	109.1a	1	1	1	1	109	0	0	1	0	0	0	0	0	0	1	0	0	0	0		32974	670.1	1	1	1	1	670	0	0	1	0	0	0	0	0	0	1	0	0	0	0		TN	TN	TP	TN	TN	TN
40445	109.1b	1	0	0	0	109	0	0	1	0	0	0	0									40445	670.2	1	0	0	0
38169	110.1a	1	1	1	1	110	0	0	1	0	0	0	0	0	0	1	0	1	0	0		32109	468.1	1	1	2	1	468	0	0	1	0	0	0	0	0	0	1	0	0	0	0		TN	TN	TP	TN	FN	TN
38168	110.1b	1	0	0	0	110	0	0	1	0	0	0	0									34640	468.2	1	1	0	0
44856	110.1c	1	0	0	0	110	0	0	1	0	0	0	0									38168	468.3	1	0	0	0
32109	110.2	1	1	2	1	110	0	0	0	0	1	0	0									38169	468.4	1	1	1	1
34640	110.3	1	1	1	1	110	0	1	0	0	0	0	0									44856	468.5	1	0	0	0
45827	111.1a	1	1	1	1	111	0	0	1	0	0	0	0	0	0	1	0	0	0	0		33232	704.1	1	0	1	0	704	0	0	1	0	0	0	0	0	0	1	0	0	0	0		TN	TN	TP	TN	TN	TN
33232	111.1b	1	0	0	0	111	0	0	1	0	0	0	0									45827	704.2	1	1	0	1
36329	112.1	1	1	1	1	112	0	1	0	0	0	0	0	0	1	0	0	0	0	0		246577	1084.1	1	0	0	0	1084	0	0	0	0	0	0	1	0	0	0	0	0	0	1		TN	FN	TN	TN	TN	TN
44913	112.2	1	1	1	1	112	0	1	0	0	0	0	0									42465	1084.1	1	1	1	1
																						44913	1084.11	1	0	0	0
																						47878	1084.12	1	1	1	0
																						31474	1084.2	1	1	1	1
																						319047	1084.3	1	0	0	0
																						33411	1084.4	1	0	0	0
																						33603	1084.5	1	0	0	0
																						35751	1084.6	1	0	0	0
																						36329	1084.7	1	3	2	2
																						37613	1084.8	1	0	0	0
																						38092	1084.9	1	0	0	0
34411	113.1	1	1	1	1	113	0	1	0	0	0	0	0	0	1	0	0	0	0	0		31441	906.1	1	1	1	1	906	0	1	0	0	0	0	0	0	1	0	0	0	0	0		TN	TP	TN	TN	TN	TN
42453	113.2	1	1	0	1	113	0	1	0	0	0	0	0									34411	906.2	1	1	1	2
																						36727	906.3	1	1	1	1
																						38433	906.4	1	1	1	1
																						42453	906.5	1	1	0	0
																						48448	906.6	1	1	2	1
31469	114.1a	1	1	1	1	114	0	0	1	0	0	0	0	0	0	1	0	0	0	0		31469	250.1	1	0	1	1	250	0	0	1	0	0	0	0	0	0	1	0	0	0	0		TN	TN	TP	TN	TN	TN
31470	114.1b	1	0	0	0	114	0	0	1	0	0	0	0									31470	250.2	1	0	0	0
44272	115.1a	1	1	1	1	115	0	0	1	0	0	0	0	0	0	1	0	0	0	0		35430	1046.1	1	0	0	0	1046	0	0	1	0	0	0	0	0	0	1	0	0	0	0		TN	TN	TP	TN	TN	TN
35430	115.1b	1	0	0	0	115	0	0	1	0	0	0	0									44272	1046.2	1	1	1	1
41737	116.1	1	1	1	1	116	0	1	0	0	0	0	0	0	1	0	0	0	0	0		30971	176.1	1	1	1	1	176	0	0	0	0	0	0	1	0	0	0	0	0	0	1		TN	FN	TN	TN	TN	TN
31149	116.2	1	1	1	1	116	0	1	0	0	0	0	0									43351	176.1	1	1	1	1
3354971	116.3	1	1	1	1	116	0	1	0	0	0	0	0									31149	176.2	1	1	1	1
																						32301	176.3	1	1	0	1
																						3354971	176.4	1	1	1	1
																						39203	176.5	1	1	1	1
																						40133	176.6	1	1	1	1
																						41303	176.7	1	0	1	1
																						41737	176.8	1	1	1	1
																						41743	176.9	1	1	1	1
40464	117.1	1	1	1	1	117	0	1	0	0	0	0	0	0	1	0	0	0	0	0		32183	490.1	1	1	1	0	490	0	1	0	0	0	0	0	0	1	0	0	0	0	0		TN	TP	TN	TN	TN	TN
32183	117.2	1	1	1	1	117	0	1	0	0	0	0	0									40464	490.2	1	1	1	2
44522	118.1	1	1	0	0	118	0	1	0	0	0	0	0	0	0	0	1	0	0	0		33314	718.1	1	1	1	0	718	0	0	0	0	0	0	1	0	0	0	0	0	0	1		TN	TN	TN	FN	TN	TN
33314	118.2	1	1	1	0	118	0	1	0	0	0	0	0									37603	718.2	1	2	1	1
37603	118.3	1	3	1	1	118	0	0	0	1	0	0	0									44522	718.3	1	0	0	0
38515	119.1	1	1	2	2	119	0	0	0	0	1	1	0	0	0	0	0	1	1	0		38515	1403.1	1	1	2	2	1403	0	0	0	0	0	0	1	0	0	0	0	0	0	1		TN	TN	TN	TN	FN	FN
44870	119.2	1	1	1	2	119	0	0	0	0	0	1	0									44870	1403.2	1	1	1	2
31883	120.1	1	1	1	1	120	0	1	0	0	0	0	0	0	1	0	0	0	0	0		31883	410.1	1	1	1	1	410	0	1	0	0	0	0	0	0	1	0	0	0	0	0		TN	TP	TN	TN	TN	TN
4379817	120.2	1	1	1	1	120	0	1	0	0	0	0	0									33051	410.2	1	0	1	1
33051	120.3	1	0	1	1	120	0	1	0	0	0	0	0									33059	410.3	1	1	1	1
33059	120.4	1	1	1	1	120	0	1	0	0	0	0	0									4379817	410.4	1	1	1	1
40285	121.1a	1	1	1	2	121	0	0	1	0	0	1	0	0	0	1	0	0	1	0		40285	1565.1	1	1	1	2	1565	0	0	0	0	0	0	1	0	0	0	0	0	0	1		TN	TN	FN	TN	TN	FN
40287	121.1b	1	0	0	0	121	0	0	1	0	0	0	0									40287	1565.2	1	0	0	0
40428	121.2	1	1	1	1	121	0	1	0	0	0	0	0									40428	1565.3	1	0	1	1
47137	122.1	1	1	1	1	122	0	1	0	0	0	0	0	0	1	0	0	0	0	0		3772559	1330.1	1	1	1	1	1330	0	1	0	0	0	0	0	0	1	0	0	0	0	0		TN	TP	TN	TN	TN	TN
42820	122.2	1	1	1	1	122	0	1	0	0	0	0	0									42820	1330.2	1	1	1	1
3772559	122.3	1	1	1	1	122	0	1	0	0	0	0	0									47137	1330.3	1	1	1	1
31240	123.1	1	1	1	1	123	0	1	0	0	0	0	0	0	1	0	0	0	0	0		31240	195.1	1	2	1	1	195	0	0	0	1	0	0	0	0	0	0	1	0	0	0		TN	FN	TN	FP	TN	TN
34422	123.2	1	1	1	1	123	0	1	0	0	0	0	0									34422	195.2	1	1	1	1
40517	124.1	1	1	2	1	124	0	0	0	0	1	0	0	0	1	0	0	0	0	0		31201	2241	1	1	1	1	2241	1	0	0	0	0	0	0	1	0	0	0	0	0	0		FP	FN	TN	TN	TN	TN
49713	124.2	1	1	1	1	124	0	1	0	0	0	0	0	0	0	0	0	1	0	0		40517	7040	1	1	2	1	7040	0	0	0	0	1	0	0	0	0	0	0	1	0	0		TN	TN	TN	TN	TP	TN
31201	124.3	1	1	1	1	124	0	1	0	0	0	0	0	0	1	0	0	0	0	0		49713	8733	1	1	1	1	8733	1	0	0	0	0	0	0	1	0	0	0	0	0	0		FP	FN	TN	TN	TN	TN
38005	125.1	1	1	1	1	125	0	1	0	0	0	0	0	0	1	0	0	0	0	0		34629	930.1	1	0	1	1	930	0	1	0	0	0	0	0	0	1	0	0	0	0	0		TN	TP	TN	TN	TN	TN
38004	125.2	1	1	1	1	125	0	1	0	0	0	0	0									38004	930.2	1	2	1	2
34629	125.3	1	0	1	1	125	0	1	0	0	0	0	0									38005	930.3	1	0	1	0
45307	126.1	1	1	1	1	126	0	1	0	0	0	0	0	0	1	0	0	0	0	0		40090	1545.1	1	1	1	1	1545	0	1	0	0	0	0	0	0	1	0	0	0	0	0		TN	TP	TN	TN	TN	TN
40090	126.2	1	1	1	1	126	0	1	0	0	0	0	0									45307	1545.2	1	1	1	1
31023	126.3	1	1	0	0	126	0	1	0	0	0	0	0	0	1	0	0	0	0	0		31659	2456	1	1	1	0	2456	1	0	0	0	0	0	0	1	0	0	0	0	0	0		FP	FN	TN	TN	TN	TN
31659	126.4	1	1	1	0	126	0	1	0	0	0	0	0
45374	127.1	1	1	1	1	127	0	1	0	0	0	0	0	0	1	0	0	0	0	0		31247	199.1	1	1	1	1	199	0	1	0	0	0	0	0	0	1	0	0	0	0	0		TN	TP	TN	TN	TN	TN
31247	127.2	1	1	1	1	127	0	1	0	0	0	0	0									37733	199.2	1	1	1	1
																						45374	199.3	1	1	1	1
43749	128.1	1	1	1	1	128	0	1	0	0	0	0	0	0	1	0	0	0	0	0		42935	1765.1	1	1	1	1	1765	0	1	0	0	0	0	0	0	1	0	0	0	0	0		TN	TP	TN	TN	TN	TN
42935	128.2	1	1	1	1	128	0	1	0	0	0	0	0									43749	1765.2	1	1	1	1
36643	129.1	1	1	1	1	129	0	1	0	0	0	0	0	0	1	0	0	0	0	0		36643	5092	1	1	1	1	5092	1	0	0	0	0	0	0	1	0	0	0	0	0	0		FP	FN	TN	TN	TN	TN
37201	129.2	1	1	1	1	129	0	1	0	0	0	0	0	0	1	0	0	0	0	0		37201	5341	1	1	1	1	5341	1	0	0	0	0	0	0	1	0	0	0	0	0	0		FP	FN	TN	TN	TN	TN
38424	129.3	1	1	1	1	129	0	1	0	0	0	0	0	0	1	0	0	0	0	0		38424	5983	1	1	1	1	5983	1	0	0	0	0	0	0	1	0	0	0	0	0	0		FP	FN	TN	TN	TN	TN
35047	130.1	1	1	2	2	130	0	1	0	0	0	0	0	0	1	0	0	0	0	0		35045	992.1	1	0	0	0	992	0	1	0	0	0	0	0	0	1	0	0	0	0	0		TN	TP	TN	TN	TN	TN
35045	130.2	1	0	0	0	130	0	1	0	0	0	0	0									35047	992.2	1	1	2	2
41087	130.3	1	1	1	1	130	0	1	0	0	0	0	0									41087	992.3	1	1	1	1
44540	131.1	1	1	1	1	131	0	1	0	0	0	0	0	0	1	0	0	0	0	0		44540	8582	1	1	1	1	8582	1	0	0	0	0	0	0	1	0	0	0	0	0	0		FP	FN	TN	TN	TN	TN
45816	131.2	1	1	1	1	131	0	1	0	0	0	0	0	0	1	0	0	0	0	0		45816	8639	1	1	1	1	8639	1	0	0	0	0	0	0	1	0	0	0	0	0	0		FP	FN	TN	TN	TN	TN
39013	132.1	1	1	1	1	132	0	1	0	0	0	0	0	0	1	0	0	0	0	0		39013	6284	1	1	1	1	6284	1	0	0	0	0	0	0	1	0	0	0	0	0	0		FP	FN	TN	TN	TN	TN
39596	132.2	1	1	1	1	132	0	1	0	0	0	0	0	0	1	0	0	0	0	0		39596	6568	1	1	1	2	6568	0	0	0	0	0	1	0	0	0	0	0	0	1	0		TN	FN	TN	TN	TN	FP
43023	133.1a	1	1	1	1	133	0	0	1	0	0	0	0
43020	133.1b	1	0	0	0	133	0	0	1	0	0	0	0
246593	133.1c	1	0	0	0	133	0	0	1	0	0	0	0
44279	134.1	1	1	1	1	134	0	1	0	0	0	0	0	0	1	0	0	0	0	0		32552	560.1	1	1	1	0	560	0	1	0	0	0	0	0	0	1	0	0	0	0	0		TN	TP	TN	TN	TN	TN
32552	134.2	1	1	1	0	134	0	1	0	0	0	0	0									44279	560.2	1	1	1	1
8674055	134.3	1	1	1	1	134	0	1	0	0	0	0	0	0	1	0	0	0	0	0		8674055	9216	1	1	1	1	9216	1	0	0	0	0	0	0	1	0	0	0	0	0	0		FP	FN	TN	TN	TN	TN
37467	135.1a	1	1	1	1	135	0	0	1	0	0	0	0	0	0	1	0	0	0	0		37467	1280.1	1	1	1	1	1280	0	0	1	0	0	0	0	0	0	1	0	0	0	0		TN	TN	TP	TN	TN	TN
37685	135.1b	1	0	0	0	135	0	0	1	0	0	0	0									37685	1280.2	1	0	0	0
43490	135.2	1	1	1	1	135	0	1	0	0	0	0	0									43490	1280.3	1	1	1	1
34361	136.1	1	1	1	1	136	0	1	0	0	0	0	0	0	1	0	0	0	0	0		32846	898.1	1	2	2	2	898	0	0	0	0	0	0	1	0	0	0	0	0	0	1		TN	FN	TN	TN	TN	TN
32846	136.2	1	1	1	1	136	0	1	0	0	0	0	0									34361	898.2	1	0	1	1
35170	137.1	1	1	1	1	137	0	1	0	0	0	0	0	0	1	0	0	0	0	0		35170	1013.1	1	1	1	1	1013	0	1	0	0	0	0	0	0	1	0	0	0	0	0		TN	TP	TN	TN	TN	TN
39750	137.2	1	1	1	1	137	0	1	0	0	0	0	0									39750	1013.2	1	1	1	1
34903	138.1a	1	1	1	1	138	0	0	1	0	0	0	0	0	0	1	0	0	0	0		34903	972.1	1	1	0	0	972	0	0	1	0	0	0	0	0	0	1	0	0	0	0		TN	TN	TP	TN	TN	TN
34906	138.1b	1	0	0	0	138	0	0	1	0	0	0	0									34906	972.2	1	0	1	1
34908	138.1c	1	0	0	0	138	0	0	1	0	0	0	0									34908	972.3	1	0	0	0
30981	139.1a	1	1	1	1	139	0	0	1	0	0	0	0	0	0	1	0	0	0	0		30981	143.1	1	0	0	0	143	0	0	1	0	0	0	0	0	0	1	0	0	0	0		TN	TN	TP	TN	TN	TN
30982	139.1b	1	0	0	0	139	0	0	1	0	0	0	0									30982	143.2	1	1	0	0
30983	139.1c	1	0	0	0	139	0	0	1	0	0	0	0									30983	143.3	1	0	1	1
30985	139.2	1	1	1	1	139	0	1	0	0	0	0	0									30985	143.4	1	1	1	0
36468	140.1	1	1	1	1	140	0	1	0	0	0	0	0	0	1	0	0	0	0	0		36468	1174.1	1	1	2	2	1174	0	0	0	0	0	0	1	0	0	0	0	0	0	1		TN	FN	TN	TN	TN	TN
42400	140.3	1	1	1	1	140	0	1	0	0	0	0	0									38490	1174.2	1	1	1	1
38490	140.4	1	1	1	1	140	0	1	0	0	0	0	0									42400	1174.3	1	1	1	1
46156	141.1	1	1	1	1	141	0	1	0	0	0	0	0	0	1	0	0	0	0	0		35678	1602.1	1	1	2	1	1602	0	0	0	0	1	0	0	0	0	0	0	1	0	0		TN	FN	TN	TN	FP	TN
40693	141.2	1	1	1	1	141	0	1	0	0	0	0	0									40693	1602.2	1	1	1	1
																						46156	1602.3	1	1	1	1
33156	142.1	1	1	1	1	142	0	1	0	0	0	0	0	0	1	0	0	0	0	0		32217	3005	1	1	1	1	3005	1	0	0	0	0	0	0	1	0	0	0	0	0	0		FP	FN	TN	TN	TN	TN
32217	142.2	1	1	1	1	142	0	1	0	0	0	0	0	0	1	0	0	0	0	0		33156	3500	1	1	1	1	3500	1	0	0	0	0	0	0	1	0	0	0	0	0	0		FP	FN	TN	TN	TN	TN
44849	143.1	1	1	1	1	143	0	1	0	0	0	0	0	0	1	0	0	0	0	0		34395	903.1	1	0	1	1	903	0	0	1	0	0	0	0	0	0	1	0	0	0	0		TN	FN	FP	TN	TN	TN
40962	143.2	1	1	1	1	143	0	1	0	0	0	0	0									40962	903.2	1	1	1	1
41944	143.3	1	2	1	1	143	0	1	0	0	0	0	0									41944	903.3	1	0	1	1
34395	143.4	1	1	1	1	143	0	1	0	0	0	0	0									41945	903.4	1	0	0	0
41945	143.5	1	1	1	1	143	0	1	0	0	0	0	0									44849	903.5	1	1	1	1
31248	144.1a	1	1	1	1	144	0	0	1	0	0	0	0	0	0	1	0	0	0	0		31248	200.1	1	1	1	1	200	0	0	1	0	0	0	0	0	0	1	0	0	0	0		TN	TN	TP	TN	TN	TN
318552	144.1b	1	0	0	0	144	0	0	1	0	0	0	0									318552	200.2	1	0	0	0
																						34705	200.3	1	0	0	0
33608	145.1a	1	1	2	1	145	0	0	1	0	1	0	0	0	0	1	0	1	0	0		317817	313.1	1	1	0	0	313	0	0	1	0	0	0	0	0	0	1	0	0	0	0		TN	TN	TP	TN	FN	TN
33607	145.1b	1	0	0	0	145	0	0	1	0	0	0	0									33010	313.2	1	0	0	0
																						33607	313.3	1	0	0	0
																						33608	313.4	1	1	2	1
																						37631	313.5	1	1	1	1
35662	146.1	1	1	1	1	146	0	1	0	0	0	0	0	0	0	0	1	0	0	0		35662	1076.1	1	1	1	1	1076	0	1	0	0	0	0	0	0	1	0	0	0	0	0		TN	FP	TN	FN	TN	TN
44108	146.2	1	1	1	1	146	0	1	0	0	0	0	0									40297	1076.2	1	1	1	1
40297	146.3	1	2	1	1	146	0	0	0	1	0	0	0	0	1	0	0	0	0	0		44108	8547	1	1	1	1	8547	1	0	0	0	0	0	0	1	0	0	0	0	0	0		FP	FN	TN	TN	TN	TN
41491	147.1	1	1	1	1	147	0	1	0	0	0	0	0	0	1	0	0	0	0	0		31165	1833.1	1	1	1	1	1833	0	0	0	0	0	0	1	0	0	0	0	0	0	1		TN	FN	TN	TN	TN	TN
44544	147.2	1	1	1	1	147	0	1	0	0	0	0	0									33823	1833.2	1	1	1	0
43656	147.3	1	1	1	1	147	0	1	0	0	0	0	0									36702	1833.3	1	1	1	1
33823	147.4	1	1	1	1	147	0	1	0	0	0	0	0									41491	1833.4	1	1	1	1
36702	147.5	1	1	1	1	147	0	1	0	0	0	0	0									43656	1833.5	1	2	1	3
31165	147.6	1	1	1	1	147	0	1	0	0	0	0	0									44544	1833.6	1	1	1	1
37272	148.1a	1	1	1	1	148	0	0	1	0	0	0	0	0	0	1	0	0	0	0		34823	999.1	1	1	0	0	999	0	0	0	0	0	0	1	0	0	0	0	0	0	1		TN	TN	FN	TN	TN	TN
37277	148.1b	1	0	0	0	148	0	0	1	0	0	0	0									35077	999.2	1	1	2	0
39663	148.2	1	1	1	1	148	0	1	0	0	0	0	0									37272	999.3	1	1	1	1
44497	148.3	1	1	1	1	148	0	1	0	0	0	0	0									37277	999.4	1	0	0	0
																						39663	999.5	1	1	1	1
																						41616	999.6	1	0	1	1
																						44497	999.7	1	1	1	1
33581	149.1	1	1	1	1	149	0	1	0	0	0	0	0	0	1	0	0	0	0	0		31070	1370.1	1	0	0	0	1370	0	0	1	0	0	0	0	0	0	1	0	0	0	0		TN	FN	FP	TN	TN	TN
33602	149.2	1	1	1	1	149	0	1	0	0	0	0	0									33581	1370.2	1	1	1	1
33583	149.3	1	1	1	1	149	0	1	0	0	0	0	0									33583	1370.3	1	1	0	0
																						33602	1370.4	1	1	2	1
																						38063	1370.5	1	1	1	0
																						42736	1370.6	1	0	0	0
																						49638	1370.7	1	1	1	1
34847	150.1	1	1	1	1	150	0	1	0	0	0	0	0	0	1	0	0	0	0	0		34844	963.1	1	0	1	1	963	0	1	0	0	0	0	0	0	1	0	0	0	0	0		TN	TP	TN	TN	TN	TN
34844	150.2	1	1	1	1	150	0	1	0	0	0	0	0									34847	963.2	1	1	1	1
38995	151.1	1	1	1	1	151	0	1	0	0	0	0	0	0	1	0	0	0	0	0		35168	1012.1	1	1	1	1	1012	0	1	0	0	0	0	0	0	1	0	0	0	0	0		TN	TP	TN	TN	TN	TN
35800	151.2	1	1	1	1	151	0	1	0	0	0	0	0									35800	1012.2	1	0	1	1
35168	151.3	1	1	1	1	151	0	1	0	0	0	0	0									38995	1012.3	1	1	1	1
35197	152.1	1	1	1	1	152	0	1	0	0	0	0	0	0	1	0	0	0	0	0		35197	1014.1	1	1	1	1	1014	0	1	0	0	0	0	0	0	1	0	0	0	0	0		TN	TP	TN	TN	TN	TN
45775	152.2	1	1	1	1	152	0	1	0	0	0	0	0									37190	1014.2	1	1	1	1
																						44653	1014.3	1	1	1	1
																						45775	1014.4	1	1	1	1
38146	153.1a	1	1	1	1	153	0	0	1	0	0	0	0	0	0	1	0	1	0	0		32981	671.1	1	1	1	1	671	0	0	1	0	0	0	0	0	0	1	0	0	0	0		TN	TN	TP	TN	FN	TN
38831	153.1b	1	0	0	0	153	0	0	1	0	0	0	0									36775	671.2	1	1	2	1
32981	153.2	1	1	1	1	153	0	1	0	0	0	0	0									38146	671.3	1	1	1	1
43319	153.3	1	1	1	1	153	0	1	0	0	0	0	0									38831	671.4	1	0	0	0
36775	153.4	1	1	3	1	153	0	0	0	0	1	0	0									40249	671.5	1	1	1	1
41136	153.5	1	1	1	1	153	0	1	0	0	0	0	0									41136	671.6	1	1	0	0
31945	153.7	1	1	1	1	153	0	1	0	0	0	0	0									43319	671.7	1	1	1	1
40249	153.8	1	1	1	1	153	0	1	0	0	0	0	0
38218	154	1	1	1	1	154	1	0	0	0	0	0	0	1	0	0	0	0	0	0		318930	428.1	1	0	0	0	428	0	1	0	0	0	0	0	0	1	0	0	0	0	0		FN	FP	TN	TN	TN	TN
																						38218	428.2	1	1	2	2
45931	155	1	1	1	1	155	1	0	0	0	0	0	0	1	0	0	0	0	0	0		45931	8648	1	1	1	1	8648	1	0	0	0	0	0	0	1	0	0	0	0	0	0		TP	TN	TN	TN	TN	TN
37345	156	1	2	1	1	156	0	0	0	1	0	0	0	0	0	0	1	0	0	0		37345	5407	1	2	1	1	5407	0	0	0	1	0	0	0	0	0	0	1	0	0	0		TN	TN	TN	TP	TN	TN
36521	157	1	2	1	1	157	0	0	0	1	0	0	0	0	0	0	1	0	0	0		36521	5030	1	2	1	1	5030	0	0	0	1	0	0	0	0	0	0	1	0	0	0		TN	TN	TN	TP	TN	TN
39943	158	1	1	1	1	158	1	0	0	0	0	0	0	1	0	0	0	0	0	0		39943	6755	1	1	1	1	6755	1	0	0	0	0	0	0	1	0	0	0	0	0	0		TP	TN	TN	TN	TN	TN
35097	159	1	3	1	1	159	0	0	0	1	0	0	0	0	0	0	1	0	0	0		35097	4417	1	4	1	1	4417	0	0	0	1	0	0	0	0	0	0	1	0	0	0		TN	TN	TN	TP	TN	TN
32721	160	1	1	1	1	160	1	0	0	0	0	0	0	1	0	0	0	0	0	0		32721	3305	1	1	1	1	3305	1	0	0	0	0	0	0	1	0	0	0	0	0	0		TP	TN	TN	TN	TN	TN
36209	161	1	1	1	7	161	0	0	0	0	0	1	0	0	0	0	0	0	1	0		36209	4896	1	1	1	7	4896	0	0	0	0	0	1	0	0	0	0	0	0	1	0		TN	TN	TN	TN	TN	TP
34993	162	1	1	1	1	162	1	0	0	0	0	0	0	1	0	0	0	0	0	0		34993	9459	1	1	1	1	9459	1	0	0	0	0	0	0	1	0	0	0	0	0	0		TP	TN	TN	TN	TN	TN
36057	163	1	1	1	1	163	1	0	0	0	0	0	0	1	0	0	0	0	0	0		36057	4826	1	1	1	1	4826	1	0	0	0	0	0	0	1	0	0	0	0	0	0		TP	TN	TN	TN	TN	TN
39833	164	1	0	1	1	164	1	0	0	0	0	0	0	1	0	0	0	0	0	0		39833	6690	1	0	1	1	6690	1	0	0	0	0	0	0	1	0	0	0	0	0	0		TP	TN	TN	TN	TN	TN
31151	165	1	1	2	1	165	0	0	0	0	1	0	0	0	0	0	0	1	0	0		31151	2216	1	1	2	1	2216	0	0	0	0	1	0	0	0	0	0	0	1	0	0		TN	TN	TN	TN	TP	TN
44548	166	1	1	1	1	166	1	0	0	0	0	0	0	1	0	0	0	0	0	0		44548	9954	1	1	1	1	9954	1	0	0	0	0	0	0	1	0	0	0	0	0	0		TP	TN	TN	TN	TN	TN
33226	167	1	3	1	1	167	0	0	0	1	0	0	0	0	0	0	1	0	0	0		33226	9400	1	3	1	1	9400	0	0	0	1	0	0	0	0	0	0	1	0	0	0		TN	TN	TN	TP	TN	TN
36032	168	1	1	1	1	168	1	0	0	0	0	0	0	1	0	0	0	0	0	0		36032	4809	1	1	1	1	4809	1	0	0	0	0	0	0	1	0	0	0	0	0	0		TP	TN	TN	TN	TN	TN
41952	169	1	1	1	1	169	1	0	0	0	0	0	0	1	0	0	0	0	0	0		41952	7683	1	1	1	1	7683	1	0	0	0	0	0	0	1	0	0	0	0	0	0		TP	TN	TN	TN	TN	TN
33399	170	1	1	1	1	170	1	0	0	0	0	0	0	1	0	0	0	0	0	0		33399	3621	1	1	1	1	3621	1	0	0	0	0	0	0	1	0	0	0	0	0	0		TP	TN	TN	TN	TN	TN
42428	171	1	2	1	1	171	0	0	0	1	0	0	0	0	0	0	1	0	0	0		42428	7884	1	2	1	1	7884	0	0	0	1	0	0	0	0	0	0	1	0	0	0		TN	TN	TN	TP	TN	TN
34881	172	1	1	1	1	172	1	0	0	0	0	0	0	1	0	0	0	0	0	0		34881	4335	1	1	1	1	4335	1	0	0	0	0	0	0	1	0	0	0	0	0	0		TP	TN	TN	TN	TN	TN
40934	173	1	1	2	1	173	0	0	0	0	1	0	0	0	0	0	0	1	0	0		40934	7238	1	1	2	1	7238	0	0	0	0	1	0	0	0	0	0	0	1	0	0		TN	TN	TN	TN	TP	TN
36619	174	1	1	1	1	174	1	0	0	0	0	0	0	1	0	0	0	0	0	0		36619	5077	1	1	1	1	5077	1	0	0	0	0	0	0	1	0	0	0	0	0	0		TP	TN	TN	TN	TN	TN
37065	175	1	1	2	1	175	0	0	0	0	1	0	0	0	0	0	0	1	0	0		37065	5283	1	1	2	1	5283	0	0	0	0	1	0	0	0	0	0	0	1	0	0		TN	TN	TN	TN	TP	TN
34330	176	1	2	1	1	176	0	0	0	1	0	0	0	0	0	0	1	0	0	0		34330	4091	1	2	1	1	4091	0	0	0	1	0	0	0	0	0	0	1	0	0	0		TN	TN	TN	TP	TN	TN
43793	177	1	1	1	1	177	1	0	0	0	0	0	0	1	0	0	0	0	0	0		43793	8458	1	1	1	1	8458	1	0	0	0	0	0	0	1	0	0	0	0	0	0		TP	TN	TN	TN	TN	TN
39558	178	1	1	1	2	178	0	0	0	0	0	1	0	0	0	0	0	0	1	0		39558	6554	1	1	1	1	6554	1	0	0	0	0	0	0	1	0	0	0	0	0	0		FP	TN	TN	TN	TN	FN
34969	179	1	1	1	3	179	0	0	0	0	0	1	0	0	0	0	0	0	1	0		33486	1774.1	1	1	1	1	1774	0	0	0	0	0	0	1	0	0	0	0	0	0	1		TN	TN	TN	TN	TN	FN
																						38055	1774.1	1	1	1	1
																						38863	1774.11	1	2	4	2
																						39368	1774.12	1	1	1	1
																						40046	1774.13	1	1	1	1
																						40539	1774.14	1	1	1	0
																						43095	1774.15	1	1	1	1
																						43298	1774.16	1	1	1	1
																						43387	1774.17	1	1	1	1
																						43770	1774.18	1	0	0	0
																						50070	1774.19	1	1	1	1
																						33732	1774.2	1	0	0	0
																						33768	1774.3	1	1	1	1
																						34634	1774.4	1	1	1	1
																						34874	1774.5	1	1	1	1
																						34969	1774.6	1	1	1	3
																						35795	1774.7	1	1	1	0
																						36668	1774.8	1	0	1	1
																						37433	1774.9	1	1	1	1
34665	180	1	1	2	1	180	0	0	0	0	1	0	0	0	0	0	0	1	0	0		34665	4252	1	1	2	1	4252	0	0	0	0	1	0	0	0	0	0	0	1	0	0		TN	TN	TN	TN	TP	TN
33834	181	1	1	1	1	181	1	0	0	0	0	0	0	1	0	0	0	0	0	0		33834	3868	1	1	1	1	3868	1	0	0	0	0	0	0	1	0	0	0	0	0	0		TP	TN	TN	TN	TN	TN
35341	182	1	1	1	1	182	1	0	0	0	0	0	0	1	0	0	0	0	0	0		35341	9470	1	1	1	1	9470	1	0	0	0	0	0	0	1	0	0	0	0	0	0		TP	TN	TN	TN	TN	TN
38590	183	1	2	1	1	183	0	0	0	1	0	0	0	0	0	0	1	0	0	0		3355160	782.1	1	2	1	2	782	0	0	0	0	0	0	1	0	0	0	0	0	0	1		TN	TN	TN	FN	TN	TN
																						38590	782.2	1	2	1	1
34560	184	1	1	1	1	184	1	0	0	0	0	0	0	1	0	0	0	0	0	0		34560	9445	1	2	1	1	9445	0	0	0	1	0	0	0	0	0	0	1	0	0	0		FN	TN	TN	FP	TN	TN
40398	185	1	1	1	1	185	1	0	0	0	0	0	0	1	0	0	0	0	0	0		40398	6985	1	1	1	1	6985	1	0	0	0	0	0	0	1	0	0	0	0	0	0		TP	TN	TN	TN	TN	TN
34379	186	1	1	1	1	186	1	0	0	0	0	0	0	1	0	0	0	0	0	0		2768661	1234.1	1	1	1	1	1234	0	0	0	0	0	0	1	0	0	0	0	0	0	1		FN	TN	TN	TN	TN	TN
																						43190	1234.1	1	1	2	0
																						34379	1234.2	1	1	1	1
																						35110	1234.3	1	1	1	1
																						36813	1234.4	1	1	1	1
																						37027	1234.5	1	1	1	1
																						37655	1234.6	1	1	1	1
																						40975	1234.7	1	2	1	1
																						41411	1234.8	1	1	1	1
																						41961	1234.9	1	1	1	1
41032	187	1	1	1	1	187	1	0	0	0	0	0	0	1	0	0	0	0	0	0		41032	7284	1	1	1	1	7284	1	0	0	0	0	0	0	1	0	0	0	0	0	0		TP	TN	TN	TN	TN	TN
47894	188	1	1	1	1	188	1	0	0	0	0	0	0	1	0	0	0	0	0	0		47894	9970	1	1	1	1	9970	1	0	0	0	0	0	0	1	0	0	0	0	0	0		TP	TN	TN	TN	TN	TN
43604	189	1	1	1	1	189	1	0	0	0	0	0	0	1	0	0	0	0	0	0		43604	8378	1	1	1	1	8378	1	0	0	0	0	0	0	1	0	0	0	0	0	0		TP	TN	TN	TN	TN	TN
40462	190	1	1	1	1	190	1	0	0	0	0	0	0	1	0	0	0	0	0	0		40462	7017	1	1	1	1	7017	1	0	0	0	0	0	0	1	0	0	0	0	0	0		TP	TN	TN	TN	TN	TN
42737	191	1	1	1	1	191	1	0	0	0	0	0	0	1	0	0	0	0	0	0		42737	8022	1	1	1	1	8022	1	0	0	0	0	0	0	1	0	0	0	0	0	0		TP	TN	TN	TN	TN	TN
40549	192	1	1	1	1	192	1	0	0	0	0	0	0	1	0	0	0	0	0	0		40549	9781	1	1	1	1	9781	1	0	0	0	0	0	0	1	0	0	0	0	0	0		TP	TN	TN	TN	TN	TN
33944	193	1	1	1	1	193	1	0	0	0	0	0	0	1	0	0	0	0	0	0		33944	3932	1	1	1	1	3932	1	0	0	0	0	0	0	1	0	0	0	0	0	0		TP	TN	TN	TN	TN	TN
32080	194	1	1	1	1	194	1	0	0	0	0	0	0	1	0	0	0	0	0	0		32080	9360	1	1	1	1	9360	1	0	0	0	0	0	0	1	0	0	0	0	0	0		TP	TN	TN	TN	TN	TN
47594	195	1	1	1	1	195	1	0	0	0	0	0	0	1	0	0	0	0	0	0		47594	8693	1	0	1	1	8693	1	0	0	0	0	0	0	1	0	0	0	0	0	0		TP	TN	TN	TN	TN	TN
42596	196	1	1	1	1	196	1	0	0	0	0	0	0	1	0	0	0	0	0	0		42596	9888	1	1	1	1	9888	1	0	0	0	0	0	0	1	0	0	0	0	0	0		TP	TN	TN	TN	TN	TN
37230	197	1	1	1	1	197	1	0	0	0	0	0	0	1	0	0	0	0	0	0		37230	5352	1	1	1	1	5352	1	0	0	0	0	0	0	1	0	0	0	0	0	0		TP	TN	TN	TN	TN	TN
32661	198	1	1	1	1	198	1	0	0	0	0	0	0	1	0	0	0	0	0	0		32661	3268	1	1	1	1	3268	1	0	0	0	0	0	0	1	0	0	0	0	0	0		TP	TN	TN	TN	TN	TN
40246	199	1	1	1	1	199	1	0	0	0	0	0	0	1	0	0	0	0	0	0		40246	6903	1	1	1	1	6903	1	0	0	0	0	0	0	1	0	0	0	0	0	0		TP	TN	TN	TN	TN	TN
2768974	200	1	1	1	1	200	1	0	0	0	0	0	0	1	0	0	0	0	0	0		2768974	9289	1	1	1	1	9289	1	0	0	0	0	0	0	1	0	0	0	0	0	0		TP	TN	TN	TN	TN	TN
37355	201	1	1	1	1	201	1	0	0	0	0	0	0	1	0	0	0	0	0	0		37355	5414	1	1	1	1	5414	1	0	0	0	0	0	0	1	0	0	0	0	0	0		TP	TN	TN	TN	TN	TN
45881	202	1	1	1	1	202	1	0	0	0	0	0	0	1	0	0	0	0	0	0		45881	8644	1	1	1	1	8644	1	0	0	0	0	0	0	1	0	0	0	0	0	0		TP	TN	TN	TN	TN	TN
42889	203	1	1	1	1	203	1	0	0	0	0	0	0	1	0	0	0	0	0	0		42889	8091	1	1	1	1	8091	1	0	0	0	0	0	0	1	0	0	0	0	0	0		TP	TN	TN	TN	TN	TN
38427	204	1	1	1	1	204	1	0	0	0	0	0	0	1	0	0	0	0	0	0		38427	5984	1	1	3	1	5984	0	0	0	0	1	0	0	0	0	0	0	1	0	0		FN	TN	TN	TN	FP	TN
3772082	205	1	1	1	1	205	1	0	0	0	0	0	0	1	0	0	0	0	0	0		3772082	5601	1	1	1	1	5601	1	0	0	0	0	0	0	1	0	0	0	0	0	0		TP	TN	TN	TN	TN	TN
37785	206	1	1	1	1	206	1	0	0	0	0	0	0	1	0	0	0	0	0	0		31991	1136.1	1	1	1	1	1136	0	0	0	0	0	0	1	0	0	0	0	0	0	1		FN	TN	TN	TN	TN	TN
																						40879	1136.1	1	2	1	1
																						35132	1136.2	1	0	1	1
																						35135	1136.3	1	1	1	1
																						36170	1136.4	1	1	0	0
																						37785	1136.5	1	1	1	1
																						38072	1136.6	1	1	1	1
																						38468	1136.7	1	0	0	0
																						38469	1136.8	1	2	1	2
																						38713	1136.9	1	1	1	1
36810	207	1	1	1	1	207	1	0	0	0	0	0	0	1	0	0	0	0	0	0		36810	9517	1	1	1	1	9517	1	0	0	0	0	0	0	1	0	0	0	0	0	0		TP	TN	TN	TN	TN	TN
38067	208	1	1	1	1	208	1	0	0	0	0	0	0	1	0	0	0	0	0	0		38067	5815	1	2	1	1	5815	0	0	0	1	0	0	0	0	0	0	1	0	0	0		FN	TN	TN	FP	TN	TN
39228	209	1	1	1	1	209	1	0	0	0	0	0	0	1	0	0	0	0	0	0		39228	9739	1	1	1	1	9739	1	0	0	0	0	0	0	1	0	0	0	0	0	0		TP	TN	TN	TN	TN	TN
38012	210	1	1	1	1	210	1	0	0	0	0	0	0	1	0	0	0	0	0	0		34000	855.1	1	0	0	0	855	0	0	1	0	0	0	0	0	0	1	0	0	0	0		FN	TN	FP	TN	TN	TN
																						38012	855.2	1	1	1	1
40817	211	1	1	1	1	211	1	0	0	0	0	0	0	1	0	0	0	0	0	0		40817	9791	1	1	1	1	9791	1	0	0	0	0	0	0	1	0	0	0	0	0	0		TP	TN	TN	TN	TN	TN
36612	212	1	1	1	1	212	1	0	0	0	0	0	0	1	0	0	0	0	0	0		36612	5075	1	0	1	1	5075	1	0	0	0	0	0	0	1	0	0	0	0	0	0		TP	TN	TN	TN	TN	TN
43791	213	1	1	1	1	213	1	0	0	0	0	0	0	1	0	0	0	0	0	0		43791	8457	1	1	1	1	8457	1	0	0	0	0	0	0	1	0	0	0	0	0	0		TP	TN	TN	TN	TN	TN
33496	214	1	1	1	1	214	1	0	0	0	0	0	0	1	0	0	0	0	0	0		33496	3674	1	1	1	1	3674	1	0	0	0	0	0	0	1	0	0	0	0	0	0		TP	TN	TN	TN	TN	TN
45325	215	1	1	1	1	215	1	0	0	0	0	0	0	1	0	0	0	0	0	0		45325	8619	1	1	1	1	8619	1	0	0	0	0	0	0	1	0	0	0	0	0	0		TP	TN	TN	TN	TN	TN
41673	216	1	2	1	1	216	1	0	0	0	0	0	0	1	0	0	0	0	0	0		41673	9834	1	1	1	1	9834	1	0	0	0	0	0	0	1	0	0	0	0	0	0		TP	TN	TN	TN	TN	TN
38656	217	1	1	1	1	217	1	0	0	0	0	0	0	1	0	0	0	0	0	0		38656	6087	1	1	1	1	6087	1	0	0	0	0	0	0	1	0	0	0	0	0	0		TP	TN	TN	TN	TN	TN
40489	218	1	1	1	2	218	0	0	0	0	0	1	0	0	0	0	0	0	1	0		40489	7027	1	1	1	2	7027	0	0	0	0	0	1	0	0	0	0	0	0	1	0		TN	TN	TN	TN	TN	TP
37402	219	1	1	1	1	219	1	0	0	0	0	0	0	1	0	0	0	0	0	0		37402	5431	1	1	1	1	5431	1	0	0	0	0	0	0	1	0	0	0	0	0	0		TP	TN	TN	TN	TN	TN
36555	220	1	1	1	1	220	1	0	0	0	0	0	0	1	0	0	0	0	0	0		36555	5047	1	0	1	1	5047	1	0	0	0	0	0	0	1	0	0	0	0	0	0		TP	TN	TN	TN	TN	TN
43565	221	1	1	1	1	221	1	0	0	0	0	0	0	1	0	0	0	0	0	0		43565	8359	1	1	1	1	8359	1	0	0	0	0	0	0	1	0	0	0	0	0	0		TP	TN	TN	TN	TN	TN
43804	222	1	1	1	1	222	1	0	0	0	0	0	0	1	0	0	0	0	0	0		33432	1823.1	1	1	1	1	1823	0	0	0	0	0	0	1	0	0	0	0	0	0	1		FN	TN	TN	TN	TN	TN
																						33474	1823.2	1	0	1	1
																						37778	1823.3	1	2	2	1
																						43804	1823.4	1	1	1	1
																						43811	1823.5	1	1	1	1
																						43826	1823.6	1	1	1	1
																						46000	1823.7	1	0	0	0
36945	223	1	1	1	1	223	1	0	0	0	0	0	0	1	0	0	0	0	0	0		36945	5227	1	1	1	1	5227	1	0	0	0	0	0	0	1	0	0	0	0	0	0		TP	TN	TN	TN	TN	TN
32275	224	1	1	1	1	224	1	0	0	0	0	0	0	1	0	0	0	0	0	0		32275	3032	1	1	1	1	3032	1	0	0	0	0	0	0	1	0	0	0	0	0	0		TP	TN	TN	TN	TN	TN
33565	225	1	1	1	1	225	1	0	0	0	0	0	0	1	0	0	0	0	0	0		33565	3757	1	1	1	1	3757	1	0	0	0	0	0	0	1	0	0	0	0	0	0		TP	TN	TN	TN	TN	TN
38779	226	1	1	1	1	226	1	0	0	0	0	0	0	1	0	0	0	0	0	0		38779	6126	1	1	1	1	6126	1	0	0	0	0	0	0	1	0	0	0	0	0	0		TP	TN	TN	TN	TN	TN
35956	227	1	1	1	1	227	1	0	0	0	0	0	0	1	0	0	0	0	0	0		35956	4773	1	1	1	1	4773	1	0	0	0	0	0	0	1	0	0	0	0	0	0		TP	TN	TN	TN	TN	TN
31293	228	1	1	1	1	228	1	0	0	0	0	0	0	1	0	0	0	0	0	0		31293	1720.1	1	1	1	1	1720	0	0	0	0	0	0	1	0	0	0	0	0	0	1		FN	TN	TN	TN	TN	TN
																						42896	1720.1	1	1	1	1
																						43275	1720.11	1	1	1	1
																						31617	1720.2	1	1	1	1
																						32032	1720.3	1	1	1	1
																						33361	1720.4	1	1	1	0
																						33983	1720.5	1	1	1	1
																						36746	1720.6	1	2	1	1
																						3771890	1720.7	1	1	1	1
																						39334	1720.8	1	0	0	0
																						42313	1720.9	1	1	1	1
42799	229	1	1	1	1	229	1	0	0	0	0	0	0	1	0	0	0	0	0	0		42799	8039	1	1	1	1	8039	1	0	0	0	0	0	0	1	0	0	0	0	0	0		TP	TN	TN	TN	TN	TN
42537	230	1	1	1	1	230	1	0	0	0	0	0	0	1	0	0	0	0	0	0		42537	9883	1	1	1	1	9883	1	0	0	0	0	0	0	1	0	0	0	0	0	0		TP	TN	TN	TN	TN	TN
43856	231	1	1	1	1	231	1	0	0	0	0	0	0	1	0	0	0	0	0	0		43856	9944	1	1	1	1	9944	1	0	0	0	0	0	0	1	0	0	0	0	0	0		TP	TN	TN	TN	TN	TN
44843	232	1	1	1	1	232	1	0	0	0	0	0	0	1	0	0	0	0	0	0		44843	8602	1	1	1	1	8602	1	0	0	0	0	0	0	1	0	0	0	0	0	0		TP	TN	TN	TN	TN	TN
33234	233	1	1	1	1	233	1	0	0	0	0	0	0	1	0	0	0	0	0	0		33234	9401	1	1	1	1	9401	1	0	0	0	0	0	0	1	0	0	0	0	0	0		TP	TN	TN	TN	TN	TN
31792	234	1	1	1	1	234	1	0	0	0	0	0	0	1	0	0	0	0	0	0		31792	2568	1	1	1	1	2568	1	0	0	0	0	0	0	1	0	0	0	0	0	0		TP	TN	TN	TN	TN	TN
34263	235	1	1	1	1	235	1	0	0	0	0	0	0	1	0	0	0	0	0	0		34263	4060	1	1	1	1	4060	1	0	0	0	0	0	0	1	0	0	0	0	0	0		TP	TN	TN	TN	TN	TN
33435	236	1	1	1	1	236	1	0	0	0	0	0	0	1	0	0	0	0	0	0		33435	3636	1	1	2	1	3636	0	0	0	0	1	0	0	0	0	0	0	1	0	0		FN	TN	TN	TN	FP	TN
32703	237	1	1	1	1	237	1	0	0	0	0	0	0	1	0	0	0	0	0	0		32703	3294	1	1	1	1	3294	1	0	0	0	0	0	0	1	0	0	0	0	0	0		TP	TN	TN	TN	TN	TN
40826	238	1	1	1	1	238	1	0	0	0	0	0	0	1	0	0	0	0	0	0		40826	9796	1	1	1	1	9796	1	0	0	0	0	0	0	1	0	0	0	0	0	0		TP	TN	TN	TN	TN	TN
40358	239	1	1	1	1	239	1	0	0	0	0	0	0
31391	240	1	1	1	1	240	1	0	0	0	0	0	0	1	0	0	0	0	0	0		31391	2337	1	1	1	1	2337	1	0	0	0	0	0	0	1	0	0	0	0	0	0		TP	TN	TN	TN	TN	TN
34286	241	1	1	1	1	241	1	0	0	0	0	0	0	1	0	0	0	0	0	0		34286	4067	1	1	1	1	4067	1	0	0	0	0	0	0	1	0	0	0	0	0	0		TP	TN	TN	TN	TN	TN
41363	242	1	1	1	1	242	1	0	0	0	0	0	0	1	0	0	0	0	0	0		41363	7437	1	1	1	1	7437	1	0	0	0	0	0	0	1	0	0	0	0	0	0		TP	TN	TN	TN	TN	TN
40260	243	1	1	1	1	243	1	0	0	0	0	0	0	1	0	0	0	0	0	0		40260	6911	1	1	1	1	6911	1	0	0	0	0	0	0	1	0	0	0	0	0	0		TP	TN	TN	TN	TN	TN
47873	244	1	1	1	1	244	1	0	0	0	0	0	0	1	0	0	0	0	0	0		47873	8702	1	1	0	1	8702	1	0	0	0	0	0	0	1	0	0	0	0	0	0		TP	TN	TN	TN	TN	TN
35851	245	1	1	1	1	245	1	0	0	0	0	0	0	1	0	0	0	0	0	0		35851	4723	1	1	1	1	4723	1	0	0	0	0	0	0	1	0	0	0	0	0	0		TP	TN	TN	TN	TN	TN
43664	246	1	1	1	1	246	1	0	0	0	0	0	0	1	0	0	0	0	0	0		43664	9932	1	1	1	1	9932	1	0	0	0	0	0	0	1	0	0	0	0	0	0		TP	TN	TN	TN	TN	TN
41094	247	1	1	1	1	247	1	0	0	0	0	0	0	1	0	0	0	0	0	0		41094	7318	1	1	1	1	7318	1	0	0	0	0	0	0	1	0	0	0	0	0	0		TP	TN	TN	TN	TN	TN
42501	248	1	1	1	1	248	1	0	0	0	0	0	0	1	0	0	0	0	0	0		34840	961.1	1	1	1	1	961	0	0	0	0	0	0	1	0	0	0	0	0	0	1		FN	TN	TN	TN	TN	TN
																						35577	961.2	1	1	1	1
																						36992	961.3	1	1	0	0
																						42501	961.4	1	1	1	1
33418	249	1	1	1	1	249	1	0	0	0	0	0	0	1	0	0	0	0	0	0		33418	9413	1	1	1	1	9413	1	0	0	0	0	0	0	1	0	0	0	0	0	0		TP	TN	TN	TN	TN	TN
47285	250	1	1	1	1	250	1	0	0	0	0	0	0	1	0	0	0	0	0	0		47285	9968	1	1	1	1	9968	1	0	0	0	0	0	0	1	0	0	0	0	0	0		TP	TN	TN	TN	TN	TN
37367	251	1	1	1	1	251	1	0	0	0	0	0	0	1	0	0	0	0	0	0		37367	9536	1	0	1	1	9536	1	0	0	0	0	0	0	1	0	0	0	0	0	0		TP	TN	TN	TN	TN	TN
33281	252	1	1	1	2	252	0	0	0	0	0	1	0	0	0	0	0	0	1	0		33281	3568	1	1	1	2	3568	0	0	0	0	0	1	0	0	0	0	0	0	1	0		TN	TN	TN	TN	TN	TP
45280	253	1	1	1	1	253	1	0	0	0	0	0	0	1	0	0	0	0	0	0		45280	8616	1	1	1	1	8616	1	0	0	0	0	0	0	1	0	0	0	0	0	0		TP	TN	TN	TN	TN	TN
36411	254	1	1	1	1	254	1	0	0	0	0	0	0	1	0	0	0	0	0	0		36411	9503	1	1	1	1	9503	1	0	0	0	0	0	0	1	0	0	0	0	0	0		TP	TN	TN	TN	TN	TN
40833	255	1	1	1	1	255	1	0	0	0	0	0	0	1	0	0	0	0	0	0		40833	9800	1	0	1	1	9800	1	0	0	0	0	0	0	1	0	0	0	0	0	0		TP	TN	TN	TN	TN	TN
31617	256	1	1	1	1	256	1	0	0	0	0	0	0	1	0	0	0	0	0	0		31293	1720.1	1	1	1	1	1720	0	0	0	0	0	0	1	0	0	0	0	0	0	1		FN	TN	TN	TN	TN	TN
																						42896	1720.1	1	1	1	1
																						43275	1720.11	1	1	1	1
																						31617	1720.2	1	1	1	1
																						32032	1720.3	1	1	1	1
																						33361	1720.4	1	1	1	0
																						33983	1720.5	1	1	1	1
																						36746	1720.6	1	2	1	1
																						3771890	1720.7	1	1	1	1
																						39334	1720.8	1	0	0	0
																						42313	1720.9	1	1	1	1
36171	257	1	1	1	1	257	1	0	0	0	0	0	0	1	0	0	0	0	0	0		36171	4875	1	1	1	1	4875	1	0	0	0	0	0	0	1	0	0	0	0	0	0		TP	TN	TN	TN	TN	TN
36746	258	1	1	1	1	258	1	0	0	0	0	0	0	1	0	0	0	0	0	0		31293	1720.1	1	1	1	1	1720	0	0	0	0	0	0	1	0	0	0	0	0	0	1		FN	TN	TN	TN	TN	TN
																						42896	1720.1	1	1	1	1
																						43275	1720.11	1	1	1	1
																						31617	1720.2	1	1	1	1
																						32032	1720.3	1	1	1	1
																						33361	1720.4	1	1	1	0
																						33983	1720.5	1	1	1	1
																						36746	1720.6	1	2	1	1
																						3771890	1720.7	1	1	1	1
																						39334	1720.8	1	0	0	0
																						42313	1720.9	1	1	1	1
32498	259	1	1	1	1	259	1	0	0	0	0	0	0	1	0	0	0	0	0	0		32498	3127	1	1	1	1	3127	1	0	0	0	0	0	0	1	0	0	0	0	0	0		TP	TN	TN	TN	TN	TN
34946	260	1	1	1	1	260	1	0	0	0	0	0	0	1	0	0	0	0	0	0		34946	4359	1	1	1	1	4359	1	0	0	0	0	0	0	1	0	0	0	0	0	0		TP	TN	TN	TN	TN	TN
41988	261	1	1	1	1	261	1	0	0	0	0	0	0	1	0	0	0	0	0	0		41988	7698	1	1	1	1	7698	1	0	0	0	0	0	0	1	0	0	0	0	0	0		TP	TN	TN	TN	TN	TN
41770	262	1	1	1	1	262	1	0	0	0	0	0	0	1	0	0	0	0	0	0		41770	7593	1	1	1	1	7593	1	0	0	0	0	0	0	1	0	0	0	0	0	0		TP	TN	TN	TN	TN	TN
41740	263	1	1	1	1	263	1	0	0	0	0	0	0	1	0	0	0	0	0	0		41740	9837	1	1	1	1	9837	1	0	0	0	0	0	0	1	0	0	0	0	0	0		TP	TN	TN	TN	TN	TN
43825	264	1	1	1	1	264	1	0	0	0	0	0	0	1	0	0	0	0	0	0		43812	1825.1	1	1	0	0	1825	0	1	0	0	0	0	0	0	1	0	0	0	0	0		FN	FP	TN	TN	TN	TN
																						43825	1825.2	1	1	1	1
																						43833	1825.3	1	1	2	2
39164	265	1	1	1	1	265	1	0	0	0	0	0	0	1	0	0	0	0	0	0		39164	6354	1	1	1	1	6354	1	0	0	0	0	0	0	1	0	0	0	0	0	0		TP	TN	TN	TN	TN	TN
39765	266	1	1	1	1	266	1	0	0	0	0	0	0	1	0	0	0	0	0	0		39765	6647	1	1	1	1	6647	1	0	0	0	0	0	0	1	0	0	0	0	0	0		TP	TN	TN	TN	TN	TN
32792	267	1	1	1	1	267	1	0	0	0	0	0	0	1	0	0	0	0	0	0		32792	3341	1	1	1	1	3341	1	0	0	0	0	0	0	1	0	0	0	0	0	0		TP	TN	TN	TN	TN	TN
36405	268	1	1	1	1	268	1	0	0	0	0	0	0	1	0	0	0	0	0	0		36405	4985	1	1	1	1	4985	1	0	0	0	0	0	0	1	0	0	0	0	0	0		TP	TN	TN	TN	TN	TN
42037	269	1	1	1	1	269	1	0	0	0	0	0	0	1	0	0	0	0	0	0		42034	1703.1	1	1	1	1	1703	0	1	0	0	0	0	0	0	1	0	0	0	0	0		FN	FP	TN	TN	TN	TN
																						42037	1703.2	1	1	1	1
35051	270	1	1	1	1	270	1	0	0	0	0	0	0	1	0	0	0	0	0	0		35051	4400	1	1	1	1	4400	1	0	0	0	0	0	0	1	0	0	0	0	0	0		TP	TN	TN	TN	TN	TN
39048	271	1	1	1	1	271	1	0	0	0	0	0	0	1	0	0	0	0	0	0		39048	9730	1	1	1	1	9730	1	0	0	0	0	0	0	1	0	0	0	0	0	0		TP	TN	TN	TN	TN	TN
318206	272	1	1	1	1	272	1	0	0	0	0	0	0	1	0	0	0	0	0	0		318206	9327	1	1	1	1	9327	1	0	0	0	0	0	0	1	0	0	0	0	0	0		TP	TN	TN	TN	TN	TN
47396	273	1	1	1	1	273	1	0	0	0	0	0	0	1	0	0	0	0	0	0		41839	1694.1	1	1	1	1	1694	0	1	0	0	0	0	0	0	1	0	0	0	0	0		FN	FP	TN	TN	TN	TN
																						47396	1694.2	1	1	1	1
36241	274	1	1	1	1	274	1	0	0	0	0	0	0	1	0	0	0	0	0	0		36241	9495	1	1	1	1	9495	1	0	0	0	0	0	0	1	0	0	0	0	0	0		TP	TN	TN	TN	TN	TN
43582	275	1	1	1	1	275	1	0	0	0	0	0	0	1	0	0	0	0	0	0		43582	8365	1	1	1	1	8365	1	0	0	0	0	0	0	1	0	0	0	0	0	0		TP	TN	TN	TN	TN	TN
36444	276	1	1	1	1	276	1	0	0	0	0	0	0	1	0	0	0	0	0	0		36444	4996	1	1	1	1	4996	1	0	0	0	0	0	0	1	0	0	0	0	0	0		TP	TN	TN	TN	TN	TN
42564	277	1	1	1	1	277	1	0	0	0	0	0	0	1	0	0	0	0	0	0		42564	7946	1	1	1	1	7946	1	0	0	0	0	0	0	1	0	0	0	0	0	0		TP	TN	TN	TN	TN	TN
32119	278	1	1	1	1	278	1	0	0	0	0	0	0	1	0	0	0	0	0	0		32119	2964	1	1	1	1	2964	1	0	0	0	0	0	0	1	0	0	0	0	0	0		TP	TN	TN	TN	TN	TN
37417	279	1	1	1	1	279	1	0	0	0	0	0	0	1	0	0	0	0	0	0		37417	5439	1	1	1	1	5439	1	0	0	0	0	0	0	1	0	0	0	0	0	0		TP	TN	TN	TN	TN	TN
37655	280	1	1	1	1	280	1	0	0	0	0	0	0	1	0	0	0	0	0	0		2768661	1234.1	1	1	1	1	1234	0	0	0	0	0	0	1	0	0	0	0	0	0	1		FN	TN	TN	TN	TN	TN
																						43190	1234.1	1	1	2	0
																						34379	1234.2	1	1	1	1
																						35110	1234.3	1	1	1	1
																						36813	1234.4	1	1	1	1
																						37027	1234.5	1	1	1	1
																						37655	1234.6	1	1	1	1
																						40975	1234.7	1	2	1	1
																						41411	1234.8	1	1	1	1
																						41961	1234.9	1	1	1	1
42034	281	1	1	1	1	281	1	0	0	0	0	0	0	1	0	0	0	0	0	0		42034	1703.1	1	1	1	1	1703	0	1	0	0	0	0	0	0	1	0	0	0	0	0		FN	FP	TN	TN	TN	TN
																						42037	1703.2	1	1	1	1
33225	282	1	1	1	1	282	1	0	0	0	0	0	0	1	0	0	0	0	0	0		33225	3538	1	1	1	1	3538	1	0	0	0	0	0	0	1	0	0	0	0	0	0		TP	TN	TN	TN	TN	TN
35922	283	1	1	1	1	283	1	0	0	0	0	0	0	1	0	0	0	0	0	0		35922	4754	1	1	1	1	4754	1	0	0	0	0	0	0	1	0	0	0	0	0	0		TP	TN	TN	TN	TN	TN
33208	284	1	1	1	1	284	1	0	0	0	0	0	0	1	0	0	0	0	0	0		33208	9398	1	1	1	1	9398	1	0	0	0	0	0	0	1	0	0	0	0	0	0		TP	TN	TN	TN	TN	TN
38638	285	1	1	1	1	285	1	0	0	0	0	0	0	1	0	0	0	0	0	0		38638	9704	1	1	1	1	9704	1	0	0	0	0	0	0	1	0	0	0	0	0	0		TP	TN	TN	TN	TN	TN
45318	286	1	1	1	1	286	1	0	0	0	0	0	0	1	0	0	0	0	0	0		45318	8618	1	2	1	1	8618	0	0	0	1	0	0	0	0	0	0	1	0	0	0		FN	TN	TN	FP	TN	TN
45339	287	1	1	1	1	287	1	0	0	0	0	0	0	1	0	0	0	0	0	0		45339	8622	1	1	1	1	8622	1	0	0	0	0	0	0	1	0	0	0	0	0	0		TP	TN	TN	TN	TN	TN
43275	288	1	1	1	1	288	1	0	0	0	0	0	0	1	0	0	0	0	0	0		31293	1720.1	1	1	1	1	1720	0	0	0	0	0	0	1	0	0	0	0	0	0	1		FN	TN	TN	TN	TN	TN
																						42896	1720.1	1	1	1	1
																						43275	1720.11	1	1	1	1
																						31617	1720.2	1	1	1	1
																						32032	1720.3	1	1	1	1
																						33361	1720.4	1	1	1	0
																						33983	1720.5	1	1	1	1
																						36746	1720.6	1	2	1	1
																						3771890	1720.7	1	1	1	1
																						39334	1720.8	1	0	0	0
																						42313	1720.9	1	1	1	1
39049	289	1	1	1	1	289	1	0	0	0	0	0	0	1	0	0	0	0	0	0		39049	6300	1	1	1	1	6300	1	0	0	0	0	0	0	1	0	0	0	0	0	0		TP	TN	TN	TN	TN	TN
36421	290	1	1	1	1	290	1	0	0	0	0	0	0	1	0	0	0	0	0	0		36421	4989	1	1	1	1	4989	1	0	0	0	0	0	0	1	0	0	0	0	0	0		TP	TN	TN	TN	TN	TN
44505	291	1	1	1	1	291	1	0	0	0	0	0	0	1	0	0	0	0	0	0		44505	9953	1	1	2	2	9953	0	0	0	0	0	0	1	0	0	0	0	0	0	1		FN	TN	TN	TN	TN	TN
31665	292	1	1	1	1	292	1	0	0	0	0	0	0	1	0	0	0	0	0	0		31665	2460	1	1	1	1	2460	1	0	0	0	0	0	0	1	0	0	0	0	0	0		TP	TN	TN	TN	TN	TN
37890	293	1	1	1	1	293	1	0	0	0	0	0	0	1	0	0	0	0	0	0		37890	5731	1	1	1	1	5731	1	0	0	0	0	0	0	1	0	0	0	0	0	0		TP	TN	TN	TN	TN	TN
35266	294	1	1	1	1	294	1	0	0	0	0	0	0	1	0	0	0	0	0	0		35266	9465	1	1	1	1	9465	1	0	0	0	0	0	0	1	0	0	0	0	0	0		TP	TN	TN	TN	TN	TN
43331	295	1	1	1	1	295	1	0	0	0	0	0	0	1	0	0	0	0	0	0		43331	8270	1	1	1	1	8270	1	0	0	0	0	0	0	1	0	0	0	0	0	0		TP	TN	TN	TN	TN	TN
47763	296	1	1	1	1	296	1	0	0	0	0	0	0	1	0	0	0	0	0	0		47763	9969	1	1	1	1	9969	1	0	0	0	0	0	0	1	0	0	0	0	0	0		TP	TN	TN	TN	TN	TN
42544	297	1	1	1	1	297	1	0	0	0	0	0	0	1	0	0	0	0	0	0		42544	9884	1	1	1	1	9884	1	0	0	0	0	0	0	1	0	0	0	0	0	0		TP	TN	TN	TN	TN	TN
33043	298	1	1	1	1	298	1	0	0	0	0	0	0	1	0	0	0	0	0	0		33043	3456	1	1	1	1	3456	1	0	0	0	0	0	0	1	0	0	0	0	0	0		TP	TN	TN	TN	TN	TN
41441	299	1	1	1	1	299	1	0	0	0	0	0	0	1	0	0	0	0	0	0		33245	1646.1	1	1	1	1	1646	0	1	0	0	0	0	0	0	1	0	0	0	0	0		FN	FP	TN	TN	TN	TN
																						33627	1646.2	1	1	1	1
																						36125	1646.3	1	1	1	1
																						41302	1646.4	1	1	1	1
																						41441	1646.5	1	1	1	1
41774	300	1	1	1	1	300	1	0	0	0	0	0	0	1	0	0	0	0	0	0		41774	7595	1	1	1	1	7595	1	0	0	0	0	0	0	1	0	0	0	0	0	0		TP	TN	TN	TN	TN	TN
42006	301	1	1	1	1	301	1	0	0	0	0	0	0	1	0	0	0	0	0	0		42006	7707	1	1	1	1	7707	1	0	0	0	0	0	0	1	0	0	0	0	0	0		TP	TN	TN	TN	TN	TN
43033	302	1	1	1	1	302	1	0	0	0	0	0	0	1	0	0	0	0	0	0		43033	8166	1	1	1	1	8166	1	0	0	0	0	0	0	1	0	0	0	0	0	0		TP	TN	TN	TN	TN	TN
43528	303	1	1	1	1	303	1	0	0	0	0	0	0	1	0	0	0	0	0	0		43528	8340	1	1	1	1	8340	1	0	0	0	0	0	0	1	0	0	0	0	0	0		TP	TN	TN	TN	TN	TN
45233	304	1	1	1	1	304	1	0	0	0	0	0	0	1	0	0	0	0	0	0		45233	8613	1	1	1	1	8613	1	0	0	0	0	0	0	1	0	0	0	0	0	0		TP	TN	TN	TN	TN	TN
33611	305	1	1	1	1	305	1	0	0	0	0	0	0	1	0	0	0	0	0	0		33611	3772	1	1	1	1	3772	1	0	0	0	0	0	0	1	0	0	0	0	0	0		TP	TN	TN	TN	TN	TN
42066	306	1	1	1	1	306	1	0	0	0	0	0	0	1	0	0	0	0	0	0		42066	9853	1	1	1	1	9853	1	0	0	0	0	0	0	1	0	0	0	0	0	0		TP	TN	TN	TN	TN	TN
37837	307	1	1	1	1	307	1	0	0	0	0	0	0	1	0	0	0	0	0	0		37837	5703	1	1	1	2	5703	0	0	0	0	0	1	0	0	0	0	0	0	1	0		FN	TN	TN	TN	TN	FP
43690	308	1	1	1	1	308	1	0	0	0	0	0	0	1	0	0	0	0	0	0		43690	8412	1	1	1	1	8412	1	0	0	0	0	0	0	1	0	0	0	0	0	0		TP	TN	TN	TN	TN	TN
53560	309	1	1	1	1	309	1	0	0	0	0	0	0	1	0	0	0	0	0	0		3772670	1334.1	1	2	1	1	1334	0	0	0	1	0	0	0	0	0	0	1	0	0	0		FN	TN	TN	FP	TN	TN
																						53560	1334.2	1	1	1	1
42743	310	1	1	1	1	310	1	0	0	0	0	0	0	1	0	0	0	0	0	0		42743	8026	1	1	1	1	8026	1	0	0	0	0	0	0	1	0	0	0	0	0	0		TP	TN	TN	TN	TN	TN
40620	311	1	1	1	1	311	1	0	0	0	0	0	0	1	0	0	0	0	0	0		40620	1595.1	1	1	1	1	1595	0	1	0	0	0	0	0	0	1	0	0	0	0	0		FN	FP	TN	TN	TN	TN
																						46194	1595.2	1	1	1	1
35653	312	1	1	1	1	312	1	0	0	0	0	0	0	1	0	0	0	0	0	0		35653	4645	1	1	1	1	4645	1	0	0	0	0	0	0	1	0	0	0	0	0	0		TP	TN	TN	TN	TN	TN
42896	313	1	1	1	1	313	1	0	0	0	0	0	0	1	0	0	0	0	0	0		31293	1720.1	1	1	1	1	1720	0	0	0	0	0	0	1	0	0	0	0	0	0	1		FN	TN	TN	TN	TN	TN
																						42896	1720.1	1	1	1	1
																						43275	1720.11	1	1	1	1
																						31617	1720.2	1	1	1	1
																						32032	1720.3	1	1	1	1
																						33361	1720.4	1	1	1	0
																						33983	1720.5	1	1	1	1
																						36746	1720.6	1	2	1	1
																						3771890	1720.7	1	1	1	1
																						39334	1720.8	1	0	0	0
																						42313	1720.9	1	1	1	1
40374	314	1	1	1	1	314	1	0	0	0	0	0	0	1	0	0	0	0	0	0		40374	9770	1	1	1	1	9770	1	0	0	0	0	0	0	1	0	0	0	0	0	0		TP	TN	TN	TN	TN	TN
41398	315	1	1	1	1	315	1	0	0	0	0	0	0	1	0	0	0	0	0	0		33262	1651.1	1	1	1	1	1651	0	1	0	0	0	0	0	0	1	0	0	0	0	0		FN	FP	TN	TN	TN	TN
																						34132	1651.2	1	1	1	1
																						35524	1651.3	1	1	1	1
																						36497	1651.4	1	1	1	1
																						41398	1651.5	1	1	1	1
																						45821	1651.6	1	1	1	1
																						48973	1651.7	1	1	1	1
45278	316	1	1	1	1	316	1	0	0	0	0	0	0	1	0	0	0	0	0	0		45278	9961	1	1	1	1	9961	1	0	0	0	0	0	0	1	0	0	0	0	0	0		TP	TN	TN	TN	TN	TN
34179	317	1	1	1	1	317	1	0	0	0	0	0	0	1	0	0	0	0	0	0		34179	4035	1	1	1	1	4035	1	0	0	0	0	0	0	1	0	0	0	0	0	0		TP	TN	TN	TN	TN	TN
34413	318	1	1	1	1	318	1	0	0	0	0	0	0	1	0	0	0	0	0	0		34413	4133	1	1	1	1	4133	1	0	0	0	0	0	0	1	0	0	0	0	0	0		TP	TN	TN	TN	TN	TN
39866	319	1	1	1	1	319	1	0	0	0	0	0	0	1	0	0	0	0	0	0		39866	6711	1	1	1	1	6711	1	0	0	0	0	0	0	1	0	0	0	0	0	0		TP	TN	TN	TN	TN	TN
34982	320	1	1	1	1	320	1	0	0	0	0	0	0	1	0	0	0	0	0	0		34982	4378	1	1	1	1	4378	1	0	0	0	0	0	0	1	0	0	0	0	0	0		TP	TN	TN	TN	TN	TN
40832	321	1	1	1	1	321	1	0	0	0	0	0	0	1	0	0	0	0	0	0		40832	9799	1	1	1	2	9799	0	0	0	0	0	1	0	0	0	0	0	0	1	0		FN	TN	TN	TN	TN	FP
44274	322	1	1	1	1	322	1	0	0	0	0	0	0	1	0	0	0	0	0	0		44274	8567	1	1	1	1	8567	1	0	0	0	0	0	0	1	0	0	0	0	0	0		TP	TN	TN	TN	TN	TN
42313	323	1	1	1	1	323	1	0	0	0	0	0	0	1	0	0	0	0	0	0		31293	1720.1	1	1	1	1	1720	0	0	0	0	0	0	1	0	0	0	0	0	0	1		FN	TN	TN	TN	TN	TN
																						42896	1720.1	1	1	1	1
																						43275	1720.11	1	1	1	1
																						31617	1720.2	1	1	1	1
																						32032	1720.3	1	1	1	1
																						33361	1720.4	1	1	1	0
																						33983	1720.5	1	1	1	1
																						36746	1720.6	1	2	1	1
																						3771890	1720.7	1	1	1	1
																						39334	1720.8	1	0	0	0
																						42313	1720.9	1	1	1	1
37973	324	1	1	1	1	324	1	0	0	0	0	0	0	1	0	0	0	0	0	0		37973	9677	1	1	1	1	9677	1	0	0	0	0	0	0	1	0	0	0	0	0	0		TP	TN	TN	TN	TN	TN
38321	325	1	1	1	1	325	1	0	0	0	0	0	0	1	0	0	0	0	0	0		38321	5926	1	1	1	1	5926	1	0	0	0	0	0	0	1	0	0	0	0	0	0		TP	TN	TN	TN	TN	TN
45285	326	1	1	2	2	326	0	0	0	0	1	1	0	0	0	0	0	1	1	0		45285	9962	1	1	2	2	9962	0	0	0	0	0	0	1	0	0	0	0	0	0	1		TN	TN	TN	TN	FN	FN
32078	327	1	1	1	1	327	1	0	0	0	0	0	0	1	0	0	0	0	0	0		32078	2947	1	1	1	1	2947	1	0	0	0	0	0	0	1	0	0	0	0	0	0		TP	TN	TN	TN	TN	TN
37546	328	1	1	1	1	328	1	0	0	0	0	0	0	1	0	0	0	0	0	0		37546	5494	1	1	1	1	5494	1	0	0	0	0	0	0	1	0	0	0	0	0	0		TP	TN	TN	TN	TN	TN
31589	329	1	1	1	1	329	1	0	0	0	0	0	0	1	0	0	0	0	0	0		31589	2423	1	1	1	1	2423	1	0	0	0	0	0	0	1	0	0	0	0	0	0		TP	TN	TN	TN	TN	TN
35540	330	1	1	1	1	330	1	0	0	0	0	0	0	1	0	0	0	0	0	0		35540	9475	1	1	1	1	9475	1	0	0	0	0	0	0	1	0	0	0	0	0	0		TP	TN	TN	TN	TN	TN
37455	331	1	1	1	1	331	1	0	0	0	0	0	0	1	0	0	0	0	0	0		37455	9540	1	1	1	1	9540	1	0	0	0	0	0	0	1	0	0	0	0	0	0		TP	TN	TN	TN	TN	TN
2768870	332	1	1	1	1	332	1	0	0	0	0	0	0	1	0	0	0	0	0	0		2768870	2082	1	1	1	1	2082	1	0	0	0	0	0	0	1	0	0	0	0	0	0		TP	TN	TN	TN	TN	TN
31239	333	1	1	1	1	333	1	0	0	0	0	0	0	1	0	0	0	0	0	0		31239	2261	1	1	1	1	2261	1	0	0	0	0	0	0	1	0	0	0	0	0	0		TP	TN	TN	TN	TN	TN
37757	334	1	1	1	1	334	1	0	0	0	0	0	0	1	0	0	0	0	0	0		37757	5665	1	1	1	1	5665	1	0	0	0	0	0	0	1	0	0	0	0	0	0		TP	TN	TN	TN	TN	TN
38091	335	1	2	1	1	335	0	0	0	1	0	0	0	0	0	0	1	0	0	0		38091	5830	1	2	1	1	5830	0	0	0	1	0	0	0	0	0	0	1	0	0	0		TN	TN	TN	TP	TN	TN
44543	336	1	1	1	1	336	1	0	0	0	0	0	0	1	0	0	0	0	0	0		44543	8583	1	1	1	1	8583	1	0	0	0	0	0	0	1	0	0	0	0	0	0		TP	TN	TN	TN	TN	TN
43803	337	1	1	1	1	337	1	0	0	0	0	0	0	1	0	0	0	0	0	0		43803	9942	1	1	1	1	9942	1	0	0	0	0	0	0	1	0	0	0	0	0	0		TP	TN	TN	TN	TN	TN
36039	338	1	1	1	1	338	1	0	0	0	0	0	0	1	0	0	0	0	0	0		36039	9488	1	1	1	1	9488	1	0	0	0	0	0	0	1	0	0	0	0	0	0		TP	TN	TN	TN	TN	TN
32567	339	1	1	1	1	339	1	0	0	0	0	0	0	1	0	0	0	0	0	0		32567	3161	1	1	1	1	3161	1	0	0	0	0	0	0	1	0	0	0	0	0	0		TP	TN	TN	TN	TN	TN
33916	340	1	1	1	1	340	1	0	0	0	0	0	0	1	0	0	0	0	0	0		33916	3915	1	1	1	1	3915	1	0	0	0	0	0	0	1	0	0	0	0	0	0		TP	TN	TN	TN	TN	TN
3771890	341	1	1	1	1	341	1	0	0	0	0	0	0	1	0	0	0	0	0	0		31293	1720.1	1	1	1	1	1720	0	0	0	0	0	0	1	0	0	0	0	0	0	1		FN	TN	TN	TN	TN	TN
																						42896	1720.1	1	1	1	1
																						43275	1720.11	1	1	1	1
																						31617	1720.2	1	1	1	1
																						32032	1720.3	1	1	1	1
																						33361	1720.4	1	1	1	0
																						33983	1720.5	1	1	1	1
																						36746	1720.6	1	2	1	1
																						3771890	1720.7	1	1	1	1
																						39334	1720.8	1	0	0	0
																						42313	1720.9	1	1	1	1
40835	342	1	1	1	1	342	1	0	0	0	0	0	0	1	0	0	0	0	0	0		40835	7198	1	1	1	1	7198	1	0	0	0	0	0	0	1	0	0	0	0	0	0		TP	TN	TN	TN	TN	TN
32718	343	1	1	1	1	343	1	0	0	0	0	0	0	1	0	0	0	0	0	0		32718	3304	1	1	1	1	3304	1	0	0	0	0	0	0	1	0	0	0	0	0	0		TP	TN	TN	TN	TN	TN
42025	344	1	1	2	1	344	0	0	0	0	1	0	0	0	0	0	0	1	0	0		42025	7715	1	1	2	1	7715	0	0	0	0	1	0	0	0	0	0	0	1	0	0		TN	TN	TN	TN	TP	TN
31364	345	1	1	1	1	345	1	0	0	0	0	0	0	1	0	0	0	0	0	0		31364	2319	1	1	1	1	2319	1	0	0	0	0	0	0	1	0	0	0	0	0	0		TP	TN	TN	TN	TN	TN
46234	346	1	1	1	1	346	1	0	0	0	0	0	0	1	0	0	0	0	0	0		46234	8672	1	1	1	1	8672	1	0	0	0	0	0	0	1	0	0	0	0	0	0		TP	TN	TN	TN	TN	TN
40314	347	1	1	1	1	347	1	0	0	0	0	0	0	1	0	0	0	0	0	0		40314	6947	1	1	1	1	6947	1	0	0	0	0	0	0	1	0	0	0	0	0	0		TP	TN	TN	TN	TN	TN
36377	348	1	1	1	1	348	1	0	0	0	0	0	0	1	0	0	0	0	0	0		36377	4967	1	1	1	1	4967	1	0	0	0	0	0	0	1	0	0	0	0	0	0		TP	TN	TN	TN	TN	TN
42226	349	1	1	1	1	349	1	0	0	0	0	0	0	1	0	0	0	0	0	0		42226	9863	1	1	1	1	9863	1	0	0	0	0	0	0	1	0	0	0	0	0	0		TP	TN	TN	TN	TN	TN
39122	350	1	1	1	1	350	1	0	0	0	0	0	0	1	0	0	0	0	0	0		39122	6332	1	1	1	1	6332	1	0	0	0	0	0	0	1	0	0	0	0	0	0		TP	TN	TN	TN	TN	TN
32855	351	1	1	1	1	351	1	0	0	0	0	0	0	1	0	0	0	0	0	0		32855	9391	1	1	1	1	9391	1	0	0	0	0	0	0	1	0	0	0	0	0	0		TP	TN	TN	TN	TN	TN
33392	352	1	1	1	1	352	1	0	0	0	0	0	0	1	0	0	0	0	0	0		33392	9411	1	1	1	1	9411	1	0	0	0	0	0	0	1	0	0	0	0	0	0		TP	TN	TN	TN	TN	TN
36990	353	1	1	1	1	353	1	0	0	0	0	0	0	1	0	0	0	0	0	0		36084	1130.1	1	1	1	1	1130	0	1	0	0	0	0	0	0	1	0	0	0	0	0		FN	FP	TN	TN	TN	TN
																						36990	1130.2	1	1	1	1
5740544	354	1	1	1	1	354	1	0	0	0	0	0	0	1	0	0	0	0	0	0		5740544	9007	1	1	1	1	9007	1	0	0	0	0	0	0	1	0	0	0	0	0	0		TP	TN	TN	TN	TN	TN
34166	355	1	1	1	1	355	1	0	0	0	0	0	0	1	0	0	0	0	0	0		34166	4027	1	1	1	1	4027	1	0	0	0	0	0	0	1	0	0	0	0	0	0		TP	TN	TN	TN	TN	TN
39158	356	1	1	1	1	356	1	0	0	0	0	0	0	1	0	0	0	0	0	0		32569	565.1	1	1	1	1	565	0	1	0	0	0	0	0	0	1	0	0	0	0	0		FN	FP	TN	TN	TN	TN
																						39158	565.2	1	1	1	1
35864	357	1	1	1	1	357	1	0	0	0	0	0	0	1	0	0	0	0	0	0		35864	4724	1	1	1	1	4724	1	0	0	0	0	0	0	1	0	0	0	0	0	0		TP	TN	TN	TN	TN	TN
42210	358	1	1	1	1	358	1	0	0	0	0	0	0	1	0	0	0	0	0	0		40309	1568.1	1	1	1	1	1568	0	1	0	0	0	0	0	0	1	0	0	0	0	0		FN	FP	TN	TN	TN	TN
																						42210	1568.2	1	1	1	1
34927	359	1	1	1	1	359	1	0	0	0	0	0	0	1	0	0	0	0	0	0		34927	9455	1	1	1	1	9455	1	0	0	0	0	0	0	1	0	0	0	0	0	0		TP	TN	TN	TN	TN	TN
33240	360	1	1	1	1	360	1	0	0	0	0	0	0	1	0	0	0	0	0	0		33240	9403	1	1	1	1	9403	1	0	0	0	0	0	0	1	0	0	0	0	0	0		TP	TN	TN	TN	TN	TN
42445	361	1	1	1	1	361	1	0	0	0	0	0	0	1	0	0	0	0	0	0		42445	7895	1	1	1	1	7895	1	0	0	0	0	0	0	1	0	0	0	0	0	0		TP	TN	TN	TN	TN	TN
31842	362	1	1	1	1	362	1	0	0	0	0	0	0	1	0	0	0	0	0	0		31842	2691	1	3	1	1	2691	0	0	0	1	0	0	0	0	0	0	1	0	0	0		FN	TN	TN	FP	TN	TN
41161	363	1	1	1	1	363	1	0	0	0	0	0	0	1	0	0	0	0	0	0		246488	36.1	1	0	0	0	36	0	0	0	0	0	0	1	0	0	0	0	0	0	1		FN	TN	TN	TN	TN	TN
																						31978	36.2	1	0	0	0
																						33308	36.3	1	2	4	2
																						34984	36.4	1	1	1	1
																						36797	36.5	1	1	1	1
																						38643	36.6	1	0	0	0
																						40450	36.7	1	0	0	0
																						41161	36.8	1	1	1	1
40045	364	1	1	1	1	364	1	0	0	0	0	0	0	1	0	0	0	0	0	0		31162	178.1	1	1	1	1	178	0	1	0	0	0	0	0	0	1	0	0	0	0	0		FN	FP	TN	TN	TN	TN
																						35398	178.2	1	1	1	1
																						40045	178.3	1	1	1	1
35969	365	1	1	1	2	365	0	0	0	0	0	1	0	0	0	0	0	0	1	0		35969	4779	1	1	1	2	4779	0	0	0	0	0	1	0	0	0	0	0	0	1	0		TN	TN	TN	TN	TN	TP
39529	366	1	0	1	1	366	1	0	0	0	0	0	0	1	0	0	0	0	0	0		39529	6537	1	0	1	1	6537	1	0	0	0	0	0	0	1	0	0	0	0	0	0		TP	TN	TN	TN	TN	TN
40981	367	1	1	1	1	367	1	0	0	0	0	0	0	1	0	0	0	0	0	0		40981	7260	1	1	1	1	7260	1	0	0	0	0	0	0	1	0	0	0	0	0	0		TP	TN	TN	TN	TN	TN
41153	368	1	1	1	1	368	1	0	0	0	0	0	0	1	0	0	0	0	0	0		41153	7347	1	1	1	1	7347	1	0	0	0	0	0	0	1	0	0	0	0	0	0		TP	TN	TN	TN	TN	TN
33434	369	1	1	1	1	369	1	0	0	0	0	0	0	1	0	0	0	0	0	0		33434	3635	1	1	1	1	3635	1	0	0	0	0	0	0	1	0	0	0	0	0	0		TP	TN	TN	TN	TN	TN
32396	370	1	1	1	1	370	1	0	0	0	0	0	0	1	0	0	0	0	0	0		32396	3084	1	1	2	2	3084	0	0	0	0	0	0	1	0	0	0	0	0	0	1		FN	TN	TN	TN	TN	TN
36084	371	1	1	1	1	371	1	0	0	0	0	0	0	1	0	0	0	0	0	0		36084	1130.1	1	1	1	1	1130	0	1	0	0	0	0	0	0	1	0	0	0	0	0		FN	FP	TN	TN	TN	TN
																						36990	1130.2	1	1	1	1
38493	372	1	1	1	1	372	1	0	0	0	0	0	0	1	0	0	0	0	0	0		38493	6012	1	1	1	1	6012	1	0	0	0	0	0	0	1	0	0	0	0	0	0		TP	TN	TN	TN	TN	TN
44132	373	1	1	1	1	373	1	0	0	0	0	0	0	1	0	0	0	0	0	0		44132	8551	1	1	1	1	8551	1	0	0	0	0	0	0	1	0	0	0	0	0	0		TP	TN	TN	TN	TN	TN
43739	374	1	1	1	1	374	1	0	0	0	0	0	0	1	0	0	0	0	0	0		43739	8437	1	1	1	1	8437	1	0	0	0	0	0	0	1	0	0	0	0	0	0		TP	TN	TN	TN	TN	TN
34984	375	1	1	1	1	375	1	0	0	0	0	0	0	1	0	0	0	0	0	0		246488	36.1	1	0	0	0	36	0	0	0	0	0	0	1	0	0	0	0	0	0	1		FN	TN	TN	TN	TN	TN
																						31978	36.2	1	0	0	0
																						33308	36.3	1	2	4	2
																						34984	36.4	1	1	1	1
																						36797	36.5	1	1	1	1
																						38643	36.6	1	0	0	0
																						40450	36.7	1	0	0	0
																						41161	36.8	1	1	1	1
35007	376	1	1	1	1	376	1	0	0	0	0	0	0	1	0	0	0	0	0	0		32028	987.1	1	1	1	1	987	0	0	0	0	0	0	1	0	0	0	0	0	0	1		FN	TN	TN	TN	TN	TN
																						34882	987.2	1	1	2	1
																						35007	987.3	1	1	1	1
																						35680	987.4	1	1	1	1
																						38001	987.5	1	1	1	1
																						53515	987.6	1	0	0	0
																						8673978	987.7	1	0	0	0
33211	377	1	1	1	1	377	1	0	0	0	0	0	0	1	0	0	0	0	0	0		33211	3527	1	1	1	1	3527	1	0	0	0	0	0	0	1	0	0	0	0	0	0		TP	TN	TN	TN	TN	TN
34592	378	1	1	1	1	378	1	0	0	0	0	0	0	1	0	0	0	0	0	0		33536	1577.1	1	0	1	0	1577	0	0	0	0	0	0	1	0	0	0	0	0	0	1		FN	TN	TN	TN	TN	TN
																						33657	1577.2	1	1	1	0
																						34483	1577.3	1	0	0	0
																						34592	1577.4	1	5	7	5
																						36571	1577.5	1	1	1	1
																						39539	1577.6	1	1	0	1
																						40375	1577.7	1	0	0	0
																						40414	1577.8	1	1	1	1
																						41530	1577.9	1	1	0	1
35398	379	1	1	1	1	379	1	0	0	0	0	0	0	1	0	0	0	0	0	0		31162	178.1	1	1	1	1	178	0	1	0	0	0	0	0	0	1	0	0	0	0	0		FN	FP	TN	TN	TN	TN
																						35398	178.2	1	1	1	1
																						40045	178.3	1	1	1	1
	TOTAL													205	111	50	22	18	13	0																201	60	43	20	12	10	59
[truncated: 1 more columns]

## Sheet: List of validation gene familie
#Gene_Desc	Gene_Symbol	#primary_group_no	dup_history	dup_member	DMEL	dup_history	dup_member	AGAM	dup_history	dup_member	TCAS	dup_history	dup_member	AMEL
homothorax	hth	1.1		0	41273		0	3290574+1269377		0	641464		0	552079
-	-	1.2		0	00000		0	1269694		0	658681		0	724727
dunce	dnc	2.1		0	31309		0	1272025		0	TC012593		0	724709+411288
Phosphodiesterase 8	Pde8	2.2		0	37741		0	1269950		0	657274		0	408699
Phosphodiesterase 1c	Pde1c	2.3		0	34594		0	1279930		0	NA		0	724389
-	-	2.4		0	00000		0	1276218		0	100141919		0	414021
Phosphodiesterase 9	Pde9	2.5		0	32233		0	1273035		0	658906		0	410379
cAMP-dependent protein kinase 1	Pka-C1	3.1		0	34284		0	1281793		0	656552		0	409791
cAMP-dependent protein kinase 3	Pka-C3	3.2		0	39733		0	1280810		0	661839		0	410228
cAMP-dependent protein kinase 2	Pka-C2	3.3	(1,2)	1	43644		0	1277913		0	655660		0	410670
CG12069	CG12069	3.4		2	43643		0	NA		0	NA		0	NA
baboon	babo	4.1		0	35900		0	1277733		0	659969		0	NW_001253442:81857..81462
saxophone	sax	4.2		0	35731		0	1269509		0	658545		0	725711
thickveins	tkv	4.3		0	33753		0	1271240		0	659260		0	408442
wishful thinking	wit	4.4		0	44096		0	1276252		0	663692		0	413895
punt	put	4.5		0	41772		0	1272354		0	654851		0	412471
Mothers against dpp	Mad	5.1		0	33529		0	1275428	((1,2),3)	1	659927,659654,100141526		0	409301
Smad on X	Smox	5.2		0	31738		0	1279189		0	TC010162		0	412601
Medea	Med	5.3		0	43725		0	1273058		0	660074		0	409321
Daughters against dpp	Dad	5.4		0	42059		0	NA		0	658331		0	413371
Big brother	Bgb	6	(1,2)	1	38198		0	1271945		0	654924		0	410347
Brother	Bro	6		2	38202		0	NA		0	NA		0	NA
glial cells missing	gcm	7	(1,2)	1	34277	(1,2)	1	3291589,3291587		0	663985		0	410334
gcm2	gcm2	7		2	34280		0	NA		0	NA		0	NA
myoblast city	mbc	8.1		0	42817		0	1274463		0	661070		0	GB16498
CG31048	CG31048	8.2		0	43404		0	1274653		0	TC012780		0	725928
APC-like	Apc	9	(1,2)	1	44642		0	NW_045719:10521563..10524443		0	661294+659950+661294		0	552177+724437+552177
Adenomatous polyposis coli tumor suppressor homolog 2	Apc2	9		2	42871		0	NA		0	NA		0	NA
licorne	lic	10.1		0	32257		0	1271952		0	661608		0	GB16739
MAP kinase kinase 4	Mkk4	10.2		0	41020		0	1275042		0	662917		0	410575
hemipterous	hep	10.3		0	32256		0	1281255		0	TC000385		0	413389
Downstream of raf1	Dsor1	10.4		0	31872		0	1282062		0	661995		0	724834+409925
kuzbanian	kuz	11.1		0	34772		0	1275648		0	659820		0	409611
Kuzbanian-like	Kul	11.2		0	43501		0	1273746		0	661872	(1,2)	1	410609,409692
Tace	Tace	11.3		0	43558		0	1273579		0	663540		0	551599
heparan sulfate 2-O-sulfotransferase	Hs2st	12.1		0	44433		0	3291665		0	662441		0	551445
pipe	pip	12.2		0	40104		0	1276729		0	658157		0	411665
domino	dom	13.1		0	45655		0	1276831		0	656538		0	413341
Ino80	Ino80	13.2		0	42314		0	1274851		0	658831		0	410352
fat	ft	14.1		0	33627		0	1278031		0	659713		0	410009
fat2	fat2	14.2		0	40191		0	1268641+1268642+4577735+1268644+4577757		0	662569		0	552859+411157
dachsous	ds	14.3		0	33245		0	3291612+1278050		0	TC007180		0	408767
starry night	stan	14.4		0	36125		0	1275117		0	656624		0	551848
crossveinless	cv	15	((1,2),3)	1	44510		0	1271959		0	100142000		0	409124
twisted gastrulation	tsg	15		2	32160		0	NA		0	NA		0	NA
CG11582	CG11582	15		3	38525		0	NA		0	NA		0	NA
furrowed	fw	16.1		0	32162		0	1270412		0	100141585		0	413543
CG9095	CG9095	16.2		0	32447		0	1272144		0	660816		0	411888
bendless	ben	17	(1,2)	1	32358		0	1274904	(1,2)	1	657832,660986		0	409386
CG3473	CG3473	17		2	34849		0	NA		0	NA		0	NA
Netrin-A	NetA	18.1		0	32398		0	1272041+3289641		0	658458		0	413786+726680+724319
Netrin-B	NetB	18.2		0	32400		0	4576125+1272037		0	NA		0	NA
disco-related	disco-r	19	(1,2)	1	64875		0	1282060		0	660322		0	725257
disconnected	disco	19		2	32579		0	NA		0	NA		0	NA
BarH1	B-H1	20	(1,2)	1	32724		0	5668381		0	657833		0	725590
BarH2	B-H2	20		2	32723		0	NA		0	NA		0	NA
domeless	dome	21	(1,2)	1	32976		0	1279513		0	100142217		0	GB12159
CG14225	CG14225	21		2	32975		0	NA		0	NA		0	NA
Merlin	Mer	22.1		0	32979		0	1272693		0	660939		0	GB15815
Moesin	Moe	22.2		0	31816		0	4575958		0	660394		0	412799
dawdle	daw	23.1		0	33474		0	NA		0	658911		0	726478
Activin-beta	Actbeta	23.2		0	43826		0	3289663		0	655286		0	727335
alpha Spectrin	alpha-Spec	24.1		0	38231		0	1277275		0	662567		0	551291
beta Spectrin	beta-Spec	24.2		0	32746		0	1271052		0	661354		0	411744
karst	kst	24.3		0	38418		0	1274583		0	658185		0	413332
alpha actinin	Actn	24.4		0	31166		0	1281675		0	661042		0	725782
short stop	shot	24.5		0	36542		0	1278301		0	662585		0	411644+GB17469
echinoid	ed	25.1		0	33619	(1,2)	1	1279606,3292140+1279605		0	TC012257		0	413423
friend of echinoid	fred	25.2		0	33613		0	NA		0	NA		0	NA
spalt major	salm	26	(1,2)	1	34569		0	1271368		0	652943		0	551803
spalt-related	salr	26		2	34568		0	NA		0	NA		0	NA
beta[nu] integrin	betaInt-nu	27.1		0	35368		0	1272405		0	660948		0	GB14487
myospheroid	mys	27.2		0	44885		0	1279656		0	657674		0	406097
engrailed	en	28.1		0	36240		0	1277926		0	661645		0	725151
invected	inv	28.2		0	36239		0	3291638		0	641551		0	GB11694
Imitation SWI	Iswi	29.1		0	36390		0	1272459		0	660820		0	412742
brahma	brm	29.2		0	39744		0	1272575		0	655742		0	551881
bric a brac 1	bab1	30	(1,2)	1	38116		0	1276686		0	100142273+100141653		0	725278+725189
bab2	bab2	30		2	44254		0	NA		0	NA		0	NA
scratch	scrt	31.1		0	38469		0	1270274		0	658241		0	725190
CG12605	CG12605	31.2		0	38468		0	1270271		0	100141988		0	410723
CG17181	CG17181	31.3		0	38072		0	1276091		0	659972		0	724705
eyegone	eyg	32	(1,2)	1	39419		0	1278279		0	661318		0	410818
twin of eyg	toe	32		2	39418		0	NA		0	NA		0	NA
araucan	ara	33.1	(1,2)	1	39439		0	1275836		0	652944		0	412840
caupolican	caup	33.2		2	39440		0	NA		0	NA		0	NA
mirror	mirr	33.3		0	39441		0	1275837		0	660345		0	412839
tartan	trn	34.1	(1,2)	1	39491		0	1278321		0	660991		0	413237
capricious	caps	34.2		2	39493		0	NA		0	NA		0	NA
Fish-lips	Fili	34.3		0	5740472	(1,2)	1	1270695,1270698		0	655571		0	724651
epsin-like	epsin-like	35.1		0	42632		0	1274651		0	662353		0	413132
liquid facets	lqf	35.2		0	38846		0	1269786		0	660738		0	413680
Glued	Gl	36	(1,2)	1	39536		0	1274028		0	661119		0	413931
CG9279	CG9279	36		2	40124		0	NA		0	NA		0	NA
Sox21a	Sox21a	37.1		0	39567		0	1271029		0	660601		0	726150
Sox21b	Sox21b	37.2		0	39569		0	4577582		0	660661		0	726180
Dichaete	D	37.3		0	39570		0	5667882	(1,2)	1	660717,660774		0	726202
SoxNeuro	SoxN	37.4		0	44275		0	1279377		0	663351		0	408411
TGF-beta activated kinase 1	Tak1	38	((1,2),3)	1	39659		0	NZ_AAAB02008859:1523456...1522587		0	656961		0	413809
Tak1-like 2	Takl2	38		2	42692		0	NA		0	NA		0	NA
Tak1-like 1	Takl1	38		3	318725		0	NA		0	NA		0	NA
Chitin synthase 2	CS-2	39.1		0	40442		0	1281963		0	641505		0	725284
krotzkopf verkehrt	kkv	39.2		0	45884		0	1281426		0	641504		0	412215+411645
kinase suppressor of ras	ksr	40.1		0	40660		0	1281691		0	661985		0	409498
pole hole	phl	40.2		0	31221		0	1278538		0	655334		0	413448
C-terminal Binding Protein	CtBP	41.1		0	41602		0	1269481		0	660954		0	409158
CG6287	CG6287	41.2		0	34554		0	1279816		0	663218		0	725967
slalom	sll	42.1		0	42115		0	1273395		0	659051		0	412435
medial glomeruli	meigo	42.2		0	42510		0	1281727		0	663122		0	NW_001258880:55767..55387
supernumerary limbs	slmb	43.1		0	42504		0	1281180		0	664308		0	551517
archipelago	ago	43.2		0	38516		0	1276064		0	655954		0	413081
ladybird early	lbe	44	(1,2)	1	42542		0	1274347		0	663883		0	724281
ladybird late	lbl	44		2	42541		0	NA		0	NA		0	NA
Insulin-like receptor	InR	45.1		0	42549		0	1280455	(1,2)	1	661524,664271	(1,2)	1	725790+725827,411297
CG3837	CG3837	45.2		0	41809		0	NA		0	NA		0	NA
Aly	Aly	46	(1,2)	1	44029		0	1270326		0	660256		0	725396
ref2	ref2	46		2	34667		0	NA		0	NA		0	NA
oo18 RNA-binding protein	orb	47.1		0	42752		0	4576976		0	661956		0	411907
orb2	orb2	47.2		0	39019		0	NZ_AAAB02008799:303140..303826		0	657803		0	724704
lethal (3) malignant brain tumor	l(3)mbt	48.1		0	43288		0	1270254		0	656299		0	408319
Sex comb on midleg	Scm	48.2		0	41168		0	1269174		0	654967		0	726007
Scm-related gene containing four mbt domains	Sfmbt	48.3		0	34709		0	1279624		0	656179		0	413754
CG33960	CG33960	49.1		0	246538		0	1277222		0	NA		0	NA
Sema-2a	Sema-2a	49.2		0	36846		0	1277221		0	656741		0	408896
Sema-1b	Sema-1b	49.3		0	37007		0	1276412		0	656016		0	NW_001253290:160689..160841
Sema-1a	Sema-1a	49.4		0	34192		0	1275507		0	660780		0	410686
Semaphorin-5c	Sema-5c	49.5		0	37066		0	1273536		0	655313		0	410589
eyeless	ey	50.1		0	43812		0	1272212		0	664444		0	724238
twin of eyeless	toy	50.2		0	43833		0	1272206		0	TC007409		0	411174
varicose	vari	51.1		0	35343		0	1277662		0	661679		0	408359
Calcium/calmodulin-dependent protein kinase	Caki	51.2		0	42567		0	4577273		0	656749		0	411347
skiff	skf	51.3		0	36176		0	1279654		0	100142540		0	408598
stardust	sdt	51.4		0	44861		0	1273257		0	663614		0	409904
discs large 1	dlg1	51.5		0	32083		0	1272003		0	663521		0	GB30138
CG11811	CG11811	51.6		0	39213		0	1270820		0	659919		0	552023
female sterile (1) Nasrat	fs(1)N	52.1		0	45973		0	1269190		0	TC007081		0	GB18228
female sterile (1) M3	fs(1)M3	52.2		0	45994		0	NA		0	TC004775		0	NA
CG1582	CG1582	53.1	(1,2)	1	32021		0	1269336		0	657645		0	725983
CG8915	CG8915	53.2		2	32715		0	NA		0	NA		0	NA
CG9323	CG9323	53.3		0	35339		0	1277741		0	664152		0	411492
maleless	mle	53.4		0	35523		0	1277182		0	662250		0	413074
okra	okr	54.1		0	33507		0	3291801		0	656357		0	409447
-	-	54.2		0	00000		0	1270139		0	NA		0	552169
pelle	pll	55.1		0	43283		0	1272997		0	654877		0	551608
-	-	55.2		0	00000		0	4577000		0	TC011895		0	NA
sevenless	sev	56.1		0	32039		0	1272261		0	TC001239		0	410671
Alk	Alk	56.2		0	53425		0	1280600		0	657445		0	408718
fusilli	fus	57.1		0	44095		0	1280918		0	659398		0	413638
glorund	glo	57.2		0	41431		0	1273075		0	660514		0	GB30368
glass bottom boat	gbb	58.1		0	37778	(1,2)	1	1277335,1280735	(1,2)	1	660478,TC014018		0	410776
screw	scw	58.2		0	46000		0	NA		0	NA		0	NA
decapentaplegic	dpp	58.3		0	33432		0	1277962		0	654513		0	727101
gluon	glu	59.1		0	35001		0	1278132		0	656381		0	413418
SMC1	SMC1	59.2		0	42853		0	1273015		0	656031	(1,2)	1	411589,GB12519
SMC2	SMC2	59.3		0	36653		0	1278267		0	662857		0	412832
heartless	htl	60.1	(1,2)	1	42160		0	1273778		0	659434		0	413200
breathless	btl	60.2		2	39564		0	NA		0	NA		0	NA
Cad96Ca	Cad96Ca	60.3		0	43026		0	1280989		0	659961		0	409061
Ret oncogene	Ret	60.4		0	43875		0	1279866		0	657748		0	412667
ocelliless	oc	61.1		0	31802		0	1272051		0	641604		0	551357
-	-	61.2		0	00000		0	NA		0	641553		0	410684
grainy head	grh	62.1		0	37038		0	1276249		0	660755		0	411079
gemini	gem	62.2		0	36064		0	1270039		0	663386		0	725290
giant	gt	63	(1,2)	1	31227		0	1281243		0	641612		0	725191
CG4575	CG4575	63		2	31637		0	NA		0	NA		0	NA
Lim1	Lim1	64.1		0	31813		0	1270792		0	657972		0	GB12408
Lim3	Lim3	64.2		0	35184		0	1280042		0	662120		0	410658
apterous	ap	64.3		0	35509		0	1279943+3291866		0	658656		0	409095
-	-	64.4		0	00000		0	1279942		0	658719		0	GB30111
tailup	tup	64.5		0	35147		0	1279631		0	662583		0	GB12465
Arrowhead	Awh	64.6		0	38451	((1,2),3)	1	1277135,1277139,4576611		0	659841	(1,2)	1	725532,725574
CG4328	CG4328	64.7		0	39405		0	1274816		0	655506		0	NA
CG32105	CG32105	64.8		0	39406		0	3289904		0	655586		0	724778
CG7097	CG7097	65.1		0	37203		0	1271122		0	655348		0	413334
misshapen	msn	65.2		0	44030		0	1276946		0	656940		0	413504
Sterile20-like kinase	slik	65.3		0	37893		0	1275286		0	663345		0	408519
hippo	hpo	65.4		0	37247		0	1276715		0	658552		0	410208
Germinal centre kinase III	GckIII	65.5		0	42064		0	1279381		0	657573		0	410427
Regulator of G-protein signalling 7	RSG7	66.1		0	32674	(1,2)	1	1271449,1277215		0	655987		0	409912
CG42450	CG42450	66.2		0	32874		0	1272033		0	656292		0	GB17279
locomotion defects	loco	66.3		0	42672		0	1273552		0	660124		0	726548
CG5036	CG5036	66.4		0	37037		0	1269979		0	661591		0	726284
arrest	aret	67.1	(1,2)	1	34648		0	1271433		0	660275		0	724376+409780
bruno-2	bru-2	67.2		2	250811		0	NA		0	NA		0	NA
bruno-3	bru-3	67.3		0	39527		0	1275761		0	659679		0	410353
smell impaired 35A	smi35A	68.1		0	34831		0	1278112		0	661419		0	412917
Dyrk3	Dyrk3	68.2		0	3885567		0	1277739		0	TC013573		0	411871+725430
minibrain	mnb	68.3		0	32771		0	1281364		0	660870		0	409111
CG17090	CG17090	68.4		0	38070		0	1269819		0	661500		0	408664
CG7028	CG7028	68.5		0	38032		0	1275132		0	657605		0	NA
Darkener of apricot	Doa	68.6		0	43415	(1,2)	1	1277360,1274337		0	659421		0	411812
nudel	ndl	69.1		0	38738		0	1269883		0	663827		0	551514
Corin	Corin	69.2		0	35691		0	1277217		0	661781		0	725241
-	-	69.3		0	00000		0	NA		0	TC004654		0	412101
nebbish	neb	70.1		0	35293		0	1277915		0	662444		0	412638
Kinesin-73	Khc-73	70.2		0	36718		0	1269637		0	661047		0	GB16936
unc-104	unc-104	70.3		0	36876		0	1275256		0	662651		0	413837
Kinesin-like protein at 98A	Klp98A	70.4		0	43310		0	1278752		0	662709		0	413170
p38b	p38b	71.1	((1,2),3)	1	34780		0	NZ_AAAB02008986:3886060..3886389		0	TC013594		0	411915
Mpk2	Mpk2	71.2		2	42866		0	NA		0	NA		0	NA
p38c	p38c	71.3		3	2768679		0	NA		0	NA		0	NA
basket	bsk	71.4		0	44801	(1,2)	1	1271440,1269260		0	663836		0	409286
rolled	rl	71.5		0	3354888		0	1280167		0	655225		0	409523
nemo	nmo	71.6		0	38890		0	1276565		0	659674		0	410956
kekkon-1	kek1	72.1		0	34688		0	1280094		0	662007		0	552187
kekkon-2	kek2	72.2		0	34582		0	1280097	(1,2)	1	662117,662080		0	725924
kekkon-3	kek3	72.3		0	34912		0	NA		0	658035		0	NA
kek6	kek6	72.4		0	43729		0	1271792		0	662901		0	413384
kekkon5	kek5	72.5	(1,2)	1	32930		0	1273631		0	664293		0	411158
kekkon4	kek4	72.6		2	34718		0	NA		0	NA		0	NA
CG34325	CG34325	73.1	(((1,2),3),4)	1	32656		0	1272345		0	659357		0	NA
CG31624	CG31624	73.2		2	35393		0	NA		0	NA		0	NA
CG31988	CG31988	73.3		3	326182		0	NA		0	NA		0	NA
CG30178	CG30178	73.4		4	246501		0	NA		0	NA		0	NA
Paxillin	Pax	73.5		0	35215		0	1277441		0	658324		0	551919
Ets at 65A	Ets65A	74.1		0	38700		0	1276424		0	661753		0	551084
Ets at 21C	Ets21C	74.2		0	33229		0	1271416		0	663364		0	725629
Ets at 97D	Ets97D	74.3		0	43236		0	1274484		0	658879		0	411268
pointed	pnt	74.4		0	42757		0	1275912		0	659984		0	726090+412916
Ets96B	Ets96B	74.5		0	42952		0	3291985		0	660644		0	726458
polo	polo	75.1		0	40232		0	1274084		0	660822		0	413261
SAK	SAK	75.2		0	40384		0	1268576		0	663303		0	550739
kin of irre	kirre	76.1		0	31292		0	1272049		0	664188		0	410853
roughest	rst	76.2		0	31290		0	1272050		0	NA		0	NA
retained	retn	77.1		0	45976		0	5667193		0	657345		0	725697
osa	osa	77.2		0	42130		0	1281332		0	100141527		0	412046
Keren	Krn	78.1		0	326198		0	1279733		0	100141824		0	GB19294
spitz	spi	78.2		0	35253		0	4397777		0	NA		0	NA
lethal (2) tumorous imaginal discs	l(2)tid	79.1		0	48844		0	1269663		0	662253		0	411359
CG7387	CG7387	79.2		0	38915		0	5667045		0	NA		0	NA
torp4a	torp4a	80.1		0	31399		0	1271363		0	662597		0	724985
-	-	80.2		0	00000		0	NA		0	662764		0	GB10557
tre oncogene-related protein	RN-tre	81.1		0	36554	(1,2)	1	1275017,1271558		0	661295		0	552473
whacked	wkd	81.2		0	41390		0	1281172		0	661976		0	551429
CG7112	CG7112	81.3		0	38945		0	1269845		0	655914		0	410970
CG11727	CG11727	81.4		0	32088		0	1273609		0	655844		0	GB14781
Myb oncogene-like	Myb	82.1		0	32543		0	1277801		0	664494		0	409733
CG6905	CG6905	82.2		0	38062		0	1273009		0	658182		0	552527
Dorsocross1	Doc1	83.1	((1,2),3)	1	39039	(1,2)	1	1276562,1276561		0	654492		0	410885
Dorsocross2	Doc2	83.2		2	39038		0	NA		0	NA		0	NA
Dorsocross3	Doc3	83.3		3	39036		0	NA		0	NA		0	NA
bifid	bi	83.4		0	31379		0	1280928+3291411		0	661159		0	726842
optomotor-blind-related-gene-1	org-1	83.5		0	31778		0	1281834		0	660602		0	552311
H15	H15	83.6		0	33769	((1,2),3)	1	1275432,1275431,1275417+1275418+4578308	(1,2)	1	661420,661373	(1,2)	1	411133,726654+726635
midline	mid	83.7		0	33770		0	NA		0	NA		0	NA
brachyenteron	byn	83.8		0	39349		0	1280741		0	652935		0	412976
buttonhead	btd	84.1		0	31912		0	NA		0	658531		0	724156
Sp1	Sp1	84.2		0	31913		0	1272454		0	641549		0	552146
CG5669	CG5669	84.3		0	42882		0	1274581		0	660965		0	551928
cabut	cbt	84.4		0	33224		0	1279306		0	660041		0	410326
tout-velu	ttv	85.1		0	36614		0	1272657		0	657388		0	408293
Ext2	Ext2	85.2		0	3772101		0	1272189		0	659287		0	726216
brother of tout-velu	botv	85.3		0	37198		0	1281488		0	663383		0	413640
Arrestin 1	Arr1	86.1		0	35078		0	1279554		0	657618		0	412907
Arrestin 2	Arr2	86.2		0	38993		0	1276917		0	661335		0	550791
kurtz	krz	86.3		0	53554		0	1278336		0	661293		0	409006
CG32683	CG32683	86.4		0	31970		0	1281035		0	661661		0	551043
Nuclear transport factor-2	Ntf-2	87.1		0	33078		0	1270081		0	662356		0	409406
Nuclear transport factor-2-related	Ntf-2r	87.2		0	35101		0	1271742		0	NA		0	NA
nubbin	nub	88.1	(1,2)	1	34669		0	1271410		0	656845		0	727092
POU domain protein 2	pdm2	88.2		2	34673		0	NA		0	NA		0	NA
ventral veins lacking	vvl	88.3		0	38752		0	1276544		0	656764		0	410203
abnormal chemosensory jump 6	acj6	88.4		0	47080		0	1269382		0	661038		0	410657
pou domain motif 3	pdm3	88.5		0	35813		0	1280360		0	657375		0	408435
sugarbabe	sug	89.1		0	36424		0	1270324		0	658487		0	GB12583
cubitus interruptus	ci	89.2		0	43767		0	1275892		0	658653		0	551746
lame duck	lmd	89.3		0	42717		0	1269472		0	TC030749		0	GB30371
odd paired	opa	89.4		0	40605		0	1281886		0	656812		0	GB12480
CG40045	CG40045	90.1	(1,2)	1	3355079		0	1269310		0	659653		0	GB13798
CG9602	CG9602	90.2		2	41682		0	NA		0	NA		0	NA
courtless	crl	90.3		0	44054		0	1269385		0	662505		0	552779
CG7656	CG7656	90.4		0	39691		0	1275526		0	658054		0	410838
par-1	par-1	91.1	((1,2),3)	1	2768852		0	3291504+1280604		0	656926		0	410717
KP78a	KP78a	91.2		2	41362		0	NA		0	NA		0	NA
KP78b	KP78b	91.3		3	41361		0	NA		0	NA		0	NA
CG4290	CG4290	91.4		0	31170		0	NZ_AAAB02008859:513799..514692		0	658197		0	413736
CG15072	CG15072	91.5		0	37152		0	1277022		0	100142375		0	412260
pleiohomeotic	pho	92	(1,2)	1	43819		0	NZ_AAAB02008835:415460..415092		0	661508		0	GB11924
pleiohomeotic like	phol	92		2	39095		0	NA		0	NA		0	NA
plexin A	plexA	93.1		0	43832		0	1272211		0	659123		0	410785
plexin B	plexB	93.2		0	43766		0	1270788		0	TC004144		0	412274
zerknullt-related	zen2	94	((1,2),3)	1	40827		0	4576785	(1,2)	1	641533,652932		0	724297
zerknullt	zen	94		2	40828		0	NA		0	NA		0	NA
bicoid	bcd	94		3	40830		0	NA		0	NA		0	NA
forkhead domain 96Ca	fd96Ca	95.1	(1,2)	1	43010		0	1273500	(1,2)	1	656430,656599		0	724979
forkhead domain 96Cb	fd96Cb	95.2		2	43011		0	NA		0	NA		0	NA
fork head	fkh	95.3		0	43383		0	1281503		0	641542		0	411296
atonal	ato	96.1		0	40975	(1,2)	1	1281435,1281434		0	659297		0	725392
cousin of atonal	cato	96.2		0	36813		0	1278137		0	663089		0	GB13897
absent MD neurons and olfactory sensilla	amos	96.3		0	35110		0	1278135		0	663144		0	725172
senseless	sens	97.1		0	45328		0	1271025		0	663289		0	GB16131
senseless-2	sens-2	97.2		0	33957		0	1279085		0	659757		0	GB11844
PDGF- and VEGF-related factor 3	Pvf3	98.1	(1,2)	1	33995		0	3291994		0	659516		0	GB12742
PDGF- and VEGF-related factor 2	Pvf2	98.2		2	33994		0	NA		0	NA		0	NA
PDGF- and VEGF-related factor 1	Pvf1	98.3		0	32876		0	1271647	(1,2)	1	100141674,100141670		0	408666
Retinoblastoma-family protein	Rbf	99	(1,2)	1	31027		0	1277084		0	660494		0	411627
Retinoblastoma-family protein 2	Rbf2	99		2	41941		0	NA		0	NA		0	NA
aurora	aur	100.1		0	41446	((1,2),3)	1	3292274,3292650,NZ_AAAB02008987:5699523..5700173		0	656727		0	412271
IplI-aurora-like kinase	ial	100.2		0	34504		0	1278103		0	TC001943		0	552733
Spz3	Spz3	101.1		0	34077		0	1277619		0	659259		0	726201
CG14928	CG14928	101.2		0	34572		0	1278089		0	100142309		0	551942
TBP-associated factor 5	Taf5	102.1	(1,2)	1	47900		0	1280962		0	662192		0	724502
cannonball	can	102.2		2	45432		0	NA		0	NA		0	NA
will decrease acetylation	wda	102.3		0	42750		0	1274182		0	TC009210		0	NA
TBP-associated factor 6	Taf6	103	(1,2)	1	40134		0	1274098	(1,2)	1	100142604,100141911		0	409735
meiosis I arrest	mia	103		2	40667		0	NA		0	NA		0	NA
groucho	gro	104.1		0	43162		0	1274122		0	656496		0	408894
-	-	104.2		0	00000		0	1278620		0	655664	(1,2)	1	408890,411175
beat-IIIc	beat-IIIc	105.1		0	35037		0	1278024		0	662150	(1,2)	1	412835,GB18939
beat-IIIa	beat-IIIa	105.2		0	35035		0	1278023		0	NA		0	NA
beat-IIIb	beat-IIIb	105.3		0	35031		0	1278025		0	NA		0	NA
Trehalose-6-phosphate synthase 1	Tps1	106.1		0	33642		0	1277752		0	659356		0	408867
CG5171	CG5171	106.2	(1,2)	1	34016		0	1277754		0	NA		0	NA
CG5177	CG5177	106.3		2	34017		0	NA		0	NA		0	NA
trachealess	trh	107.1		0	38065		0	1272221		0	655476		0	408389
single-minded	sim	107.2		0	41612	(1,2)	1	1272364,1279488		0	656297		0	410669
similar	sima	107.3		0	43580		0	1273024		0	655772		0	408852
vasa	vas	108.1		0	34884		0	1275440		0	641597		0	410692
belle	bel	108.2		0	45826		0	1272904		0	TC013328		0	408276
Zwischenferment	Zw	109	(1,2)	1	32974		0	1272457		0	662934		0	725325
CG7140	CG7140	109		2	40445		0	NA		0	NA		0	NA
stem cell tumor	stet	110.1	((1,2),3)	1	38169		0	1274741		0	657740		0	726936
rhomboid	rho	110.2		2	38168		0	NA		0	NA		0	NA
roughoid	ru	110.3		3	44856		0	NA		0	NA		0	NA
rhomboid-4	rho-4	110.4		0	32109		0	1278488	(1,2)	1	663099,661276		0	412319
rhomboid-6	rho-6	110.5		0	34640		0	1269249		0	662659		0	725894
bicaudal	bic	111	(1,2)	1	45827		0	1277199		0	656401		0	726620
CG11835	CG11835	111		2	33232		0	NA		0	NA		0	NA
Calmodulin	Cam	112.1		0	36329		0	1271007		0	660864		0	551859
Androcam	And	112.2		0	44913		0	1277208		0	659938		0	552209
cdc2	cdc2	113.1		0	34411		0	1269259		0	656189		0	409590
cdc2c	cdc2c	113.2		0	42453		0	3291042		0	NA		0	409959
CG33980	CG33980	114	(1,2)	1	31469		0	1270784		0	655933		0	411315
CG4136	CG4136	114		2	31470		0	NA		0	NA		0	NA
tiptop	tio	115	(1,2)	1	44272		0	1279986		0	654846		0	726581
teashirt	tsh	115		2	35430		0	NA		0	NA		0	NA
trithorax	trx	116.1		0	41737		0	1273224		0	658843		0	408716
trithorax-related	trr	116.2		0	31149		0	1270733		0	TC000606		0	409844
CG40351	CG40351	116.3		0	3354971		0	1269315		0	657811		0	411985
Tenascin major	Ten-m	117.1		0	40464		0	1269465		0	664026		0	410739
Tenascin accessory	Ten-a	117.2		0	32183		0	1271779		0	654865		0	411155
leak	lea	118.1		0	44522		0	1279664		0	NA		0	NA
robo3	robo3	118.2		0	33314		0	3292147		0	658818		0	NA
roundabout	robo	118.3		0	37603	((1,2),3)	1	1270988,1270986,1280467		0	655427		0	726909+412739
pavarotti	pav	119.1		0	38515		0	1269528	(1,2)	1	655279,658970	(1,2)	1	552508,724731
subito	sub	119.2		0	44870		0	1270110		0	657649	(1,2)	1	551711,411139
lozenge	lz	120.1		0	31883		0	1273456		0	660060		0	410537
CG34145	CG34145	120.2		0	4379817		0	NZ_AAAB02008921:76259..75870		0	657431		0	410535
CG42267	CG42267	120.3		0	33051		0	NA		0	657356		0	410534
runt	run	120.4		0	33059		0	5666824		0	657742		0	726124
knirps-like	knrl	121.1	(1,2)	1	40285		0	4577884		0	656920	(1,2)	1	724765,724640
knirps	kni	121.2		2	40287		0	NA		0	NA		0	NA
eagle	eg	121.3		0	40428		0	NZ_AAAB02008849:1042990..1027147		0	652949		0	412475
knickkopf	knk	122.1		0	47137		0	1274646		0	655087		0	410606
CG34355	CG34355	122.2		0	42820		0	1269475		0	661990		0	410021
CG14681	CG14681	122.3		0	3772559		0	1274177		0	657143		0	GB19587
Kinesin-like protein at 3A	Klp3A	123.1		0	31240		0	4576148		0	656476		0	412131
Klp31E	Klp31E	123.2		0	34422		0	1278143		0	661825		0	411068
alpha Catenin	alpha-Cat	124.1		0	40517		0	1272798	(1,2)	1	658703,662789		0	552850
alpha-catenin related	alpha-catenin-related	124.2		0	49713		0	1270830		0	658111		0	552017
Vinculin	Vinc	124.3		0	31201		0	1269702		0	659554		0	GB12814
gooseberry	gsb	125.1		0	38005		0	1272681		0	663057		0	411373
gooseberry-neuro	gsb-n	125.2		0	38004		0	1272680		0	663027		0	411374
paired	prd	125.3		0	34629		0	NA		0	655066		0	GB15469
frizzled	fz	126.1		0	45307		0	3291305+1278320+1278319		0	663095		0	551124
frizzled 2	fz2	126.2		0	40090		0	1272596		0	656499		0	413820
frizzled 3	fz3	126.3		0	31023		0	1272095		0	NA		0	NA
frizzled 4	fz4	126.4		0	31659		0	1279837		0	655955		0	NA
four wheel drive	fwd	127.1		0	45374		0	1269716		0	661577		0	408373
CG10260	CG10260	127.2		0	31247		0	4577816		0	658290		0	551182
fat facets	faf	128.1		0	43749		0	1279518		0	661487		0	411981
CG5794	CG5794	128.2		0	42935		0	1274308		0	TC009817		0	410109
Sprouty-related protein with EVH-1 domain	Spred	129.1		0	36643		0	1280587		0	656393		0	412008
enabled	ena	129.2		0	37201		0	4577692		0	658784		0	727235
sprouty	sty	129.3		0	38424		0	5666840		0	661922		0	725117
dorsal	dl	130.1		0	35047		0	1271394	(1,2)	1	641547,663677	(1,2)	1	406086,411712
Dorsal-related immunity factor	Dif	130.2		0	35045		0	NA		0	NA		0	NA
Relish	Rel	130.3		0	41087		0	1270310		0	659499		0	552247
cut	ct	131.1		0	44540		0	3290433		0	659250		0	551460
onecut	onecut	131.2		0	45816		0	4576053		0	100142225		0	552619
division abnormally delayed	dally	132.1		0	39013		0	1276466		0	656854		0	552545
dally-like	dlp	132.2		0	39596		0	1274218		0	663819		0	552340
distal antenna	dan	133	((1,2),3)	1	43023		0	4576855		0	657610		0	GB13750
distal antenna-related	danr	133		2	43020		0	NA		0	NA		0	NA
CG30401	CG30401	133		3	246593		0	NA		0	NA		0	NA
arrow	arr	134.1		0	44279		0	1280870		0	664383		0	724394+551021
CG8909	CG8909	134.2		0	32552		0	1272241		0	663741		0	NA
Megalin	mgl	134.3		0	8674055		0	1271927		0	TC004414+655980		0	GB12775
Rae1	Rae1	135.1	(1,2)	1	37467		0	1280339		0	664096		0	409169
CG12782	CG12782	135.2		2	37685		0	NA		0	NA		0	NA
Bub3	Bub3	135.3		0	43490		0	1275274		0	658849		0	410050
CG5708	CG5708	136.1		0	34361		0	3291599+1278120		0	661046		0	413125
Beadex	Bx	136.2		0	32846		0	1272320		0	663863		0	724851
-	-	136.3		0	00000		0	1272655		0	664264		0	410866
mind bomb 2	mib2	137.1		0	35170		0	1279818		0	TC013531		0	409303
mind bomb 1	mib1	137.2		0	39750		0	1280737		0	663742		0	410652
escargot	esg	138	((1,2),3)	1	34903		0	1277710		0	654928		0	410464
worniu	wor	138		2	34906		0	NA		0	NA		0	NA
snail	sna	138		3	34908		0	NA		0	NA		0	NA
achaete	ac	139.1	((1,2),3)	1	30981		0	1277392		0	652954		0	724458
scute	sc	139.2		2	30982		0	NA		0	NA		0	NA
lethal of scute	l(1)sc	139.3		3	30983		0	NA		0	NA		0	NA
asense	ase	139.4		0	30985		0	5666740		0	652936		0	NW_001252982:178419..178583
Muscle protein 20	Mp20	140.1		0	36468		0	1280390		0	663877		0	408972
-	-	140.2		0	00000		0	NZ_AAAB02008847:2382109..2381993		0	661196		0	551504
CG5023	CG5023	140.3		0	42400		0	1272338		0	659621		0	408532
Chd64	Chd64	140.4		0	38490		0	1281864		0	663982		0	408572
Grunge	Gug	141.1		0	46156		0	1277259		0	656772		0	409084
MTA1-like	MTA1-like	141.2		0	40693		0	1274488		0	664398		0	413318
lethal (2) giant larvae	l(2)gl	142.1		0	33156		0	1274630		0	655235		0	409348
tomosyn	tomosyn	142.2		0	32217		0	1272267		0	657003		0	408267
pannier	pnr	143.1		0	44849		0	1269326		0	661820		0	725350
grain	grn	143.2		0	40962		0	3290975		0	660745		0	725177
serpent	srp	143.3		0	41944		0	NZ_AAAB02008799:969826..969978		0	661909		0	725422
GATAd	GATAd	143.4		0	34395		0	NZ_AAAB02008984:2756351..2756181		0	100142041		0	724420
GATAe	GATAe	143.5		0	41945		0	4577427		0	TC010406		0	725389
shaggy	sgg	144	(1,2)	1	31248		0	1274587		0	664299		0	408976
gasket	gskt	144		2	318552		0	NA		0	NA		0	NA
sloppy paired 2	slp2	145	(1,2)	1	33608		0	1280105	(1,2)	1	662438,662507		0	724740
sloppy paired 1	slp1	145		2	33607		0	NA		0	NA		0	NA
sine oculis	so	146.1		0	35662		0	1280941		0	660875		0	413366
Optix	Optix	146.2		0	44108		0	3290919		0	664012		0	551364
Six4	Six4	146.3		0	40297	(1,2)	1	1270857,4577543		0	657176		0	724796
seven up	svp	147.1		0	41491		0	1273419		0	655884		0	408872
Hepatocyte nuclear factor 4	Hnf4	147.2		0	44544		0	1269402		0	657032		0	725032
tailless	tll	147.3		0	43656		0	1277430		0	641541		0	725327
dissatisfaction	dsf	147.4		0	33823		0	1278936		0	664148		0	551876
Hormone receptor 51	Hr51	147.5		0	36702		0	1279307		0	658951		0	413558
ultraspiracle	usp	147.6		0	31165		0	1281377		0	661207		0	409227
Toll-7	Toll-7	148.1	(1,2)	1	37272		0	1280374		0	661135		0	410902
18 wheeler	18w	148.2		2	37277		0	NA		0	NA		0	NA
Toll-6	Toll-6	148.3		0	39663		0	1280328		0	660697		0	410229
Tollo	Tollo	148.4		0	44497		0	3291574		0	660808		0	XP_393713.2
sister of odd and bowl	sob	149.1		0	33581		0	1277976		0	660734		0	725003
brother of odd with entrails limited	bowl	149.2		0	33602		0	3291680		0	660842		0	410399
odd skipped	odd	149.3		0	33583		0	1268420		0	660789		0	725053
no ocelli	noc	150.1		0	34847		0	1279646		0	663794		0	408265
elbow B	elB	150.2		0	34844		0	NZ_AAAB02008980:15039515..15039273		0	663817		0	409921
hairy	h	151.1		0	38995		0	1277284		0	660626		0	410468
deadpan	dpn	151.2		0	35800		0	1280359		0	656046		0	724914
similar to Deadpan	Side	151.3		0	35168		0	NZ_AAAB02008984:706767..705961		0	664077		0	725331
brain tumor	brat	152.1		0	35197		0	1279484		0	658934		0	412853
mei-P26	mei-P26	152.2		0	45775		0	1273621		0	662730		0	GB18936
Rac1	Rac1	153.1	(1,2)	1	38146		0	1276139		0	656798		0	551554
Rac2	Rac2	153.2		2	38831		0	NA		0	NA		0	NA
Cdc42	Cdc42	153.3		0	32981		0	1273521		0	657937		0	411134
Mig-2-like	Mtl	153.4		0	43319		0	1281597		0	656493		0	552138
Rho1	Rho1	153.5		0	36775		0	1274843	((1,2),3)	1	663337,663316,661700		0	409910
rho-like	RhoL	153.6		0	41136		0	1273768		0	660912		0	552419
-	-	153.7		0	00000		0	1276933	(1,2)	1	660921,660977		0	727132
CG34104	CG34104	153.8		0	31945		0	1278757		0	659479		0	412309
RhoBTB	RhoBTB	153.9		0	40249		0	1277081		0	661174		0	413034
draper	drpr	154		0	38218		0	1269892		0	663845		0	552479
spire	spir	155		0	45931		0	5668153+3291649+1277851		0	660878		0	727246+409421
exuperantia	exu	156		0	37345	(1,2)	1	1269817,5667105		0	663640		0	551582
faint sausage	fas	157		0	36521	(1,2)	1	1270833,5668029		0	TC005058		0	724195
fringe connection	frc	158		0	39943		0	4576706		0	661141		0	411559
Fasciclin 3	Fas3	159		0	35097	((1,2),3)	1	1271139,1271142,1271141		0	657272		0	724243
Fimbrin	Fim	160		0	32721		0	1270874		0	658638		0	408694
Farnesyl pyrophosphate synthase	Fpps	161		0	36209		0	1269998		0	661272	((((((1,2),3),4),5),6),7)	1	726969,412771,551189,551910,726859,727067+727618,GB10756
grapes	grp	162		0	34993		0	1277834		0	658323		0	413964
Jun-related antigen	Jra	163		0	36057		0	1276998		0	663937		0	726289
argos	argos	164		0	39833		0	NA		0	659460		0	GB13926
armadillo	arm	165		0	31151		0	1270538	(1,2)	1	TC012388,660679		0	408399
longitudinals lacking	lola	166		0	44548		0	1274953		0	659496		0	725336
lesswright	lwr	167		0	33226	((1,2),3)	1	1270852,1280569,1271745		0	656284		0	551283
Myocyte enhancing factor 2	Mef2	168		0	36032		0	3290401		0	660448		0	413946
mini spindles	msps	169		0	41952		0	1270767		0	659068		0	409359
missing oocyte	mio	170		0	33399		0	1277964		0	657122		0	726771
Signal-transducer and activator of transcription protein at 92E	Stat92E	171		0	42428	(1,2)	1	1272172,1272625		0	657965		0	413742
Suppressor of Hairless	Su(H)	172		0	34881		0	1279906		0	663984		0	413870
TBP-associated factor 7	Taf7	173		0	40934		0	1275232	(1,2)	1	656924,660666		0	552563
transformer 2	tra2	174		0	36619		0	1270267		0	656964		0	725195
staufen	stau	175		0	37065		0	1269745	(1,2)	1	657623,664406		0	GB13840
big brain	bib	176		0	34330	(1,2)	1	1275623,1275624		0	657218		0	413259
bip2	bip2	177		0	43793		0	5666735		0	100142359		0	727574+725906
bluestreak	blue	178		0	39558		0	1280706		0	663071	(1,2)	1	726381,726939
cactus	cact	179		0	34969		0	1278017		0	657221	((1,2),3)	1	725124,411012,725766
bunched	bun	180		0	34665		0	1279469	(1,2)	1	659686,660909		0	411553
chickadee	chic	181		0	33834		0	3292084		0	659243		0	406154
caudal	cad	182		0	35341		0	1279024		0	641536		0	726676
Connectin	Con	183		0	38590	(1,2)	1	1281114,1281113		0	100142174		0	724269
abrupt	ab	184		0	34560		0	1277920+3291640		0	663820		0	726547+726491
AP-2	AP-2	185		0	40398		0	1281006		0	663046		0	410893
Hand	Hand	186		0	34379		0	1274534		0	661028		0	GB19031
hunchback	hb	187		0	41032		0	1278884		0	656763		0	410209
homeobrain	hbn	188		0	47894		0	1276025		0	TC008926		0	724146
headcase	hdc	189		0	43604		0	3290737		0	664275		0	725202+724595
HEM-protein	Hem	190		0	40462		0	1275758		0	659749		0	551945
hedgehog	hh	191		0	42737		0	1281764		0	655104		0	GB30509+726929
huckebein	hkb	192		0	40549		0	1274663		0	100141671		0	GB30303
homer	homer	193		0	33944		0	1279507		0	TC015941		0	413278
hopscotch	hop	194		0	32080		0	1277627		0	663273		0	726002
atypical protein kinase C	aPKC	195		0	47594		0	1273220		0	663080		0	413834
held out wings	how	196		0	42596		0	NZ_AAAB02008984:3616656..3615703		0	662724		0	725878
hu li tai shao	hts	197		0	37230		0	1275115		0	659560		0	409713
inflated	if	198		0	32661		0	1272247		0	657993		0	727425
inturned	in	199		0	40246		0	5667308		0	663956		0	GB10716
intermediate neuroblasts defective	ind	200		0	2768974		0	1281608		0	641530		0	725058
inscuteable	insc	201		0	37355		0	NZ_AAAB02008944:3535271..3536272		0	659633		0	725029
intersex	ix	202		0	45881		0	1281934		0	TC010345		0	412534
jaguar	jar	203		0	42889		0	1272367		0	663940		0	409285
armitage	armi	204		0	38427		0	1270145		0	657522		0	725388
kayak	kay	205		0	3772082		0	1278707		0	655024		0	724169
ken and barbie	ken	206		0	37785		0	1278458		0	656389		0	551360
Kinesin heavy chain	Khc	207		0	36810		0	1271664		0	662208		0	411769
klarsicht	klar	208		0	38067		0	1271296		0	655974		0	726709
klumpfuss	klu	209		0	39228		0	1279314		0	TC002783		0	GB19470
Kruppel	Kr	210		0	38012		0	1280983		0	641605		0	411166
labial	lab	211		0	40817		0	1277306		0	652930		0	724422
Additional sex combs	Asx	212		0	36612		0	NZ_AAAB02008986:5945873..5946361		0	659240		0	GB11002
legless	lgs	213		0	43791		0	5667567		0	662357		0	551349
lilliputian	lilli	214		0	33496		0	3292098		0	664325		0	724254
lines	lin	215		0	45325		0	3291155		0	659952		0	552365
lkb1	lkb1	216		0	41673		0	NZ_AAAB02008879:1860500..1860892		0	662493		0	551198
mad2	mad2	217		0	38656		0	1272340		0	656102		0	410213
maelstrom	mael	218		0	40489		0	1281096		0	664438	(1,2)	1	409557,GB15879
mago nashi	mago	219		0	37402		0	1278913		0	656056		0	724628
mastermind	mam	220		0	36555		0	1272637		0	TC030619		0	408877
Axin	Axn	221		0	43565		0	1281346		0	655873		0	724501
maverick	mav	222		0	43804		0	1280598		0	100141984		0	726375
muscleblind	mbl	223		0	36945		0	3291367+1271202		0	100142119		0	725043+725778
multiple edematous wings	mew	224		0	32275		0	1271955		0	659601		0	552742
male-specific lethal 2	msl-2	225		0	33565		0	5666777		0	100142135		0	726108
male-specific lethal 3	msl-3	226		0	38779		0	1281207		0	658850		0	726137
Myd88	Myd88	227		0	35956		0	1274965		0	662213		0	413194
Notch	N	228		0	31293		0	1270506		0	661022		0	31293+413289
nautilus	nau	229		0	42799		0	NZ_AAAB02008987:8926057..8926191		0	660723		0	724636
bagpipe	bap	230		0	42537		0	1274346		0	663892		0	724373
nejire	nej	231		0	43856		0	1272249		0	664565		0	726332+726280
naked cuticle	nkd	232		0	44843		0	5668136		0	661080		0	724997
Notchless	Nle	233		0	33234		0	1269338		0	661129		0	GB10500
Neuroglian	Nrg	234		0	31792		0	1272313		0	658762		0	411829
numb	numb	235		0	34263		0	1279586		0	661741		0	GB18756
out at first	oaf	236		0	33435		0	1279914		0	TC008461+TC008462		0	412523
bazooka	baz	237		0	32703		0	1277384		0	661284		0	726759
proboscipedia	pb	238		0	40826		0	5667717		0	641554		0	410648
Polycomb	Pc	239		0	40358		0	NZ_AAAB02008960:12954170..12954021		0	TC012316		0	725474
pebbled	peb	240		0	31391		0	1270481		0	662162		0	GB18410
pelota	pelo	241		0	34286		0	1277715		0	655490		0	551216
prospero	pros	242		0	41363		0	1270900		0	660328		0	406073
Presenilin	Psn	243		0	40260		0	1273006		0	662627		0	413169
benign gonial cell neoplasm	bgcn	244		0	47873		0	1277999		0	TC011100		0	409028
patched	ptc	245		0	35851		0	1278302		0	656155		0	GB16349
Ptx1	Ptx1	246		0	43664		0	1272074		0	658711		0	411029
pumilio	pum	247		0	41094		0	1278739		0	656229		0	408298
Rab-protein 11	Rab11	248		0	42501		0	1274700		0	662033		0	551603
Rab-protein 5	Rab5	249		0	33418		0	1278055		0	100141572		0	GB15021
reversed polarity	repo	250		0	47285		0	1274238		0	658428		0	410151
Retinal Homeobox	Rx	251		0	37367		0	1274771		0	662264		0	724196
Star	S	252		0	33281		0	NZ_AAAB02008964:6422917..6423609		0	655080	(1,2)	1	GB13389,GB19230
crossveinless 2	cv-2	253		0	45280		0	1276836		0	660135		0	410271
scabrous	sca	254		0	36411		0	3290292		0	661313		0	725237
Sex combs reduced	Scr	255		0	40833		0	1272726		0	641600		0	551506
shifted	shf	256		0	31617		0	1272150		0	656230		0	552805
schnurri	shn	257		0	36171		0	1269586		0	660305		0	552030+GB19562
slit	sli	258		0	36746		0	1273169		0	660980		0	408960
short gastrulation	sog	259		0	32498		0	1271767		0	656968		0	410035
Bicaudal C	BicC	260		0	34946		0	1280232		0	663844		0	413416
spineless	ss	261		0	41988		0	1279681		0	656242		0	411264
stumps	stumps	262		0	41770		0	1281583		0	658100		0	411124
suppressor of Hairy wing	su(Hw)	263		0	41740		0	1273780		0	663679		0	413766
shaven	sv	264		0	43825		0	1272219		0	656415		0	726761
TBP-associated factor 2	Taf2	265		0	39164		0	1276403		0	663389		0	409906
TBP-associated factor 4	Taf4	266		0	39765		0	1276394		0	654970		0	408923
TBP-associated factor 8	Taf8	267		0	32792		0	1280571		0	663621		0	411742
tafazzin	tafazzin	268		0	36405		0	1269630		0	660672		0	550948
abdominal A	abd-A	269		0	42037		0	1272718		0	641595		0	410643
Bicaudal D	BicD	270		0	35051		0	1279626		0	659533		0	412961
Tequila	Tequila	271		0	39048		0	1276311		0	655370		0	724971
Tousled-like kinase	tlk	272		0	318206		0	1272234		0	655717		0	551673
Target of rapamycin	Tor	273		0	47396		0	1278082		0	660499		0	409393
toutatis	tou	274		0	36241		0	1277930		0	663603		0	725652+551071
Triose phosphate isomerase	Tpi	275		0	43582		0	1281542		0	664393		0	726117
tripeptidyl-peptidase II	TppII	276		0	36444		0	1275087		0	657622+TC001592		0	412055
torso-like	tsl	277		0	42564		0	1269277		0	652970		0	411173
bifocal	bif	278		0	32119		0	5667753		0	TC001382		0	408761
tudor	tud	279		0	37417		0	5668304		0	TC003753		0	GB17525
twist	twi	280		0	37655		0	3291472		0	641534		0	413254
Ultrabithorax	Ubx	281		0	42034		0	1272724		0	641535		0	551594
u-shaped	ush	282		0	33225		0	1280021		0	659918		0	GB16457
Van Gogh	Vang	283		0	35922		0	1280402		0	664055		0	551508
aristaless	al	284		0	33208		0	1277963		0	656101		0	552251
Blimp-1	Blimp-1	285		0	38638		0	1277175		0	100142159		0	408295
knot	kn	286		0	45318		0	4577491+1278255		0	662502		0	410694
net	net	287		0	45339		0	1279405		0	656286		0	GB17263
Serrate	Ser	288		0	43275		0	1273981		0	652942		0	411086
boule	bol	289		0	39049		0	1276190		0	661424		0	726917
vestigial	vg	290		0	36421		0	4578381		0	659044		0	726247
broad	br	291		0	44505		0	3290570		0	659193		0	552255
brinker	brk	292		0	31665		0	3291198		0	100142498		0	GB10994
blistered	bs	293		0	37890		0	1275249+4577813		0	661307		0	724322
brain-specific homeobox	bsh	294		0	35266		0	1280263		0	TC015394		0	724801
barentsz	btz	295		0	43331		0	1278297		0	664590		0	GB17731
Abdominal B	Abd-B	296		0	47763		0	1272715		0	641596		0	410642
C15	C15	297		0	42544		0	1274348		0	663858		0	724148
cactin	cactin	298		0	33043		0	1277141		0	664553		0	552594
Cad87A	Cad87A	299		0	41441		0	1274243		0	660159		0	409212
Cad88C	Cad88C	300		0	41774		0	1281582		0	660465		0	GB17702
Cad89D	Cad89D	301		0	42006		0	1273990		0	658847		0	413210
Cad96Cb	Cad96Cb	302		0	43033		0	1274271		0	661352		0	552546
Cad99C	Cad99C	303		0	43528		0	1273658		0	656828		0	412795
capulet	capt	304		0	45233		0	1279595		0	660855		0	410158
cappuccino	capu	305		0	33611		0	1279604		0	658225		0	726681
cheerio	cher	306		0	42066		0	1274482		0	TC005186		0	552466
Chip	Chi	307		0	37837		0	1278566		0	TC000244		0	411238
chaoptic	chp	308		0	43690		0	3289597		0	652931		0	411864
capicua	cic	309		0	53560		0	5668414		0	656907		0	GB30190
cap-n-collar	cnc	310		0	42743		0	1270380		0	657062		0	725081
canoe	cno	311		0	40620		0	4577117		0	659853		0	410161
costa	cos	312		0	35653		0	5667930		0	662184		0	552173
crumbs	crb	313		0	42896		0	1271607		0	659222		0	725591
crocodile	croc	314		0	40374		0	1276570		0	100142409		0	725966
C-terminal Src kinase	Csk	315		0	41398		0	1278803		0	656886		0	409908
corkscrew	csw	316		0	45278		0	1273523		0	660085		0	GB10063
dachs	d	317		0	34179		0	1279348		0	657914		0	551706
daughterless	da	318		0	34413		0	4577964		0	662057		0	410553
Disabled	Dab	319		0	39866		0	1277125		0	657276		0	552414
dachshund	dac	320		0	34982		0	1278020		0	652934+TC007638+100141694		0	411009
Deformed	Dfd	321		0	40832		0	5667644		0	641550		0	724252
dispatched	disp	322		0	44274		0	1273965		0	662282		0	GB13340
Delta	Dl	323		0	42313		0	1279687		0	658619		0	410351
Distal-less	Dll	324		0	37973		0	1270045		0	641606		0	726710
daughter of sevenless	dos	325		0	38321		0	1276495		0	659454		0	410840
Drop	Dr	326		0	45285		0	1274345	(1,2)	1	663938,641531	(1,2)	1	724412,724456
dishevelled	dsh	327		0	32078		0	1274593		0	655946		0	409050
defective proventriculus	dve	328		0	37546		0	1277225		0	656296		0	GB19998
deltex	dx	329		0	31589		0	1277419		0	662619		0	724935
Ecdysone receptor	EcR	330		0	35540		0	1280477		0	657515		0	406084
Epidermal growth factor receptor	Egfr	331		0	37455		0	1275679		0	660037		0	GB12207
AlkB	AlkB	332		0	2768870		0	1272107		0	661543		0	408980
egghead	egh	333		0	31239		0	1277382		0	664396		0	GB18841
egalitarian	egl	334		0	37757		0	1274835		0	657496		0	550822
extra macrochaetae	emc	335		0	38091	(1,2)	1	3290413,4578421		0	658540		0	GB19457
encore	enc	336		0	44543		0	1276282		0	100142242		0	408476
Eph receptor tyrosine kinase	Eph	337		0	43803		0	1271751		0	658635		0	408489
even skipped	eve	338		0	36039		0	4578234		0	654511		0	724845
extradenticle	exd	339		0	32567		0	1278540		0	641540		0	408763
eyes absent	eya	340		0	33916		0	1275576		0	663237		0	412528
eyes shut	eys	341		0	3771890		0	1278057		0	662068		0	GB16695+GB19577
Antennapedia	Antp	342		0	40835		0	1272720		0	641545		0	406077
forked	f	343		0	32718		0	4576088		0	661004		0	409402
Fasciclin 1	Fas1	344		0	42025		0	1270463	(1,2)	1	658991,655689		0	411344
Fasciclin 2	Fas2	345		0	31364		0	1273160		0	664545		0	409849
fumble	fbl	346		0	46234		0	1280924		0	658254		0	726156
fringe	fng	347		0	40314		0	1277047		0	100141773		0	551501
frazzled	fra	348		0	36377		0	1276754		0	663356		0	726723
fruitless	fru	349		0	42226		0	1272191		0	660340		0	409022
furry	fry	350		0	39122		0	1275103		0	657755		0	GB19491
fused	fu	351		0	32855		0	1268847		0	657139		0	726525
anterior open	aop	352		0	33392		0	1271263		0	663895		0	GB17935
Plenty of SH3s	POSH	353		0	36990		0	1278342		0	664345		0	412175
futsch	futsch	354		0	5740544		0	1281976		0	661669		0	725131
fuzzy	fy	355		0	34166		0	1277488		0	658198		0	552698
GTPase-activating protein 1	Gap1	356		0	39158		0	1269298		0	655526		0	412003
germ cell-less	gcl	357		0	35864		0	1280950		0	656141		0	552325
glass	gl	358		0	42210		0	1274478		0	641548		0	GB15041
Gliotactin	Gli	359		0	34927		0	1277780		0	657134		0	413260
Goosecoid	Gsc	360		0	33240		0	1281580		0	661394		0	726162
Hairless	H	361		0	42445		0	1274491		0	TC008831		0	100174948
AP-1gamma	AP-1gamma	362		0	31842		0	1277731		0	100142537		0	GB19569
P58IPK	P58IPK	363		0	41161		0	1273218		0	657617		0	413441
ftz transcription factor 1	ftz-f1	364		0	40045		0	1276344		0	658929		0	726450
preli-like	prel	365		0	35969		0	3291200		0	660223	(1,2)	1	408511,724764
Hemolectin	Hml	366		0	39529		0	NA		0	659879		0	411597
Gfr	Gfr	367		0	40981		0	1273569		0	655546		0	551237
CG8228	CG8228	368		0	41153		0	1278798		0	658823		0	727031+551926
SLY-1 homologous	Slh	369		0	33434		0	1270593		0	664213		0	410849
nmdyn-D6	nmdyn-D6	370		0	32396		0	4576191		0	661386		0	724131
CAP	CAP	371		0	36084		0	1269515		0	659365		0	409655
Ras opposite	Rop	372		0	38493		0	1272929		0	655100		0	412924
slowmo	slmo	373		0	44132		0	1277924		0	664016		0	552354
abnormal wing discs	awd	374		0	43739		0	1269986		0	655847		0	409861
Tetratricopeptide repeat protein 2	Tpr2	375		0	34984		0	1279947		0	658427		0	410037
Myosin heavy chain	Mhc	376		0	35007		0	1279567		0	659358		0	409843
alpha-Adaptin	alpha-Adaptin	377		0	33211		0	1271372		0	660011		0	411147
crooked legs	crol	378		0	34592		0	1278927		0	662621		0	409470
Hormone receptor-like in 39	Hr39	379		0	35398		0	1271305		0	TC014986		0	413474
#Gene_Desc	Gene_Symbol	#primary_group_no	dup_history	dup_member	DMEL	dup_history	dup_member	AGAM	dup_history	dup_member	TCAS	dup_history	dup_member	AMEL
