# Supplementary material for: Genomic signatures of globally enhanced gene duplicate accumulation in the megadiverse higher Diptera fueling intralocus sexual conflict resolution
Source: PeerJ. 2020 Oct 12;8:e10012. doi: 10.7717/peerj.10012 (PMC7560327; doi:10.7717/peerj.10012)
Supplement: Supplemental Information 4 [file peerj-08-10012-s004.xlsx]

## Sheet: Mdes
4	Gene_Symbol	#primary_group_no	pre-Brach	dup_history	dup_member	DMEL	Mdes_ortholog_count	MDES
CTP:phosphocholine cytidylyltransferase 1	Cct1	1.1		(1,2);	1	117353	1	maker-X1Random.38-augustus-gene-1.89-mRNA-1
phosphoethanolamine cytidylyltransferase	Pect	1.2			0	34716	1	snap_masked-A1.19-abinit-gene-2.20-mRNA-1
CTP:phosphocholine cytidylyltransferase 2	Cct2	1.3			2	38180	0	NA
forkhead domain 96Ca	fd96Ca	1000.15		(1,2);	1	43010	1	maker-A1.26-snap-gene-1.3-mRNA-1
CG3523	CG3523	2.2			2	33524	1	augustus_masked-A1.3-abinit-gene-6.6-mRNA-1
CG17374	CG17374	2.3			0	3355111	3	maker-A2.1-augustus-gene-18.68-mRNA-1,snap_masked-A2.12-abinit-gene-33.37-mRNA-1,maker-A2.1-augustus-gene-18.69-mRNA-1
CG9571	CG9571	1000.4		((3,4),5);	5	33010	0	NA
Hex-t2	Hex-t2	3.2			2	43191	0	NA
hexokinase C	Hex-C	3.3			3	44008	0	NA
hexokinase A	Hex-A	3.4			4	45875	2	augustus_masked-X2.11-abinit-gene-3.1-mRNA-1,augustus_masked-X1.1-abinit-gene-33.8-mRNA-1
HBS1	HBS1	4.1			0	117365	2	maker-Un.17272-snap-gene-2.60-mRNA-1,maker-Un.23017-snap-gene-0.4-mRNA-1
Ef1alpha-like factor	Elf	4.2			0	34658	1	augustus_masked-Un.19865-abinit-gene-1.10-mRNA-1
elongation factor 1alpha48D	Ef1alpha48D	4.3			0	36271	1	maker-X2.17-snap-gene-10.91-mRNA-1
elongation factor 1alpha100E	Ef1alpha100E	4.4			0	43736	0	NA
CG10251	CG10251	5.1			0	117368	1	maker-Un.19431-snap-gene-4.61-mRNA-1
vesicular monoamine transporter	Vmat	5.2			0	3346192	1	maker-Un.5686-augustus-gene-0.3-mRNA-1
VAChT	VAChT	5.3			0	42795	1	maker-X1.7-augustus-gene-24.35-mRNA-1
fermitin 1	Fit1	1001.1		(1,2);	1	38488	1	augustus_masked-Un.11629-abinit-gene-0.0-mRNA-1+maker-Un.23394-augustus-gene-0.6-mRNA-1
Fad2	Fad2	6.2			3	44006	0	NA
desat2	desat2	6.3			2	41536	0	NA
CG8630	CG8630	6.4			0	41629	0	NA
CG15531	CG15531	6.5			0	43592	1	augustus_masked-X1.1-abinit-gene-36.4-mRNA-1
CG9743	CG9743	6.6			0	43593	0	NA
VhaM9.7-1	VhaM9.7-1	1004.1		((1,2),3);	1	38503	0	NA
beta-Tubulin at 56D	betaTub56D	7.2			0	37238	1	maker-X1.5-augustus-gene-7.31-mRNA-1
beta-Tubulin at 60D	betaTub60D	7.3			0	37888	0	NA
beta-Tubulin at 85D	betaTub85D	7.4			0	41124	0	NA
beta-Tubulin at 97EF	betaTub97EF	7.5			2	43359	0	NA
CG7514	CG7514	1008.1		((1,2),3);	1	38571	0	NA
gustatory receptor 64e	Gr64e	8.2			2	3771916	0	NA
Trehalose-sensitivity	Tre	8.3			1	44873	0	NA
CG12493	CG12493	1009.1		((1,2),3);	1	38575	0	NA
tumbleweed	tum	9.2			2	36538	3	maker-A1.46-augustus-gene-24.73-mRNA-1,maker-A1.41-augustus-gene-12.28-mRNA-1,maker-Un.16503-snap-gene-0.47-mRNA-1
trapped in endoderm-1	Tre1	10.1			0	140439	1	snap_masked-A1.47-abinit-gene-11.22-mRNA-1
moody	moody	10.2			0	31168	1	snap_masked-A2Random.62-abinit-gene-13.24-mRNA-1
CG4313	CG4313	10.3			0	31169	1	maker-Un.3296-augustus-gene-0.24-mRNA-1
CG12027	CG12027	1010.1		(1,2);	1	38592	0	NA
CG1681	CG1681	11.2			4	32299	0	NA
CG1702	CG1702	11.3			3	33047	0	NA
CG30000	CG30000	11.4			2	35995	0	NA
CG4769	CG4769	1012.1		(1,2);	1	38612	1	augustus_masked-X1.7-abinit-gene-85.2-mRNA-1
CG30037	CG30037	12.2			2	246409	0	NA
CG33145	CG33145	12.3			3	36279	0	NA
spook	spo	1014.1		(1,2);	1	38631	0	NA
CG18278	CG18278	13.2			2	36487	0	NA
sulfated	Sulf1	13.3			0	53437	1	maker-A2.5-snap-gene-8.23-mRNA-1
CG5592	CG5592	1016.1		((1,2),3);	1	38662	0	NA
shutdown	shu	14.2			2	45360	2	augustus_masked-A1.32-abinit-gene-10.5-mRNA-1,maker-X2.3-snap-gene-7.7-mRNA-1
CG32407	CG32407	1017.1		(1,2);	1	38667	0	NA
levy	levy	15.2			0	37728	1	augustus_masked-Un.6375-abinit-gene-0.4-mRNA-1
CG14077	CG14077	15.3			2	40066	0	NA
CG10479	CG10479	1018.1		(1,2);	1	38674	0	NA
veil	veil	16.2			2	36968	0	NA
CG30103	CG30103	16.3			3	36969	0	NA
CG42249	CG42249	16.4			0	32043	1	maker-X1.7-snap-gene-8.6-mRNA-1
CG10445	CG10445	1019.2		(1,2);	1	40938	0	NA
CG30109	CG30109	17.2			2	246461	1	augustus_masked-X1.5-abinit-gene-1.3-mRNA-1
CG30152	CG30152	18.1			0	246485	0	NA
CG7949	CG7949	18.2			0	39221	1	maker-X1.7-augustus-gene-73.74-mRNA-1
CG30157	CG30157	19.1			0	246489	1	snap_masked-X2.16-abinit-gene-5.42-mRNA-1
CG16979	CG16979	19.2			0	39687	1	maker-X2.17-snap-gene-16.3-mRNA-1
CG4199	CG4199	102.1		(1,2);	1	31174	0	NA
CG31988	CG31988	20.2			1	326182	0	NA
CG34325	CG34325	20.3			3	32656	1	maker-Un.23482-snap-gene-0.37-mRNA-1
paxillin	Pax	20.4			0	35215	1	maker-Un.17049-augustus-gene-0.5-mRNA-1
CG31624	CG31624	20.5			2	35393	0	NA
transportin	Trn	1020.1		(1,2);	1	38721	1	snap_masked-X1Random.8-abinit-gene-12.23-mRNA-1
photorepair	phr	21.2			2	35735	1	maker-X2.13-snap-gene-8.49-mRNA-3
CG12822	CG12822	21.3			0	35737	1	maker-X2.13-augustus-gene-13.90-mRNA-1
CG30193	CG30193	22.1			0	246512	1	snap_masked-X2.17-abinit-gene-4.6-mRNA-1
LpR1	LpR1	1021.1		(1,2);	1	2768687	1	maker-Un.9350-snap-gene-0.61-mRNA-1
CG4960	CG4960	22.3			2	43115	0	NA
CG31217	CG31217	1021.12	1	(3,4);	3	42032	2	maker-X1Random.8-augustus-gene-19.18-mRNA-1,maker-X1Random.8-augustus-gene-18.16-mRNA-1
CG17739	CG17739	23.2			3	36333	1	snap_masked-X2.10-abinit-gene-3.34-mRNA-1
CG30046	CG30046	23.3			2	36334	0	NA
fat-spondin	fat-spondin	23.4			0	36919	1	augustus_masked-X1.4-abinit-gene-0.10-mRNA-1
bestrophin 4	Best4	1022.2		((1,2),3);	1	39660	0	NA
CG13510	CG13510	24.2			1	37596	0	NA
CG42565	CG42565	24.3			2	37598	0	NA
CG4250	CG4250	24.4			5	37599	0	NA
CG30269	CG30269	24.5			4	37600	0	NA
CG13516	CG13516	24.6			6	3885599	0	NA
CG42566	CG42566	24.7			7	8674120	0	NA
eIF4E-4	eIF4E-4	1023.1		((((1,2),3),4),5);	1	38743	0	NA
CG30268	CG30268	25.2			2	37610	0	NA
CG30284	CG30284	26.1			0	246527	0	NA
CG34394	CG34394	26.2			0	33552	2	augustus_masked-Un.22747-abinit-gene-0.0-mRNA-1,snap_masked-Un.8424-abinit-gene-0.1-mRNA-1
Cht12	Cht12	27.1			0	246535	0	NA
Cht9	Cht9	27.2			1	37392	0	NA
chitinase 2	Cht2	27.3			0	38223	1	snap_masked-X1Random.8-abinit-gene-7.34-mRNA-1
chitinase 4	Cht4	27.4			2	49815	0	NA
phosphoribosylamidotransferase 2	Prat2	1024.1	1	(1,2);	1	38753	2	augustus_masked-A1.45-abinit-gene-8.8-mRNA-1,augustus_masked-Un.3548-abinit-gene-0.3-mRNA-1
CG3734	CG3734	1025.2		(((1,2),3),4);	1	42318	0	NA
Sema-1a	Sema-1a	28.2			0	34192	0	NA
Sema-2a	Sema-2a	28.3			2	36846	1	maker-X1Random.3-snap-gene-2.25-mRNA-1
Sema-1b	Sema-1b	28.4			0	37007	1	maker-Un.20086-snap-gene-3.27-mRNA-2
Semaphorin-5c	Sema-5c	28.5			0	37066	1	snap_masked-A2.12-abinit-gene-6.67-mRNA-1
pastrel	pst	1027.1		((1,2),3);	1	38818	0	NA
CG12602	CG12602	29.2			3	34587	0	NA
CG7678	CG7678	29.3			1	42214	0	NA
Vha100-2	Vha100-2	29.4			2	42216	1	maker-A1.41-augustus-gene-2.51-mRNA-1
Vha100-1	Vha100-1	29.5			0	43442	1	snap_masked-X1Random.8-abinit-gene-7.28-mRNA-1
CG7387	CG7387	1031.1		(1,2);	1	38915	0	NA
CG30345	CG30345	30.2			2	246553	0	NA
CG8008	CG8008	30.3			3	35935	0	NA
CG15553	CG15553	30.4			4	43677	0	NA
CG6776	CG6776	1033.1		((1,2),3);	1	38972	0	NA
Ubiquinol-cytochrome C reductase complex 11 kDa protein	Ucrh	31.2			2	5740185	0	NA
CG15262	CG15262	1037.1		((1,2),3);	1	34901	0	NA
CG12857	CG12857	32.2			2	36642	0	NA
polyhomeotic proximal	ph-p	104.1		(1,2);	1	31181	0	NA
CG3814	CG3814	33.2			1	36418	0	NA
N-methyl-D-aspartate receptor-associated protein	Nmda1	33.3			2	36419	0	NA
CG9722	CG9722	33.5			3	41724	0	NA
CG5144	CG5144	1041.1		(1,2);	1	39040	0	NA
proteasome alpha7 subunit	Prosalpha7	34.2			0	36018	0	NA
proteasome alpha1 subunit	Prosalpha1	34.3			2	45780	0	NA
pleiohomeotic like	phol	1042.1		(1,2);	1	39095	0	NA
CG14985	CG14985	35.2			2	38470	1	augustus_masked-X2.17-abinit-gene-7.2-mRNA-1
CG12620	CG12620	1045.1		((1,2),3);	1	35034	0	NA
CG12970	CG12970	36.2			2	36744	0	NA
CG7194	CG7194	36.3			3	38933	0	NA
Calpain-B	CalpB	1046.2		(1,2);	1	39165	0	NA
CG14490	CG14490	37.2			2	37041	0	NA
tyrosine decarboxylase 1	Tdc1	38.1			0	35573	1	maker-X2.17-snap-gene-13.14-mRNA-1
tyrosine decarboxylase 2	Tdc2	38.2			0	246620	1	maker-X2.17-snap-gene-13.15-mRNA-1
dopa decarboxylase	Ddc	38.3			0	35190	0	NA
histidine decarboxylase	Hdc	38.4			0	36076	1	maker-A1Random.66-snap-gene-10.64-mRNA-1
CG3630	CG3630	105.1		(1,2);	1	31189	1	augustus_masked-A2.7-abinit-gene-1.8-mRNA-1
secretory phospholipase A2	sPLA2	39.2			2	35665	1	maker-X2.10-snap-gene-3.66-mRNA-1
scylla	scyl	1050.1		(1,2);	1	39270	0	NA
peroxiredoxin 6005	Prx6005	40.2			0	33493	0	NA
peroxiredoxin 2540	Prx2540-2	40.3			2	36098	2	maker-A2.5-augustus-gene-9.48-mRNA-1,maker-A2.5-augustus-gene-9.47-mRNA-1
CG12896	CG12896	40.4			3	36101	0	NA
CG12289	CG12289	1051.1		((1,2),3);	1	39279	0	NA
circadianly regulated gene	Crg-1	41.2			2	43900	1	snap_masked-A1.29-abinit-gene-9.23-mRNA-1
Liprin-alpha	Liprin-alpha	42.1			0	249072	2	maker-A1.21-snap-gene-1.55-mRNA-1,maker-Un.9221-snap-gene-0.0-mRNA-1
CG11206	CG11206	42.2			0	37552	0	NA
CG10743	CG10743	42.3			0	39524	0	NA
Tim13	Tim13	1052.1		((1,2),3);	1	39327	0	NA
CG31693	CG31693	43.2			1	318887	0	NA
hoepel2	hoe2	43.3			0	33700	0	NA
CG13801	CG13801	43.4			3	38299	0	NA
CG11262	CG11262	43.5			2	39471	0	NA
fused lobes	fdl	44.1			0	250735	1	augustus_masked-X1.7-abinit-gene-65.6-mRNA-1
hexosaminidase 2	Hexo2	44.2			0	31808	1	maker-A1.32-snap-gene-11.91-mRNA-1
hexosaminidase 1	Hexo1	44.3			0	38528	1	maker-X1Random.2-snap-gene-22.5-mRNA-1
ribosomal protein L10Ab	RpL10Ab	1053.1		(1,2);	1	39338	0	NA
arrest	aret	45.2			2	34648	1	augustus_masked-A1.33-abinit-gene-4.6-mRNA-1
bruno-3	bru-3	45.3			0	39527	1	maker-X1.7-snap-gene-11.75-mRNA-1
GlcAT-I	GlcAT-I	46.1			0	251900	1	augustus_masked-Un.17688-abinit-gene-0.0-mRNA-1
GlcAT-S	GlcAT-S	46.2			0	34282	1	maker-Un.17588-augustus-gene-1.49-mRNA-1
GlcAT-P	GlcAT-P	46.3			0	39262	1	maker-A2.12-snap-gene-6.109-mRNA-1
CG32263	CG32263	1054.1		(1,2);	1	317944	0	NA
CG10252	CG10252	47.2			2	42794	1	maker-Un.15623-snap-gene-0.5-mRNA-1
CG1662	CG1662	1054.3		(3,4);	3	32296	1	augustus_masked-A1.36-abinit-gene-6.3-mRNA-1
juvenile hormone epoxide hydrolase 2	Jheh2	48.2			3	37181	1	snap_masked-X2.13-abinit-gene-4.35-mRNA-1
juvenile hormone epoxide hydrolase 3	Jheh3	48.3			2	37182	0	NA
X11L	X11L	49.1			0	252671	0	NA
X11Lbeta	X11Lbeta	49.2			0	31997	3	maker-A1.46-snap-gene-25.68-mRNA-1,snap_masked-X2.10-abinit-gene-9.11-mRNA-1,snap_masked-X2.5-abinit-gene-1.49-mRNA-1
esterase 6	Est-6	1055.1		(1,2);	1	39392	0	NA
nimrod B1	nimB1	50.2			1	34813	0	NA
nimrod B4	nimB4	50.3			2	34814	0	NA
nimrod B5	nimB5	50.4			3	34815	0	NA
nimrod C1	nimC1	50.5			5	34816	0	NA
nimrod C2	nimC2	50.6			6	34818	0	NA
nimrod C4	nimC4	50.7			7	34824	0	NA
eater	eater	50.8			8	43262	2	maker-A2.7-augustus-gene-5.31-mRNA-1,maker-Un.5935-augustus-gene-1.6-mRNA-1
twin of eyg	toe	1058.1		(1,2);	1	39418	0	NA
glaikit	gkt	51.2			2	33530	1	maker-A1.47-augustus-gene-8.56-mRNA-1
araucan	ara	1059.1		(1,2);	1	39439	1	maker-X1Random.2-snap-gene-1.25-mRNA-1
CG18858	CG18858	52.2			2	326109	0	NA
CG3621	CG3621	106.1		(1,2);	1	31190	0	NA
NEM-sensitive fusion protein 2	Nsf2	53.2			2	41694	0	NA
comatose	comt	53.3			3	47091	1	maker-A1.47-augustus-gene-12.112-mRNA-1
CG31469	CG31469	54.1			0	261628	0	NA
CG7998	CG7998	1060.1		((1,2),3);	3	42185	1	maker-A2.1-augustus-gene-18.73-mRNA-1
primo-2	primo-2	54.3			2	3772427	0	NA
CG11267	CG11267	1061.1	1	(1,2);	1	39476	2	maker-Un.21950-augustus-gene-4.3-mRNA-1,augustus_masked-Un.4392-abinit-gene-0.5-mRNA-1
unc-115	unc-115	55.2			2	41178	1	maker-X1.7-snap-gene-51.3-mRNA-1
CG11255	CG11255	1062.1		(1,2);	1	39479	1	maker-Un.20086-augustus-gene-4.43-mRNA-1
CG9119	CG9119	56.2			2	38124	1	augustus_masked-Un.16586-abinit-gene-0.7-mRNA-1
dpr9	dpr9	57.1			0	2768670	1	maker-A2.11-snap-gene-2.44-mRNA-1
dpr8	dpr8	57.2			0	32387	0	NA
dpr13	dpr13	57.3			0	3885598	1	augustus_masked-A2.7-abinit-gene-5.1-mRNA-1
CG11251	CG11251	1063.1		(1,2);	1	39490	0	NA
dpr6	dpr6	57.6			2	50296	1	maker-A2.9-snap-gene-4.3-mRNA-1
dpr12	dpr12	57.7			0	50320	0	NA
CG42596	CG42596	57.8			0	8674044	0	NA
breathless	btl	1067.5		(1,2);	1	39564	0	NA
CG32703	CG32703	58.2			0	31877	1	maker-Un.23261-augustus-gene-3.51-mRNA-1+maker-Un.17040-snap-gene-0.4-mRNA-1
rolled	rl	58.3			0	3354888	1	augustus_masked-Un.7727-abinit-gene-0.0-mRNA-1
p38b	p38b	58.4			1	34780	1	maker-X1Random.3-augustus-gene-13.29-mRNA-1
nemo	nmo	58.5			0	38890	0	NA
Mpk2	Mpk2	58.6			2	42866	0	NA
basket	bsk	58.7			0	44801	1	maker-Un.12539-snap-gene-0.31-mRNA-1
cardioacceleratory peptide receptor	CcapR	59.1			0	2768688	0	NA
Gonadotropin-releasing hormone receptor	GRHR	59.3			0	33942	1	maker-A1.47-augustus-gene-11.46-mRNA-1
CG9384	CG9384	1069.1		(1,2);	1	39608	1	augustus_masked-X2.3-abinit-gene-1.6-mRNA-1
Ir76a	Ir76a	60.2			2	40157	0	NA
twin of m4	Tom	1070.1		(1,2);	1	39619	1	maker-X1.4-augustus-gene-8.0-mRNA-1
CG13827	CG13827	61.2			2	42751	1	augustus_masked-X1.7-abinit-gene-101.23-mRNA-1
defective proboscis extension response	dpr	62.1			0	2768858	2	maker-Un.17588-snap-gene-16.15-mRNA-1,maker-Un.17588-augustus-gene-15.23-mRNA-1
dpr7	dpr7	62.2			0	2768865	0	NA
dpr4	dpr4	62.3			0	3346160	0	NA
ran-like	ran-like	1073.1		(1,2);	1	39666	0	NA
dpr2	dpr2	62.5			2	3346227	0	NA
dpr5	dpr5	62.6			0	41381	0	NA
CG7276	CG7276	1074.1		(1,2);	1	39668	0	NA
Sperm-specific dynein intermediate chain 4	Sdic4	63.2			3	2768886	0	NA
Sperm-specific dynein intermediate chain 3	Sdic3	63.3			4	318231	0	NA
Sperm-specific dynein intermediate chain 1	Sdic1	63.4			2	43984	0	NA
short wing	sw	63.5			5	44160	1	maker-Un.10226-snap-gene-0.4-mRNA-1+maker-Un.7478-augustus-gene-0.29-mRNA-1
CG18081	CG18081	1076.1		(1,2);	1	39725	0	NA
Mec2	Mec2	64.2			2	32905	0	NA
CG2970	CG2970	64.3			0	37807	1	augustus_masked-Un.17588-abinit-gene-2.6-mRNA-1
CG42540	CG42540	64.4			0	38562	1	maker-X1Random.32-augustus-gene-0.3-mRNA-1
CG14644	CG14644	64.5			3	40536	0	NA
CG33275	CG33275	65.1			0	2768948	1	maker-X1Random.8-augustus-gene-37.50-mRNA-1
CG30440	CG30440	65.2			0	35496	1	maker-X2.4-snap-gene-1.60-mRNA-2
trio	trio	65.3			0	43974	1	maker-Un.9679-augustus-gene-1.19-mRNA-1
CG17026	CG17026	1079.1		((1,2),(3,4));	1	39739	0	NA
CG4853	CG4853	66.2			2	36974	0	NA
msta	msta	108.1		(1,2);	1	31200	0	NA
CG40228	CG40228	67.2			2	5740664	1	augustus_masked-X1.7-abinit-gene-32.3-mRNA-1
CG5389	CG5389	1081.1		(1,2);	1	39761	0	NA
Rpn12	Rpn12	68.2			2	39845	1	augustus_masked-Un.14877-abinit-gene-0.0-mRNA-1
CG4753	CG4753	1082.1		(1,2);	1	39819	0	NA
CG14720	CG14720	69.2			2	41415	0	NA
CG34429	CG34429	69.3			3	5740606	0	NA
CG34428	CG34428	69.4			4	5740867	1	augustus_masked-A2.12-abinit-gene-31.17-mRNA-1
seven in absentia	sina	1083.1	1	(1,2);	1	39884	2	maker-X1.7-snap-gene-10.8-mRNA-1,snap_masked-A2.13-abinit-gene-12.30-mRNA-1
Psf1	Psf1	70.2			2	38136	1	maker-Un.22549-augustus-gene-0.6-mRNA-1
CG5103	CG5103	1084.1		(1,2);	1	40012	0	NA
CG14567	CG14567	71.2			2	40420	1	maker-X1.3-snap-gene-0.54-mRNA-1
zormin	zormin	72.1			0	2769001	1	maker-X1.7-augustus-gene-112.76-mRNA-1
sallimus	sls	72.2			0	44013	1	maker-X1.7-augustus-gene-112.77-mRNA-1
CG42330	CG42330	73.1			0	2769008	2	maker-X1Random.3-snap-gene-15.27-mRNA-1,augustus_masked-X1Random.3-abinit-gene-15.2-mRNA-1
down syndrome cell adhesion molecule	Dscam	73.2			0	35652	2	maker-X2.15-snap-gene-2.37-mRNA-1,maker-X2.15-augustus-gene-2.34-mRNA-1
CG42256	CG42256	73.3			0	38788	1	maker-X1.7-snap-gene-109.66-mRNA-1
Dscam3	Dscam3	73.4			0	42103	2	maker-X1Random.8-augustus-gene-32.42-mRNA-1,maker-X1Random.8-snap-gene-32.3-mRNA-1
CG3191	CG3191	109.1		((1,2),3);	1	31209	0	NA
scute	sc	74.2			2	30982	1	maker-A1.11-snap-gene-2.18-mRNA-1
lethal of scute	l(1)sc	74.3			3	30983	0	NA
asense	ase	74.4			0	30985	2	augustus_masked-Un.8608-abinit-gene-0.0-mRNA-1,augustus_masked-A1.11-abinit-gene-1.11-mRNA-1
cytochrome P450-4g1	Cyp4g1	75.1			0	30986	0	NA
Cyp4g15	Cyp4g15	75.2			0	32093	3	maker-A1.41-augustus-gene-17.43-mRNA-1,maker-A1.11-augustus-gene-1.46-mRNA-1,augustus_masked-A1.11-abinit-gene-1.8-mRNA-1
CG3156	CG3156	76.1			0	30994	1	augustus_masked-A2.12-abinit-gene-10.14-mRNA-1
CG1824	CG1824	76.2			0	32208	1	augustus_masked-A2.14-abinit-gene-9.1-mRNA-1
silver	svr	77.1			0	30998	1	maker-A2Random.62-augustus-gene-11.53-mRNA-1
CG4678	CG4678	77.2			0	32652	0	NA
ventral nervous system defective	vnd	78.1			0	31003	1	maker-Un.21950-augustus-gene-4.87-mRNA-1
scarecrow	scro	78.2			0	3355151	0	NA
tinman	tin	78.3			0	42536	1	augustus_masked-X1.7-abinit-gene-107.0-mRNA-1
bagpipe	bap	78.4			0	42537	1	maker-X1.7-augustus-gene-107.24-mRNA-1
CG9449	CG9449	1091.1		((1,2),3);	1	40117	1	maker-X2.17-snap-gene-8.8-mRNA-1
CG17010	CG17010	79.2			2	34650	0	NA
TBP-associated factor 6	Taf6	1092.1		(1,2);	1	40134	1	maker-A2.14-augustus-gene-6.45-mRNA-1
Roc2	Roc2	80.2			0	36246	0	NA
Roc1b	Roc1b	80.3			2	53445	0	NA
translocase of outer membrane 20	Tom20	1095.1		(1,2);	1	40189	0	NA
skpB	skpB	81.2			3	36298	0	NA
skpF	skpF	81.3			1	37713	0	NA
CG6680	CG6680	1099.1	1	((1,2),3);	3	40234	3	maker-Un.11054-augustus-gene-0.6-mRNA-1,maker-A2.15-snap-gene-1.72-mRNA-1,augustus_masked-A2.15-abinit-gene-1.11-mRNA-1
CG9582	CG9582	82.2			2	34230	0	NA
CG30005	CG30005	11.1		(((1,2),3),4);	1	246386	0	NA
ribosomal protein L22-like	RpL22-like	83.2			2	37684	0	NA
protein O-mannosyltransferase 2	tw	84.1			0	31024	1	maker-A1.41-augustus-gene-9.63-mRNA-1
CG11999	CG11999	84.2			0	40637	0	NA
CG6434	CG6434	1100.1		(1,2);	1	40238	0	NA
CG32971	CG32971	85.2			2	318271	0	NA
Rac1	Rac1	1101.3		(1,2);	1	38146	1	snap_masked-A2.7-abinit-gene-6.40-mRNA-1
CG10672	CG10672	86.2			0	38598	1	maker-Un.9450-augustus-gene-0.6-mRNA-1
CG31549	CG31549	86.3			1	40689	0	NA
CG12171	CG12171	86.4			2	40690	0	NA
CG31546	CG31546	86.5			3	40691	0	NA
CG12068	CG12068	86.6			0	43512	1	maker-Un.8318-snap-gene-0.8-mRNA-1
CG3603	CG3603	86.7			0	31289	1	maker-X1Random.2-snap-gene-30.8-mRNA-1
CG31548	CG31548	86.8			0	318794	1	maker-Un.20633-snap-gene-3.10-mRNA-1
CG7322	CG7322	86.9			0	32880	1	augustus_masked-Un.16534-abinit-gene-2.8-mRNA-1
knirps-like	knrl	1102.1	1	(1,2);	1	40285	2	maker-Un.7038-snap-gene-0.0-mRNA-1,augustus_masked-Un.16430-abinit-gene-12.0-mRNA-1
CG31272	CG31272	87.2			3	326130	0	NA
CG14691	CG14691	87.3			2	41287	0	NA
CG40100	CG40100	1103.1		(1,2);	1	3355045	0	NA
Transcription-factor-IIA-S	TfIIA-S	88.2			2	42822	1	maker-X1.7-augustus-gene-88.35-mRNA-2
CG10512	CG10512	1104.1	1	((1,2),3);	3	40339	2	snap_masked-X1.7-abinit-gene-101.71-mRNA-1,augustus_masked-Un.21793-abinit-gene-0.0-mRNA-1
CG14629	CG14629	89.2			1	31055	0	NA
CG11378	CG11378	89.3			2	31060	0	NA
CG3655	CG3655	90.1			0	31056	1	augustus_masked-A2Random.62-abinit-gene-0.1-mRNA-1
CG9391	CG9391	1105.1	1	(1,2);	1	40346	2	augustus_masked-A1.10-abinit-gene-4.5-mRNA-1,snap_masked-Un.16534-abinit-gene-3.56-mRNA-1
CG12715	CG12715	90.3			2	32252	0	NA
CG2854	CG2854	111.1		(1,2);	1	31219	0	NA
neosin	Neos	91.2			3	38795	0	NA
CG18823	CG18823	91.3			2	59184	0	NA
CG3638	CG3638	92.1			0	31071	1	snap_masked-Un.19322-abinit-gene-8.25-mRNA-1
tweety	tty	92.2			0	33109	1	maker-A1.29-augustus-gene-14.47-mRNA-1
CG11403	CG11403	93.1			0	31072	1	maker-Un.16779-augustus-gene-0.8-mRNA-1+augustus_masked-A2.3-abinit-gene-4.20-mRNA-1
CG4078	CG4078	93.2			0	31497	5	maker-A2.15-snap-gene-1.73-mRNA-2,maker-A2.14-snap-gene-11.4-mRNA-1,maker-Un.12148-snap-gene-0.4-mRNA-1,maker-Un.22549-augustus-gene-0.7-mRNA-1,maker-Un.22500-augustus-gene-0.3-mRNA-1
xeroderma pigmentosum D	Xpd	93.4			0	37414	1	maker-Un.11350-snap-gene-0.4-mRNA-1+augustus_masked-Un.16006-abinit-gene-0.1-mRNA-1
CG30156	CG30156	1115.1		(1,2);	1	246488	0	NA
CG32319	CG32319	94.2			2	317976	0	NA
CG11418	CG11418	95.1			0	31081	1	maker-A2Random.62-augustus-gene-13.59-mRNA-1
CG2887	CG2887	1115.6		((3,4),5);	5	31978	0	NA
Gld2	Gld2	95.3			2	42602	1	snap_masked-Un.21950-abinit-gene-1.29-mRNA-1
embryonic lethal abnormal vision	elav	96.1			0	31000	1	maker-A2.11-snap-gene-8.6-mRNA-1
found in neurons	fne	96.2			0	32245	0	NA
RNA-binding protein 9	Rbp9	96.3			0	33498	0	NA
CG14457	CG14457	1116.1		((1,2),3);	3	40479	1	maker-X1.7-snap-gene-39.20-mRNA-1
CG3056	CG3056	96.5			1	31086	0	NA
CG5213	CG5213	96.6			2	41892	0	NA
nucleostemin 3	ns3	97.1			0	31097	1	maker-A2.12-snap-gene-34.15-mRNA-1
nucleostemin 4	ns4	97.2			0	35338	1	maker-Un.23482-snap-gene-1.58-mRNA-1
dpr16	dpr16	1119.1		(((1,2),3),4);	3	40619	0	NA
CG14778	CG14778	98.2			2	31100	0	NA
CG2022	CG2022	98.3			0	40615	1	maker-X1.7-augustus-gene-101.159-mRNA-1
CG2604	CG2604	1121.1		(1,2);	1	40623	1	augustus_masked-X1.7-abinit-gene-85.10-mRNA-1
CG15874	CG15874	99.2			2	37899	0	NA
G9a	G9a	100.1			0	30971	2	maker-A2.15-augustus-gene-1.61-mRNA-1,maker-Un.4066-snap-gene-0.0-mRNA-1
pr-set7	pr-set7	100.2			0	41743	4	maker-A1.36-snap-gene-1.37-mRNA-1,maker-A1.36-augustus-gene-0.60-mRNA-1,snap_masked-Un.7089-abinit-gene-0.1-mRNA-1,maker-X1Random.1-augustus-gene-0.0-mRNA-1
Mes-4	Mes-4	100.3			0	43351	2	maker-X1Random.3-augustus-gene-8.44-mRNA-1,maker-Un.17272-augustus-gene-6.71-mRNA-1
trithorax-related	trr	100.4			0	31149	2	maker-X2.8-augustus-gene-21.42-mRNA-1,maker-Un.22824-snap-gene-0.2-mRNA-1
Set2	Set2	100.5			0	32301	1	augustus_masked-A2.13-abinit-gene-3.1-mRNA-1
CG40351	CG40351	100.6			0	3354971	1	maker-A2.1-snap-gene-21.15-mRNA-1
enhancer of zeste	E(z)	100.7			0	39203	1	augustus_masked-Un.22713-abinit-gene-0.2-mRNA-1
absent, small, or homeotic discs 1	ash1	100.8			0	40133	1	augustus_masked-Un.17272-abinit-gene-4.3-mRNA-1
CG4565	CG4565	100.9			0	41303	1	maker-X1Random.2-snap-gene-3.3-mRNA-1
trithorax	trx	100.10			0	41737	1	snap_masked-A2.9-abinit-gene-13.133-mRNA-1
Edem1	Edem1	101.1			0	31154	1	maker-Un.6375-augustus-gene-0.26-mRNA-1
Edem2	Edem2	101.2			0	34714	1	augustus_masked-A1.7-abinit-gene-4.4-mRNA-1
CG34362	CG34362	1124.3		(1,2);	1	43362	0	NA
CG10700	CG10700	102.2			2	35183	0	NA
CG16903	CG16903	103.1			0	31178	1	augustus_masked-X2Random.32-abinit-gene-1.9-mRNA-1
cyclin K	CycK	103.2			0	49816	2	maker-Un.16448-snap-gene-0.0-mRNA-1,augustus_masked-X1Random.2-abinit-gene-30.10-mRNA-1
another transcription unit	Atu	1125.1		(1,2);	1	40684	1	maker-A2.11-augustus-gene-10.104-mRNA-1
SAM-motif ubiquitously expressed punctatedly localized protein	Samuel	104.2			0	34530	1	maker-A1.28-snap-gene-19.65-mRNA-1
polyhomeotic distal	ph-d	104.3			2	44889	1	maker-A2.12-augustus-gene-31.81-mRNA-1
giant	gt	113.1	1	(1,2);	1	31227	3	snap_masked-A2.1-abinit-gene-23.86-mRNA-1,maker-A2.1-snap-gene-23.20-mRNA-1,augustus_masked-A2.1-abinit-gene-22.14-mRNA-1
CG2113	CG2113	105.2			2	38356	0	NA
sorbitol dehydrogenase 1	Sodh-1	1134.1		(1,2);	1	40836	0	NA
CG6914	CG6914	106.2			2	40477	0	NA
monocarboxylate transporter 1	Mct1	107.1			0	31198	1	maker-A1.27-snap-gene-6.41-mRNA-1
CG3409	CG3409	107.2			0	35578	2	augustus_masked-X1Random.2-abinit-gene-0.1-mRNA-1,maker-Un.15183-augustus-gene-1.25-mRNA-1
CG8468	CG8468	107.3			0	36577	1	augustus_masked-X1.1-abinit-gene-36.2-mRNA-1
CG12866	CG12866	107.4			0	36630	0	NA
CG13907	CG13907	107.5			0	38104	1	augustus_masked-A1.42-abinit-gene-3.3-mRNA-1
CG7910	CG7910	1135.2		(1,2);	1	40956	1	maker-X1.7-snap-gene-57.70-mRNA-1
CG12119	CG12119	108.2			2	31859	0	NA
CG8116	CG8116	1138.1		(1,2);	1	41035	0	NA
CG3091	CG3091	109.2			2	31210	0	NA
CG3823	CG3823	109.3			3	31573	0	NA
CG2924	CG2924	110.1			0	31214	1	snap_masked-Un.16209-abinit-gene-0.19-mRNA-1
CG4502	CG4502	110.2			0	34002	1	maker-A1.35-augustus-gene-3.68-mRNA-1
brother of iHog	boi	114.1		(1,2);	1	31229	1	augustus_masked-A2.7-abinit-gene-1.2-mRNA-1
CG13295	CG13295	111.2			2	38692	1	maker-A1.7-augustus-gene-4.43-mRNA-1
pole hole	phl	112.1			0	31221	2	maker-Un.21950-snap-gene-3.18-mRNA-1,maker-Un.21950-snap-gene-3.16-mRNA-1
kinase suppressor of ras	ksr	112.2			0	40660	0	NA
ribosomal protein L34b	RpL34b	1140.1		(1,2);	1	41120	0	NA
CG4575	CG4575	113.2			2	31637	0	NA
CG9362	CG9362	1142.1		(1,2);	1	41132	0	NA
interference hedgehog	iHog	114.2			2	33972	0	NA
RNA-binding protein S1	RnpS1	1143.1		(1,2);	1	41147	1	maker-A1.23-augustus-gene-4.67-mRNA-1
CG13167	CG13167	115.2			0	36328	0	NA
Vha36	Vha36	115.3			2	44702	0	NA
CG13759	CG13759	116.1			0	31236	1	snap_masked-Un.19322-abinit-gene-8.19-mRNA-1
dopamine N acetyltransferase	Dat	116.2			0	37867	2	augustus_masked-X1Random.8-abinit-gene-15.3-mRNA-1,augustus_masked-A2.3-abinit-gene-7.0-mRNA-1
CG41497	CG41497	1145.8		(((1,2),3),4);	1	5740221	0	NA
CG10881	CG10881	117.2			2	42422	0	NA
CG8310	CG8310	115.1		(1,2);	1	31235	0	NA
tetraspanin 26A	Tsp26A	118.2			2	33838	1	maker-X1Random.8-snap-gene-14.10-mRNA-1
tetraspanin 86D	Tsp86D	118.3			0	41310	0	NA
CG10260	CG10260	119.1			0	31247	1	maker-Un.8878-snap-gene-0.7-mRNA-1+maker-A2.5-augustus-gene-3.70-mRNA-1
phosphotidylinositol 3 kinase 59F	Pi3K59F	119.2			0	37733	1	maker-A2.14-augustus-gene-4.38-mRNA-1
four wheel drive	fwd	119.3			0	45374	1	maker-X1Random.8-snap-gene-1.60-mRNA-1
iron regulatory protein 1B	Irp-1B	1150.1	1	(1,2);	1	41269	3	augustus_masked-X1Random.8-abinit-gene-15.5-mRNA-1,maker-Un.22084-augustus-gene-0.0-mRNA-1,maker-Un.7018-augustus-gene-0.0-mRNA-1
gasket	gskt	120.2			1	318552	0	NA
Pk34A	Pk34A	120.3			2	34705	0	NA
helix loop helix protein 3B	HLH3B	121.1			0	31249	1	maker-X2.7-augustus-gene-4.38-mRNA-1
helix loop helix protein 4C	HLH4C	121.2			0	31397	1	augustus_masked-A2.1-abinit-gene-22.3-mRNA-1
CG6629	CG6629	1154.1		(1,2);	1	41324	0	NA
CG10352	CG10352	122.2			2	32147	0	NA
CG2680	CG2680	122.3			3	31257	0	NA
CG4706	CG4706	1155.1		(1,2);	1	41326	0	NA
CG2694	CG2694	123.2			1	31260	0	NA
CG11322	CG11322	123.3			2	33949	0	NA
CG18547	CG18547	1158.1		((1,2),3);	3	41452	1	augustus_masked-X1Random.10-abinit-gene-4.8-mRNA-1
tiny tim 3	ttm3	124.2			2	35437	0	NA
tiny tim 2	ttm2	124.3			3	38049	0	NA
CG4810	CG4810	1159.1		(1,2);	1	41475	0	NA
Rtf1	Rtf1	125.2			2	37554	1	snap_masked-Un.16785-abinit-gene-0.2-mRNA-1
CG17404	CG17404	1160.1		(((1,2),3),4);	1	41482	0	NA
kin of irre	kirre	126.2			2	31292	1	augustus_masked-A1.46-abinit-gene-5.6-mRNA-1
CG3939	CG3939	127.1			0	31295	0	NA
clot	cl	127.2			0	43938	1	maker-Un.11540-augustus-gene-0.2-mRNA-1
CG10793	CG10793	128.1			0	31308	1	maker-A2.12-augustus-gene-30.59-mRNA-1
vacuolar protein sorting 4	Vps4	128.2			0	32777	1	maker-A1.47-snap-gene-12.22-mRNA-1
katanin p60-like 1	kat-60L1	128.3			0	40715	1	maker-A2.11-augustus-gene-10.102-mRNA-1
katanin 60	katanin-60	128.4			0	53566	1	maker-A2.7-augustus-gene-1.64-mRNA-1
dunce	dnc	129.1			0	31309	2	maker-A1.47-augustus-gene-13.35-mRNA-1,maker-Un.19238-augustus-gene-0.3-mRNA-1
phosphodiesterase 1c	Pde1c	129.2			0	34594	2	maker-Un.15416-snap-gene-0.4-mRNA-1,maker-X1.7-augustus-gene-71.38-mRNA-1
phosphodiesterase 8	Pde8	129.3			0	37741	1	maker-X1Random.1-snap-gene-15.27-mRNA-1
beat-Vc	beat-Vc	1162.1		((1,2),3);	3	41575	0	NA
CG9855	CG9855	130.2			1	40556	0	NA
CG17991	CG17991	130.3			2	43279	0	NA
CG31345	CG31345	1163.1		(1,2);	1	41576	0	NA
CG31559	CG31559	131.2			2	40749	1	maker-A1.29-augustus-gene-10.66-mRNA-1
CG10804	CG10804	132.1			0	31317	1	maker-A1.46-snap-gene-6.23-mRNA-1
CG5226	CG5226	132.2			0	37129	1	maker-Un.18854-snap-gene-0.6-mRNA-2
CG32791	CG32791	133.1			0	31322	1	maker-Un.12318-snap-gene-0.46-mRNA-1
CG14521	CG14521	133.2			0	43417	1	maker-A2.5-snap-gene-2.26-mRNA-1
yellow-f	yellow-f	1165.1		(1,2);	1	41595	0	NA
CG7536	CG7536	134.2			3	32786	1	augustus_masked-Un.23261-abinit-gene-1.0-mRNA-1
CG10481	CG10481	134.3			2	35273	0	NA
CG10483	CG10483	134.4			0	38666	1	maker-X1Random.2-augustus-gene-10.83-mRNA-1
RNA-binding protein 4	Rbp4	1167.1		((1,2),(3,4));	1	41668	0	NA
CG2930	CG2930	135.2			2	31341	3	snap_masked-A1.35-abinit-gene-3.50-mRNA-1,maker-Un.6754-augustus-gene-0.3-mRNA-1,maker-A1.35-augustus-gene-3.62-mRNA-1
CG9444	CG9444	135.3			3	41175	1	maker-Un.16430-augustus-gene-0.32-mRNA-1
VhaAC39	VhaAC39	136.1			0	31342	1	augustus_masked-A1.36-abinit-gene-5.3-mRNA-1
CG4624	CG4624	136.2			0	42739	0	NA
CG42541	CG42541	137.1			0	31344	0	NA
Rgk2	Rgk2	137.2			0	37132	1	maker-A2.1-augustus-gene-19.66-mRNA-1
Rgk1	Rgk1	137.3			0	37219	1	augustus_masked-Un.9406-abinit-gene-0.0-mRNA-1+maker-Un.16430-snap-gene-7.79-mRNA-1
Rgk3	Rgk3	137.4			0	5740446	1	maker-X2.3-augustus-gene-2.27-mRNA-1
empty spiracles	ems	1169.1	1	(1,2);	1	41697	2	maker-X1.7-augustus-gene-8.35-mRNA-1,maker-X1.7-augustus-gene-9.21-mRNA-1
CG8526	CG8526	138.2			2	41208	0	NA
CG6379	CG6379	139.1			0	31355	1	maker-Un.17377-augustus-gene-3.73-mRNA-1
adrift	aft	139.2			0	37034	0	NA
CG3038	CG3038	140.1			0	30970	0	NA
brainiac	brn	140.2			0	31358	1	augustus_masked-X2.1-abinit-gene-4.4-mRNA-1
CG11357	CG11357	140.3			0	38561	0	NA
no receptor potential A	norpA	141.1			0	31376	1	snap_masked-Un.21950-abinit-gene-4.44-mRNA-1
small wing	sl	141.2			0	32601	1	maker-X2.15-snap-gene-1.14-mRNA-1
phospholipase C at 21C	Plc21C	141.3			0	33204	1	augustus_masked-A1.3-abinit-gene-9.0-mRNA-1
ruby	rb	142.1			0	31381	1	maker-A2.12-augustus-gene-25.79-mRNA-1
beta adaptin	Bap	142.2			0	32987	1	snap_masked-A2.12-abinit-gene-22.25-mRNA-1
CG8636	CG8636	117.1		(1,2);	1	31243	1	snap_masked-Un.16735-abinit-gene-0.7-mRNA-1
CG9308	CG9308	143.2			2	37507	0	NA
CG2574	CG2574	1174.1		(((3,4),5),6);	3	32190	0	NA
rhythmically expressed gene 2	Reg-2	144.2			2	38075	0	NA
CG9602	CG9602	1174.13		(7,8);	7	41682	0	NA
CG4438	CG4438	145.2			2	34257	0	NA
bendless	ben	1174.9		(1,2);	1	32358	1	maker-X2.16-snap-gene-14.78-mRNA-1
CG15708	CG15708	146.2			2	36805	0	NA
CG7026	CG7026	1176.1		(1,2);	1	41806	0	NA
CG12179	CG12179	147.2			2	31393	1	augustus_masked-X1Random.8-abinit-gene-30.13-mRNA-1
CG3009	CG3009	148.1			0	31402	2	maker-Un.23592-snap-gene-1.41-mRNA-1,snap_masked-A1.32-abinit-gene-12.82-mRNA-1
GIIIspla2	GIIIspla2	148.2			0	31747	1	maker-A1.40-snap-gene-1.46-mRNA-1
CG42237	CG42237	148.3			0	32261	1	augustus_masked-A1.33-abinit-gene-6.5-mRNA-1
cut up	ctp	149.1			0	31405	1	augustus_masked-Un.17272-abinit-gene-2.1-mRNA-1
cytoplasmic dynein light chain 2	Cdlc2	149.2			0	33319	0	NA
CG8407	CG8407	149.3			0	36303	1	maker-X2.3-snap-gene-14.7-mRNA-1
guanylyl cyclase at 89Da	Gyc-89Da	1177.2		(1,2);	1	42001	0	NA
CG7024	CG7024	150.2			2	31407	0	NA
CG8199	CG8199	150.3			0	41149	1	maker-A2.8-augustus-gene-0.86-mRNA-1
proctolin receptor	Proc-R	151.1			0	31408	1	maker-A2.5-augustus-gene-2.24-mRNA-1
CG33696	CG33696	151.2			0	39127	1	maker-X1Random.1-augustus-gene-12.44-mRNA-1
CG6687	CG6687	1178.1		(1,2);	1	41829	0	NA
CG7589	CG7589	152.2			2	39949	0	NA
CG11340	CG11340	152.3			3	43703	0	NA
tetraspanin 3A	Tsp3A	118.1		(1,2);	1	31244	1	augustus_masked-A2.1-abinit-gene-19.5-mRNA-1
protein tyrosine phosphatase 10D	Ptp10D	153.2			2	32115	1	maker-A1.29-snap-gene-10.74-mRNA-1
CG7180	CG7180	153.3			0	35091	1	maker-X2.3-augustus-gene-13.44-mRNA-1
bric a brac 1	bab1	1182.20		(1,2);	1	38116	1	maker-X1Random.10-augustus-gene-9.30-mRNA-1
CG13349	CG13349	154.2			2	36545	2	maker-Un.21403-augustus-gene-1.24-mRNA-1,augustus_masked-X2.1-abinit-gene-4.1-mRNA-1
CG15786	CG15786	155.1			0	31438	1	maker-A1.45-augustus-gene-9.24-mRNA-1
rhodopsin 6	Rh6	1183.1		((1,2),3);	3	41889	1	maker-Un.19572-augustus-gene-0.3-mRNA-1
CG42598	CG42598	155.3			2	8674042	1	augustus_masked-A2.1-abinit-gene-19.2-mRNA-1
CG18522	CG18522	1184.2		(((1,2),3),4);	3	41894	0	NA
deadhead	dhd	156.2			2	31444	0	NA
thioredoxin-2	Trx-2	156.3			4	34281	0	NA
Thioredoxin-like	Txl	156.4			0	38646	1	augustus_masked-A2.9-abinit-gene-19.1-mRNA-1
CG13473	CG13473	156.5			3	39603	0	NA
minichromosome maintenance 3	Mcm3	157.1			0	31449	1	maker-X1.7-snap-gene-28.46-mRNA-1
minichromosome maintenance 6	Mcm6	157.2			0	31603	1	augustus_masked-A1Random.58-abinit-gene-0.3-mRNA-1
disc proliferation abnormal	dpa	157.3			0	35679	1	snap_masked-X2.17-abinit-gene-1.26-mRNA-1
minichromosome maintenance 7	Mcm7	157.4			0	39014	1	augustus_masked-X1Random.8-abinit-gene-8.0-mRNA-1
minichromosome maintenance 2	Mcm2	157.5			0	40973	1	maker-X1Random.8-snap-gene-7.72-mRNA-1
minichromosome maintenance 5	Mcm5	157.6			0	41296	1	snap_masked-X1.7-abinit-gene-70.50-mRNA-1
inactivation no afterpotential C	inaC	1185.3		(1,2);	1	36897	0	NA
CG16799	CG16799	158.2			1	37340	0	NA
CG11159	CG11159	158.3			2	37341	1	maker-X2.17-augustus-gene-5.76-mRNA-1
Sex peptide receptor	SPR	159.1			0	31463	0	NA
CG13229	CG13229	159.2			0	36168	1	maker-X2.8-snap-gene-21.44-mRNA-1
Sex combs reduced	Scr	1186.3		(1,2);	1	40833	1	maker-A1.1-augustus-gene-5.11-mRNA-1
dromyosuppressin receptor 1	DmsR-1	159.4			2	38298	0	NA
zerknullt-related	zen2	1186.31		((3,4),5);	3	40827	0	NA
Vsx1	Vsx1	160.2			2	31470	0	NA
CG3678	CG3678	1187.1		(1,2);	1	42045	0	NA
CG17237	CG17237	161.2			2	33411	0	NA
calmodulin	Cam	161.3			0	36329	2	maker-X1.1-augustus-gene-33.69-mRNA-1,augustus_masked-Un.17377-abinit-gene-3.0-mRNA-1
CG17272	CG17272	161.4			0	42465	1	augustus_masked-X1.7-abinit-gene-94.8-mRNA-1
androcam	And	161.5			0	44913	0	NA
Ecdysone-induced protein 63F 1	Eip63F-1	161.6			0	47878	1	maker-X1Random.2-snap-gene-22.104-mRNA-1
CG4096	CG4096	162.1			0	31490	1	augustus_masked-Un.23592-abinit-gene-0.1-mRNA-1
CG6232	CG6232	162.3			0	34435	1	maker-A1.3-snap-gene-1.61-mRNA-1
CG31619	CG31619	162.4			0	35424	1	augustus_masked-A1.46-abinit-gene-7.7-mRNA-1+snap_masked-A1.46-abinit-gene-7.42-mRNA-1
papilin	Ppn	162.5			0	43872	1	augustus_masked-X1Random.2-abinit-gene-4.4-mRNA-1
CG32758	CG32758	163.1			0	31493	1	augustus_masked-Un.2628-abinit-gene-0.1-mRNA-1+maker-Un.23592-augustus-gene-0.18-mRNA-1
prosap	Prosap	163.2			0	50225	1	maker-X1.4-snap-gene-6.28-mRNA-1
beaten path Ib	beat-Ib	1189.1		((1,2),3);	3	34939	0	NA
CG42264	CG42264	164.2			2	31504	0	NA
CG3108	CG3108	164.3			3	31506	1	maker-A2.1-augustus-gene-5.59-mRNA-1
beat-IIb	beat-IIb	1189.4		(4,5);	4	42082	0	NA
proteasome beta2 subunit	Prosbeta2	165.2			3	39628	1	maker-A2.1-augustus-gene-3.70-mRNA-1
proteasome beta2R2 subunit	Prosbeta2R2	165.3			2	40621	0	NA
CG4686	CG4686	1196.1		(1,2);	1	42361	0	NA
CG8979	CG8979	166.2			2	36277	4	maker-X1.7-augustus-gene-4.44-mRNA-1,maker-A2.14-augustus-gene-2.32-mRNA-1,snap_masked-Un.859-abinit-gene-0.6-mRNA-1,maker-Un.22202-snap-gene-0.4-mRNA-1
mediator complex subunit 25	MED25	1198.1	1	(1,2);	1	42385	2	snap_masked-A2.11-abinit-gene-8.50-mRNA-1,maker-A2.11-snap-gene-7.22-mRNA-1
Actin-related protein 66B	Arp66B	167.2			0	38898	2	augustus_masked-X1.7-abinit-gene-60.4-mRNA-1,maker-X1.7-snap-gene-60.5-mRNA-1
actin 79B	Act79B	167.3			4	40444	0	NA
Actin-related protein 87C	Arp87C	167.4			0	41566	1	maker-A2.7-augustus-gene-0.44-mRNA-1
actin 88F	Act88F	167.5			5	41885	0	NA
actin 87E	Act87E	167.6			0	48632	0	NA
Actin-related protein 14D	Arp14D	167.7			0	32623	1	maker-A1.46-snap-gene-1.58-mRNA-2
actin 42A	Act42A	167.8			2	35526	0	NA
Actin-related protein 53D	Arp53D	167.9			3	36879	0	NA
brahma associated protein 55kD	Bap55	167.10			0	36956	1	maker-X2.13-augustus-gene-2.80-mRNA-1
actin 57B	Act57B	167.12			0	37368	2	maker-X1.7-augustus-gene-64.44-mRNA-1,maker-Un.10263-augustus-gene-0.0-mRNA-1
CG4766	CG4766	168.1			0	31533	0	NA
mab-21	mab-21	168.2			0	44127	1	maker-A1.47-augustus-gene-6.72-mRNA-1
CG4666	CG4666	169.1			0	31541	1	maker-X2.11-snap-gene-0.21-mRNA-1
CG4660	CG4660	169.2			0	31542	0	NA
neprilysin 1	Nep1	170.1			0	31547	1	snap_masked-A1.32-abinit-gene-6.83-mRNA-1
neprilysin 4	Nep4	170.2			0	42449	1	maker-A1.38-augustus-gene-0.17-mRNA-1
CG4367	CG4367	1199.1		(1,2);	1	42409	0	NA
CG14511	CG14511	171.2			2	43445	0	NA
spaghetti squash	sqh	172.1			0	31554	1	maker-A1.33-snap-gene-8.30-mRNA-2
CG33098	CG33098	172.2			0	326253	0	NA
myosin light chain 2	Mlc2	172.3			0	43587	1	maker-X1.7-augustus-gene-8.32-mRNA-1
CG30036	CG30036	12.1	1	((1,2),3);	1	246408	2	maker-Un.17776-augustus-gene-0.6-mRNA-1,augustus_masked-X1Random.2-abinit-gene-5.2-mRNA-1
CG6870	CG6870	173.2			0	35067	1	augustus_masked-A1.12-abinit-gene-4.0-mRNA-1
Cyt-b5	Cyt-b5	173.3			0	35688	1	maker-A2.12-snap-gene-21.16-mRNA-1
CG5157	CG5157	173.4			2	39771	1	snap_masked-X2.13-abinit-gene-13.23-mRNA-1
topoisomerase 3beta	Top3beta	174.1			0	31565	1	maker-A2.8-snap-gene-3.69-mRNA-1
topoisomerase 3alpha	Top3alpha	174.2			0	35236	0	NA
shaggy	sgg	120.1		((1,2),3);	3	31248	0	NA
Rpt4R	Rpt4R	175.2			2	39351	0	NA
knockdown	kdn	176.1			0	31579	1	maker-A2.9-snap-gene-6.3-mRNA-1
CG14740	CG14740	176.2			0	41468	0	NA
Septin-2	Sep2	1200.1	1	(1,2);	1	42438	2	maker-Un.1540-snap-gene-0.26-mRNA-1,maker-Un.16098-snap-gene-0.4-mRNA-1
fuzzy onions	fzo	177.2			2	42745	0	NA
protein phosphatase V	PpV	178.1			0	31582	0	NA
protein phosphatase 19C	Pp4-19C	178.2			0	45031	1	augustus_masked-Un.14103-abinit-gene-0.2-mRNA-1
microtubule star	mts	178.3			0	45959	1	augustus_masked-Un.16534-abinit-gene-1.5-mRNA-1
CG7907	CG7907	1202.1		(1,2);	1	42539	0	NA
copper transporter 1B	Ctr1B	179.2			1	40989	0	NA
copper transporter 1C	Ctr1C	179.3			2	43668	0	NA
CG3198	CG3198	180.1			0	31602	1	maker-A2.1-snap-gene-18.75-mRNA-1
CG7564	CG7564	180.2			0	39956	1	maker-A2Random.1-augustus-gene-5.70-mRNA-1
ladybird late	lbl	1203.1		(1,2);	1	42541	0	NA
CG4095	CG4095	181.2			2	31606	0	NA
CG6140	CG6140	181.3			3	39281	0	NA
CG31163	CG31163	1206.1	1	(1,2);	1	42601	4	maker-A1.29-snap-gene-6.1-mRNA-1,maker-A1.29-augustus-gene-7.41-mRNA-1,maker-A1.29-augustus-gene-6.26-mRNA-1,maker-Un.16253-augustus-gene-0.0-mRNA-1
CG14440	CG14440	182.2			2	31610	0	NA
C3G	C3G	183.1			0	31618	0	NA
Gef26	Gef26	183.2			0	33881	1	maker-Un.4619-augustus-gene-2.52-mRNA-1
epac	Epac	183.3			0	35588	3	maker-X2.17-snap-gene-21.7-mRNA-1,maker-X2.17-snap-gene-21.8-mRNA-1+maker-Un.17677-augustus-gene-0.5-mRNA-1,maker-X2.17-snap-gene-21.11-mRNA-1
pod1	pod1	184.1			0	31620	1	augustus_masked-A1.47-abinit-gene-8.13-mRNA-1
coro	coro	184.2			0	35596	1	snap_masked-A1Random.118-abinit-gene-1.27-mRNA-1
inactive	iav	185.1			0	31621	1	augustus_masked-A2.12-abinit-gene-28.2-mRNA-1
nanchung	nan	185.2			0	39571	1	snap_masked-Un.22713-abinit-gene-1.37-mRNA-1
nuclear factor Y-box C	Nf-YC	186.1			0	31622	0	NA
Mes4	Mes4	186.2			0	37560	0	NA
CG4542	CG4542	187.1			0	31623	1	augustus_masked-X2Random.32-abinit-gene-1.8-mRNA-1
CG5091	CG5091	187.2			0	34409	1	maker-Un.17476-augustus-gene-0.3-mRNA-1
Smg1	Smg1	188.1			0	31625	1	maker-A1.29-augustus-gene-14.44-mRNA-1
meiotic 41	mei-41	188.2			0	32608	1	maker-X1Random.2-augustus-gene-16.94-mRNA-1
CG4607	CG4607	189.1			0	31653	0	NA
CG8249	CG8249	189.2			0	36742	1	maker-A1Random.66-snap-gene-8.38-mRNA-1
CG5379	CG5379	1207.1		((((1,2),3),4),5);	4	42625	0	NA
CG14717	CG14717	190.2			2	41412	0	NA
phosphoglyceromutase	Pglym78	1208.2		(1,2);	1	43447	0	NA
CG12091	CG12091	191.2			2	38177	1	maker-A1.33-snap-gene-10.4-mRNA-1+maker-A1.33-snap-gene-10.3-mRNA-1
fos intronic gene	fig	191.3			3	43511	0	NA
CG9657	CG9657	192.1			0	31674	0	NA
CG6723	CG6723	192.2			0	41368	1	snap_masked-A2.9-abinit-gene-12.54-mRNA-1
CG42235	CG42235	192.3			0	43136	0	NA
CG1402	CG1402	193.1			0	31687	0	NA
CG32698	CG32698	193.2			0	31915	1	maker-A1.10-augustus-gene-2.19-mRNA-1
CG4393	CG4393	1212.1		(1,2);	1	42764	1	augustus_masked-A1Random.37-abinit-gene-1.6-mRNA-1+maker-A1Random.37-snap-gene-1.39-mRNA-1
mitochondrial carrier homolog 1	Mtch	194.2			2	38026	0	NA
CG13822	CG13822	1213.3		(1,2);	1	42787	0	NA
black pearl	blp	195.2			2	41937	1	maker-A2.10-snap-gene-2.32-mRNA-1
CG10932	CG10932	196.1			0	31695	1	augustus_masked-X2.17-abinit-gene-5.7-mRNA-1
yippee interacting protein 2	yip2	196.2			0	34313	1	maker-Un.10227-snap-gene-0.38-mRNA-1
CG9149	CG9149	196.3			0	38147	1	augustus_masked-A2.9-abinit-gene-5.12-mRNA-1
eukaryotic translation initiation factor 4G2	eIF4G2	1217.1		(1,2);	1	42819	0	NA
nimA-like kinase	niki	197.2			2	42959	0	NA
dpr14	dpr14	198.1			0	31702	1	maker-X2Random.25-snap-gene-0.10-mRNA-1
dpr18	dpr18	198.2			0	32572	1	augustus_masked-Un.2168-abinit-gene-0.0-mRNA-1
dpr20	dpr20	198.3			0	38101	1	maker-A2.12-snap-gene-16.89-mRNA-1
CG1444	CG1444	199.1			0	31703	4	augustus_masked-A1.36-abinit-gene-5.9-mRNA-1,augustus_masked-A2.13-abinit-gene-9.0-mRNA-1,snap_masked-A1.29-abinit-gene-17.6-mRNA-1,snap_masked-A1.29-abinit-gene-17.12-mRNA-1
CG13601	CG13601	1218.1		(1,2);	1	42826	1	maker-X1Random.2-snap-gene-16.109-mRNA-1
CG31810	CG31810	199.3			2	318955	0	NA
CG13284	CG13284	199.4			3	35021	1	maker-A1.29-snap-gene-9.92-mRNA-1
CG6012	CG6012	199.5			4	35022	0	NA
adenomatous polyposis coli tumor suppressor homolog 2	Apc2	1219.1		(1,2);	1	42871	0	NA
CG31664	CG31664	200.2			2	33359	0	NA
CG15739	CG15739	122.1		((1,2),3);	1	32146	0	NA
CG10859	CG10859	201.2			2	34756	0	NA
CG6053	CG6053	201.3			0	39318	2	maker-A1.33-augustus-gene-0.12-mRNA-1,maker-A1.26-snap-gene-0.39-mRNA-1
CG2254	CG2254	202.1			0	31726	0	NA
CG14946	CG14946	202.2			0	34627	0	NA
CG30417	CG30417	1221.1		(((1,2),3),4);	3	246604	0	NA
CG14739	CG14739	203.2			2	41467	0	NA
smad on X	Smox	204.1			0	31738	0	NA
mothers against dpp	Mad	204.2			0	33529	2	maker-A1.15-snap-gene-4.5-mRNA-1,snap_masked-A1.15-abinit-gene-4.30-mRNA-1
daughters against dpp	Dad	204.3			0	42059	1	snap_masked-X1Random.8-abinit-gene-3.20-mRNA-1
medea	Med	204.4			0	43725	1	maker-A2.12-snap-gene-6.12-mRNA-1
Gbeta5	Gbeta5	205.1			0	31744	0	NA
G protein beta-subunit 13F	Gbeta13F	205.2			0	32544	1	augustus_masked-X1.1-abinit-gene-34.5-mRNA-1
G protein beta-subunit 76C	Gbeta76C	205.3			0	40148	0	NA
CG12333	CG12333	205.4			0	42218	1	maker-X1.7-augustus-gene-92.81-mRNA-1
CG5768	CG5768	1222.1		(1,2);	1	42915	1	augustus_masked-A2.9-abinit-gene-3.7-mRNA-1
thioredoxin reductase 2	Trxr-2	206.2			2	40475	0	NA
TATA box binding protein-related factor 2	Trf2	207.1			0	31773	1	maker-A1.41-snap-gene-11.9-mRNA-1
TBP-related factor	Trf	207.2			0	34102	1	augustus_masked-A1Random.118-abinit-gene-4.16-mRNA-1
TATA binding protein	Tbp	207.3			0	37476	0	NA
tolkin	tok	1226.1	1	(1,2);	1	42944	3	maker-X1Random.8-snap-gene-31.43-mRNA-1,snap_masked-Un.10998-abinit-gene-0.14-mRNA-1,maker-X1Random.8-augustus-gene-16.93-mRNA-1
CG13423	CG13423	208.2			2	37315	0	NA
bifid	bi	209.1			0	31379	0	NA
optomotor-blind-related-gene-1	org-1	209.2			0	31778	1	maker-A2.12-augustus-gene-34.71-mRNA-1
H15	H15	209.3			0	33769	0	NA
midline	mid	209.4			0	33770	1	maker-A1.15-augustus-gene-6.40-mRNA-1
CG14814	CG14814	123.1		((1,2)3,);	3	31139	1	maker-A1.46-augustus-gene-25.64-mRNA-1
Dorsocross2	Doc2	209.6			1	39038	0	NA
Dorsocross1	Doc1	209.7			2	39039	1	snap_masked-X1.7-abinit-gene-110.26-mRNA-1
brachyenteron	byn	209.8			0	39349	1	maker-Un.20744-snap-gene-1.46-mRNA-1
CG17287	CG17287	1230.19		(1,2);	1	36939	0	NA
CG18787	CG18787	210.2			2	59163	0	NA
Zyx102EF	Zyx102EF	211.1			0	317824	1	maker-X2.13-augustus-gene-8.41-mRNA-1
CG11063	CG11063	211.2			0	32351	0	NA
CG4483	CG4483	1230.25		(3,4);	3	39057	0	NA
lethal (1) G0156	l(1)G0156	212.2			3	32940	1	maker-X1Random.38-snap-gene-0.25-mRNA-1
CG3483	CG3483	212.3			2	37900	0	NA
CG6439	CG6439	212.4			0	42586	1	augustus_masked-X1Random.1-abinit-gene-2.25-mRNA-1
CG5028	CG5028	212.5			0	43102	1	augustus_masked-Un.17366-abinit-gene-0.2-mRNA-1
Lgr3	Lgr3	1231.1		(1,2);	1	43098	1	maker-A2.1-snap-gene-8.62-mRNA-1
elongase 68beta	Elo68beta	213.2			2	39245	0	NA
CG5886	CG5886	1232.1		(1,2);	1	43125	0	NA
CG6737	CG6737	214.2			3	34482	0	NA
CG9013	CG9013	214.3			4	36900	0	NA
Vha16-2	Vha16-2	214.4			2	39282	0	NA
vacuolar H[+] ATPase 16kD subunit	Vha16	214.5			5	44307	1	maker-Un.17174-augustus-gene-0.4-mRNA-1
aldolase	Ald	1234.1		(1,2);	1	43183	1	maker-Un.16006-augustus-gene-0.37-mRNA-1
CG32154	CG32154	215.2			2	39778	0	NA
hemomucin	Hmu	1236.1		(1,2);	1	43294	1	maker-X1Random.8-augustus-gene-5.58-mRNA-1
CG3251	CG3251	216.2			2	33671	0	NA
CG5844	CG5844	1237.4		(1,2);	1	41533	1	maker-X1Random.1-snap-gene-5.65-mRNA-1
CG8646	CG8646	217.2			0	36394	1	augustus_masked-X2.8-abinit-gene-7.3-mRNA-1
CG7408	CG7408	217.4			1	39991	0	NA
CG7402	CG7402	217.5			2	39994	1	maker-X1Random.2-snap-gene-10.18-mRNA-1
males absent on the first	mof	1239.2		(1,2);	1	31518	1	maker-X1Random.8-snap-gene-21.6-mRNA-1
CG4306	CG4306	218.2			2	40017	0	NA
CG32260	CG32260	219.1			0	317943	0	NA
CG1299	CG1299	219.2			0	38496	1	snap_masked-A2.7-abinit-gene-9.19-mRNA-1
tiny tim 50	ttm50	124.1		((1,2),3);	1	31266	1	maker-A2.11-augustus-gene-6.63-mRNA-1
Trf4-2	Trf4-2	220.2			2	42983	0	NA
allatostatin C receptor 2	AlCR2	1240.1	1	(1,2);	1	40019	2	snap_masked-Un.22713-abinit-gene-3.19-mRNA-1,maker-A2.13-augustus-gene-4.25-mRNA-1
CG13559	CG13559	221.2			2	37720	0	NA
CG33791	CG33791	222.1			0	317974	0	NA
neural conserved at 73EF	Nc73EF	222.2			0	39899	1	maker-X2.8-augustus-gene-23.66-mRNA-1
CG1544	CG1544	222.3			0	43689	0	NA
CG7802	CG7802	1243.1		((1,2),3);	3	43523	1	maker-X1Random.1-augustus-gene-12.42-mRNA-1
CG6845	CG6845	223.2			2	38019	0	NA
CG7911	CG7911	1245.1		(1,2);	1	43559	1	snap_masked-A1.36-abinit-gene-5.66-mRNA-1
CG31907	CG31907	224.2			4	319019	0	NA
CG15306	CG15306	224.3			5	31961	0	NA
CG2955	CG2955	224.4			6	33622	0	NA
Eb1	Eb1	224.5			1	35584	1	maker-Un.16669-augustus-gene-0.3-mRNA-1+maker-X2.13-snap-gene-4.12-mRNA-1
CG18190	CG18190	224.6			3	37179	0	NA
prolyl-4-hydroxylase-alpha SG1	PH4alphaSG1	1246.1		((((1,2),3),4),5);	4	326112	0	NA
CG7526	CG7526	225.2			2	38850	1	maker-X1Random.3-augustus-gene-3.60-mRNA-1
CG1340	CG1340	1247.1		(1,2);	1	43645	0	NA
CG32412	CG32412	226.2			2	38663	0	NA
Niemann-Pick type C-2g	Npc2g	1248.1		(1,2);	1	43648	1	maker-X2.4-augustus-gene-4.67-mRNA-1
CG5976	CG5976	226.4			4	40270	2	maker-A1.22-augustus-gene-1.43-mRNA-1,maker-Un.22582-augustus-gene-0.48-mRNA-1
CG11284	CG11284	227.1			0	31804	1	maker-Un.438-snap-gene-1.62-mRNA-1
carbonic anhydrase 1	CAH1	227.2			0	34786	0	NA
carbonic anhydrase 2	CAH2	227.3			0	39390	1	maker-X2.3-augustus-gene-14.61-mRNA-1
CG11318	CG11318	1249.1		(1,2);	1	43678	0	NA
endonuclease G	EndoG	228.2			3	36309	0	NA
CG4683	CG4683	228.3			2	41321	0	NA
CG12498	CG12498	125.1		(1,2);	1	31272	0	NA
CG31823	CG31823	229.2			3	326163	0	NA
CG31821	CG31821	229.3			4	34938	0	NA
CG3344	CG3344	229.4			2	38083	0	NA
CG1635	CG1635	1250.1		((1,2),3);	1	43720	1	maker-Un.20633-augustus-gene-1.40-mRNA-1
CG1695	CG1695	230.2			2	33046	1	maker-A2Random.62-augustus-gene-10.34-mRNA-1
cannonball	can	1258.4		(1,2);	1	45432	0	NA
CG32847	CG32847	231.2			3	318245	0	NA
CG8974	CG8974	231.3			2	32532	1	snap_masked-X2.13-abinit-gene-7.35-mRNA-1
moesin	Moe	232.1			0	31816	1	snap_masked-A1.41-abinit-gene-2.24-mRNA-1
merlin	Mer	232.2			0	32979	1	augustus_masked-X1.7-abinit-gene-88.4-mRNA-1
enhancer of yellow 2	e(y)2	1259.1	1	(1,2);	1	45848	2	snap_masked-A2.13-abinit-gene-2.26-mRNA-1,snap_masked-A2.13-abinit-gene-2.24-mRNA-1
CG10993	CG10993	233.2			3	32344	0	NA
CG40813	CG40813	233.3			1	5740386	0	NA
CG41562	CG41562	233.4			2	5740411	0	NA
roughest	rst	126.1		(1,2);	1	31290	0	NA
CG9589	CG9589	234.2			2	41908	0	NA
CG2577	CG2577	1262.1		(1,2);	1	32188	0	NA
pickpocket 28	ppk28	235.2			3	32671	1	snap_masked-Un.19322-abinit-gene-2.24-mRNA-1
pickpocket 12	ppk12	235.3			2	37566	0	NA
CG15403	CG15403	1263.2		(1,2);	1	33527	0	NA
CG5323	CG5323	236.2			1	37137	1	augustus_masked-Un.8363-abinit-gene-0.0-mRNA-1
CG5327	CG5327	236.3			2	37138	0	NA
CG17193	CG17193	1264.1		(1,2);	1	50044	0	NA
CG12951	CG12951	237.2			1	41110	0	NA
CG16749	CG16749	237.3			2	41111	0	NA
ocnus	ocn	1266.1		(((1,2),3),4);	1	43567	0	NA
CG9396	CG9396	238.2			1	41156	0	NA
CG9399	CG9399	238.3			2	41157	0	NA
protein phosphatase 1 at 13C	Pp1-13C	1268.11		((1,2),3);	1	48531	0	NA
dodo	dod	239.2			2	33111	2	augustus_masked-A1.27-abinit-gene-4.6-mRNA-1,augustus_masked-A1.27-abinit-gene-4.12-mRNA-1
robl22E	robl22E	1269.1		(((1,2),(3,4)),5);	1	33412	0	NA
CG15449	CG15449	240.2			2	33079	1	maker-A1.47-augustus-gene-5.72-mRNA-1
CG7033	CG7033	241.1			0	31838	1	augustus_masked-A2Random.62-abinit-gene-2.10-mRNA-1
T-cp1zeta	Tcp-1zeta	241.2			0	32518	1	snap_masked-Un.17272-abinit-gene-2.37-mRNA-1
CG5525	CG5525	241.3			0	34674	1	maker-A1.41-augustus-gene-13.49-mRNA-1
T-complex chaperonin 5	Cct5	241.4			0	36308	1	maker-Un.8801-snap-gene-1.38-mRNA-1
Tcp-1eta	Tcp-1eta	241.5			0	41054	1	snap_masked-A1.3-abinit-gene-6.48-mRNA-1
cctgamma	Cctgamma	241.6			0	42029	1	maker-A2.9-snap-gene-12.13-mRNA-1
Tcp1-like	T-cp1	241.7			0	42649	1	maker-Un.1441-augustus-gene-0.8-mRNA-1
CG7766	CG7766	242.1			0	31839	1	maker-A1.29-snap-gene-10.79-mRNA-1
CG8475	CG8475	242.2			0	34114	1	snap_masked-Un.16360-abinit-gene-0.2-mRNA-1
CG34184	CG34184	1270.1		(((1,2),3),4);	1	5740423	0	NA
histone H3.3A	His3.3A	243.2			2	33736	0	NA
klhl10	klhl10	1271.2		(1,2);	1	3354863	1	augustus_masked-A1.41-abinit-gene-5.4-mRNA-1
histone H3	His3:CG33863	243.4			3	3772173	0	NA
histone H3	His3:CG33866	243.5			4	3772189	0	NA
CG31019	CG31019	244.1			0	318558	1	maker-Un.21950-snap-gene-4.17-mRNA-1
CG32627	CG32627	244.2			0	32329	1	maker-A1.41-snap-gene-17.52-mRNA-2
CG32164	CG32164	1273.1		(1,2);	1	59215	1	maker-Un.17858-augustus-gene-0.4-mRNA-1+maker-Un.549-augustus-gene-0.16-mRNA-1
CG12200	CG12200	245.2			2	32932	0	NA
CG31065	CG31065	246.1			0	318575	0	NA
pickpocket 13	ppk13	246.2			0	3346226	1	snap_masked-A1.23-abinit-gene-4.34-mRNA-1
CG31076	CG31076	247.1			0	318582	0	NA
CG40188	CG40188	1274.1		((1,2),3);	1	3354934	0	NA
misexpression suppressor of KSR 4	MESK4	247.3			2	64872	0	NA
CG30059	CG30059	13.1		(1,2);	1	246425	1	maker-A2.1-augustus-gene-21.133-mRNA-1
CG17826	CG17826	248.2			2	39354	0	NA
CG16781	CG16781	130.1		((1,2),3);	3	31315	0	NA
CG4802	CG4802	249.2			2	36955	1	maker-X2.10-augustus-gene-5.8-mRNA-1
CG15368	CG15368	250.1			0	31861	0	NA
CG33936	CG33936	250.2			0	41114	0	NA
CG12206	CG12206	131.1		(1,2);	1	31316	0	NA
CG42335	CG42335	251.2			2	42558	0	NA
CG13806	CG13806	1321.1		(1,2);	1	38292	0	NA
alpha mannosidase I	alpha-Man-I	252.2			2	31957	2	maker-A1.47-augustus-gene-12.101-mRNA-1,snap_masked-Un.16430-abinit-gene-7.30-mRNA-1
CG11874	CG11874	252.3			0	43436	1	maker-X1Random.1-augustus-gene-10.21-mRNA-1
CG31251	CG31251	253.1			0	318645	0	NA
nudC	nudC	253.2			0	39879	1	maker-X2.17-snap-gene-20.85-mRNA-1
CG3893	CG3893	1329.1		((1,2),3);	3	40061	0	NA
CG33124	CG33124	254.2			1	318891	0	NA
CG31668	CG31668	254.3			2	33395	0	NA
CG8451	CG8451	254.4			4	34117	1	maker-Un.17377-snap-gene-5.48-mRNA-1
CG2901	CG2901	134.1		((1,2),3);	1	31338	0	NA
CG6980	CG6980	255.2			4	42955	0	NA
CG34274	CG34274	255.3			2	5740212	0	NA
CG34297	CG34297	255.4			3	5740802	0	NA
ionotropic receptor 8a	Ir8a	256.1			0	31867	1	maker-Un.18065-snap-gene-0.1-mRNA-1
ionotropic receptor 25a	Ir25a	256.2			0	33683	2	maker-Un.16431-snap-gene-0.1-mRNA-1,maker-Un.16386-snap-gene-0.18-mRNA-1
yin	yin	135.1		((1,2),3);	1	31340	0	NA
CG31278	CG31278	257.2			2	41282	0	NA
downstream of raf1	Dsor1	258.1			0	31872	1	maker-A2.6-snap-gene-1.83-mRNA-1
licorne	lic	258.2			0	32257	1	maker-A1.29-snap-gene-1.98-mRNA-1
MAP kinase kinase 4	Mkk4	258.3			0	41020	1	augustus_masked-A2.1-abinit-gene-21.7-mRNA-1
larval serum protein 2	Lsp2	1355.1	1	(((1,2),3),4);	4	45326	2	maker-Un.15996-snap-gene-0.0-mRNA-1,maker-Un.549-snap-gene-1.8-mRNA-1
CG4670	CG4670	259.2			4	36464	1	maker-X2.16-snap-gene-5.6-mRNA-1+maker-Un.19372-snap-gene-0.4-mRNA-1
CG6690	CG6690	259.3			1	42582	0	NA
CG17843	CG17843	259.4			2	42583	0	NA
CG6428	CG6428	138.1	1	(1,2);	1	31351	2	augustus_masked-X2.3-abinit-gene-9.4-mRNA-1,maker-Un.12797-augustus-gene-0.0-mRNA-1
CG31148	CG31148	260.2			2	42796	0	NA
CG30075	CG30075	14.1		(1,2);	1	246437	0	NA
TGF-beta activated kinase 1	Tak1	261.2			3	39659	1	maker-A1.36-augustus-gene-3.17-mRNA-1
Tak1-like 2	Takl2	261.3			2	42692	0	NA
CHOp24	CHOp24	143.1		(1,2);	1	31382	0	NA
CG11737	CG11737	262.2			1	41009	1	augustus_masked-X1.1-abinit-gene-0.1-mRNA-1
CG31259	CG31259	262.3			2	41010	0	NA
CG15912	CG15912	144.1		(1,2);	1	31385	0	NA
CG31391	CG31391	263.2			2	41280	0	NA
CG14689	CG14689	263.3			3	41283	0	NA
CG11444	CG11444	145.1		(1,2);	1	31388	1	maker-Un.16803-snap-gene-0.5-mRNA-2
CG31472	CG31472	264.2			2	40925	1	maker-Un.13898-augustus-gene-0.0-mRNA-1
CG12684	CG12684	146.1		(1,2);	1	31390	0	NA
CG17446	CG17446	265.2			2	31880	1	maker-A2.1-augustus-gene-0.57-mRNA-1
dumpy	dp	266.1			0	318824	2	maker-A1.45-snap-gene-3.34-mRNA-1,maker-A1.45-augustus-gene-3.32-mRNA-1
CG9572	CG9572	266.2			0	33013	1	augustus_masked-Un.8141-abinit-gene-1.7-mRNA-1
lozenge	lz	267.1			0	31883	1	maker-A1.36-augustus-gene-4.90-mRNA-1
RunxB	RunxB	267.2			0	33051	0	NA
runt	run	267.3			0	33059	1	maker-A1.36-augustus-gene-2.32-mRNA-1
RunxA	RunxA	267.4			0	4379817	1	augustus_masked-A1.36-abinit-gene-2.4-mRNA-1+maker-A1.36-snap-gene-2.36-mRNA-1
CG12184	CG12184	147.1		(1,2);	1	31392	0	NA
histone H4	His4:CG33871	268.2			2	3772708	0	NA
histone H4 replacement	His4r	268.3			3	41773	0	NA
CG30093	CG30093	15.1		(1,2);	1	246451	0	NA
histone H2A	His2A:CG33862	269.2			2	3772278	0	NA
histone H2A	His2A:CG33865	269.3			1	3772505	0	NA
histone H2A variant	His2Av	269.4			0	43229	0	NA
CG34449	CG34449	270.1			0	31887	1	maker-A1.41-augustus-gene-11.58-mRNA-1
approximated	app	270.2			0	39399	0	NA
lethal (1) G0334	l(1)G0334	150.1	1	(1,2);	1	31406	3	maker-Un.22713-snap-gene-1.68-mRNA-1,maker-Un.16454-augustus-gene-0.4-mRNA-1,maker-Un.11452-snap-gene-0.5-mRNA-1
CG9331	CG9331	271.2			2	35347	1	augustus_masked-A1.37-abinit-gene-1.6-mRNA-1
CG31673	CG31673	271.3			3	35348	0	NA
CG6927	CG6927	152.1		((1,2),3);	1	31419	1	maker-A1.1-augustus-gene-6.42-mRNA-1
CG31688	CG31688	272.2			0	35314	2	maker-A1.46-snap-gene-20.7-mRNA-1,maker-Un.7225-augustus-gene-0.0-mRNA-1
cdc23	cdc23	272.3			2	35315	1	maker-A1.12-augustus-gene-1.43-mRNA-1
protein tyrosine phosphatase 4E	Ptp4E	153.1		(1,2);	1	31425	0	NA
eclair	eca	273.2			2	41177	2	maker-Un.9858-augustus-gene-0.3-mRNA-1,maker-Un.1920-snap-gene-0.4-mRNA-1
CG6789	CG6789	154.1		(1,2);	1	31433	0	NA
CG7423	CG7423	274.2			2	32894	0	NA
CG41284	CG41284	155.2		(1,2);	1	5740851	0	NA
CG33177	CG33177	275.2			2	32438	0	NA
microsomal glutathione S-transferase-like	Mgstl	275.3			3	44110	1	augustus_masked-A1.32-abinit-gene-12.15-mRNA-1
histone demethylase 4B	Kdm4B	276.1			0	318918	3	augustus_masked-X2.13-abinit-gene-26.1-mRNA-1,maker-Un.8911-augustus-gene-0.3-mRNA-1,augustus_masked-X1Random.8-abinit-gene-33.6-mRNA-1
little imaginal discs	lid	276.2			0	33837	1	augustus_masked-X1.6-abinit-gene-1.3-mRNA-1
histone demethylase 4A	Kdm4A	276.3			0	35744	0	NA
thioredoxin T	TrxT	156.1		(((1,2),3),4);	1	31443	0	NA
CG31851	CG31851	277.2			2	318982	0	NA
CG14222	CG14222	277.3			3	32962	1	snap_masked-A2.1-abinit-gene-7.39-mRNA-1
arrest defective 1	Ard1	277.4			0	39175	1	maker-X1Random.2-snap-gene-3.4-mRNA-1
CG16756	CG16756	158.1		((1,2),3);	3	31460	0	NA
proteasome beta5R subunit	Prosbeta5R	278.2			2	37690	0	NA
proteasome beta5 subunit	Prosbeta5	278.3			3	45269	1	augustus_masked-X1.1-abinit-gene-32.2-mRNA-1
nimrod A	nimA	279.1			0	318930	0	NA
draper	drpr	279.2			0	38218	1	augustus_masked-X1Random.1-abinit-gene-6.5-mRNA-1
dromyosuppressin receptor 2	DmsR-2	159.3		(1,2);	1	38296	1	augustus_masked-X2.16-abinit-gene-22.0-mRNA-1
CG17493	CG17493	280.2			2	3355126	1	augustus_masked-X2.8-abinit-gene-4.1-mRNA-1
CG31814	CG31814	281.1			0	318958	1	maker-X2Random.18-augustus-gene-1.28-mRNA-1
CG6867	CG6867	281.2			0	32782	1	maker-Un.15976-snap-gene-0.6-mRNA-1
CG31646	CG31646	281.3			0	33795	0	NA
CG14010	CG14010	281.4			0	33793	0	NA
CG11320	CG11320	281.5			0	33925	0	NA
CG34391	CG34391	281.6			0	5740816	1	maker-X1Random.1-augustus-gene-4.18-mRNA-1
CG30104	CG30104	16.1	1	((1,2),3);	1	246458	2	snap_masked-A2.13-abinit-gene-0.19-mRNA-1,augustus_masked-Un.8748-abinit-gene-0.0-mRNA-1
CG6123	CG6123	282.2			2	32815	1	maker-A1.41-snap-gene-16.31-mRNA-1
Vsx2	Vsx2	160.1		(1,2);	1	31469	1	maker-A2.10-augustus-gene-3.71-mRNA-1
ribosomal protein S28a	RpS28a	283.2			2	43564	0	NA
CG34182	CG34182	283.3			3	5740688	0	NA
myosin light chain cytoplasmic	Mlc-c	161.1		(1,2);	1	31474	1	augustus_masked-X2.13-abinit-gene-7.1-mRNA-1
CG12264	CG12264	284.2			2	34613	3	maker-A1.4-augustus-gene-3.49-mRNA-1,maker-Un.23765-augustus-gene-0.0-mRNA-1,maker-Un.3413-snap-gene-0.1-mRNA-1
CG3097	CG3097	164.1		((1,2),3);	1	31503	0	NA
Ada1-2	Ada1-2	285.2			2	318992	0	NA
proteasome beta2R1 subunit	Prosbeta2R1	165.1		((1,2),3);	1	31511	0	NA
CG15653	CG15653	286.2			2	37388	0	NA
CG12729	CG12729	166.1		(1,2);	1	31515	0	NA
CG5565	CG5565	287.2			2	33323	0	NA
GS1-like	Gs1l	287.3			3	33653	2	maker-A2.11-augustus-gene-10.96-mRNA-1,snap_masked-A2.11-abinit-gene-6.24-mRNA-1
actin 5C	Act5C	167.1		(((1,2),3),(4,5));	1	31521	1	augustus_masked-A1.30-abinit-gene-2.10-mRNA-1
CG31974	CG31974	288.2			2	33174	3	augustus_masked-A1.4-abinit-gene-3.4-mRNA-1,maker-X1Random.2-augustus-gene-16.88-mRNA-1,maker-Un.16513-snap-gene-0.4-mRNA-1
lethal (1) G0232	l(1)G0232	289.1			0	31907	1	maker-A2.14-augustus-gene-10.89-mRNA-1
ia2	ia2	289.2			0	33277	1	augustus_masked-A1.45-abinit-gene-2.1-mRNA-1
Leukocyte-antigen-related-like	Lar	289.3			0	35259	2	maker-A1.16-augustus-gene-2.31-mRNA-1,augustus_masked-A1.16-abinit-gene-1.9-mRNA-1
protein tyrosine phosphatase 61F	Ptp61F	289.4			0	38160	1	maker-X1.7-snap-gene-14.19-mRNA-1
protein tyrosine phosphatase 69D	Ptp69D	289.5			0	39443	1	maker-A2.9-augustus-gene-4.63-mRNA-1
protein tyrosine phosphatase 99A	Ptp99A	289.6			0	43469	0	NA
corkscrew	csw	289.7			0	45278	1	maker-Un.12126-snap-gene-0.0-mRNA-1
CG30108	CG30108	17.1		(1,2);	1	246460	0	NA
Chitinase-like	Chit	290.2			3	36868	0	NA
imaginal disc growth factor 5	Idgf5	290.3			2	37104	0	NA
imaginal disc growth factor 2	Idgf2	290.4			4	34979	0	NA
imaginal disc growth factor 1	Idgf1	290.5			5	34978	0	NA
imaginal disc growth factor 3	Idgf3	290.6			6	34981	0	NA
CG15309	CG15309	291.1			0	31949	1	maker-Un.17844-augustus-gene-0.5-mRNA-1
yippee	Yippee	291.2			0	32295	0	NA
CG32683	CG32683	292.1			0	31970	1	maker-A2.14-augustus-gene-0.36-mRNA-1
arrestin 1	Arr1	292.2			0	35078	1	maker-A1.36-snap-gene-4.106-mRNA-1
arrestin 2	Arr2	292.3			0	38993	1	maker-Un.10998-snap-gene-0.34-mRNA-1
kurtz	krz	292.4			0	53554	2	maker-X2.3-snap-gene-0.34-mRNA-1,maker-X1.7-snap-gene-70.7-mRNA-1
CG3774	CG3774	171.1		(1,2);	1	31553	1	maker-A2.3-augustus-gene-0.34-mRNA-1
CG7603	CG7603	293.2			2	39948	0	NA
CG1628	CG1628	294.1			0	31990	1	snap_masked-Un.11657-abinit-gene-0.29-mRNA-1+maker-Un.15897-snap-gene-0.3-mRNA-2
CG3566	CG3566	173.1		(1,2);	1	31562	0	NA
CG3476	CG3476	294.3			2	33987	0	NA
CG4995	CG4995	294.4			0	34390	1	maker-A1.26-augustus-gene-1.19-mRNA-1
Rpt4	Rpt4	175.1		(1,2);	1	31567	1	snap_masked-A1.27-abinit-gene-7.29-mRNA-1
CG11951	CG11951	295.2			1	43463	0	NA
CG31427	CG31427	295.3			2	43464	0	NA
CG10602	CG10602	295.4			7	35146	1	augustus_masked-A2.13-abinit-gene-11.8-mRNA-1
slamdance	sda	295.5			8	44359	1	maker-X1.7-augustus-gene-5.57-mRNA-1
mitochondrial assembly regulatory factor	Marf	177.1		(1,2);	1	31581	1	maker-X1Random.38-snap-gene-5.73-mRNA-1
CG31445	CG31445	295.7			4	326140	0	NA
CG7653	CG7653	295.8			5	34935	0	NA
CG3502	CG3502	295.9			6	37695	0	NA
CG14516	CG14516	295.10			0	43444	1	maker-X1Random.8-snap-gene-7.78-mRNA-1
copper transporter 1A	Ctr1A	179.1		((1,2),3);	3	31601	1	maker-Un.5046-augustus-gene-0.3-mRNA-1
Autophagy-specific gene 8b	Atg8b	296.2			2	42132	0	NA
lethal (1) G0255	l(1)G0255	181.1	1	((1,2),3);	1	31605	3	augustus_masked-A2.11-abinit-gene-8.13-mRNA-1,augustus_masked-Un.21933-abinit-gene-0.2-mRNA-1,maker-Un.23389-augustus-gene-0.0-mRNA-1
adenine nucleotide translocase 2	Ant2	297.2			2	32008	0	NA
CG14442	CG14442	182.1		(1,2);	1	31609	0	NA
sister of feo	sofe	298.2			2	32016	1	augustus_masked-A1.47-abinit-gene-9.15-mRNA-1
CG2059	CG2059	190.1		(1,2);	1	31663	1	augustus_masked-A2.12-abinit-gene-25.15-mRNA-1
CG14995	CG14995	299.2			2	38487	0	NA
CG15035	CG15035	191.1		((1,2),3);	1	31673	0	NA
CG3303	CG3303	300.2			2	41931	0	NA
CG10920	CG10920	194.1		(1,2);	1	31688	0	NA
CG1287	CG1287	301.2			2	40898	0	NA
CG1409	CG1409	195.1		(1,2);	1	31689	0	NA
Hsp60C	Hsp60C	302.2			3	33796	0	NA
Hsp60D	Hsp60D	302.3			1	34763	0	NA
heat shock protein 60 related	Hsp60B	302.4			2	48572	0	NA
Rpt3	Rpt3	303.1			0	32047	1	maker-A2.14-augustus-gene-5.46-mRNA-1
Nek2	Nek2	197.1		(1,2);	1	31696	0	NA
proteasome 26S subunit subunit 4 ATPase	Pros26.4	303.3			2	42828	1	maker-X1.7-snap-gene-92.23-mRNA-1
CG31809	CG31809	199.2		((1,2),(3,4));	1	318954	0	NA
Klp59C	Klp59C	304.2			1	37671	0	NA
Klp59D	Klp59D	304.3			2	37674	0	NA
CG11105	CG11105	305.1			0	32063	0	NA
CG5890	CG5890	305.2			0	43126	1	augustus_masked-X1Random.2-abinit-gene-6.0-mRNA-1
v(2)k05816	v(2)k05816	2.1		(1,2);	1	117361	0	NA
ionotropic receptor 100a	Ir100a	306.2			2	43753	1	maker-Un.10568-snap-gene-0.0-mRNA-1+maker-Un.9917-snap-gene-0.0-mRNA-1
CG1657	CG1657	307.1			0	32070	1	augustus_masked-A2.10-abinit-gene-4.0-mRNA-1
CG9139	CG9139	307.2			0	38144	1	snap_masked-X2.13-abinit-gene-24.23-mRNA-1
glutamine synthetase 2	Gs2	308.1			0	32087	1	maker-Un.16662-snap-gene-0.83-mRNA-1
glutamine synthetase 1	Gs1	308.2			0	33172	0	NA
CG30178	CG30178	20.1		(((1,2),3),4);	4	246501	0	NA
sphingosine kinase 2	Sk2	309.2			2	326219	1	maker-X1.7-snap-gene-104.69-mRNA-1
RNA polymerase II 215kD subunit	RpII215	310.1			0	32100	1	maker-X1.3-augustus-gene-0.40-mRNA-1
CG17209	CG17209	310.2			0	32524	1	augustus_masked-A2.1-abinit-gene-0.4-mRNA-1
RNA polymerase I subunit	RpI1	310.3			0	36617	1	augustus_masked-A2.5-abinit-gene-4.2-mRNA-1
rhomboid-4	rho-4	311.1			0	32109	2	snap_masked-Un.9350-abinit-gene-0.52-mRNA-1,maker-Un.9350-snap-gene-0.66-mRNA-1
rhomboid-6	rho-6	311.2			0	34640	0	NA
lethal (1) G0193	l(1)G0193	200.1	1	(1,2);	1	31712	4	maker-A1.47-augustus-gene-5.73-mRNA-1,snap_masked-X1.7-abinit-gene-94.33-mRNA-1,maker-X1.7-snap-gene-94.53-mRNA-1,snap_masked-X1.7-abinit-gene-94.19-mRNA-1
stem cell tumor	stet	311.4			2	38169	1	maker-X2.17-augustus-gene-3.15-mRNA-1
roughoid	ru	311.5			3	44856	0	NA
CG1703	CG1703	312.1			0	32112	1	maker-Un.1210-snap-gene-0.3-mRNA-1
CG9281	CG9281	312.2			0	32508	1	maker-Un.17640-augustus-gene-0.4-mRNA-1
CG9330	CG9330	312.3			0	40131	1	augustus_masked-X1Random.10-abinit-gene-5.10-mRNA-1
CG1571	CG1571	201.1		(1,2);	1	31725	0	NA
germ cell-expressed bHLH-PAS	gce	313.2			2	32457	1	maker-X2.3-augustus-gene-7.46-mRNA-1
dusky	dy	314.1			0	32130	1	maker-A1.27-snap-gene-4.79-mRNA-1
dusky-like	dyl	314.2			0	38531	1	snap_masked-A2.11-abinit-gene-6.48-mRNA-1
miniature	m	314.3			0	44835	2	maker-A1.27-snap-gene-7.61-mRNA-1,snap_masked-A1.27-abinit-gene-3.14-mRNA-1
Ubc-E2H	Ubc-E2H	203.1		(1,2);	1	31728	1	maker-X1Random.3-augustus-gene-13.2-mRNA-1
p24-related-1	p24-1	315.2			3	32140	1	snap_masked-Un.16308-abinit-gene-0.10-mRNA-1
CG9053	CG9053	315.3			2	32435	1	maker-A1.33-snap-gene-4.14-mRNA-1
thioredoxin reductase-1	Trxr-1	206.1		(1,2);	1	31760	1	maker-Un.8731-snap-gene-0.4-mRNA-1
CG10588	CG10588	316.2			2	40316	0	NA
CG10353	CG10353	317.1			0	32148	0	NA
CG6938	CG6938	317.2			0	39362	1	maker-X1.7-snap-gene-77.4-mRNA-1
CG16718	CG16718	317.3			0	42340	1	maker-A2.6-augustus-gene-1.73-mRNA-1
Upf1	Upf1	318.1			0	32153	1	maker-Un.21950-augustus-gene-1.59-mRNA-1
CG1440	CG1440	208.1		(1,2);	1	31776	1	maker-A2Random.62-augustus-gene-1.62-mRNA-1
CG6967	CG6967	318.3			2	36922	0	NA
CG7504	CG7504	318.4			0	38904	1	maker-X1.7-augustus-gene-111.18-mRNA-1
Ca-alpha1T	Ca-alpha1T	319.1			0	31550	1	snap_masked-A1.32-abinit-gene-9.33-mRNA-1
cacophony	cac	319.2			0	32158	2	maker-Un.19322-augustus-gene-1.53-mRNA-1,maker-Un.19322-augustus-gene-1.52-mRNA-1
paralytic	para	319.3			0	32619	1	maker-A2.8-augustus-gene-4.23-mRNA-1
Ca[2+]-channel protein alpha[[1]] subunit D	Ca-alpha1D	319.4			0	34950	0	NA
Na channel protein 60E	NaCP60E	319.5			0	37981	1	augustus_masked-X1.7-abinit-gene-66.6-mRNA-1
Dorsocross3	Doc3	209.5		((1,2),3);	3	39036	0	NA
CG11582	CG11582	320.2			2	38525	0	NA
crossveinless	cv	320.3			3	44510	1	augustus_masked-A1.35-abinit-gene-2.5-mRNA-1
CG18853	CG18853	21.1		(1,2);	1	246511	0	NA
CG14221	CG14221	321.2			2	32961	0	NA
furrowed	fw	322.1			0	32162	1	maker-A1.33-snap-gene-8.30-mRNA-1
CG9095	CG9095	322.2			0	32447	1	maker-Un.23261-augustus-gene-0.17-mRNA-1
CG18789	CG18789	210.1		(1,2);	1	317813	0	NA
CG4829	CG4829	323.2			2	32672	0	NA
CG6461	CG6461	323.3			0	32839	0	NA
CG17636	CG17636	323.4			0	5740847	1	maker-A1.41-augustus-gene-11.63-mRNA-1
CG32026	CG32026	212.1		((1,2),3);	1	317829	0	NA
senescence marker protein-30	smp-30	324.2			2	41786	0	NA
elongase 68alpha	Elo68alpha	213.1		(1,2);	1	317841	0	NA
CG14164	CG14164	325.2			2	39167	0	NA
ubiquitin-specific protease 7	Usp7	326.1			0	32169	2	snap_masked-X1.7-abinit-gene-57.60-mRNA-1,augustus_masked-Un.20633-abinit-gene-3.12-mRNA-1
Ubiquitin-specific protease 64E	Ubp64E	326.2			0	38644	1	maker-X1Random.2-augustus-gene-23.69-mRNA-2
CG7023	CG7023	326.3			0	42702	1	maker-Un.11095-augustus-gene-0.3-mRNA-1
Vha16-3	Vha16-3	214.1		((((1,2),3),4),5);	1	317846	0	NA
CG8445	CG8445	327.2			0	36794	1	augustus_masked-X1Random.8-abinit-gene-31.0-mRNA-1
ubiquitin C-terminal hydrolase	Uch-L3	327.3			2	39102	1	maker-X1.7-augustus-gene-71.40-mRNA-1
CG32155	CG32155	215.1	1	(1,2);	1	317887	2	maker-Un.16430-augustus-gene-6.54-mRNA-1,augustus_masked-X1.7-abinit-gene-82.16-mRNA-1
CG9906	CG9906	328.2			3	32620	0	NA
CG11235	CG11235	328.3			4	33067	0	NA
calreticulin	Crc	328.4			0	41166	1	maker-A2.1-augustus-gene-23.94-mRNA-1
calnexin 99A	Cnx99A	328.5			2	44643	1	snap_masked-Un.11630-abinit-gene-0.1-mRNA-1
tenascin accessory	Ten-a	329.1			0	32183	1	maker-A1.44-augustus-gene-2.32-mRNA-1
tenascin major	Ten-m	329.2			0	40464	1	maker-X1.1-snap-gene-23.4-mRNA-1
LIM-kinase1	LIMK1	330.1			0	32207	0	NA
center divider	cdi	330.2			0	42289	1	augustus_masked-X2.16-abinit-gene-12.1-mRNA-1
ovarian tumor	otu	216.1		(1,2);	1	31789	1	maker-A1.41-augustus-gene-21.61-mRNA-1
CG31773	CG31773	331.2			2	326159	0	NA
CG2540	CG2540	332.1			0	32216	0	NA
CG10365	CG10365	332.2			0	42801	1	maker-X1.7-snap-gene-61.56-mRNA-1
CG32191	CG32191	217.1		((1,2),3);	3	317903	0	NA
CG17024	CG17024	333.2			4	34664	0	NA
CG41581	CG41581	333.3			1	5740426	0	NA
CG40801	CG40801	333.4			2	5740548	0	NA
CG32196	CG32196	218.1		(1,2);	1	317908	1	maker-A2.12-snap-gene-11.34-mRNA-2
CG10107	CG10107	334.2			3	38748	0	NA
CG41423	CG41423	334.3			2	5740393	0	NA
CG3812	CG3812	335.1			0	32230	1	snap_masked-A2.9-abinit-gene-9.56-mRNA-1
fu12	fu12	335.2			0	34176	1	snap_masked-Un.1100-abinit-gene-0.31-mRNA-1
phosphodiesterase 9	Pde9	336.1			0	32233	1	augustus_masked-Un.19322-abinit-gene-7.3-mRNA-1
phosphodiesterase 11	Pde11	336.2			0	35107	2	maker-A1.37-augustus-gene-1.39-mRNA-1,augustus_masked-X2.3-abinit-gene-1.3-mRNA-1
phosphodiesterase 6	Pde6	336.3			0	41760	1	maker-Un.6375-augustus-gene-1.17-mRNA-1+maker-Un.7778-augustus-gene-0.3-mRNA-1
CG8331	CG8331	22.2		(1,2);	1	36569	1	maker-Un.17795-augustus-gene-0.7-mRNA-1
CG16848	CG16848	337.2			2	34759	0	NA
Trf4-1	Trf4-1	220.1		(1,2);	1	31795	1	maker-Un.16027-snap-gene-0.26-mRNA-2
CG3838	CG3838	338.2			3	34275	1	maker-Un.16534-snap-gene-3.10-mRNA-1
CG3919	CG3919	338.3			2	39582	0	NA
CG4395	CG4395	339.1			0	32246	0	NA
diuretic hormone 31 receptor 1	Dh31-R1	339.2			0	36475	1	maker-Un.18557-snap-gene-2.38-mRNA-1
CG42629	CG42629	340.1			0	32253	2	maker-Un.22669-snap-gene-0.4-mRNA-1,augustus_masked-Un.17943-abinit-gene-0.0-mRNA-1
Rapgap1	Rapgap1	340.2			0	34032	2	maker-A1.20-snap-gene-1.40-mRNA-1,augustus_masked-Un.17588-abinit-gene-10.1-mRNA-1
gprs	gprs	340.3			0	36862	1	maker-A1Random.37-augustus-gene-3.0-mRNA-1+maker-A1Random.37-snap-gene-3.47-mRNA-1
ferritin 3 heavy chain homologue	Fer3HCH	341.1			0	32260	0	NA
ferritin 1 heavy chain homologue	Fer1HCH	341.2			0	46415	0	NA
CG32280	CG32280	221.1		(1,2);	1	317952	1	maker-X1.7-snap-gene-2.4-mRNA-1
CG4330	CG4330	342.2			0	32263	0	NA
CG4726	CG4726	342.3			0	33292	0	NA
picot	Picot	342.4			2	36865	1	snap_masked-A2.13-abinit-gene-0.30-mRNA-1
CG4332	CG4332	343.1			0	32267	0	NA
CG3702	CG3702	343.2			0	33628	1	maker-Un.16713-augustus-gene-0.6-mRNA-1
HDAC4	HDAC4	344.1			0	32278	1	snap_masked-A1.31-abinit-gene-0.3-mRNA-1
HDAC6	HDAC6	344.2			0	32461	2	augustus_masked-A1.41-abinit-gene-13.7-mRNA-1,augustus_masked-Un.17807-abinit-gene-0.3-mRNA-1
CG15743	CG15743	345.1			0	32279	2	snap_masked-A1.36-abinit-gene-6.12-mRNA-1,maker-A2.9-snap-gene-19.42-mRNA-1
CG7789	CG7789	345.2			0	43516	1	augustus_masked-X1Random.3-abinit-gene-8.6-mRNA-1
inositol 1,4,5-triphosphate kinase 2	IP3K2	346.1			0	32285	1	maker-A2.12-augustus-gene-13.77-mRNA-1
inositol 1,4,5-triphosphate kinase 1	IP3K1	346.2			0	34300	1	augustus_masked-A1.4-abinit-gene-2.3-mRNA-1
CG32320	CG32320	223.1		(1,2);	1	317977	0	NA
doublesex	dsx	347.2			0	40940	1	augustus_masked-X1.7-abinit-gene-40.1-mRNA-1+snap_masked-X1.7-abinit-gene-40.8-mRNA-1
doublesex-Mab related 93B	dmrt93B	347.3			2	42494	1	maker-X1Random.8-augustus-gene-22.77-mRNA-1
doublesex-Mab related 99B	dmrt99B	347.4			0	43495	1	maker-X1Random.3-augustus-gene-10.54-mRNA-1
CG32371	CG32371	224.1		(((((1,2),3),4),5),6);	2	317999	0	NA
xl6	xl6	348.2			0	33967	0	NA
repressor splicing factor 1	Rsf1	348.3			0	34370	1	maker-A2.2-snap-gene-0.57-mRNA-2
RNA-binding protein 1	Rbp1	348.4			2	41294	1	maker-Un.20744-augustus-gene-3.26-mRNA-1
CG32373	CG32373	225.1		(1,2);	1	318000	0	NA
CG11162	CG11162	349.2			2	32325	1	maker-A1.16-snap-gene-1.66-mRNA-1
CG32413	CG32413	226.1		(1,2);	1	318018	0	NA
CG11158	CG11158	350.2			2	32327	0	NA
CG5418	CG5418	350.3			3	34663	3	snap_masked-A1.46-abinit-gene-24.35-mRNA-1,maker-A1.46-snap-gene-24.89-mRNA-1,augustus_masked-A1.46-abinit-gene-24.11-mRNA-1
retinal degeneration B	rdgB	351.1			0	32340	1	augustus_masked-A1.33-abinit-gene-5.0-mRNA-1
rdgBbeta	rdgBbeta	351.2			0	37011	1	maker-Un.20086-snap-gene-5.62-mRNA-1
vibrator	vib	351.3			0	42306	1	snap_masked-A2.1-abinit-gene-0.42-mRNA-1
CG10992	CG10992	352.1			0	32341	1	maker-A2.9-snap-gene-18.57-mRNA-1
CG3074	CG3074	352.2			0	37537	1	snap_masked-Un.16430-abinit-gene-7.49-mRNA-1
CG11103	CG11103	353.1			0	32342	1	maker-A1.44-snap-gene-2.3-mRNA-1
CG10795	CG10795	353.2			0	37443	1	maker-X2.16-augustus-gene-5.58-mRNA-1
almondex	amx	353.3			0	43869	1	maker-X2.11-augustus-gene-3.34-mRNA-1
CG6168	CG6168	226.3		(3,4);	3	39273	0	NA
CG7262	CG7262	354.2			2	41804	1	augustus_masked-Un.17377-abinit-gene-1.2-mRNA-1
lethal (1) G0007	l(1)G0007	355.1			0	32373	1	maker-A1.29-snap-gene-17.26-mRNA-1
CG32533	CG32533	355.2			0	32933	1	snap_masked-A2.12-abinit-gene-31.67-mRNA-1
CG3225	CG3225	355.3			0	33680	1	maker-A2.12-augustus-gene-27.79-mRNA-1
CG4901	CG4901	355.4			0	34357	1	augustus_masked-Un.16534-abinit-gene-2.10-mRNA-1
lethal (2) 37Cb	l(2)37Cb	355.5			0	35192	1	snap_masked-Un.17588-abinit-gene-12.27-mRNA-1
CG11107	CG11107	355.6			0	35654	1	augustus_masked-X2.15-abinit-gene-1.11-mRNA-1
peanuts	pea	355.7			0	36561	1	maker-X2.13-augustus-gene-13.88-mRNA-1
CG1434	CG1434	356.1			0	32377	1	maker-A1.35-augustus-gene-3.67-mRNA-1
CG3645	CG3645	356.2			0	33190	1	maker-A1.23-augustus-gene-0.32-mRNA-1
mRNA-capping-enzyme	mRNA-capping-enzyme	357.1			0	32379	1	maker-X1Random.2-augustus-gene-28.70-mRNA-1
CG13197	CG13197	357.2			0	36253	1	augustus_masked-X2.17-abinit-gene-21.4-mRNA-1
CG9413	CG9413	358.1			0	32397	2	maker-A2.14-augustus-gene-10.84-mRNA-1,snap_masked-X1Random.1-abinit-gene-2.57-mRNA-1
JhI-21	JhI-21	358.3			0	34624	1	maker-Un.12208-augustus-gene-1.15-mRNA-1
minidiscs	mnd	358.4			0	39625	1	maker-X2.16-snap-gene-17.5-mRNA-1
genderblind	gb	358.5			0	43265	1	maker-X1.7-augustus-gene-101.148-mRNA-1
CG1607	CG1607	358.6			0	43707	0	NA
CG32463	CG32463	228.1		((1,2),3);	1	318044	0	NA
CG5347	CG5347	359.2			2	32403	0	NA
makorin 1	Mkrn1	359.3			0	44131	0	NA
rutabaga	rut	360.1			0	32406	1	maker-A1.32-snap-gene-11.84-mRNA-1
adenylyl cyclase 35C	Ac13E	360.2			0	32485	1	augustus_masked-A1.33-abinit-gene-6.6-mRNA-1
Ac3	Ac3	360.3			0	35419	2	maker-A1.19-augustus-gene-2.30-mRNA-1,maker-Un.439-snap-gene-0.1-mRNA-1
CG42513	CG42513	360.4			0	39835	0	NA
adenylyl cyclase 76E	Ac76E	360.5			0	40180	1	maker-A1.3-augustus-gene-4.49-mRNA-1
adenylyl cyclase 78C	Ac78C	360.6			0	40333	1	maker-Un.1980-snap-gene-5.64-mRNA-1
CG14411	CG14411	361.1			0	32408	1	snap_masked-A1Random.33-abinit-gene-0.4-mRNA-1
SET domain binding factor	Sbf	361.2			0	41427	1	maker-A2.5-snap-gene-1.82-mRNA-1
CG14407	CG14407	362.1			0	32410	0	NA
CG6523	CG6523	362.2			0	34745	1	snap_masked-A1.29-abinit-gene-12.70-mRNA-1
CG9518	CG9518	363.1			0	32416	1	augustus_masked-A2.6-abinit-gene-2.3-mRNA-1
CG6142	CG6142	363.2			0	43178	2	snap_masked-A2.12-abinit-gene-1.25-mRNA-1,maker-A2.12-augustus-gene-1.50-mRNA-1
CG9517	CG9517	363.3			0	32417	1	snap_masked-Un.2870-abinit-gene-0.2-mRNA-1
CG9514	CG9514	363.4			0	32418	1	maker-A2.6-augustus-gene-2.38-mRNA-1
CG9503	CG9503	363.5			0	32424	1	maker-A2Random.19-augustus-gene-0.3-mRNA-1
glucose dehydrogenase	Gld	363.6			0	40875	1	maker-Un.16006-snap-gene-1.35-mRNA-1
flotillin 2	Flo-2	364.1			0	32425	1	maker-Un.22511-augustus-gene-0.4-mRNA-1
flotillin	Flo	364.2			0	36726	1	augustus_masked-X2.16-abinit-gene-5.10-mRNA-1
CG9009	CG9009	365.1			0	32426	2	maker-A2.12-snap-gene-10.8-mRNA-1,augustus_masked-A2.12-abinit-gene-10.0-mRNA-1
CG6178	CG6178	365.2			0	42867	2	maker-X1.7-augustus-gene-88.35-mRNA-1,snap_masked-X1Random.8-abinit-gene-28.24-mRNA-1
ether a go-go	eag	366.1			0	32428	2	maker-A2.12-snap-gene-10.74-mRNA-1,maker-Un.16209-snap-gene-0.39-mRNA-1
eag-like K[+] channel	elk	366.2			0	37047	1	maker-Un.12757-augustus-gene-0.40-mRNA-1
seizure	sei	366.3			0	37843	1	maker-X2.11-snap-gene-5.56-mRNA-1
CG32483	CG32483	229.1		(((1,2),3),4);	1	318050	0	NA
brummer	bmm	367.2			2	39611	1	snap_masked-Un.16641-abinit-gene-0.1-mRNA-1+maker-A2.13-snap-gene-4.31-mRNA-1
rab3-GEF	rab3-GEF	368.1			0	32442	2	maker-Un.19865-augustus-gene-4.76-mRNA-1,maker-Un.12572-augustus-gene-0.4-mRNA-1
CG7852	CG7852	368.2			0	38178	1	maker-X1Random.8-snap-gene-24.7-mRNA-1
ribosomal protein L37a	RpL37a	369.1			0	32446	1	maker-A1.33-snap-gene-3.67-mRNA-1
ribosomal protein L37b	RpL37b	369.2			0	37669	0	NA
CG30203	CG30203	23.1		((1,2),3);	1	246514	0	NA
CG8004	CG8004	370.2			2	40178	1	augustus_masked-X1Random.8-abinit-gene-3.6-mRNA-1
CG32506	CG32506	230.1		(1,2);	1	318059	0	NA
vasa intronic gene	vig	371.2			3	34885	1	augustus_masked-Un.19389-abinit-gene-0.2-mRNA-1
vig2	vig2	371.3			1	43016	0	NA
CG41503	CG41503	371.4			2	8674077	0	NA
CG32581	CG32581	231.1		((1,2),3);	1	318098	0	NA
CG12608	CG12608	372.2			2	32463	1	augustus_masked-A1.36-abinit-gene-4.2-mRNA-1
CG6227	CG6227	373.1			0	32464	1	snap_masked-X2.8-abinit-gene-10.66-mRNA-1
CG6418	CG6418	373.2			0	39218	1	maker-Un.16430-snap-gene-10.73-mRNA-1
CNG channel-like	cngl	374.1			0	32468	0	NA
Cyclic-nucleotide-gated ion channel protein	Cng	374.2			0	36806	1	maker-X2.16-augustus-gene-11.27-mRNA-1
CG17922	CG17922	374.3			0	37479	1	maker-A1Random.67-snap-gene-1.7-mRNA-1
CG42260	CG42260	374.4			0	37614	1	maker-X1Random.3-snap-gene-12.33-mRNA-1
adenosylhomocysteinase at 13	Ahcy13	375.1			0	32471	1	augustus_masked-A1.36-abinit-gene-5.0-mRNA-1
CG32708	CG32708	233.1		(((1,2)3,),4);	4	318161	1	maker-A1.29-snap-gene-18.5-mRNA-1
adenosylhomocysteinase 89E	Ahcy89E	375.3			2	42043	0	NA
CG1885	CG1885	234.1		(1,2);	1	31817	1	augustus_masked-X1Random.2-abinit-gene-6.2-mRNA-1
CG9903	CG9903	376.2			2	32621	0	NA
CG7860	CG7860	377.1			0	32488	0	NA
taspase 1	Taspase1	377.2			0	39757	0	NA
CG9220	CG9220	378.1			0	32497	1	maker-A1.33-augustus-gene-4.49-mRNA-1
CG12913	CG12913	378.2			0	36079	1	maker-X2.8-augustus-gene-13.52-mRNA-1
CG32792	CG32792	235.1		((1,2),3);	1	318213	0	NA
RNA polymerase II elongation factor	TfIIS	379.2			2	34883	3	maker-Un.3725-augustus-gene-0.3-mRNA-1,augustus_masked-A2.12-abinit-gene-1.11-mRNA-1,maker-Un.3206-augustus-gene-0.0-mRNA-1
CG9240	CG9240	380.1			0	32505	1	maker-A1.46-snap-gene-17.81-mRNA-1
CG11110	CG11110	380.2			0	37337	1	maker-X2.17-snap-gene-10.91-mRNA-2
CG8184	CG8184	381.1			0	32510	1	maker-X1.2-snap-gene-1.1-mRNA-1
suppressor of deltex	Su(dx)	381.2			0	33379	1	augustus_masked-Un.17377-abinit-gene-5.4-mRNA-1
lethal with a checkpoint kinase	lack	381.3			0	36999	1	maker-X2Random.32-augustus-gene-0.22-mRNA-1
Nedd4	Nedd4	381.4			0	39958	1	augustus_masked-X1Random.2-abinit-gene-25.14-mRNA-1
CG12661	CG12661	236.1		((1,2),3);	3	31822	0	NA
CG8206	CG8206	382.2			2	32516	0	NA
CG8959	CG8959	383.1			0	32528	1	snap_masked-A1.46-abinit-gene-20.13-mRNA-1
CG11048	CG11048	383.2			0	37284	0	NA
CG32808	CG32808	237.1		((1,2),3);	3	318221	0	NA
phosphotyrosyl phosphatase activator	Ptpa	384.2			3	33555	0	NA
CG2104	CG2104	384.3			2	40702	0	NA
CG32832	CG32832	238.1		((1,2),3);	3	318237	0	NA
SRPK	SRPK	385.2			3	36706	1	augustus_masked-X2.3-abinit-gene-10.4-mRNA-1
CG11489	CG11489	385.3			2	40461	1	augustus_masked-X1.4-abinit-gene-4.5-mRNA-1
Myb oncogene-like	Myb	386.1			0	32543	1	augustus_masked-X2.15-abinit-gene-0.2-mRNA-1
CG6905	CG6905	386.2			0	38062	1	maker-X1.7-augustus-gene-82.84-mRNA-1
CG32845	CG32845	239.1		(1,2);	1	318243	0	NA
glyceraldehyde 3 phosphate dehydrogenase 1	Gapdh1	387.2			2	35728	0	NA
CG9010	CG9010	387.3			0	36904	0	NA
CG7267	CG7267	240.1		(1,2);	1	31831	0	NA
CG16957	CG16957	388.2			2	34755	0	NA
CG8909	CG8909	389.1			0	32552	1	augustus_masked-A1.47-abinit-gene-0.11-mRNA-1
arrow	arr	389.2			0	44279	2	maker-A1.42-snap-gene-5.23-mRNA-1,maker-A1.42-snap-gene-4.48-mRNA-1
CG8916	CG8916	390.1			0	32553	1	snap_masked-A1.47-abinit-gene-1.50-mRNA-1
Ligand-gated chloride channel homolog 3	Lcch3	390.2			0	32554	1	maker-A1.47-augustus-gene-0.59-mRNA-1
resistant to dieldrin	Rdl	390.3			0	39054	0	NA
glycine receptor	Grd	390.4			0	39984	0	NA
GluClalpha	GluClalpha	390.5			0	42350	1	augustus_masked-Un.17072-abinit-gene-0.0-mRNA-1
mind-meld	mmd	391.1			0	32561	1	maker-A1.33-snap-gene-3.66-mRNA-1
Neu3	Neu3	391.2			0	3772109	1	maker-A1.7-snap-gene-1.2-mRNA-1
histone H3.3B	His3.3B	243.1		(1,2);	1	31848	1	augustus_masked-A1.36-abinit-gene-1.1-mRNA-1
CG5755	CG5755	392.2			2	35081	0	NA
CG9172	CG9172	393.1			0	32565	2	augustus_masked-X1Random.2-abinit-gene-10.1-mRNA-1,maker-Un.5245-augustus-gene-0.0-mRNA-1
CG2014	CG2014	393.2			0	43477	0	NA
CG8939	CG8939	394.1			0	32568	1	snap_masked-X2.17-abinit-gene-5.64-mRNA-1
histone H3	His3:CG31613	243.3	1	((3,4),5);	5	318847	4	maker-Un.19865-augustus-gene-2.2-mRNA-1,maker-Un.16035-augustus-gene-0.1-mRNA-1,maker-A2.3-augustus-gene-7.2-mRNA-1,maker-A2.1-augustus-gene-21.1-mRNA-1
CG7009	CG7009	394.3			2	42508	1	maker-A1.30-snap-gene-0.22-mRNA-1
vacuolar peduncle	vap	395.1			0	32569	1	maker-A2.7-snap-gene-2.31-mRNA-2
GTPase-activating protein 1	Gap1	395.2			0	39158	1	augustus_masked-Un.1980-abinit-gene-5.4-mRNA-1
CG31053	CG31053	245.1		(1,2);	1	318572	0	NA
CG8958	CG8958	396.2			2	32575	0	NA
CG14693	CG14693	396.3			3	41299	1	maker-X1.7-snap-gene-101.173-mRNA-1
CG31274	CG31274	247.2		(1,2);	1	318655	1	augustus_masked-X1.7-abinit-gene-28.5-mRNA-1
CG16719	CG16719	397.2			2	39131	0	NA
CG31077	CG31077	248.1		(1,2);	1	318583	0	NA
disco-related	disco-r	398.2			2	64875	2	maker-Un.5759-snap-gene-0.0-mRNA-1,augustus_masked-Un.20633-abinit-gene-4.0-mRNA-1
CG3415	CG3415	399.1			0	32582	1	augustus_masked-X1Random.2-abinit-gene-10.18-mRNA-1
CG5590	CG5590	399.2			0	43325	1	augustus_masked-X1Random.2-abinit-gene-26.1-mRNA-1
CG31115	CG31115	249.1		(1,2);	1	318597	0	NA
proteasome alpha5 subunit	Prosalpha5	400.2			0	36951	1	augustus_masked-X2.8-abinit-gene-6.1-mRNA-1
proteasome 28kD subunit 1B	Pros28.1B	400.3			3	37910	0	NA
proteasome 25kD subunit	Pros25	400.4			0	41531	1	maker-A2.12-augustus-gene-12.33-mRNA-1
proteasome 28kD subunit 1A	Pros28.1A	400.5			2	42457	0	NA
CG30275	CG30275	25.1		(1,2);	1	246522	0	NA
CG17856	CG17856	401.2			2	43369	1	maker-X1.7-augustus-gene-59.8-mRNA-1
CG31198	CG31198	251.1		(1,2);	1	318622	1	augustus_masked-Un.20964-abinit-gene-2.0-mRNA-1
CG14718	CG14718	402.2			2	41413	0	NA
CG31202	CG31202	252.1		(1,2);	1	318624	0	NA
CG10029	CG10029	403.2			2	40883	0	NA
CG3632	CG3632	404.1			0	32589	1	augustus_masked-A2.12-abinit-gene-2.9-mRNA-1
myotubularin	mtm	404.2			0	33845	1	maker-A1.15-augustus-gene-7.65-mRNA-1
CG3530	CG3530	404.3			0	37707	1	snap_masked-X1.7-abinit-gene-43.14-mRNA-1
CG5026	CG5026	404.4			0	39026	2	augustus_masked-Un.20327-abinit-gene-0.0-mRNA-1,augustus_masked-Un.9350-abinit-gene-0.11-mRNA-1
CG31262	CG31262	254.1		(((1,2),3),4);	3	318649	0	NA
CG10131	CG10131	405.2			2	36624	0	NA
CG31294	CG31294	255.1		(((1,2),3),4);	1	318666	0	NA
CG3162	CG3162	406.2			2	37681	0	NA
CG31373	CG31373	257.1		(1,2);	1	318700	1	maker-Un.21930-augustus-gene-0.0-mRNA-1
CG12460	CG12460	407.2			1	3355078	0	NA
nonA-like	nonA-l	407.3			3	42026	0	NA
furin 2	Fur2	408.1			0	32604	1	augustus_masked-A2.12-abinit-gene-8.5-mRNA-1
amontillado	amon	408.2			0	43215	1	maker-X1.7-augustus-gene-82.86-mRNA-1
furin 1	Fur1	408.3			0	47220	1	maker-A2.12-snap-gene-16.83-mRNA-1
CG33298	CG33298	409.1			0	2768929	1	maker-A1.28-augustus-gene-12.54-mRNA-2
CG31413	CG31413	259.1		(((1,2),3),4);	3	318720	0	NA
CG4301	CG4301	409.3			2	32610	1	maker-A1.35-snap-gene-1.37-mRNA-1
CG31729	CG31729	409.4			0	34736	1	maker-A1.21-augustus-gene-1.49-mRNA-1
CG42321	CG42321	409.5			0	36488	1	maker-X1.1-snap-gene-26.11-mRNA-1
CG14741	CG14741	409.6			0	41469	1	maker-Un.17742-augustus-gene-0.3-mRNA-1+maker-Un.21950-augustus-gene-1.61-mRNA-1
TNF-receptor-associated factor-like	Traf-like	410.1			0	32611	1	maker-A1.29-augustus-gene-19.63-mRNA-1
TNF-receptor-associated factor 4	Traf4	410.2			0	33638	0	NA
CG31414	CG31414	260.1	1	(1,2);	1	318721	3	maker-A2.12-snap-gene-28.4-mRNA-1,maker-A2.12-augustus-gene-30.50-mRNA-1,augustus_masked-X2.8-abinit-gene-21.2-mRNA-1
annexin B11	Anxb11	411.2			2	32612	0	NA
annexin IX	AnnIX	411.3			0	42492	1	augustus_masked-A2.11-abinit-gene-10.16-mRNA-1
Tak1-like 1	Takl1	261.1		((1,2),3);	1	318725	0	NA
CG31139	CG31139	412.3			2	42698	0	NA
CG31454	CG31454	262.1		((1,2),3);	3	318744	0	NA
stunted	sun	413.2			2	44046	0	NA
CG31650	CG31650	414.1			0	326150	0	NA
supercoiling factor	scf	414.2			0	38145	1	snap_masked-A1.40-abinit-gene-0.13-mRNA-1
CG31467	CG31467	263.1		((1,2),3);	1	318751	0	NA
croquemort	crq	415.2			3	33219	1	augustus_masked-Un.16135-abinit-gene-0.0-mRNA-1
CG31741	CG31741	415.3			2	35079	0	NA
CG31473	CG31473	264.1		(1,2);	1	318753	0	NA
ZnT35C	ZnT35C	416.2			2	34890	0	NA
CG11163	CG11163	416.3			3	35513	1	maker-Un.23922-augustus-gene-2.32-mRNA-1
CG31937	CG31937	417.1			0	326177	0	NA
CG7601	CG7601	417.2			0	43502	3	augustus_masked-X2.3-abinit-gene-2.2-mRNA-1,maker-Un.16870-augustus-gene-0.6-mRNA-1,augustus_masked-X2.3-abinit-gene-2.1-mRNA-1
CG17440	CG17440	265.1		(1,2);	1	31879	0	NA
spitz	spi	418.2			2	35253	0	NA
histone H4	His4:CG31611	268.1		((1,2),3);	1	318846	0	NA
CG8918	CG8918	419.2			2	32704	0	NA
CG32344	CG32344	420.1			0	326208	1	augustus_masked-X2.15-abinit-gene-0.3-mRNA-1
CG9253	CG9253	420.2			0	35379	1	maker-A2.10-augustus-gene-4.66-mRNA-1
DEAD box protein 45A	Dbp45A	420.3			0	35917	1	snap_masked-X2.8-abinit-gene-20.39-mRNA-1
Rs1	Rs1	420.4			0	44087	0	NA
histone H2A	His2A:CG31618	269.1		((1,2),3);	3	318855	0	NA
CG6372	CG6372	421.2			2	38986	0	NA
Cht8	Cht8	27.5		((1,2),3);	3	37390	0	NA
CG11291	CG11291	422.2			2	37541	0	NA
CG32487	CG32487	422.3			3	38358	0	NA
CG5577	CG5577	422.4			4	39985	0	NA
CG5567	CG5567	422.5			5	39986	2	snap_masked-X2.16-abinit-gene-8.18-mRNA-1,maker-Un.23108-snap-gene-0.9-mRNA-2
CG31674	CG31674	271.1		((1,2),3);	1	318878	0	NA
CG3759	CG3759	423.2			3	34258	1	maker-A1.23-augustus-gene-4.62-mRNA-1
CG42345	CG42345	423.3			0	35494	3	maker-X2.13-snap-gene-22.35-mRNA-1,maker-A1.22-augustus-gene-5.99-mRNA-1,maker-A1.22-snap-gene-5.117-mRNA-3
CG5959	CG5959	423.5			2	43134	0	NA
CG31687	CG31687	272.1		(1,2);	1	318886	0	NA
CG10444	CG10444	424.2			2	37294	0	NA
CG5687	CG5687	424.3			0	38255	1	maker-X1Random.2-augustus-gene-16.86-mRNA-1
p24-related-2	p24-2	273.1		(1,2);	1	318890	0	NA
CG32087	CG32087	425.2			2	39323	0	NA
CG31715	CG31715	274.1		(1,2);	1	318909	1	augustus_masked-X1.4-abinit-gene-4.3-mRNA-1
ribosomal protein L40	RpL40	426.2			0	33629	0	NA
ribosomal protein S27A	RpS27A	426.3			0	34420	0	NA
Nedd8	Nedd8	426.4			0	35151	0	NA
Ubiquitin-63E	Ubi-p63E	426.5			2	38456	2	snap_masked-Un.1980-abinit-gene-1.19-mRNA-1,maker-Un.10246-augustus-gene-0.0-mRNA-1
CG33178	CG33178	275.1		((1,2),3);	1	318913	0	NA
calcineurin A1	CanA1	427.2			3	43670	0	NA
calcineurin A at 14F	CanA-14F	427.3			2	8674098	0	NA
CG31730	CG31730	277.1		((1,2),3);	1	318920	0	NA
CG33054	CG33054	428.2			1	40340	0	NA
CG34261	CG34261	428.3			2	5740205	2	snap_masked-X1.7-abinit-gene-101.57-mRNA-1,augustus_masked-Un.10512-abinit-gene-0.0-mRNA-1
CG31742	CG31742	278.1		((1,2),3);	1	318924	0	NA
CG6661	CG6661	429.2			2	39556	0	NA
CG7145	CG7145	429.3			3	40434	1	maker-A1Random.37-snap-gene-1.38-mRNA-1
CG33960	CG33960	28.1		(1,2);	1	246538	0	NA
CG7149	CG7149	430.2			0	34063	0	NA
CG40928	CG40928	430.3			2	5740707	0	NA
CG31802	CG31802	280.1		(1,2);	1	318949	0	NA
CG6805	CG6805	431.2			2	36911	0	NA
CG32700	CG32700	282.1		(1,2);	1	31896	0	NA
ribosomal protein S19b	RpS19b	432.2			2	42830	0	NA
septin 4	Sep4	433.1			0	32646	1	maker-Un.17359-snap-gene-0.5-mRNA-1
Septin-1	Sep1	433.2			0	33114	1	maker-Un.20633-snap-gene-3.25-mRNA-1
peanut	pnut	433.3			0	35801	1	augustus_masked-A1Random.118-abinit-gene-4.4-mRNA-1
ribosomal protein S28b	RpS28b	283.1		((1,2),3);	1	31897	1	maker-A1.46-augustus-gene-6.18-mRNA-1
PP2A-B'	PP2A-B'	434.2			0	42169	1	maker-A2Random.62-augustus-gene-2.52-mRNA-2
widerborst	wdb	434.3			2	43312	1	snap_masked-X1.7-abinit-gene-4.25-mRNA-1
CG4928	CG4928	435.1			0	32682	1	maker-A1.41-augustus-gene-1.31-mRNA-1
CG2121	CG2121	435.2			0	35814	1	augustus_masked-Un.16319-abinit-gene-0.0-mRNA-1
CG9059	CG9059	436.1			0	32688	1	snap_masked-Un.5638-abinit-gene-0.2-mRNA-1
CG40072	CG17684	436.2			0	3355066	1	maker-Un.7147-snap-gene-1.32-mRNA-1
CG11319	CG11319	436.3			0	33923	1	maker-Un.5760-augustus-gene-0.3-mRNA-1
CG31864	CG31864	284.1		(1,2);	1	318990	0	NA
Arpc3A	Arpc3A	437.2			2	41917	0	NA
Ada1-1	Ada1-1	285.1		(1,2);	1	318991	0	NA
ribosomal protein S5b	RpS5b	438.2			2	41807	0	NA
CG31913	CG31913	286.1		(1,2);	1	319023	1	maker-X2.13-snap-gene-16.86-mRNA-1
CG8915	CG8915	439.2			2	32715	0	NA
CG9323	CG9323	439.3			0	35339	0	NA
maleless	mle	439.4			0	35523	1	maker-X1Random.8-augustus-gene-26.77-mRNA-1
spindle E	spn-E	439.5			0	41919	0	NA
CG31924	CG31924	287.1		((1,2),3);	1	319030	0	NA
ryder cup	r-cup	440.2			1	33075	0	NA
CG15128	CG15128	440.3			3	37263	0	NA
CG7634	CG7634	440.4			4	40394	0	NA
walker cup	wa-cup	440.5			2	40892	0	NA
CG8557	CG8557	441.1			0	32729	2	maker-Un.10888-snap-gene-0.16-mRNA-1,maker-A2Random.23-augustus-gene-0.3-mRNA-1
sunday driver	syd	441.2			0	43905	1	augustus_masked-X1.7-abinit-gene-104.10-mRNA-1
CG31975	CG31975	288.1		(1,2);	1	319052	0	NA
CG6485	CG6485	442.2			2	39926	0	NA
CG42270	CG42270	443.1			0	32754	1	snap_masked-Un.17272-abinit-gene-6.21-mRNA-1
neurofibromin 1	Nf1	443.2			0	43149	1	augustus_masked-A2.9-abinit-gene-3.6-mRNA-1
Vha100-3	Vha100-3	29.1		((1,2),3),4);	4	246543	0	NA
Ods-site homeobox	OdsH	444.2			2	32758	0	NA
suppressor of cytokine signaling at 16D	Socs16D	445.1			0	32760	1	maker-Un.16662-snap-gene-0.81-mRNA-1
suppressor of cytokine signaling at 36E	Socs36E	445.2			0	35085	1	augustus_masked-Un.16061-abinit-gene-0.0-mRNA-1
suppressor of cytokine signaling at 44A	Socs44A	445.3			0	35786	1	maker-Un.291-augustus-gene-0.2-mRNA-1
CG8142	CG8142	446.1			0	32763	2	maker-Un.21742-augustus-gene-0.13-mRNA-1,maker-A2.10-augustus-gene-0.19-mRNA-1
replication factor C subunit 3	RfC3	446.2			0	34423	1	maker-A1.41-augustus-gene-21.67-mRNA-1
replication factor C subunit 4	RfC4	446.3			0	38492	1	snap_masked-X2.16-abinit-gene-14.19-mRNA-1
imaginal disc growth factor 4	Idgf4	290.1		(((1,2),3),((4,5),6));	1	31926	1	snap_masked-X1.1-abinit-gene-30.55-mRNA-1
Ucp4C	Ucp4C	447.2			1	33832	0	NA
Ucp4B	Ucp4B	447.3			2	33833	0	NA
bmcp	Bmcp	447.4			0	39322	2	maker-Un.2418-augustus-gene-0.37-mRNA-1,augustus_masked-Un.11259-abinit-gene-0.0-mRNA-1
CG15296	CG15296	293.1		(1,2);	1	31986	0	NA
ariadne 2	ari-2	448.2			0	37542	0	NA
CG12362	CG12362	448.3			2	39193	0	NA
congested-like trachea	colt	294.2		(1,2);	1	33470	1	maker-A1.33-snap-gene-3.70-mRNA-1
frequenin 2	Frq2	449.2			2	32799	1	maker-Un.11657-snap-gene-0.53-mRNA-1
neurocalcin	Nca	449.3			0	40186	1	snap_masked-X2.16-abinit-gene-14.56-mRNA-1
CG2111	CG2111	295.1		((7,8),9);	9	31995	0	NA
E(spl) region transcript mdelta	HLHmdelta	450.2			1	43150	0	NA
E(spl) region transcript mgamma	HLHmgamma	450.3			2	43151	0	NA
E(spl) region transcript mbeta	HLHmbeta	450.4			3	43152	2	maker-X1.4-augustus-gene-9.20-mRNA-1,maker-X1.4-augustus-gene-7.3-mRNA-1
E(spl) region transcript m3	HLHm3	450.5			4	43156	0	NA
E(spl) region transcript m7	HLHm7	450.6			5	43160	0	NA
SP1029	SP1029	295.6		(((1,2),(3,4)),(5,6));	3	53473	1	maker-Un.4728-augustus-gene-1.9-mRNA-1
persephone	psh	451.2			2	32832	0	NA
Lim1	Lim1	452.1			0	31813	1	maker-Un.17253-snap-gene-0.4-mRNA-1
CG4328	CG4328	452.2			0	39405	1	maker-X1Random.8-augustus-gene-13.49-mRNA-1
CG32105	CG32105	452.3			0	39406	1	maker-X1Random.8-augustus-gene-13.50-mRNA-1
beadex	Bx	452.5			0	32846	3	maker-X1.4-augustus-gene-10.25-mRNA-1,maker-A1.11-augustus-gene-4.35-mRNA-1,snap_masked-Un.21512-abinit-gene-4.15-mRNA-1
CG5708	CG5708	452.6			0	34361	1	maker-Un.19865-snap-gene-3.54-mRNA-1
tailup	tup	452.7			0	35147	2	maker-Un.4397-snap-gene-1.4-mRNA-1+maker-Un.4397-augustus-gene-1.23-mRNA-1,maker-Un.4397-snap-gene-1.3-mRNA-1
Lim3	Lim3	452.8			0	35184	1	maker-X2.17-snap-gene-16.114-mRNA-1
apterous	ap	452.9			0	35509	3	maker-X1.7-snap-gene-37.31-mRNA-1,maker-Un.16283-snap-gene-0.4-mRNA-1,augustus_masked-X1.7-abinit-gene-37.2-mRNA-1
arrowhead	Awh	452.11			0	38451	2	maker-X1.7-snap-gene-104.72-mRNA-1,maker-X1.7-snap-gene-104.71-mRNA-1
CG6617	CG6617	453.1			0	32852	1	snap_masked-A1.36-abinit-gene-4.70-mRNA-1
CG18467	CG18467	453.2			0	36958	0	NA
Ing3	Ing3	454.1			0	32853	1	maker-X2.17-snap-gene-6.73-mRNA-1
CG9293	CG9293	454.2			0	34752	1	augustus_masked-Un.14411-abinit-gene-0.1-mRNA-1
misexpression suppressor of ras 4	MESR4	454.3			0	36986	0	NA
CG7379	CG7379	454.4			0	42140	1	maker-A2.9-snap-gene-17.39-mRNA-2
phantom	phm	455.1			0	32857	0	NA
cytochrome P450-18a1	Cyp18a1	455.2			0	32858	0	NA
Autophagy-specific gene 8a	Atg8a	296.1		(1,2);	1	32001	1	augustus_masked-Un.21950-abinit-gene-4.11-mRNA-1
CCK-like receptor at 17D3	CCKLR-17D3	456.2			2	32864	0	NA
stress-sensitive B	sesB	297.1		(1,2);	1	32007	1	augustus_masked-A1.27-abinit-gene-4.18-mRNA-1
twinstar	tsr	457.2			2	37841	1	maker-X2.8-snap-gene-7.17-mRNA-1
fascetto	feo	298.1		(1,2);	1	32015	0	NA
CG6961	CG6961	458.2			2	32869	0	NA
CG7349	CG7349	459.1			0	32887	0	NA
succinate dehydrogenase B	SdhB	459.2			0	35590	4	maker-X2.13-snap-gene-4.8-mRNA-1,maker-Un.905-snap-gene-0.2-mRNA-1,augustus_masked-Un.4012-abinit-gene-0.1-mRNA-1,maker-Un.1918-augustus-gene-0.0-mRNA-1
CG7990	CG7990	460.1			0	32909	0	NA
CG3876	CG3876	460.2			0	33258	1	augustus_masked-Un.16534-abinit-gene-3.6-mRNA-1
CG15208	CG15208	299.1		(1,2);	1	32022	0	NA
CG8051	CG8051	461.2			1	32925	0	NA
outsiders	out	461.3			2	32926	0	NA
heparan sulfate 3-O sulfotransferase-B	Hs3st-B	462.1			0	32918	1	maker-Un.23371-snap-gene-1.29-mRNA-1
heparan sulfate 3-O sulfotransferase-A	Hs3st-A	462.2			0	37161	1	maker-X2.16-snap-gene-6.28-mRNA-1
sulfateless	sfl	462.3			0	38736	1	snap_masked-X1Random.1-abinit-gene-14.24-mRNA-1
CG8028	CG8028	463.1			0	32923	1	maker-A1.11-snap-gene-1.55-mRNA-1
CG8034	CG8034	463.2			0	32924	2	maker-A1.11-snap-gene-1.53-mRNA-1,maker-Un.4906-augustus-gene-0.3-mRNA-1+maker-Un.23747-augustus-gene-0.3-mRNA-1
CG8389	CG8389	463.3			0	36764	1	maker-Un.16430-augustus-gene-2.94-mRNA-1
giant fibre A	gfA	464.1			0	32928	0	NA
nicotinic acetylcholine receptor alpha 30D	nAcRalpha-30D	464.2			0	34304	1	maker-A1.22-snap-gene-1.46-mRNA-1
nicotinic acetylcholine receptor alpha 34E	nAcRalpha-34E	464.3			0	34826	1	augustus_masked-A1.22-abinit-gene-1.2-mRNA-1
Hex-t1	Hex-t1	3.1		(((1,2),3),4);	1	117364	0	NA
kekkon4	kek4	465.2			2	34718	1	snap_masked-A1.32-abinit-gene-15.4-mRNA-1
CG7896	CG7896	465.3			0	43552	1	maker-A1.29-snap-gene-9.87-mRNA-1
kek6	kek6	465.4			0	43729	1	snap_masked-X2.16-abinit-gene-20.9-mRNA-1
pacman	pcm	466.1			0	32935	2	maker-X1.5-snap-gene-10.97-mRNA-1,maker-A2.12-snap-gene-30.67-mRNA-1
Rat1	Rat1	466.2			0	33964	1	maker-X1.7-snap-gene-32.10-mRNA-1
CG30344	CG30344	30.1		((1,2),(3,4));	1	246552	0	NA
CG7222	CG7222	467.2			2	36138	1	augustus_masked-X2.8-abinit-gene-7.14-mRNA-1
CG2145	CG2145	300.1		(1,2);	1	32027	1	augustus_masked-Un.19322-abinit-gene-7.4-mRNA-1
ribosomal protein S10a	RpS10a	468.2			2	43321	0	NA
CG2076	CG2076	301.1	1	(1,2);	1	32041	2	snap_masked-A1.19-abinit-gene-1.35-mRNA-1,maker-Un.16508-augustus-gene-0.2-mRNA-1
CG12237	CG12237	469.2			2	32967	0	NA
enhancer of yellow 3	e(y)3	470.1			0	32965	1	augustus_masked-A2.1-abinit-gene-7.16-mRNA-1
d4	d4	470.2			0	35485	1	augustus_masked-X2.16-abinit-gene-19.2-mRNA-1
CG5591	CG5591	470.3			0	37795	0	NA
heat shock protein 60	Hsp60	302.1	1	(((1,2),3),4);	4	32045	3	maker-A2.12-augustus-gene-31.3-mRNA-1,maker-Un.4392-augustus-gene-0.1-mRNA-1,maker-Un.22948-snap-gene-0.1-mRNA-1
CG9573	CG9573	471.2			2	34229	0	NA
CG2053	CG2053	471.3			3	43762	0	NA
Rpt3R	Rpt3R	303.2		(1,2);	1	41190	0	NA
CG8860	CG8860	472.2			1	36310	0	NA
CG13426	CG13426	472.3			2	37312	0	NA
Klp10A	Klp10A	304.1		((1,2),3);	3	32049	1	augustus_masked-Un.16220-abinit-gene-0.4-mRNA-1
CG7140	CG7140	473.2			2	40445	0	NA
CG14231	CG14231	474.1			0	32982	1	maker-Un.21020-snap-gene-0.8-mRNA-1
CG4933	CG4933	474.2			0	39811	0	NA
CG12703	CG12703	475.1			0	32992	1	augustus_masked-A1.46-abinit-gene-25.0-mRNA-1
CG2316	CG2316	475.2			0	43772	1	snap_masked-Un.17703-abinit-gene-0.8-mRNA-1
ionotropic receptor 10a	Ir10a	306.1		(1,2);	1	32067	0	NA
CG3967	CG3967	476.2			2	39086	0	NA
CG9576	CG9576	477.1			0	33015	1	maker-Un.19322-snap-gene-7.43-mRNA-1
pineapple eye	pie	477.2			0	44315	0	NA
obstructor-A	obst-A	478.1			0	33022	0	NA
obstructor-E	obst-E	478.2			0	33806	0	NA
obstructor-B	obst-B	478.3			0	34336	1	maker-Un.14833-snap-gene-0.4-mRNA-1
gasp	Gasp	478.4			0	40745	1	maker-Un.16410-augustus-gene-0.4-mRNA-1
CG17068	CG17068	479.1			0	33024	1	maker-A1.27-augustus-gene-4.66-mRNA-1
CG5319	CG5319	479.2			0	42089	1	maker-X1.7-augustus-gene-12.51-mRNA-1
innexin 2	inx2	480.1			0	31646	2	maker-Un.19311-augustus-gene-0.3-mRNA-1,maker-A1.29-snap-gene-5.55-mRNA-1
innexin 7	inx7	480.2			0	33027	0	NA
shaking B	shakB	480.3			0	33062	0	NA
innexin 3	inx3	480.4			0	44266	0	NA
optic ganglion reduced	ogre	480.5			0	45382	1	maker-Un.18217-augustus-gene-0.9-mRNA-1
sphingosine kinase 1	Sk1	309.1		(1,2);	1	32089	0	NA
CG3209	CG3209	481.2			2	37852	2	augustus_masked-X1.1-abinit-gene-36.10-mRNA-1,maker-Un.2798-augustus-gene-0.3-mRNA-1
CG30354	CG30354	31.1		(1,2);	1	246560	0	NA
CG13994	CG13994	482.2			2	33853	0	NA
NPC1b	NPC1b	483.1			0	33072	1	maker-A1.36-augustus-gene-4.101-mRNA-1
Niemann-Pick type C-1a	Npc1a	483.2			0	34358	1	maker-A1.7-augustus-gene-0.20-mRNA-1
rhomboid	rho	311.3		((1,2),3);	1	38168	0	NA
nuclear transport factor-2-related	Ntf-2r	484.2			2	35101	0	NA
rasputin	rin	484.3			0	47998	2	maker-X1.7-augustus-gene-25.27-mRNA-1,augustus_masked-A1.46-abinit-gene-1.3-mRNA-1
CG1518	CG1518	485.1			0	33082	1	augustus_masked-A1.47-abinit-gene-5.11-mRNA-1
oligosaccharyl transferase 3	OstStt3	485.2			0	43005	1	maker-Un.4508-snap-gene-1.46-mRNA-1
Methoprene-tolerant	Met	313.1		(1,2);	1	32114	0	NA
deneddylase 1	Den1	486.2			2	36339	1	maker-X2.13-snap-gene-26.0-mRNA-1
CG31787	CG31787	315.1		((1,2),3);	1	318941	0	NA
CG40451	CG40451	487.2			4	3355107	1	augustus_masked-A1.28-abinit-gene-12.0-mRNA-1
Tim17b1	Tim17b1	487.3			3	40635	0	NA
translocase inner membrane 17	Tim17b2	487.4			2	44381	0	NA
CG2658	CG2658	488.1			0	31253	1	maker-A1.29-augustus-gene-5.49-mRNA-1
CG2025	CG2025	316.1		(1,2);	1	32143	1	augustus_masked-Un.19322-abinit-gene-2.2-mRNA-1
CG4908	CG4908	488.3			0	34360	1	maker-X1Random.2-snap-gene-16.19-mRNA-1
Rpt1	Rpt1	488.4			0	35701	2	maker-Un.12414-snap-gene-0.4-mRNA-1,maker-Un.1939-snap-gene-0.0-mRNA-1
CG3499	CG3499	488.5			0	37636	1	maker-X2.17-snap-gene-9.68-mRNA-1
CG6512	CG6512	488.6			0	39922	1	augustus_masked-X2.10-abinit-gene-0.0-mRNA-1
Rpt6R	Rpt6R	488.7			2	43635	0	NA
lethal (1) G0269	l(1)G0269	489.1			0	33107	1	augustus_masked-Un.16251-abinit-gene-0.6-mRNA-1
CG6701	CG6701	318.2	1	(1,2);	1	36550	2	maker-A1.16-augustus-gene-1.55-mRNA-1,maker-A2.11-augustus-gene-8.56-mRNA-1
CG12078	CG12078	489.3			2	38401	0	NA
CG5830	CG5830	489.4			0	39748	2	augustus_masked-Un.17388-abinit-gene-0.2-mRNA-1,maker-X2.3-augustus-gene-10.73-mRNA-1
CG3040	CG3040	490.1			0	31642	1	augustus_masked-Un.22930-abinit-gene-0.0-mRNA-1
scribbled	scrib	490.2			0	44448	1	maker-Un.19431-snap-gene-1.69-mRNA-1
CG32687	CG32687	490.3			0	31980	0	NA
flightless I	fliI	490.4			0	33110	1	augustus_masked-A1.28-abinit-gene-10.5-mRNA-1
CG16974	CG16974	490.5			0	34713	1	augustus_masked-Un.17588-abinit-gene-18.0-mRNA-1
icarus	ics	490.6			0	34774	1	maker-Un.17377-augustus-gene-8.57-mRNA-1
CG6860	CG6860	490.7			0	35041	1	maker-A1.22-augustus-gene-8.15-mRNA-1
Lap1	Lap1	490.8			0	36670	1	maker-X1.2-snap-gene-5.78-mRNA-1
Sur-8	Sur-8	490.9			0	42093	1	maker-X1.7-snap-gene-92.97-mRNA-1
chitin deacetylase-like 4	Cda4	491.1			0	33144	0	NA
chitin deacetylase-like 5	Cda5	491.2			0	33158	0	NA
ChLD3	ChLD3	491.3			0	35002	1	maker-A1.20-snap-gene-1.39-mRNA-1
vermiform	verm	491.4			0	40149	1	snap_masked-X1.1-abinit-gene-13.28-mRNA-1
serpentine	serp	491.5			0	40150	0	NA
CG30357	CG30357	32.1		(1,2);	1	246563	0	NA
CG7384	CG7384	492.2			2	34447	0	NA
CG34109	CG34109	492.3			0	4379890	2	maker-Un.16534-snap-gene-0.28-mRNA-1,maker-Un.16534-snap-gene-0.24-mRNA-1+snap_masked-Un.16534-abinit-gene-0.6-mRNA-1+maker-Un.16534-snap-gene-0.2-mRNA-1
twisted gastrulation	tsg	320.1		((1,2),3);	1	32160	0	NA
CG11374	CG11374	493.2			2	33163	0	NA
CG11376	CG11376	494.1			0	33165	1	augustus_masked-A1.20-abinit-gene-2.5-mRNA-1
CG42533	CG42533	494.2			0	34030	1	augustus_masked-A1.20-abinit-gene-1.5-mRNA-1
Na[+]/H[+] hydrogen exchanger 1	Nhe1	495.1			0	33167	1	maker-A1.16-augustus-gene-1.54-mRNA-1
Na[+]/H[+] hydrogen exchanger 3	Nhe3	495.2			0	33939	0	NA
Na[+]/H[+] hydrogen exchanger 2	Nhe2	495.3			0	35376	1	augustus_masked-A1.27-abinit-gene-1.0-mRNA-1
CG34120	CG34120	496.1			0	318066	1	snap_masked-A1.41-abinit-gene-24.15-mRNA-1
CG31689	CG31689	496.2			0	326154	0	NA
CG4822	CG4822	496.3			0	33170	0	NA
CG5853	CG5853	496.4			0	34322	1	augustus_masked-X2.17-abinit-gene-7.12-mRNA-1
CG3164	CG3164	497.1			0	33171	1	maker-Un.17588-augustus-gene-20.48-mRNA-1
CG17646	CG17646	497.2			0	33354	1	maker-A2.9-augustus-gene-0.70-mRNA-1
CG9663	CG9663	497.3			0	33541	0	NA
ABC transporter expressed in trachea	Atet	497.4			0	33636	0	NA
CG18130	CG18130	321.1		(1,2);	1	32161	1	maker-A1.29-augustus-gene-16.34-mRNA-1
CG3625	CG3625	498.2			2	33198	1	maker-A1.47-augustus-gene-1.54-mRNA-1
CG6149	CG6149	498.3			3	39277	0	NA
CG4164	CG4164	499.1			0	33220	1	maker-Un.17588-augustus-gene-17.64-mRNA-1
DnaJ homolog	DnaJ-H	499.2			0	34707	0	NA
DnaJ-like-2	Droj2	499.3			0	41646	1	maker-X1.7-snap-gene-60.120-mRNA-1
CG1492	CG1492	323.1		(1,2);	1	32164	0	NA
bicaudal	bic	500.2			2	45827	1	maker-X1.7-augustus-gene-66.2-mRNA-1
excitatory amino acid transporter 2	Eaat2	501.1			0	33247	1	maker-A1.3-augustus-gene-3.41-mRNA-1
excitatory amino acid transporter 1	Eaat1	501.2			0	34251	2	augustus_masked-Un.17588-abinit-gene-13.18-mRNA-1,augustus_masked-X1.7-abinit-gene-109.5-mRNA-1
metabotropic GABA-B receptor subtype 3	GABA-B-R3	502.1			0	33248	1	maker-Un.17588-augustus-gene-14.40-mRNA-1
metabotropic GABA-B receptor subtype 1	GABA-B-R1	502.2			0	34878	1	snap_masked-A1.28-abinit-gene-11.9-mRNA-1
metabotropic GABA-B receptor subtype 2	GABA-B-R2	502.3			0	42561	0	NA
regucalcin	regucalcin	324.1	1	(1,2);	1	32165	3	maker-A1.29-snap-gene-2.43-mRNA-1,maker-Un.64-augustus-gene-0.3-mRNA-1,maker-A1.41-snap-gene-20.35-mRNA-1
CG3534	CG3534	503.2			2	42047	1	maker-Un.17123-augustus-gene-1.31-mRNA-1
cGMP-dependent protein kinase 21D	Pkg21D	504.1			0	33253	0	NA
CG4839	CG4839	504.2			0	34348	1	maker-A1.10-snap-gene-0.20-mRNA-1
foraging	for	504.3			0	44817	1	maker-A1.22-augustus-gene-3.24-mRNA-1
kraken	kraken	505.1			0	33265	1	maker-A1.28-augustus-gene-18.52-mRNA-1
CG15735	CG15735	325.1	1	(1,2);	1	32167	2	maker-X1.7-augustus-gene-112.87-mRNA-1,maker-X1Random.2-snap-gene-4.71-mRNA-1
CG11309	CG11309	505.3			2	40356	1	snap_masked-A2.1-abinit-gene-10.54-mRNA-1
CG1950	CG1950	327.1		(1,2);	1	32173	0	NA
CG31690	CG31690	506.2			2	33455	0	NA
CG5038	CG5038	506.3			0	41867	1	maker-A1.29-augustus-gene-10.72-mRNA-1
CG1924	CG1924	328.1		(((1,2),3),4);	1	32180	0	NA
nascent polypeptide associated complex protein alpha subunit	Nacalpha	507.2			2	36409	1	maker-X1Random.2-augustus-gene-6.60-mRNA-1
Autophagy-specific gene 4	Atg4	508.1			0	33283	1	maker-Un.6473-augustus-gene-0.3-mRNA-1
CG6194	CG6194	508.2			0	41868	0	NA
CG30379	CG30379	33.1		((1,2),3),4);	4	246578	0	NA
CG34351	CG34351	509.2			2	5740672	1	maker-A1.20-snap-gene-3.22-mRNA-1+snap_masked-A1.20-abinit-gene-3.9-mRNA-1
CG2543	CG2543	331.1	1	(1,2);	1	32212	2	maker-Un.21950-snap-gene-3.81-mRNA-2,maker-Un.10839-snap-gene-0.1-mRNA-1
CG4896	CG4896	510.2			2	33305	1	snap_masked-A1.3-abinit-gene-8.16-mRNA-1
robo3	robo3	511.1			0	33314	1	augustus_masked-A1.25-abinit-gene-3.0-mRNA-1
roundabout	robo	511.2			0	37603	1	maker-Un.1540-augustus-gene-3.49-mRNA-1
leak	lea	511.3			0	44522	1	maker-A1.25-snap-gene-2.42-mRNA-1
CG14351	CG14351	512.1			0	33339	1	maker-Un.16479-augustus-gene-0.3-mRNA-1+maker-A1.21-augustus-gene-0.45-mRNA-1
CG11136	CG11136	512.2			0	37342	1	maker-Un.21403-snap-gene-2.43-mRNA-1
CG18317	CG18317	513.1			0	33350	1	maker-A1.24-snap-gene-2.12-mRNA-1
CG8026	CG8026	513.2			0	35941	1	maker-X2.1-augustus-gene-5.31-mRNA-1
CG31663	CG31663	514.1			0	33363	1	maker-A1.23-augustus-gene-2.47-mRNA-1
CG12858	CG12858	514.3			0	36634	1	augustus_masked-X1.1-abinit-gene-35.0-mRNA-1
ade5	ade5	333.1	1	(((1,2),3),4);	3	32228	2	augustus_masked-A1.45-abinit-gene-8.9-mRNA-1,maker-Un.19664-augustus-gene-0.0-mRNA-1
CG34015	CG34015	515.2			2	3885570	0	NA
glutamate oxaloacetate transaminase 2	Got2	516.1			0	33373	0	NA
glutamate oxaloacetate transaminase 1	Got1	516.2			0	36782	1	maker-A2.12-snap-gene-15.13-mRNA-1
Niemann-Pick type C-2a	Npc2a	517.1			0	33374	1	maker-Un.8142-augustus-gene-0.6-mRNA-1
Niemann-Pick type C-2b	Npc2b	517.2			0	41710	1	maker-Un.17352-snap-gene-0.6-mRNA-1
Ets at 21C	Ets21C	518.1			0	33229	1	maker-A1.14-snap-gene-1.59-mRNA-1
anterior open	aop	518.2			0	33392	1	maker-A1.23-augustus-gene-5.27-mRNA-1
Ets at 65A	Ets65A	518.3			0	38700	1	snap_masked-X2.16-abinit-gene-18.38-mRNA-1
Ecdysone-induced protein 74EF	Eip74EF	518.4			0	39962	0	NA
pointed	pnt	518.5			0	42757	1	maker-X1.7-augustus-gene-70.67-mRNA-1
Ets96B	Ets96B	518.6			0	42952	1	maker-X1Random.8-snap-gene-16.119-mRNA-1
Ets at 97D	Ets97D	518.7			0	43236	1	maker-X2.8-snap-gene-13.6-mRNA-1
Ets at 98B	Ets98B	518.8			0	43334	1	snap_masked-X1.5-abinit-gene-5.52-mRNA-1
CG12717	CG12717	334.1		((1,2),3);	1	32229	0	NA
CG16995	CG16995	519.3			3	33413	0	NA
CG34049	CG34049	519.4			2	3885620	0	NA
CG31482	CG31482	519.5			0	40806	0	NA
CG4407	CG4407	337.1		(1,2);	1	32240	0	NA
CG3609	CG3609	520.2			2	33421	0	NA
CG13280	CG13280	520.4			3	35015	0	NA
CG4404	CG4404	338.1		((1,2),3);	1	32241	0	NA
CG18173	CG18173	521.2			2	38220	0	NA
vesicular glutamate transporter	VGlut	522.1			0	33427	1	maker-A1.28-snap-gene-13.69-mRNA-1
CG4288	CG4288	522.2			0	42426	1	snap_masked-X1Random.8-abinit-gene-16.83-mRNA-1
CG30382	CG30382	34.1		(1,2);	1	246582	1	augustus_masked-X1Random.8-abinit-gene-16.18-mRNA-1
CG14013	CG14013	523.2			2	33786	0	NA
CG8138	CG8138	523.3			3	41619	0	NA
CG6978	CG6978	342.1		(1,2);	1	31413	0	NA
CG17293	CG17293	524.2			2	34153	1	augustus_masked-Un.17452-abinit-gene-0.4-mRNA-1
doublesex-Mab related 11E	dmrt11E	347.1		(1,2);	1	32291	1	snap_masked-A1.33-abinit-gene-9.15-mRNA-1
CG9883	CG9883	525.2			2	33442	0	NA
Blastoderm-specific gene 25A	Bsg25A	525.3			3	33669	0	NA
dynamin related protein 1	Drp1	526.1			0	33445	1	maker-Un.17588-augustus-gene-17.55-mRNA-1
optic atrophy 1-like	opa1-like	526.2			0	36578	1	maker-A2.5-augustus-gene-12.40-mRNA-1
shibire	shi	526.3			0	45928	1	maker-A2.12-snap-gene-22.4-mRNA-1
Rbp1-like	Rbp1-like	348.1		(1,2);	1	32293	0	NA
proteasome beta4R2 subunit	Prosbeta4R2	527.2			2	33451	0	NA
CG17331	CG17331	527.3			3	34999	1	augustus_masked-Un.23261-abinit-gene-2.20-mRNA-1
CG1998	CG1998	349.1		(1,2);	1	32300	0	NA
phosphoglycerate kinase	Pgk	528.2			2	33461	2	maker-Un.15623-augustus-gene-0.31-mRNA-2,maker-Un.14808-augustus-gene-0.0-mRNA-1
CG30398	CG30398	35.1		(1,2);	1	246591	0	NA
CG15630	CG15630	529.2			2	33676	1	snap_masked-Un.17590-abinit-gene-0.2-mRNA-1
CG12177	CG12177	350.1		((1,2),3);	1	32326	0	NA
CG34380	CG34380	530.4			2	5740323	0	NA
CG1561	CG1561	531.1			0	32108	5	maker-A1.32-augustus-gene-10.114-mRNA-1,maker-A1.32-augustus-gene-10.115-mRNA-1,maker-Un.13387-augustus-gene-0.3-mRNA-1,augustus_masked-X1.7-abinit-gene-104.0-mRNA-1,maker-A1.32-augustus-gene-10.113-mRNA-1
CG11092	CG11092	354.1		(1,2);	1	32350	0	NA
CG9259	CG9259	531.3			2	35372	0	NA
CG33966	CG33966	532.1			0	3885642	1	maker-Un.7037-augustus-gene-0.49-mRNA-1
CG2663	CG2663	532.2			0	40649	1	augustus_masked-Un.16006-abinit-gene-1.4-mRNA-1
CG5334	CG5334	359.1		(1,2);	1	32402	0	NA
TBP-associated factor 10	Taf10	533.2			2	33469	1	augustus_masked-X2.13-abinit-gene-13.5-mRNA-1
synaptotagmin 12	Syt12	534.1			0	32290	1	snap_masked-A1.33-abinit-gene-9.9-mRNA-1
synaptotagmin 1	Syt1	534.2			0	33473	1	maker-A1.46-augustus-gene-17.65-mRNA-1
synaptotagmin alpha	Sytalpha	534.3			0	35068	1	augustus_masked-A1.12-abinit-gene-4.2-mRNA-1
synaptotagmin 4	Syt4	534.4			0	40876	1	maker-A2.1-snap-gene-6.72-mRNA-1
Rim	Rim	534.5			0	42150	1	augustus_masked-Un.1980-abinit-gene-1.2-mRNA-1+maker-Un.1980-snap-gene-1.58-mRNA-1
Syt7	Syt7	534.6			0	43783	1	maker-Un.5604-augustus-gene-0.15-mRNA-1
CG30424	CG30424	36.1		((1,2),3);	1	246606	0	NA
CG7362	CG7362	535.2			3	41787	0	NA
pyruvate kinase	PyK	535.3			1	42620	3	maker-X1.7-snap-gene-68.107-mRNA-1,maker-Un.22023-augustus-gene-0.0-mRNA-1,maker-Un.15077-augustus-gene-0.0-mRNA-1
CG7069	CG7069	535.4			2	42621	0	NA
doppelganger von brummer	dob	367.1		(1,2);	1	32436	0	NA
gamma-Tubulin at 37C	gammaTub37C	536.2			2	35199	0	NA
Chromodomain-helicase-DNA-binding protein 1	Chd1	537.1			0	33505	1	augustus_masked-Un.21950-abinit-gene-3.14-mRNA-1
CG30429	CG30429	37.1		(1,2);	1	246609	0	NA
Mi-2	Mi-2	537.3			2	40170	1	maker-A1Random.66-snap-gene-16.43-mRNA-4
enhancer of bithorax	E(bx)	537.4			0	44811	1	maker-X1Random.1-augustus-gene-18.32-mRNA-1
okra	okr	538.1			0	33507	3	augustus_masked-A1.10-abinit-gene-4.4-mRNA-1,maker-Un.17038-augustus-gene-0.25-mRNA-1,maker-Un.21899-snap-gene-0.0-mRNA-1
CG5899	CG5899	538.3			0	34311	1	maker-Un.19322-augustus-gene-3.67-mRNA-1
imitation SWI	Iswi	538.4			0	36390	3	maker-X1.1-snap-gene-30.72-mRNA-2,maker-X2.8-snap-gene-1.6-mRNA-1,augustus_masked-X2.8-abinit-gene-1.1-mRNA-1
brahma	brm	538.5			0	39744	1	maker-X2.10-augustus-gene-3.62-mRNA-1
CG5662	CG5662	370.1		(1,2);	1	32450	0	NA
CG3788	CG3788	539.2			1	37644	0	NA
CG6330	CG6330	539.3			2	43240	1	maker-X1Random.2-augustus-gene-24.23-mRNA-1
protein phosphatase Y regulator 1	PPYR1	371.1		(((1,2),3),4);	4	32453	0	NA
alpha4GT2	alpha4GT2	540.2			2	43124	0	NA
CG17259	CG17259	541.1			0	33518	1	augustus_masked-A1.29-abinit-gene-16.3-mRNA-1
Seryl-tRNA synthetase	Aats-ser	541.2			0	41862	1	augustus_masked-X1Random.2-abinit-gene-27.13-mRNA-1
CG9123	CG9123	372.1		(1,2);	1	32462	0	NA
protein partner of snf	pps	542.2			2	41524	0	NA
CG42265	CG42265	543.1			0	7354434	1	maker-Un.21217-augustus-gene-0.3-mRNA-1
CG3332	CG3332	543.2			0	33539	2	maker-A1.46-augustus-gene-21.67-mRNA-1,snap_masked-A1.46-abinit-gene-20.20-mRNA-1
CG3326	CG3326	544.1			0	33544	1	maker-A1.10-augustus-gene-3.32-mRNA-1
spastin	spas	544.2			0	42846	1	maker-X1.7-augustus-gene-92.87-mRNA-1
dead box protein 80	Dbp80	545.1			0	3354919	3	maker-Un.16945-snap-gene-0.8-mRNA-1,augustus_masked-Un.16662-abinit-gene-0.8-mRNA-1,maker-Un.3738-augustus-gene-0.5-mRNA-1
helicase at 25E	Hel25E	545.2			0	33781	1	maker-Un.17377-augustus-gene-5.36-mRNA-1
eukaryotic initiation factor 4a	eIF-4a	545.3			0	33835	1	maker-Un.23261-augustus-gene-2.89-mRNA-1
maternal expression at 31B	me31B	545.4			0	34364	1	maker-A1Random.76-augustus-gene-0.3-mRNA-1
eIF4AIII	eIF4AIII	545.5			0	40987	1	augustus_masked-X1Random.3-abinit-gene-8.7-mRNA-1
CG9977	CG9977	375.2		(1,2);	1	38342	1	maker-X1.1-snap-gene-33.72-mRNA-1
Glutamine:fructose-6-phosphate aminotransferase 2	Gfat2	546.2			2	43373	0	NA
CG11655	CG11655	376.1		(1,2);	1	32472	1	augustus_masked-Un.23812-abinit-gene-1.4-mRNA-1
CG41320	CG41320	547.2			2	5740635	0	NA
CG8117	CG8117	379.1		(1,2);	1	32499	0	NA
CG4484	CG4484	548.2			2	39055	1	maker-A2Random.62-augustus-gene-13.62-mRNA-1
SP71	SP71	549.1			0	3354987	1	maker-Un.14047-snap-gene-0.3-mRNA-1+augustus_masked-Un.20089-abinit-gene-0.0-mRNA-1+maker-Un.1178-augustus-gene-0.3-mRNA-1
no mechanoreceptor potential A	nompA	549.2			0	45587	1	maker-X2.13-augustus-gene-19.43-mRNA-1
CG2893	CG2893	550.1			0	3354992	1	maker-A2.9-augustus-gene-6.74-mRNA-1
CG1090	CG1090	550.2			0	40551	1	augustus_masked-X1.7-abinit-gene-84.5-mRNA-1
Nckx30C	Nckx30C	550.3			0	45248	1	maker-A1.3-snap-gene-5.47-mRNA-1
CG17168	CG17168	551.1			0	3354996	1	maker-A1.33-snap-gene-4.62-mRNA-1
nuclear inhibitor of protein phosphatase 1	NiPp1	551.2			0	44748	1	augustus_masked-Un.6202-abinit-gene-0.0-mRNA-1
G protein-coupled receptor kinase 1	Gprk1	552.1			0	3355013	1	maker-X2.13-augustus-gene-7.44-mRNA-1
G protein-coupled receptor kinase 2	Gprk2	552.2			0	49045	1	maker-Un.6375-snap-gene-1.22-mRNA-2
CG12379	CG12379	382.1		(1,2);	1	32512	1	maker-A1.32-snap-gene-12.28-mRNA-1
CG11269	CG11269	553.2			2	37527	0	NA
CG12413	CG12413	554.1			0	43382	2	maker-X1Random.2-augustus-gene-4.63-mRNA-1,snap_masked-A2.13-abinit-gene-16.14-mRNA-1
eIF5B	eIF5B	554.2			0	44261	1	maker-X1Random.2-snap-gene-23.79-mRNA-1
CG14782	CG14782	555.1			0	31105	1	maker-X2.3-snap-gene-12.25-mRNA-1
hepatocyte growth factor regulated tyrosine kinase substrate	Hrs	555.2			0	33458	1	maker-A1.40-snap-gene-1.4-mRNA-1+maker-Un.10239-snap-gene-0.4-mRNA-1
CG41099	CG41099	555.3			0	3355072	2	maker-Un.11988-augustus-gene-0.21-mRNA-1,augustus_masked-Un.11988-abinit-gene-0.0-mRNA-1
fab1	fab1	555.4			0	37033	1	snap_masked-X2.10-abinit-gene-1.32-mRNA-1
CG5270	CG5270	555.5			0	41370	1	augustus_masked-Un.2979-abinit-gene-0.0-mRNA-1
CG6051	CG6051	555.6			0	43271	1	maker-X1Random.3-augustus-gene-0.34-mRNA-1
smad anchor for receptor activation	Sara	555.7			0	44263	1	snap_masked-Un.14300-abinit-gene-1.23-mRNA-1
CG8509	CG8509	384.1		((1,2),3);	1	32535	0	NA
synapse protein 24	Snap24	556.2			2	41193	0	NA
Apoptosis-linked gene-2	Alg-2	557.1			0	3355106	1	maker-Un.16254-augustus-gene-0.7-mRNA-1
CG17765	CG17765	557.2			0	36111	2	maker-Un.1540-augustus-gene-1.74-mRNA-1,maker-Un.6527-snap-gene-0.2-mRNA-1
Spf45	Spf45	558.1			0	3355114	1	maker-A1.24-augustus-gene-2.57-mRNA-1
poly U binding factor 68kD	pUf68	558.2			0	38173	1	maker-Un.17871-augustus-gene-0.12-mRNA-1
CG8565	CG8565	385.1		((1,2),3);	1	32538	0	NA
concertina	cta	559.2			2	3355131	1	maker-Un.16534-augustus-gene-2.111-mRNA-1
mushroom bodies tiny	mbt	560.1			0	32631	0	NA
PAK-kinase	Pak	560.2			0	44039	1	maker-A2.9-snap-gene-4.73-mRNA-1
immune response deficient 5	ird5	560.3			0	44432	1	maker-X2.13-augustus-gene-16.80-mRNA-1
MAP kinase activated protein-kinase-2	MAPk-Ak2	560.4			0	44573	1	maker-X1Random.8-snap-gene-28.66-mRNA-1
Lk6	Lk6	560.5			0	44672	1	maker-X1.7-augustus-gene-73.75-mRNA-1
CG17528	CG17528	560.6			0	3355134	1	maker-Un.14048-augustus-gene-0.3-mRNA-1
loki	lok	560.7			0	35288	1	augustus_masked-Un.549-abinit-gene-2.10-mRNA-1
Pak3	Pak3	560.8			0	41995	1	augustus_masked-Un.20964-abinit-gene-5.3-mRNA-1
protein kinase D	PKD	560.9			0	42203	2	maker-Un.18442-augustus-gene-0.3-mRNA-1,maker-X1.7-augustus-gene-54.44-mRNA-1
Calcium/calmodulin-dependent protein kinase I	CaMKI	560.10			0	43792	1	maker-A2.13-snap-gene-14.32-mRNA-2
Calcium/calmodulin-dependent protein kinase II	CaMKII	560.11			0	43828	1	maker-Un.16198-snap-gene-0.10-mRNA-1
argonaute 3	AGO3	561.1			0	3355150	1	maker-X2.13-snap-gene-9.31-mRNA-1
glyceraldehyde 3 phosphate dehydrogenase 2	Gapdh2	387.1		(1,2);	1	32545	1	maker-A1.3-augustus-gene-3.3-mRNA-1
aubergine	aub	561.3			2	34524	2	maker-X1.7-augustus-gene-30.48-mRNA-1,augustus_masked-X1.5-abinit-gene-3.1-mRNA-1
membrane steroid binding protein	MSBP	388.1		(1,2);	1	32548	1	augustus_masked-A1.46-abinit-gene-8.7-mRNA-1
CR40472	CG40472	562.2			2	8673970	1	maker-X1Random.10-snap-gene-1.9-mRNA-1
CG30503	CG30503	39.1		(1,2);	1	246656	0	NA
CG8009	CG8009	563.2			2	39204	1	maker-Un.5362-snap-gene-0.9-mRNA-1
FucTC	FucTC	564.1			0	3355171	0	NA
FucTA	FucTA	564.2			0	39653	1	maker-A2.9-snap-gene-15.100-mRNA-1
CG8931	CG8931	392.1		(1,2);	1	32564	1	augustus_masked-A2.12-abinit-gene-10.3-mRNA-1
CG13125	CG13125	565.2			2	34318	1	augustus_masked-X1.7-abinit-gene-89.2-mRNA-1
sds22	sds22	565.3			0	42091	1	maker-X2.13-augustus-gene-23.69-mRNA-1
CG5220	CG5220	394.2		(1,2);	1	42056	0	NA
CG13405	CG13405	566.2			2	38016	0	NA
CG12698	CG12698	396.1		((1,2),3);	1	32570	0	NA
scavenger receptor class C, type I	Sr-CI	567.2			1	33621	0	NA
scavenger receptor class C, type II	Sr-CII	567.3			2	44219	0	NA
scavenger receptor class C, type III	Sr-CIII	567.4			4	44382	0	NA
CG12395	CG12395	397.1		(1,2);	1	32571	0	NA
CG9394	CG9394	568.2			3	37399	0	NA
CG11619	CG11619	568.3			1	40072	0	NA
CG18135	CG18135	568.4			2	40073	0	NA
CG3942	CG3942	568.5			4	41489	0	NA
disconnected	disco	398.1		(1,2);	1	32579	0	NA
CG31108	CG31108	569.2			0	43015	2	augustus_masked-A1.30-abinit-gene-1.12-mRNA-1,augustus_masked-Un.3023-abinit-gene-0.1-mRNA-1
CG16833	CG16833	569.3			2	47729	1	maker-A1.19-augustus-gene-2.27-mRNA-1
peroxiredoxin 2540	Prx2540-1	40.1		((1,2),3);	1	246663	0	NA
echinoid	ed	570.2			2	33619	2	maker-A1.13-snap-gene-0.11-mRNA-1,maker-Un.17350-augustus-gene-0.5-mRNA-1+snap_masked-Un.17942-abinit-gene-0.1-mRNA-1
proteasome 28kD subunit 1	Pros28.1	400.1		((1,2),3);	1	32584	1	snap_masked-A1.32-abinit-gene-7.39-mRNA-1
arginine methyltransferase 8	Art8	571.2			0	34528	0	NA
arginine methyltransferase 1	Art1	571.3			4	41295	1	maker-X1.7-snap-gene-96.2-mRNA-1
arginine methyltransferase 9	Art9	571.4			1	41698	0	NA
arginine methyltransferase 6	Art6	571.5			2	41699	0	NA
arginine methyltransferase 3	Art3	571.6			0	41837	1	augustus_masked-A2.1-abinit-gene-19.6-mRNA-1
CG16857	CG16857	572.1			0	33635	1	maker-Un.17588-augustus-gene-20.46-mRNA-1
turtle	tutl	572.2			0	46015	1	maker-Un.17588-augustus-gene-20.45-mRNA-1
Trehalose-6-phosphate synthase 1	Tps1	573.1			0	33642	0	NA
CG3560	CG3560	401.1		(1,2);	1	32586	0	NA
CG5177	CG5177	573.3			2	34017	0	NA
CG15439	CG15439	574.1			0	33651	2	maker-X1Random.1-snap-gene-2.124-mRNA-1,augustus_masked-Un.19609-abinit-gene-0.0-mRNA-1
CG1845	CG1845	574.2			0	35648	1	augustus_masked-A2.10-abinit-gene-4.8-mRNA-1
rhinoceros	rno	574.3			0	38027	1	maker-X2.16-snap-gene-19.6-mRNA-1
CG3244	CG3244	575.1			0	33678	1	snap_masked-A1.20-abinit-gene-2.52-mRNA-1
CG6055	CG6055	575.2			0	34027	1	augustus_masked-A1.20-abinit-gene-2.0-mRNA-1
CG4115	CG4115	575.3			0	41499	0	NA
CG15629	CG15629	576.1			0	33679	1	maker-A1.11-augustus-gene-0.33-mRNA-1
CG9265	CG9265	576.2			0	35369	1	augustus_masked-A1.23-abinit-gene-1.9-mRNA-1
cabeza	caz	402.1		(1,2);	1	32587	0	NA
CG8602	CG8602	577.2			2	38808	1	augustus_masked-Un.18127-abinit-gene-0.0-mRNA-1
CG3008	CG3008	578.1			0	33693	1	maker-A1.46-augustus-gene-21.68-mRNA-1
CG11660	CG11660	578.2			0	39309	1	augustus_masked-X2.8-abinit-gene-10.16-mRNA-1
CG3036	CG3036	579.1			0	33695	1	augustus_masked-A1.41-abinit-gene-12.1-mRNA-1
Na[+]-dependent inorganic phosphate cotransporter	NaPi-T	579.2			0	36651	1	snap_masked-X2.4-abinit-gene-6.53-mRNA-1
CG9864	CG9864	579.3			0	37287	0	NA
beta subunit of type I geranylgeranyl transferase	betaggt-I	580.1			0	33704	1	maker-A1.47-snap-gene-6.84-mRNA-1
CG17565	CG17565	580.2			0	41989	1	maker-X1Random.2-snap-gene-30.7-mRNA-1
beta subunit of type II geranylgeranyl transferase	betaggt-II	580.3			0	47757	0	NA
CG9911	CG9911	403.1	1	(1,2);	1	32588	2	maker-Un.3023-snap-gene-0.9-mRNA-1,maker-A1.47-snap-gene-0.65-mRNA-1
Rtnl2	Rtnl2	581.2			2	40903	0	NA
viking	vkg	582.1			0	33726	0	NA
collagen type IV	Cg25C	582.2			0	33727	4	augustus_masked-A1.4-abinit-gene-5.4-mRNA-1,maker-Un.8484-augustus-gene-0.5-mRNA-1,maker-Un.17119-snap-gene-0.6-mRNA-1,maker-Un.13206-snap-gene-0.5-mRNA-1
multiplexin	mp	582.3			0	38769	1	maker-X2.13-augustus-gene-0.27-mRNA-1
CG42342	CG42342	582.4			0	7354466	1	augustus_masked-X1.7-abinit-gene-103.9-mRNA-1
Rpn11	Rpn11	583.1			0	33738	1	maker-Un.23156-augustus-gene-0.3-mRNA-1
COP9 complex homolog subunit 5	CSN5	583.2			0	42000	1	maker-X1Random.8-augustus-gene-3.37-mRNA-1
troponin C at 25D	TpnC25D	584.1			0	33752	0	NA
CG9914	CG9914	405.1	1	(1,2);	1	32592	2	maker-A2.7-snap-gene-6.83-mRNA-1,maker-Un.20046-augustus-gene-0.3-mRNA-1
troponin C isoform 4	TpnC4	584.4			4	35498	0	NA
troponin C at 47D	TpnC47D	584.5			1	36195	0	NA
troponin C at 73F	TpnC73F	584.6			2	39916	1	maker-Un.4397-snap-gene-0.37-mRNA-2
thickveins	tkv	585.1			0	33753	1	augustus_masked-A1.4-abinit-gene-3.8-mRNA-1
saxophone	sax	585.2			0	35731	1	maker-Un.16430-augustus-gene-8.38-mRNA-1
baboon	babo	585.3			0	35900	1	augustus_masked-Un.8801-abinit-gene-0.1-mRNA-1
U2 small nuclear riboprotein auxiliary factor 50	U2af50	406.1	1	(1,2);	1	32602	2	snap_masked-A2.9-abinit-gene-6.67-mRNA-1,maker-A2.9-augustus-gene-6.2-mRNA-1
Bub1-related kinase	BubR1	586.2			2	35522	2	augustus_masked-A1.32-abinit-gene-12.0-mRNA-1,maker-Un.19865-snap-gene-5.32-mRNA-1
CG14024	CG14024	587.1			0	33760	0	NA
CG13937	CG13937	587.2			0	38249	1	maker-X1Random.2-augustus-gene-4.68-mRNA-1
no on or off transient A	nonA	407.1	1	((1,2),3);	2	32603	2	maker-A2.11-augustus-gene-6.68-mRNA-1,augustus_masked-Un.9365-abinit-gene-0.0-mRNA-1
acylphosphatase	Acyp	588.2			4	34807	0	NA
CG18371	CG18371	588.3			2	36556	0	NA
acylphosphatase 2	Acyp2	588.4			3	41910	0	NA
CG11052	CG11052	588.5			5	49997	0	NA
CG34161	CG34161	588.6			1	5740441	0	NA
CG9981	CG9981	409.2		(1,2);	1	32609	0	NA
lamin C	LamC	589.2			2	36615	1	maker-Un.16974-augustus-gene-0.47-mRNA-1
forkhead domain 3F	fd3F	41.1		(1,2);	1	246673	1	snap_masked-A1.29-abinit-gene-9.34-mRNA-1
CG7251	CG7251	590.2			1	33791	0	NA
CG18266	CG18266	590.3			2	33792	0	NA
annexin X	AnnX	411.1		(1,2);	1	33019	0	NA
CG9171	CG9171	591.2			2	33807	4	augustus_masked-A2.1-abinit-gene-20.8-mRNA-1,snap_masked-Un.20611-abinit-gene-0.1-mRNA-1,snap_masked-Un.6021-abinit-gene-0.0-mRNA-1,maker-Un.17090-augustus-gene-0.3-mRNA-1
CG15483	CG15483	591.4			3	34687	0	NA
CG11147	CG11147	592.1			0	33803	1	maker-X1.7-snap-gene-84.63-mRNA-2
CG31731	CG31731	592.2			0	34783	1	augustus_masked-A2.1-abinit-gene-9.1-mRNA-1
CG33970	CG33970	592.3			0	43186	1	maker-Un.17366-snap-gene-0.13-mRNA-1
CG9990	CG9990	592.4			0	43391	1	augustus_masked-X1Random.3-abinit-gene-0.5-mRNA-1
rumi	rumi	412.1		(1,2);	1	326122	1	maker-A2.11-snap-gene-6.8-mRNA-1
CG7365	CG7365	593.2			2	40200	3	augustus_masked-A1.40-abinit-gene-0.4-mRNA-1,augustus_masked-X2.10-abinit-gene-2.5-mRNA-1,maker-Un.16187-augustus-gene-0.18-mRNA-1
CG11034	CG11034	594.1			0	33810	0	NA
CG3744	CG3744	594.2			0	42972	1	snap_masked-A2.10-abinit-gene-4.27-mRNA-1
omega	ome	594.3			0	44297	1	maker-Un.18557-augustus-gene-1.32-mRNA-1
CG34381	CG34381	595.1			0	33812	1	maker-A1.47-snap-gene-10.38-mRNA-1
Tachykinin-like receptor at 86C	Takr86C	595.2			0	41286	2	augustus_masked-X1.7-abinit-gene-48.7-mRNA-1,maker-X1.7-augustus-gene-49.31-mRNA-1
Tachykinin-like receptor at 99D	Takr99D	595.3			0	43551	0	NA
blue cheese	bchs	596.1			0	33819	1	maker-A1.28-augustus-gene-9.38-mRNA-1
CG11814	CG11814	596.2			0	38259	1	maker-X1Random.8-snap-gene-16.126-mRNA-1
CG1332	CG1332	596.3			0	38512	1	snap_masked-A2.7-abinit-gene-9.58-mRNA-1
rugose	rg	596.4			0	44531	1	augustus_masked-A1.41-abinit-gene-14.4-mRNA-1
ultraspiracle	usp	597.1			0	31165	1	maker-X2.1-snap-gene-4.95-mRNA-1
dissatisfaction	dsf	597.2			0	33823	1	maker-A1.28-snap-gene-10.6-mRNA-1
hormone receptor 51	Hr51	597.3			0	36702	1	maker-X2.7-snap-gene-3.43-mRNA-1
Hormone-receptor-like in 78	Hr78	597.4			0	40378	0	NA
hormone receptor 83	Hr83	597.5			0	40783	1	maker-A2.12-augustus-gene-29.33-mRNA-1
seven up	svp	597.6			0	41491	1	snap_masked-A1Random.74-abinit-gene-1.22-mRNA-1
tailless	tll	597.7			0	43656	1	maker-X1Random.1-snap-gene-16.8-mRNA-1
CG31477	CG31477	413.1		(1,2);	1	326144	0	NA
CG3215	CG3215	598.2			2	37672	0	NA
CG31169	CG31169	598.3			3	42624	0	NA
beta galactosidase	Gal	599.1			0	33839	0	NA
Ect3	Ect3	599.2			0	41457	4	maker-X2.14-augustus-gene-0.29-mRNA-1,maker-X1.1-snap-gene-38.44-mRNA-1,maker-Un.265-augustus-gene-0.0-mRNA-1,maker-Un.5766-augustus-gene-0.2-mRNA-1
homeodomain protein 2.0	H2.0	600.1			0	33841	1	augustus_masked-A2.10-abinit-gene-3.5-mRNA-1
CG42234	CG42234	600.2			0	38254	1	maker-X1Random.2-snap-gene-5.74-mRNA-1
neither inactivation nor afterpotential D	ninaD	415.1		((1,2),3);	1	326160	0	NA
CG8102	CG8102	601.2			1	36695	0	NA
CG11423	CG11423	601.3			2	36998	0	NA
cytochrome P450 reductase	Cpr	602.1			0	33883	1	maker-A1.29-snap-gene-1.13-mRNA-1
nitric oxide synthase	Nos	602.2			0	34495	1	maker-A1.16-augustus-gene-0.25-mRNA-1+maker-A1.16-snap-gene-0.4-mRNA-1
CG14882	CG14882	602.3			0	41994	1	maker-Un.16006-augustus-gene-0.36-mRNA-1
CG9527	CG9527	603.1			0	33898	1	augustus_masked-A1.29-abinit-gene-9.4-mRNA-1
CG17544	CG17544	603.2			0	35213	1	augustus_masked-A1.47-abinit-gene-1.3-mRNA-1
CG31860	CG31860	416.1		((1,2),3);	1	326167	1	augustus_masked-A1.4-abinit-gene-1.0-mRNA-1
CG31637	CG31637	604.2			2	33914	1	augustus_masked-A1.46-abinit-gene-8.15-mRNA-1
keren	Krn	418.1		(1,2);	1	326198	1	augustus_masked-Un.8141-abinit-gene-0.0-mRNA-1
CG11043	CG11043	605.2			2	33919	0	NA
organic anion transporting polypeptide 26F	Oatp26F	606.1			0	33927	1	maker-A1.4-augustus-gene-2.37-mRNA-1+maker-Un.17329-augustus-gene-0.6-mRNA-1
organic anion transporting polypeptide 30B	Oatp30B	606.2			0	34268	1	maker-A1.4-snap-gene-2.6-mRNA-1
tubulin tyrosine ligase-like 3B	TTLL3B	607.1			0	33946	0	NA
tubulin tyrosine ligase-like 3A	TTLL3A	607.2			0	33947	1	maker-A1.27-snap-gene-1.15-mRNA-1+maker-A1.27-snap-gene-1.14-mRNA-1
CG11221	CG11221	608.1			0	33948	1	maker-A1.28-snap-gene-9.44-mRNA-1
CG4945	CG4945	608.2			0	36850	0	NA
nervana 1	nrv1	609.1			0	33952	1	augustus_masked-Un.23261-abinit-gene-2.15-mRNA-1
nervana 2	nrv2	609.2			0	33953	0	NA
nervana 3	nrv3	609.3			0	35408	1	snap_masked-A1.22-abinit-gene-1.21-mRNA-1
CG11236	CG11236	610.1			0	33955	1	maker-Un.12734-snap-gene-0.2-mRNA-1+maker-Un.22836-snap-gene-0.4-mRNA-1
CG12338	CG12338	610.2			0	36128	1	maker-X2.3-augustus-gene-10.70-mRNA-1
Na[+]/H[+] hydrogen antiporter 1	Nha1	611.1			0	33961	0	NA
Na[+]/H[+] hydrogen antiporter 2	Nha2	611.2			0	42710	1	maker-X1.4-snap-gene-1.56-mRNA-1
neuroligin	neuroligin	612.1			0	33962	1	maker-A1.47-augustus-gene-12.100-mRNA-1
CG34127	CG34127	612.3			0	40912	1	maker-A2.5-augustus-gene-11.35-mRNA-1
CG31146	CG31146	612.4			0	40913	1	maker-A2.5-augustus-gene-10.23-mRNA-1
CG34139	CG34139	612.5			0	42402	1	maker-Un.19322-snap-gene-9.40-mRNA-1
wee	wee	613.1			0	33965	1	augustus_masked-A1.27-abinit-gene-5.6-mRNA-1
Myt1	Myt1	613.2			0	38649	1	augustus_masked-A2.11-abinit-gene-6.1-mRNA-1
nop5	nop5	614.1			0	33966	1	snap_masked-Un.16662-abinit-gene-0.40-mRNA-1
CG6876	CG6876	614.2			0	39655	1	augustus_masked-A2.13-abinit-gene-1.1-mRNA-1
Nop56	Nop56	614.3			0	42633	1	maker-Un.3078-snap-gene-1.98-mRNA-3
heterogeneous nuclear ribonucleoprotein at 27C	Hrb27C	615.1			0	33968	1	maker-Un.14883-snap-gene-0.0-mRNA-1
RNA-binding protein 6	Rbp6	615.2			0	39919	0	NA
musashi	msi	615.3			0	43087	1	maker-A2Random.1-augustus-gene-2.23-mRNA-1
CG32238	CG32238	419.1		(1,2);	1	326203	0	NA
heineken-cup	h-cup	616.2			2	41879	0	NA
Gas41	Gas41	617.1			0	33973	1	maker-X2.6-augustus-gene-2.31-mRNA-1
ENL/AF9-related	ear	617.2			0	44451	1	augustus_masked-A2.1-abinit-gene-23.4-mRNA-1
CG32351	CG32351	421.1		(1,2);	1	326209	1	augustus_masked-X1.1-abinit-gene-28.0-mRNA-1
CG4662	CG4662	618.2			0	42357	1	snap_masked-A2.9-abinit-gene-9.64-mRNA-1
CG4704	CG4704	618.3			2	42706	0	NA
Na[+]-driven anion exchanger 1	Ndae1	619.1			0	34005	1	maker-A1.3-augustus-gene-9.40-mRNA-1
CG8177	CG8177	619.2			0	39147	1	maker-X2.17-augustus-gene-22.40-mRNA-1
CG13375	CG13375	620.1			0	30976	1	augustus_masked-X2.10-abinit-gene-4.4-mRNA-1
Ras oncogene at 64B	Ras64B	620.2			0	38494	1	maker-A2.14-augustus-gene-10.93-mRNA-1
CG8519	CG8519	620.3			0	38745	2	snap_masked-X1Random.10-abinit-gene-6.19-mRNA-1,maker-A1.12-augustus-gene-1.42-mRNA-1
CG8641	CG8641	620.4			0	38771	0	NA
Ras oncogene at 85D	Ras85D	620.5			0	41140	1	augustus_masked-A2.12-abinit-gene-19.0-mRNA-1
CG8500	CG8500	620.6			0	41203	1	maker-A1.29-augustus-gene-12.73-mRNA-1
CG30158	CG30158	620.7			0	50149	0	NA
Ras-related protein	Rala	620.8			0	31332	1	maker-A1.41-snap-gene-22.3-mRNA-1
CG5160	CG5160	620.9			0	34015	1	maker-Un.23812-snap-gene-1.59-mRNA-1
Ras which interacts with calmodulin	Ric	620.10			0	36776	1	maker-X1Random.1-augustus-gene-16.58-mRNA-2
roughened	R	620.11			0	38244	2	maker-Un.12757-snap-gene-0.42-mRNA-1,augustus_masked-A2.12-abinit-gene-12.1-mRNA-1
CG32488	CG32488	422.1		(((1,2),3),(4,5));	1	326220	0	NA
peste	pes	621.2			1	34087	0	NA
CG7227	CG7227	621.3			2	34088	0	NA
slowpoke binding protein	Slob	622.1			0	34039	0	NA
CG8726	CG8726	622.2			0	35758	1	augustus_masked-X1Random.3-abinit-gene-10.11-mRNA-1
CG32557	CG32557	423.1		((1,2),3);	1	326221	0	NA
macroglobulin complement-related	Mcr	623.2			0	44071	1	augustus_masked-A1.47-abinit-gene-6.2-mRNA-1
thiolester containing protein I	TepI	623.3			4	34937	0	NA
thiolester containing protein IV	TepIV	623.4			1	35248	0	NA
CG13079	CG13079	623.5			2	35250	0	NA
thiolester containing protein III	TepIII	623.6			5	34045	1	maker-A1.27-augustus-gene-1.70-mRNA-1
CG32669	CG32669	424.1		(1,2);	1	326229	0	NA
lethal (2) 06225	l(2)06225	624.2			2	46069	0	NA
CG7115	CG7115	625.1			0	34069	12	maker-A1.22-snap-gene-5.118-mRNA-2,augustus_masked-A2.12-abinit-gene-18.5-mRNA-1,snap_masked-A2.12-abinit-gene-18.24-mRNA-1,augustus_masked-Un.19322-abinit-gene-6.4-mRNA-1,snap_masked-A2.12-abinit-gene-18.23-mRNA-1,augustus_masked-A2.8-abinit-gene-1.2-mRNA-1,maker-Un.17397-snap-gene-0.0-mRNA-1,snap_masked-A2.12-abinit-gene-18.16-mRNA-1,maker-Un.13530-snap-gene-0.2-mRNA-1,maker-X1.5-snap-gene-5.14…
CG10417	CG10417	625.2			0	35492	0	NA
transport and golgi organization 5	Tango5	425.1		(1,2);	1	326232	1	snap_masked-Un.21950-abinit-gene-4.69-mRNA-1
CG17746	CG17746	625.4			2	38400	1	augustus_masked-A2Random.62-abinit-gene-2.8-mRNA-1
CG6036	CG6036	625.5			3	43185	0	NA
alphabet	alph	625.6			4	43481	0	NA
TweedleE	TwdlE	626.1			0	34075	1	snap_masked-A1.38-abinit-gene-0.5-mRNA-1
TwdlBeta	TwdlBeta	626.2			0	36265	0	NA
Ubiquitin-5E	Ubi-p5E	426.1		(1,2);	1	326237	0	NA
TweedleT	TwdlT	626.4			2	44790	2	maker-X1Random.1-snap-gene-13.55-mRNA-1,maker-Un.15955-augustus-gene-0.4-mRNA-1
spatzle 3	spz3	627.1			0	34077	1	maker-Un.15689-augustus-gene-0.3-mRNA-1
spatzle 4	spz4	627.2			0	34572	1	maker-A1.28-snap-gene-4.25-mRNA-1
protein phosphatase 2B at 14D	Pp2B-14D	427.1		((1,2),3);	1	32624	1	maker-X2.13-snap-gene-9.32-mRNA-1
CG15283	CG15283	628.2			2	50454	0	NA
CG33056	CG33056	428.1		((1,2),3);	3	326246	0	NA
CG8668	CG8668	629.2			2	34107	1	snap_masked-X1.7-abinit-gene-104.24-mRNA-1
CG8498	CG8498	630.1			0	34111	1	augustus_masked-Un.10603-abinit-gene-0.0-mRNA-1
CG33092	CG33092	429.1		((1,2),3);	1	32625	0	NA
CG15829	CG15829	630.3			1	38782	0	NA
CG8628	CG8628	630.4			4	38783	0	NA
Diazepam-binding inhibitor	Dbi	630.5			5	38784	0	NA
CG5804	CG5804	630.6			2	39005	0	NA
hoepel1	hoe1	43.1	1	(((1,2),3),4);	4	249663	2	maker-Un.16215-augustus-gene-0.3-mRNA-1,snap_masked-Un.17588-abinit-gene-11.22-mRNA-1
CG8353	CG8353	631.2			1	34123	0	NA
CG8349	CG8349	631.3			2	34124	0	NA
CG13390	CG13390	632.1			0	34154	1	maker-A1.5-augustus-gene-0.32-mRNA-1
CG10628	CG10628	632.2			0	35263	1	augustus_masked-A1.10-abinit-gene-0.2-mRNA-1
Alanyl-tRNA synthetase	Aats-ala	633.1			0	34156	0	NA
mitochondrial alanyl-tRNA synthetase	Aats-ala-m	633.2			0	38595	1	maker-X1Random.8-snap-gene-28.15-mRNA-1
CG33116	CG33116	430.1		(1,2);	1	326259	1	maker-Un.17388-snap-gene-0.38-mRNA-1
CG9314	CG9314	634.2			2	34198	0	NA
CG9784	CG9784	431.1		(1,2);	1	32629	1	augustus_masked-X2.13-abinit-gene-6.8-mRNA-1
CG9465	CG9465	635.2			2	34204	0	NA
CG9466	CG9466	635.3			3	34205	0	NA
CG9468	CG9468	635.4			4	34206	0	NA
CG5322	CG5322	635.5			5	34436	0	NA
CG6206	CG6206	635.6			6	34437	1	snap_masked-A1.3-abinit-gene-3.13-mRNA-1
ribosomal protein S19a	RpS19a	432.1	1	(1,2);	1	32635	2	snap_masked-Un.881-abinit-gene-1.40-mRNA-1,snap_masked-Un.881-abinit-gene-1.23-mRNA-1
rolling stone	rost	636.2			2	34222	0	NA
CG9555	CG9555	636.3			3	34223	0	NA
CG17906	CG17906	636.4			4	34224	0	NA
CG4480	CG4480	636.5			5	34864	0	NA
CG32568	CG32568	434.1		(1,2);	1	32659	0	NA
CG42368	CG42368	637.2			2	7354433	1	maker-A1.47-snap-gene-7.44-mRNA-1
Arpc3B	Arpc3B	437.1		(1,2);	1	32696	0	NA
tehao	Tehao	638.2			3	34761	0	NA
MstProx	MstProx	638.3			1	40890	0	NA
Toll-4	Toll-4	638.4			2	34235	0	NA
ribosomal protein S5a	RpS5a	438.1		(1,2);	1	32700	0	NA
borealin-related	borr	639.2			2	34245	0	NA
Cyclin-dependent kinase subunit 30A	Cks30A	640.1			0	34250	1	maker-Un.17588-snap-gene-13.98-mRNA-1
Cyclin-dependent kinase subunit 85A	Cks85A	640.2			0	41034	1	maker-A2.8-augustus-gene-0.87-mRNA-1
aldehyde dehydrogenase	Aldh	641.1			0	34256	1	augustus_masked-A2.12-abinit-gene-25.11-mRNA-1
CG8665	CG8665	641.2			0	35407	1	maker-X1Random.38-augustus-gene-2.77-mRNA-1
CG31075	CG31075	641.3			0	43244	2	maker-X1Random.1-augustus-gene-13.45-mRNA-1,snap_masked-X1Random.8-abinit-gene-24.32-mRNA-1
CG1582	CG1582	439.1		(1,2);	1	32021	0	NA
gcm2	gcm2	642.2			2	34280	1	maker-Un.7147-snap-gene-1.2-mRNA-1
RPS6-protein kinase-II	S6kII	643.1			0	33139	0	NA
protein kinase-like 17E	Pk17E	643.2			0	45970	0	NA
cAMP-dependent protein kinase 1	Pka-C1	643.3			0	34284	0	NA
RPS6-p70-protein kinase	S6k	643.4			0	38654	1	maker-X1.5-snap-gene-6.81-mRNA-2
JIL-1	JIL-1	643.5			0	39241	1	maker-X1Random.8-augustus-gene-33.64-mRNA-1
cAMP-dependent protein kinase 3	Pka-C3	643.6			0	39733	0	NA
CG32944	CG32944	643.7			0	40560	1	augustus_masked-X1Random.3-abinit-gene-16.10-mRNA-1
presidents-cup	p-cup	440.1		((1,2),(3,4),5);	5	32727	0	NA
cAMP-dependent protein kinase 2	Pka-C2	643.9			2	43644	0	NA
CG5703	CG5703	442.1	1	(1,2);	1	32740	2	augustus_masked-Un.7478-abinit-gene-1.2-mRNA-1,maker-Un.14190-augustus-gene-1.33-mRNA-1
CG18854	CG18854	644.2			2	59212	0	NA
unc-4	unc-4	444.1		(1,2);	1	32757	1	maker-A2.5-augustus-gene-1.63-mRNA-1
CG4594	CG4594	645.2			1	34316	0	NA
CG4592	CG4592	645.3			2	34317	0	NA
CG5850	CG5850	646.1			0	34327	2	snap_masked-Un.21000-abinit-gene-0.1-mRNA-1,maker-Un.8374-snap-gene-0.4-mRNA-1
CG12004	CG12004	646.2			0	38185	1	maker-X1.7-augustus-gene-38.57-mRNA-1
pendulin	Pen	647.1			0	34338	1	maker-Un.16534-augustus-gene-1.71-mRNA-1
Ucp4A	Ucp4A	447.1		((1,2),3);	3	32764	1	maker-Un.16441-snap-gene-0.41-mRNA-1
karyopherin alpha1	Kap-alpha1	647.3			0	40160	1	augustus_masked-X1.7-abinit-gene-75.4-mRNA-1
karyopherin alpha3	Kap-alpha3	647.4			2	41158	1	maker-X1.5-augustus-gene-10.80-mRNA-1
ribosomal protein L7	RpL7	648.1			0	34352	1	maker-Un.5487-snap-gene-0.4-mRNA-1
CG5317	CG5317	648.2			0	34625	0	NA
CG5731	CG5731	649.1			0	34355	0	NA
CG7997	CG7997	649.2			0	36829	3	maker-Un.18557-augustus-gene-5.33-mRNA-1,maker-A2.7-augustus-gene-6.57-mRNA-1,maker-Un.15044-snap-gene-0.0-mRNA-1
ariadne	ari-1	448.1	1	(1,2);	1	32796	3	augustus_masked-A2.10-abinit-gene-3.9-mRNA-1,snap_masked-Un.2945-abinit-gene-0.2-mRNA-1,snap_masked-Un.8494-abinit-gene-0.1-mRNA-1
proteasome alpha6T subunit	Prosalpha6T	650.2			2	34726	0	NA
eEF1delta	eEF1delta	651.1			0	34363	1	maker-Un.16735-snap-gene-0.12-mRNA-1
elongation factor 1 beta	Ef1beta	651.2			0	45249	1	maker-X2.4-augustus-gene-4.71-mRNA-1
sevenless	sev	652.1			0	32039	1	maker-A1.29-augustus-gene-8.91-mRNA-1
Ror	Ror	652.2			0	34367	1	maker-A2.13-augustus-gene-15.53-mRNA-1
neurospecific receptor kinase	Nrk	652.3			0	36445	1	maker-A1Random.118-snap-gene-1.57-mRNA-1
Insulin-like receptor	InR	652.4			0	42549	1	snap_masked-A2.11-abinit-gene-10.63-mRNA-1
Alk	Alk	652.6			0	53425	1	maker-A2.13-snap-gene-14.0-mRNA-1
Mob3	Mob3	653.1			0	34372	1	maker-X1.1-augustus-gene-34.40-mRNA-1
Mob2	Mob2	653.2			0	39293	1	maker-A1.42-snap-gene-2.3-mRNA-1
mob as tumor suppressor	mats	653.3			0	42634	1	augustus_masked-Un.22167-abinit-gene-0.3-mRNA-1
CG5604	CG5604	654.1			0	34378	1	maker-Un.16534-augustus-gene-2.107-mRNA-1
CG42574	CG42574	654.2			0	40596	1	snap_masked-Un.7925-abinit-gene-0.1-mRNA-1+maker-Un.21950-augustus-gene-2.33-mRNA-1
GATAd	GATAd	655.1			0	34395	1	maker-Un.14083-augustus-gene-0.4-mRNA-1
grain	grn	655.2			0	40962	1	maker-A1.33-augustus-gene-6.39-mRNA-1
frequenin 1	Frq1	449.1		(1,2);	1	32797	0	NA
GATAe	GATAe	655.4			2	41945	0	NA
pannier	pnr	655.5			0	44849	2	augustus_masked-A2.12-abinit-gene-29.0-mRNA-1,snap_masked-A2.12-abinit-gene-28.46-mRNA-1
bruno-2	bru-2	45.1		(1,2);	1	250811	0	NA
Selenide,water dikinase	SelD	656.2			2	36587	1	maker-X1.7-augustus-gene-29.43-mRNA-1
CG5022	CG5022	657.1			0	34398	1	maker-A1Random.27-snap-gene-0.9-mRNA-1
yurt	yrt	657.2			0	41656	1	augustus_masked-X1.7-abinit-gene-106.4-mRNA-1
CG34347	CG34347	657.3			0	5740668	1	maker-Un.549-snap-gene-1.51-mRNA-1
HES-related	Her	450.1		(((((1,2),3),4),5),6);	6	32800	0	NA
CG2528	CG2528	658.2			2	35435	0	NA
CG5188	CG5188	659.1			0	34428	0	NA
CG13630	CG13630	659.2			0	42943	2	snap_masked-Un.16775-abinit-gene-0.1-mRNA-1,snap_masked-Un.11194-abinit-gene-0.2-mRNA-1
CG5343	CG5343	660.1			0	34429	1	augustus_masked-A2.9-abinit-gene-0.12-mRNA-1
CG17118	CG17118	660.2			0	34478	0	NA
CG6361	CG6361	451.1		(1,2);	1	32831	0	NA
RluA-2	RluA-2	661.3			2	34440	0	NA
myosin 31DF	Myo31DF	662.1			0	34445	1	maker-A2.1-snap-gene-8.73-mRNA-1
myosin 61F	Myo61F	662.2			0	38153	0	NA
CCK-like receptor at 17D1	CCKLR-17D1	456.1	1	(1,2);	1	32860	2	augustus_masked-A1.33-abinit-gene-9.6-mRNA-1,maker-A1.33-augustus-gene-8.29-mRNA-1
Dpy-30-like 2	Dpy-30L2	663.2			2	38480	0	NA
CG6873	CG6873	457.1		(1,2);	1	32861	0	NA
porin	porin	664.2			2	34500	1	maker-A1.20-augustus-gene-2.3-mRNA-1
DNZDHHC/NEW1 zinc finger protein 11	Dnz1	665.1			0	34503	1	maker-A1.18-augustus-gene-3.60-mRNA-1
CG8314	CG8314	665.2			0	36757	1	maker-X2.3-snap-gene-14.83-mRNA-1
SCAR	SCAR	666.1			0	34519	1	snap_masked-Un.16534-abinit-gene-1.53-mRNA-1
GUK-holder	gukh	666.2			0	53563	1	maker-A1.35-snap-gene-2.48-mRNA-1
CG6287	CG6287	667.1			0	34554	1	maker-Un.16867-snap-gene-0.5-mRNA-1
C-terminal binding protein	CtBP	667.2			0	41602	1	augustus_masked-X1.7-abinit-gene-14.7-mRNA-1
CG18259	CG18259	458.1		(1,2);	1	32866	1	augustus_masked-A1.32-abinit-gene-10.24-mRNA-1
spalt major	salm	668.2			2	34569	2	maker-A1.28-augustus-gene-3.16-mRNA-1,maker-A1.28-snap-gene-2.3-mRNA-1
kekkon-2	kek2	669.1			0	34582	1	maker-Un.17588-snap-gene-13.13-mRNA-1
kekkon-1	kek1	669.2			0	34688	1	maker-A1.10-snap-gene-5.0-mRNA-1
kekkon-3	kek3	669.3			0	34912	1	augustus_masked-Un.16742-abinit-gene-0.0-mRNA-1
CG14196	CG14196	461.1	1	((1,2),3);	3	32915	3	maker-Un.12920-snap-gene-0.4-mRNA-1,maker-Un.23611-snap-gene-0.4-mRNA-1,maker-A1.11-augustus-gene-1.43-mRNA-1
CG4988	CG4988	670.2			1	34586	0	NA
CG10467	CG10467	670.3			4	38697	1	augustus_masked-X2.16-abinit-gene-6.3-mRNA-1
CG32444	CG32444	670.4			2	40406	0	NA
CG10996	CG10996	670.5			5	32345	0	NA
kekkon5	kek5	465.1		(1,2);	1	32930	1	maker-A1.33-snap-gene-13.83-mRNA-1
escl	escl	671.2			2	34611	4	snap_masked-A1Random.66-abinit-gene-7.9-mRNA-1,maker-Un.8864-snap-gene-0.4-mRNA-1,augustus_masked-Un.19748-abinit-gene-0.0-mRNA-1,maker-Un.15331-augustus-gene-0.2-mRNA-1
CG14934	CG14934	672.1			0	34597	0	NA
CG14935	CG14935	672.2			0	34598	0	NA
rhodopsin 5	Rh5	673.1			0	34615	0	NA
rhodopsin 7	Rh7	673.2			0	39389	1	augustus_masked-X1Random.2-abinit-gene-25.13-mRNA-1
CG12231	CG12231	467.1		(1,2);	1	32942	0	NA
rhodopsin 3	Rh3	673.4			2	42398	3	snap_masked-A1.18-abinit-gene-3.20-mRNA-1,augustus_masked-A1.18-abinit-gene-3.11-mRNA-1,snap_masked-A1.18-abinit-gene-3.46-mRNA-1
translocase of outer membrane 70	Tom70	674.1			0	34618	1	augustus_masked-A1.46-abinit-gene-24.7-mRNA-1
CG14894	CG14894	674.2			0	41993	1	augustus_masked-Un.16662-abinit-gene-0.13-mRNA-1
translocase of outer membrane 34	Tom34	674.3			0	44910	1	maker-A2.12-augustus-gene-6.104-mRNA-1
CG6712	CG6712	675.1			0	34631	1	augustus_masked-Un.15623-abinit-gene-0.1-mRNA-1
CG11920	CG11920	675.2			0	43009	1	maker-X1Random.2-augustus-gene-23.63-mRNA-1
ribosomal protein S10b	RpS10b	468.1		(1,2);	1	32953	1	augustus_masked-Un.3423-abinit-gene-0.0-mRNA-1
CG11911	CG11911	676.2			2	33206	0	NA
CG16996	CG16996	676.3			3	34637	0	NA
CG16997	CG16997	676.4			4	34638	0	NA
CG7142	CG7142	676.5			5	42194	0	NA
organic anion transporting polypeptide 33Ea	Oatp33Ea	677.1			0	34660	1	maker-A1.23-augustus-gene-3.25-mRNA-1
CG14212	CG14212	469.1		(1,2);	1	32964	0	NA
organic anion transporting polypeptide 58Db	Oatp58Db	677.3			2	37544	0	NA
organic anion transporting polypeptide 58Dc	Oatp58Dc	677.4			3	37545	1	maker-X1Random.3-augustus-gene-1.17-mRNA-1
organic anion transporting polypeptide 74D	Oatp74D	677.5			0	39954	1	augustus_masked-Un.16315-abinit-gene-0.0-mRNA-1+augustus_masked-X1.7-abinit-gene-31.6-mRNA-1
CG31468	CG31468	47.1		(1,2);	1	251937	0	NA
Aly	Aly	678.2			2	44029	1	augustus_masked-X2.13-abinit-gene-13.0-mRNA-1
CG14213	CG14213	471.1	1	((1,2),3);	1	32966	2	augustus_masked-A2.9-abinit-gene-5.11-mRNA-1,maker-Un.12162-augustus-gene-0.0-mRNA-1
POU domain protein 2	pdm2	679.2			2	34673	0	NA
ventral veins lacking	vvl	679.3			0	38752	1	augustus_masked-X1Random.8-abinit-gene-35.0-mRNA-1
CG17036	CG17036	680.1			0	34679	1	maker-Un.1540-augustus-gene-2.35-mRNA-1
Sec61gamma	Sec61gamma	472.1		((1,2),3);	3	32968	0	NA
CG6574	CG6574	680.3			2	41308	1	augustus_masked-A2.7-abinit-gene-12.23-mRNA-1
zwischenferment	Zw	473.1	1	(1,2);	1	32974	5	maker-Un.7478-augustus-gene-1.35-mRNA-1,augustus_masked-Un.3895-abinit-gene-0.0-mRNA-1+augustus_masked-Un.6123-abinit-gene-0.1-mRNA-1,augustus_masked-Un.5200-abinit-gene-0.0-mRNA-1,maker-Un.9930-snap-gene-0.4-mRNA-1,maker-Un.7500-snap-gene-0.4-mRNA-1
CG5792	CG5792	681.2			2	34685	1	maker-A1.46-augustus-gene-18.73-mRNA-1
CG17003	CG17003	476.1		(1,2);	1	33006	0	NA
ACXD	ACXD	682.2			5	38284	1	maker-X2Random.32-augustus-gene-2.25-mRNA-1
ACXE	ACXE	682.3			4	53426	0	NA
ACXB	ACXB	682.4			1	53427	0	NA
ACXA	ACXA	682.5			2	53432	0	NA
juvenile hormone epoxide hydrolase 1	Jheh1	48.1		((1,2),3);	1	251984	0	NA
[truncated: 6,623 more rows]
