# Supplementary material for: Genomic signatures of globally enhanced gene duplicate accumulation in the megadiverse higher Diptera fueling intralocus sexual conflict resolution
Source: PeerJ. 2020 Oct 12;8:e10012. doi: 10.7717/peerj.10012 (PMC7560327; doi:10.7717/peerj.10012)
Supplement: Supplemental Information 5 [file peerj-08-10012-s005.xlsx]

## Sheet: StudyList.ReferenceList
Supplmentary Data 5. Study lists and Reference lists in every round of GO analysis. Gene number A (B) represents the total number of genes in the input list (A) and the number of genes which
have biological process (BP) GO annotations available in the FlyBase GO annotation file (B).
A. Insect lineage-specific duplicates
Comparison group	Study list	Gene number	Reference list	Gene number	Number of significant over- and	Results
		A (B)		A (B)	under-represented BP GO terms
1	Drosophila-specific duplicates	1790 (1403)	All Drosophila genes	8598 (6497)	43, 206	Insects_GO_BP_summary_dupover/under[Field C]
2	Anopheles-specific duplicates	1030 (841)	Drosophila orthologs of All Anopheles genes	7907 (6053)	183, 33	Insects_GO_BP_summary_dupover/under[Field D]
3	Tribolium-specific duplicates	1058 (860)	Drosophila orthologs of All Tribolium genes	8056 (6148)	81, 101	Insects_GO_BP_summary_dupover/under[Field E]
4	Apis-specific duplicates	509 (426)	Drosophila orthologs of All Apis genes	7376 (5674)	73, 19	Insects_GO_BP_summary_dupover/under[Field F]
B. Diptera duplicates
Comparison group	Study list	Gene number	Reference list	Gene number	Number of significant over- and	Results
		A (B)		A (B)	under-represented BP GO terms
1	Drosophila-specific duplicates	1790 (1403)	All Drosophila genes	8598 (6497)	43, 206	Diptera_GO_BP_summary_dupover/under[Field C]
2	Brachycera-specific duplicates	1516 (1167)	All Drosophila genes	8598 (6497)	37, 195	Diptera_GO_BP_summary_dupover/under[Field D]
3	Brachycera-specific duplicates	1517 (1167)	Drosophila duplicates	1790 (1403)	0, 13	Diptera_GO_BP_summary_dupover/under[Field E]
4	Pre-Brachycera-specific duplicates	274 (234)	All Drosophila genes	8598 (6497)	4, 0	Diptera_GO_BP_summary_dupover/under[Field F]
5	Pre-Brachycera-specific duplicates	275 (234)	Drosophila duplicates	1790 (1403)	25, 0	Diptera_GO_BP_summary_dupover/under[Field G]

## Sheet: Insects_GO_BP_summary_dupover
#GO_id	GO_term	DmelDupBPover	AgamDupBPover	TcasDupBPover	AmelDupBPover
GO:0000902	cell morphogenesis		0.042291
GO:0000904	cell morphogenesis involved in differentiation		0.0081145
GO:0001700	embryonic development via the syncytial blastoderm		1.9453e-06
GO:0001736	establishment of planar polarity		0.0070059
GO:0001738	morphogenesis of a polarized epithelium		0.018624
GO:0001748	optic lobe placode development		6.9509e-05
GO:0001763	morphogenesis of a branching structure		0.014406
GO:0002009	morphogenesis of an epithelium		0.033946
GO:0002682	regulation of immune system process				0.0093968
GO:0002683	negative regulation of immune system process		0.0002602
GO:0002759	regulation of antimicrobial humoral response				0.00026687
GO:0002831	regulation of response to biotic stimulus				0.00055994
GO:0002920	regulation of humoral immune response				0.00026687
GO:0003006	developmental process involved in reproduction		0.0063239
GO:0003007	heart morphogenesis		3.8066e-05
GO:0003151	outflow tract morphogenesis		1.8634e-06
GO:0005975	carbohydrate metabolic process	2.4197e-05		1.4292e-16	0.0023529
GO:0005996	monosaccharide metabolic process	1.1932e-05	0.030927	1.3336e-07	3.6697e-06
GO:0006006	glucose metabolic process	0.00027946	0.0081665	0.00034537	2.4357e-07
GO:0006007	glucose catabolic process	0.00072751	0.0040441	0.0019837	3.9722e-06
GO:0006022	aminoglycan metabolic process			0.031244
GO:0006030	chitin metabolic process			0.0042037
GO:0006066	alcohol metabolic process	0.00023038		2.1323e-05	4.1944e-09
GO:0006071	glycerol metabolic process	0.01232
GO:0006081	cellular aldehyde metabolic process			9.6701e-05
GO:0006082	organic acid metabolic process		0.012197	0.00037395
GO:0006091	generation of precursor metabolites and energy	0.0022247		0.0057681	4.1944e-09
GO:0006096	glycolysis	2.0326e-05		6.5744e-05	1.251e-07
GO:0006098	pentose-phosphate shunt		0.0002602
GO:0006119	oxidative phosphorylation				0.010185
GO:0006122	mitochondrial electron transport, ubiquinol to cytochrome c				4.5595e-07
GO:0006164	purine nucleotide biosynthetic process	0.03223		0.013754
GO:0006508	proteolysis	6.6874e-06	2.31e-06	0.00069874
GO:0006626	protein targeting to mitochondrion	0.0072805
GO:0006629	lipid metabolic process		0.0056872	1.2222e-07	4.1944e-09
GO:0006631	fatty acid metabolic process		1.959e-05	0.0014617
GO:0006633	fatty acid biosynthetic process		0.00047765
GO:0006643	membrane lipid metabolic process		0.017612	0.00012363
GO:0006644	phospholipid metabolic process				0.038144
GO:0006665	sphingolipid metabolic process			1.8421e-05
GO:0006720	isoprenoid metabolic process			0.0015468	8.511e-08
GO:0006732	coenzyme metabolic process		0.0041352	0.011708	0.0071687
GO:0006733	oxidoreduction coenzyme metabolic process		4.7203e-07
GO:0006739	NADP metabolic process		0.0002602
GO:0006740	NADPH regeneration		0.0002602
GO:0006810	transport		0.027152		0.00016528
GO:0006811	ion transport	0.00072751	0.00043416	0.0014106	0.00021169
GO:0006812	cation transport		0.015496	0.035213	0.0015203
GO:0006814	sodium ion transport		0.034901	0.0016745	2.3278e-06
GO:0006817	phosphate transport		0.00088051	5.3051e-07
GO:0006818	hydrogen transport	4.7495e-07	0.0044119
GO:0006820	anion transport	0.00089136	3.7029e-05	1.2923e-05	0.00016528
GO:0006835	dicarboxylic acid transport	0.00086884
GO:0006839	mitochondrial transport	7.1441e-05
GO:0006909	phagocytosis		0.0085866		0.0034767
GO:0006911	phagocytosis, engulfment		0.012603		0.010501
GO:0006915	apoptosis		0.0032007
GO:0006935	chemotaxis		7.8814e-06
GO:0006950	response to stress		0.0063587		0.019112
GO:0006952	defense response		0.0090105		0.0064972
GO:0006959	humoral immune response		0.04973
GO:0006979	response to oxidative stress		0.015384		0.0024428
GO:0006997	nucleus organization		7.6824e-06
GO:0007018	microtubule-based movement				0.00064072
GO:0007155	cell adhesion		3.3271e-05
GO:0007156	homophilic cell adhesion		9.2225e-11
GO:0007164	establishment of tissue polarity		0.0070059
GO:0007218	neuropeptide signaling pathway			0.0079574
GO:0007283	spermatogenesis		0.0057412
GO:0007289	spermatid nucleus differentiation		3.3403e-07
GO:0007409	axonogenesis		6.9509e-05
GO:0007411	axon guidance		1.2449e-05
GO:0007413	axonal fasciculation		1.0833e-05
GO:0007420	brain development		0.012197
GO:0007431	salivary gland development		0.0002969	0.0093489
GO:0007435	salivary gland morphogenesis		0.0075346	0.0012913
GO:0007507	heart development		0.013554
GO:0007548	sex differentiation		0.045888
GO:0007559	histolysis		0.046933	5.6902e-05
GO:0007568	aging				0.0063606
GO:0007600	sensory perception				0.037636
GO:0007601	visual perception		0.025421
GO:0008037	cell recognition		4.7053e-07
GO:0008038	neuron recognition		8.3254e-06
GO:0008105	asymmetric protein localization		0.0020223
GO:0008152	metabolic process	0.00016285		1.2923e-05
GO:0008219	cell death			0.0016745
GO:0008258	head involution		0.012197
GO:0008340	determination of adult lifespan				0.0057292
GO:0008354	germ cell migration		0.0076207
GO:0008406	gonad development		0.04237
GO:0008610	lipid biosynthetic process		0.030927		0.032366
GO:0008654	phospholipid biosynthetic process				0.0050644
GO:0009116	nucleoside metabolic process			0.0068447
GO:0009123	nucleoside monophosphate metabolic process			0.0038376
GO:0009124	nucleoside monophosphate biosynthetic process			0.0023162
GO:0009152	purine ribonucleotide biosynthetic process			0.0019837
GO:0009156	ribonucleoside monophosphate biosynthetic process			0.00037395
GO:0009161	ribonucleoside monophosphate metabolic process			0.00037395
GO:0009165	nucleotide biosynthetic process			0.000308
GO:0009260	ribonucleotide biosynthetic process			0.00018694
GO:0009308	amine metabolic process			0.03435
GO:0009581	detection of external stimulus				0.030011
GO:0009582	detection of abiotic stimulus				0.026523
GO:0009583	detection of light stimulus				0.017888
GO:0009605	response to external stimulus		0.007137
GO:0009607	response to biotic stimulus		1.8634e-06		0.020246
GO:0009611	response to wounding		9.2225e-11
GO:0009617	response to bacterium		1.9656e-08	0.0012492
GO:0009628	response to abiotic stimulus				0.035272
GO:0009790	embryo development		0.047447
GO:0009792	embryo development ending in birth or egg hatching		3.3012e-06
GO:0009888	tissue development		0.018758
GO:0010165	response to X-ray		4.7541e-08
GO:0010212	response to ionizing radiation		2.0506e-05
GO:0010259	multicellular organismal aging				0.0063606
GO:0010466	negative regulation of peptidase activity		2.4636e-12
GO:0010623	developmental programmed cell death		0.00075997
GO:0010721	negative regulation of cell development		0.018758
GO:0010941	regulation of cell death		0.041469
GO:0010942	positive regulation of cell death		0.0025299
GO:0010951	negative regulation of endopeptidase activity		9.2225e-11
GO:0010952	positive regulation of peptidase activity			0.036836
GO:0012501	programmed cell death		0.047659	0.0044601
GO:0015672	monovalent inorganic cation transport	0.00088227	0.00011625	0.0036651	0.00012265
GO:0015698	inorganic anion transport		0.04237	7.0549e-07
GO:0015711	organic anion transport	0.0032008	0.008895
GO:0015849	organic acid transport	0.024245			0.001504
GO:0015980	energy derivation by oxidation of organic compounds				0.0020117
GO:0015985	energy coupled proton transport, down electrochemical gradient	0.0072445
GO:0015986	ATP synthesis coupled proton transport	0.0072445
GO:0015988	energy coupled proton transport, against electrochemical gradient	1.9484e-05
GO:0015991	ATP hydrolysis coupled proton transport	1.9484e-05
GO:0015992	proton transport	4.7495e-07	0.0044119
GO:0016042	lipid catabolic process			0.00021655
GO:0016052	carbohydrate catabolic process	4.3631e-05	0.0022452	2.0398e-06	6.3467e-08
GO:0016265	death			0.0027202
GO:0016271	tissue death		0.046933	5.6902e-05
GO:0016311	dephosphorylation	9.3173e-05
GO:0016318	ommatidial rotation		0.00012384
GO:0016337	cell-cell adhesion		3.2293e-09
GO:0016339	calcium-dependent cell-cell adhesion		4.172e-08
GO:0016485	protein processing		0.00024875
GO:0018130	heterocycle biosynthetic process			0.016765
GO:0019318	hexose metabolic process	6.6874e-06	0.022861	2.2957e-08	3.3916e-07
GO:0019320	hexose catabolic process	0.00072751	0.0040441	0.0019837	3.9722e-06
GO:0019362	pyridine nucleotide metabolic process		5.5932e-06
GO:0019400	alditol metabolic process	0.01232
GO:0019637	organophosphate metabolic process				0.0040846
GO:0019748	secondary metabolic process		0.036866		0.0094944
GO:0019752	carboxylic acid metabolic process		0.012197	0.00037395
GO:0019953	sexual reproduction		0.045746
GO:0022610	biological adhesion		3.3271e-05
GO:0022612	gland morphogenesis		0.0075346	0.0012913
GO:0022900	electron transport chain				0.010185
GO:0022904	respiratory electron transport chain				0.0089731
GO:0030001	metal ion transport				0.017327
GO:0030182	neuron differentiation		0.032335
GO:0030707	ovarian follicle cell development		0.0050022
GO:0030720	oocyte localization involved in germarium-derived egg chamber formation		0.0002602
GO:0031099	regeneration		1.3268e-05
GO:0031175	neuron projection development		0.0096296
GO:0032787	monocarboxylic acid metabolic process		9.9198e-08	3.658e-06
GO:0032989	cellular component morphogenesis		0.012784
GO:0034220	ion transmembrane transport	0.010492	0.0022452	0.00046697	8.9088e-05
GO:0034404	nucleobase, nucleoside and nucleotide biosynthetic process			0.00092168
GO:0034654	nucleobase, nucleoside, nucleotide and nucleic acid biosynthetic process			0.00092168
GO:0035070	salivary gland histolysis		0.022222	1.4625e-05
GO:0035071	salivary gland cell autophagic cell death			5.6902e-05
GO:0035146	tube fusion		0.00031098
GO:0035147	branch fusion, open tracheal system		0.00031098
GO:0035272	exocrine system development		0.0002969	0.0093489
GO:0035435	phosphate transmembrane transport		0.00088051	5.3051e-07
GO:0035725	sodium ion transmembrane transport			0.0085001	1.5743e-05
GO:0040011	locomotion		0.011591
GO:0040012	regulation of locomotion		0.0017361
GO:0042060	wound healing		9.2225e-11
GO:0042067	establishment of ommatidial planar polarity		0.013219
GO:0042180	cellular ketone metabolic process		0.0096296	0.0011957
GO:0042221	response to chemical stimulus		0.013925
GO:0042330	taxis		0.00060398
GO:0042742	defense response to bacterium		0.00029821	0.0014552
GO:0042773	ATP synthesis coupled electron transport				0.034314
GO:0042775	mitochondrial ATP synthesis coupled electron transport				0.026523
GO:0043067	regulation of programmed cell death		0.027774
GO:0043068	positive regulation of programmed cell death		0.0025299
GO:0043086	negative regulation of catalytic activity		1.3521e-07
GO:0043436	oxoacid metabolic process		0.012197	0.00037395
GO:0043648	dicarboxylic acid metabolic process	0.00085835
GO:0043900	regulation of multi-organism process				0.0023529
GO:0044092	negative regulation of molecular function		4.172e-08
GO:0044242	cellular lipid catabolic process		0.0039342	2.0398e-06
GO:0044255	cellular lipid metabolic process		0.00092887	1.2923e-05	4.6385e-07
GO:0044262	cellular carbohydrate metabolic process	4.7495e-07		2.4065e-06	0.0025022
GO:0044271	cellular nitrogen compound biosynthetic process			0.026929
GO:0044275	cellular carbohydrate catabolic process	0.00088227	0.012197	0.00046034	8.542e-07
GO:0044281	small molecule metabolic process			0.00046034	0.011334
GO:0044283	small molecule biosynthetic process			0.0093304
GO:0045333	cellular respiration				0.00064072
GO:0045454	cell redox homeostasis	0.0022247
GO:0045465	R8 cell differentiation		0.00092887
GO:0045466	R7 cell differentiation		0.04973
GO:0045595	regulation of cell differentiation		0.0025299
GO:0045596	negative regulation of cell differentiation		0.012827
GO:0046164	alcohol catabolic process	0.00070566	0.012197	0.0090708	1.0057e-06
GO:0046365	monosaccharide catabolic process	0.00072751	0.0040441	0.0019837	3.9722e-06
GO:0046496	nicotinamide nucleotide metabolic process		5.5932e-06
GO:0046668	regulation of retinal cell programmed cell death		1.1656e-07
GO:0046669	regulation of compound eye retinal cell programmed cell death		1.1656e-07
GO:0046670	positive regulation of retinal cell programmed cell death		1.9453e-06
GO:0046672	positive regulation of compound eye retinal cell programmed cell death		1.9453e-06
GO:0046835	carbohydrate phosphorylation	0.0048472
GO:0046942	carboxylic acid transport				0.0010353
GO:0048102	autophagic cell death			5.6902e-05
GO:0048232	male gamete generation		0.0057412
GO:0048468	cell development		0.0072712
GO:0048515	spermatid differentiation		0.0012595
GO:0048608	reproductive structure development		0.04237
GO:0048610	cellular process involved in reproduction		0.0035961
GO:0048666	neuron development		0.0081665
GO:0048667	cell morphogenesis involved in neuron differentiation		0.010742
GO:0048675	axon extension		0.023467
GO:0048699	generation of neurons		0.034901
GO:0048729	tissue morphogenesis		0.046471
GO:0048732	gland development		0.00046709
GO:0048754	branching morphogenesis of a tube		0.010021
GO:0048812	neuron projection morphogenesis		0.0090105
GO:0048814	regulation of dendrite morphogenesis		0.008895
GO:0048858	cell projection morphogenesis		0.04973
GO:0050768	negative regulation of neurogenesis		0.014829
GO:0050773	regulation of dendrite development		0.018758
GO:0050776	regulation of immune response				0.00010681
GO:0050795	regulation of behavior		0.0067843
GO:0050830	defense response to Gram-positive bacterium		7.8776e-07
GO:0050906	detection of stimulus involved in sensory perception				1.3823e-05
GO:0050953	sensory perception of light stimulus		0.030769
GO:0051093	negative regulation of developmental process		0.010951
GO:0051179	localization		0.0012719		0.00034605
GO:0051186	cofactor metabolic process		0.020638	0.047711	0.027474
GO:0051234	establishment of localization		0.0086596		0.00025229
GO:0051270	regulation of cellular component movement		0.0002602
GO:0051336	regulation of hydrolase activity		0.0016822
GO:0051346	negative regulation of hydrolase activity		2.9619e-12
GO:0051604	protein maturation		0.00031954
GO:0051606	detection of stimulus				3.6697e-06
GO:0051704	multi-organism process		0.00011625
GO:0051707	response to other organism		1.0095e-06		0.017122
GO:0052547	regulation of peptidase activity		6.0279e-10
GO:0052548	regulation of endopeptidase activity		1.7715e-11	0.026136
GO:0055085	transmembrane transport	5.7602e-09	4.7585e-05	2.2957e-08	0.00035297
GO:0055114	oxidation-reduction process	2.0326e-05	3.7247e-10	1.9362e-11	2.2666e-07
GO:0060284	regulation of cell development		0.017612
GO:0060429	epithelium development		0.044555
GO:0060446	branching involved in open tracheal system development		0.010021
GO:0060560	developmental growth involved in morphogenesis		0.023201
GO:0061138	morphogenesis of a branching epithelium		0.010021
GO:0070585	protein localization in mitochondrion	0.0072805
GO:0071436	sodium ion export		0.01726	0.0038376	2.8897e-05
GO:0071702	organic substance transport	0.01232	0.016445
GO:0072358	cardiovascular system development		0.013554
GO:0072359	circulatory system development		0.013554
GO:0072522	purine-containing compound biosynthetic process			0.024867
GO:0072524	pyridine-containing compound metabolic process		5.5932e-06
GO:0072655	establishment of protein localization in mitochondrion	0.0072805
GO:2000027	regulation of organ morphogenesis		0.0072712

## Sheet: Insects_GO_BP_summary_dupunder
#GO_id	GO_term	AgamDupBPunder	AmelDupBPunder	DmelDupBPunder	TcasDupBPunder
GO:0000003	reproduction			0.0003969
GO:0000226	microtubule cytoskeleton organization			0.018114
GO:0000278	mitotic cell cycle			0.011199
GO:0000375	RNA splicing, via transesterification reactions			0.00010723
GO:0000377	RNA splicing, via transesterification reactions with bulged adenosine as nucleophile			0.00015952
GO:0000398	nuclear mRNA splicing, via spliceosome			0.00015952
GO:0000902	cell morphogenesis			1.8326e-06	0.0019359
GO:0000904	cell morphogenesis involved in differentiation			0.00038751	0.0073887
GO:0001654	eye development			0.017517
GO:0001700	embryonic development via the syncytial blastoderm			0.028408
GO:0001745	compound eye morphogenesis			0.018523
GO:0001751	compound eye photoreceptor cell differentiation			0.0091706
GO:0001754	eye photoreceptor cell differentiation			0.013335
GO:0002009	morphogenesis of an epithelium			0.00016144
GO:0002165	instar larval or pupal development			1.3555e-05
GO:0003002	regionalization			2.8021e-06
GO:0003006	developmental process involved in reproduction			0.0012588
GO:0003008	system process			1.8495e-08
GO:0006139	nucleobase, nucleoside, nucleotide and nucleic acid metabolic process	0.0015693	4.9969e-06	8.3361e-11	1.3371e-08
GO:0006184	GTP catabolic process			0.019817
GO:0006259	DNA metabolic process			0.00017173
GO:0006351	transcription, DNA-dependent	0.0035381	0.0083832	0.024244	7.7183e-07
GO:0006355	regulation of transcription, DNA-dependent			0.00038751	1.6402e-09
GO:0006396	RNA processing	0.00086929		4.9917e-09	1.9287e-05
GO:0006397	mRNA processing	0.031865		3.0811e-06	0.00024171
GO:0006412	translation	0.0036402		0.00012458
GO:0006464	protein modification process	1.0218e-05			3.8149e-05
GO:0006468	protein phosphorylation			0.0059709	0.00036353
GO:0006793	phosphorus metabolic process	8.298e-05			0.015861
GO:0006796	phosphate metabolic process	8.298e-05			0.015861
GO:0006807	nitrogen compound metabolic process	0.011839	0.00030119	4.8213e-10	0.00033678
GO:0006928	cellular component movement			0.009283
GO:0006996	organelle organization			3.2785e-05	0.0096348
GO:0007010	cytoskeleton organization			1.7847e-05	0.0024922
GO:0007017	microtubule-based process				0.0056222
GO:0007049	cell cycle	0.025763		0.0052152	0.0023816
GO:0007154	cell communication			2.4678e-08
GO:0007163	establishment or maintenance of cell polarity			0.01907
GO:0007165	signal transduction			2.0717e-05
GO:0007167	enzyme linked receptor protein signaling pathway			0.035575
GO:0007267	cell-cell signaling			3.4164e-06
GO:0007268	synaptic transmission			8.8334e-06
GO:0007275	multicellular organismal development			5.7987e-12	0.012234
GO:0007276	gamete generation			4.8388e-05
GO:0007281	germ cell development			0.028202
GO:0007292	female gamete generation			5.5475e-09
GO:0007350	blastoderm segmentation			0.0027881
GO:0007389	pattern specification process			4.3771e-06	0.042287
GO:0007399	nervous system development			2.2222e-09	3.2058e-06
GO:0007409	axonogenesis			0.010625
GO:0007423	sensory organ development			0.009379
GO:0007424	open tracheal system development			0.0029226
GO:0007444	imaginal disc development			2.5225e-05	0.022631
GO:0007472	wing disc morphogenesis			0.00017173
GO:0007476	imaginal disc-derived wing morphogenesis			8.7058e-05
GO:0007552	metamorphosis			8.7058e-05
GO:0007560	imaginal disc morphogenesis			8.8334e-06
GO:0007610	behavior			0.0035578
GO:0008104	protein localization			0.0017984
GO:0008380	RNA splicing			0.00021635
GO:0009058	biosynthetic process	0.0077764	0.019613	2.6655e-05	0.00098737
GO:0009059	macromolecule biosynthetic process	1.1832e-10	3.7492e-07	7.7603e-07	9.1357e-12
GO:0009605	response to external stimulus			0.023237
GO:0009653	anatomical structure morphogenesis			3.8351e-13	0.002178
GO:0009790	embryo development			0.00010139
GO:0009791	post-embryonic development			2.6692e-05
GO:0009792	embryo development ending in birth or egg hatching			0.020902
GO:0009798	axis specification			0.0002454
GO:0009880	embryonic pattern specification			0.0012133
GO:0009886	post-embryonic morphogenesis			0.00013179
GO:0009887	organ morphogenesis			9.4335e-08	9.5168e-06
GO:0009888	tissue development			0.0040129
GO:0009889	regulation of biosynthetic process			0.00013245	3.2058e-06
GO:0009892	negative regulation of metabolic process				0.045078
GO:0009966	regulation of signal transduction			4.8134e-05	3.0322e-05
GO:0009987	cellular process	3.4844e-12		3.0811e-06	1.7529e-08
GO:0010033	response to organic substance			0.0035785
GO:0010467	gene expression	4.4843e-08	3.7492e-07	9.8367e-14	2.5778e-18
GO:0010468	regulation of gene expression		0.021982	7.8955e-07	6.9663e-10
GO:0010556	regulation of macromolecule biosynthetic process			0.00010594	3.6702e-08
GO:0010605	negative regulation of macromolecule metabolic process				0.0092637
GO:0010629	negative regulation of gene expression				0.031017
GO:0010646	regulation of cell communication				0.01496
GO:0010941	regulation of cell death			0.013335
GO:0015031	protein transport	0.034945			0.016287
GO:0016043	cellular component organization			5.4476e-13	1.4653e-08
GO:0016070	RNA metabolic process	1.4043e-07	1.0421e-05	2.7456e-11	1.0121e-13
GO:0016071	mRNA metabolic process	0.046563		1.1196e-06	0.0070161
GO:0016192	vesicle-mediated transport			0.017604	0.029973
GO:0016310	phosphorylation	0.00028107
GO:0016358	dendrite development			0.011793
GO:0016477	cell migration			0.013294
GO:0019219	regulation of nucleobase, nucleoside, nucleotide and nucleic acid metabolic process			3.4025e-06	1.0142e-11
GO:0019222	regulation of metabolic process		0.0083832	4.9917e-09	6.4266e-11
GO:0019226	transmission of nerve impulse			3.4025e-06
GO:0019538	protein metabolic process				0.0043982
GO:0019953	sexual reproduction			2.2953e-05
GO:0022008	neurogenesis			5.6579e-08	0.000313
GO:0022402	cell cycle process			0.009379	0.044036
GO:0022403	cell cycle phase			0.014568
GO:0022414	reproductive process			6.7839e-05
GO:0022603	regulation of anatomical structure morphogenesis			0.038567
GO:0022604	regulation of cell morphogenesis			0.013455
GO:0022607	cellular component assembly			6.5719e-08
GO:0023051	regulation of signaling			1.3402e-05	3.8149e-05
GO:0023052	signaling	0.037977		3.1232e-09
GO:0030029	actin filament-based process			0.00028247
GO:0030030	cell projection organization			1.1196e-06	0.00096832
GO:0030036	actin cytoskeleton organization			0.00032816
GO:0030154	cell differentiation			2.5475e-11	0.00017492
GO:0030182	neuron differentiation			1.1196e-06	0.00096832
GO:0030707	ovarian follicle cell development			2.6655e-05
GO:0031175	neuron projection development			0.00050253	0.0085579
GO:0031323	regulation of cellular metabolic process			5.2685e-08	1.6483e-09
GO:0031324	negative regulation of cellular metabolic process				0.03678
GO:0031326	regulation of cellular biosynthetic process			0.00014228	3.3863e-06
GO:0032259	methylation			0.037311
GO:0032268	regulation of cellular protein metabolic process			0.031215
GO:0032501	multicellular organismal process			4.5954e-16
GO:0032502	developmental process			6.2158e-13	0.001087
GO:0032504	multicellular organism reproduction			0.00010594
GO:0032774	RNA biosynthetic process	0.0035381	0.0083832	0.024244	7.7183e-07
GO:0032879	regulation of localization			0.01903
GO:0032940	secretion by cell			0.00050661
GO:0032989	cellular component morphogenesis			8.6522e-08	0.0020969
GO:0032990	cell part morphogenesis			1.8073e-05	0.0033737
GO:0033036	macromolecule localization			0.00087382	0.024732
GO:0033554	cellular response to stress			0.020902	0.015116
GO:0034641	cellular nitrogen compound metabolic process	0.0015693	5.9523e-05	1.6945e-10	8.2862e-06
GO:0034645	cellular macromolecule biosynthetic process	1.7068e-10	3.7492e-07	1.2693e-06	3.2842e-12
GO:0035107	appendage morphogenesis			0.00098153
GO:0035114	imaginal disc-derived appendage morphogenesis			0.00044136
GO:0035120	post-embryonic appendage morphogenesis			0.00021911
GO:0035220	wing disc development			5.0884e-05	0.031335
GO:0035282	segmentation			0.00021635
GO:0035556	intracellular signal transduction			0.00013427	0.034152
GO:0035637	multicellular organismal signaling			3.4025e-06
GO:0040008	regulation of growth			0.00037358
GO:0040011	locomotion			0.00067383
GO:0042221	response to chemical stimulus			0.010184
GO:0042330	taxis			0.047835
GO:0043067	regulation of programmed cell death			0.020664
GO:0043170	macromolecule metabolic process	1.1685e-09	3.7492e-07	1.292e-05	1.9697e-11
GO:0043412	macromolecule modification	5.5968e-06			2.8865e-05
GO:0044085	cellular component biogenesis			3.1232e-09	0.045078
GO:0044093	positive regulation of molecular function			0.028408
GO:0044237	cellular metabolic process	1.1417e-13		0.037262	6.3808e-05
GO:0044238	primary metabolic process	0.022834
GO:0044249	cellular biosynthetic process	0.0015693	0.021982	2.5225e-05	0.00053601
GO:0044260	cellular macromolecule metabolic process	1.968e-22	2.6433e-10	1.0676e-12	5.5781e-26
GO:0044267	cellular protein metabolic process	4.1e-09	0.0099606		1.1715e-11
GO:0045165	cell fate commitment			0.0014919
GO:0045184	establishment of protein localization	0.025763			0.037074
GO:0045595	regulation of cell differentiation			0.0034153
GO:0046039	GTP metabolic process			0.014697
GO:0046530	photoreceptor cell differentiation			0.0061091
GO:0046903	secretion			0.00021635
GO:0048468	cell development			5.5281e-10	0.0040597
GO:0048477	oogenesis			3.35e-09
GO:0048513	organ development			4.0408e-06	0.034496
GO:0048518	positive regulation of biological process			0.00016144
GO:0048519	negative regulation of biological process			4.2563e-05	4.5372e-06
GO:0048522	positive regulation of cellular process			0.00068514
GO:0048523	negative regulation of cellular process			7.5561e-05	2.0475e-06
GO:0048563	post-embryonic organ morphogenesis			8.8334e-06
GO:0048569	post-embryonic organ development			3.8435e-05	0.022631
GO:0048583	regulation of response to stimulus			2.2953e-05	1.8565e-05
GO:0048592	eye morphogenesis			0.019356
GO:0048598	embryonic morphogenesis			0.011136
GO:0048609	multicellular organismal reproductive process			1.2968e-05
GO:0048610	cellular process involved in reproduction			1.7277e-05
GO:0048646	anatomical structure formation involved in morphogenesis			0.0002594
GO:0048666	neuron development			2.7192e-05	0.0030385
GO:0048667	cell morphogenesis involved in neuron differentiation			0.00068345	0.022449
GO:0048699	generation of neurons			3.0082e-07	0.00036634
GO:0048707	instar larval or pupal morphogenesis			0.00026305
GO:0048729	tissue morphogenesis			0.0011383
GO:0048731	system development			1.1552e-12	0.0031814
GO:0048736	appendage development			0.0013921
GO:0048737	imaginal disc-derived appendage development			0.00067165
GO:0048749	compound eye development			0.019817
GO:0048812	neuron projection morphogenesis			0.00055857	0.0091815
GO:0048813	dendrite morphogenesis			0.011793
GO:0048856	anatomical structure development			7.2385e-15	0.00058504
GO:0048858	cell projection morphogenesis			2.0378e-05	0.0036165
GO:0048869	cellular developmental process			3.0527e-13	3.9315e-05
GO:0048870	cell motility			0.022452
GO:0050789	regulation of biological process	0.040344		2.3647e-15	4.0809e-13
GO:0050790	regulation of catalytic activity			0.030959
GO:0050793	regulation of developmental process			0.00022723
GO:0050794	regulation of cellular process	0.0031691		7.2385e-15	2.14e-13
GO:0050877	neurological system process			1.1865e-08
GO:0050896	response to stimulus			3.0082e-07
GO:0051128	regulation of cellular component organization			2.184e-05
GO:0051171	regulation of nitrogen compound metabolic process			2.7933e-06	9.1357e-12
GO:0051239	regulation of multicellular organismal process			0.0036363
GO:0051246	regulation of protein metabolic process			0.0092731
GO:0051252	regulation of RNA metabolic process			9.4143e-05	2.8187e-10
GO:0051301	cell division			0.013294
GO:0051641	cellular localization			0.0018283	3.8149e-05
GO:0051649	establishment of localization in cell			0.016521	2.5063e-07
GO:0051674	localization of cell			0.047145
GO:0051716	cellular response to stimulus			1.2751e-06	0.0064676
GO:0051726	regulation of cell cycle			0.004248
GO:0051960	regulation of nervous system development			0.039507
GO:0060255	regulation of macromolecule metabolic process		0.019674	5.8052e-08	1.5954e-10
GO:0060429	epithelium development			0.00021635
GO:0060541	respiratory system development			0.002277
GO:0061061	muscle structure development			0.015809	0.0059533
GO:0065007	biological regulation			5.8937e-19	1.9697e-11
GO:0065008	regulation of biological quality			0.00013245
GO:0065009	regulation of molecular function			0.020902
GO:0070727	cellular macromolecule localization				0.042889
GO:0070887	cellular response to chemical stimulus			0.025813
GO:0071840	cellular component organization or biogenesis			4.2789e-14	6.406e-10
GO:0071841	cellular component organization or biogenesis at cellular level			7.2385e-15	5.8011e-08
GO:0071842	cellular component organization at cellular level			9.8367e-14	3.9635e-07
GO:0071844	cellular component assembly at cellular level			1.9976e-07
GO:0080090	regulation of primary metabolic process		0.019613	8.4906e-09	6.931e-10
GO:0090066	regulation of anatomical structure size			0.012875
GO:0090304	nucleic acid metabolic process	3.6415e-08	3.7492e-07	2.3647e-15	8.214e-14
GO:2000026	regulation of multicellular organismal development			0.025776
GO:2000112	regulation of cellular macromolecule biosynthetic process			0.00010594	3.6702e-08

## Sheet: Diptera_GO_BP_summary_dupover
#GO_id	GO_term	DmelDupBPover	BrachyceranDupBPover	Brachyceran2DmeldupBPover	PreBrachyceranDupBPover	PreBrachyceran2DmelDupBPover
GO:0005975	carbohydrate metabolic process	2.4197e-05	0.0003078
GO:0005996	monosaccharide metabolic process	1.1932e-05	1.6803e-05
GO:0006006	glucose metabolic process	0.00027946	0.00369
GO:0006007	glucose catabolic process	0.00072751	0.013419
GO:0006066	alcohol metabolic process	0.00023038	5.1112e-05
GO:0006071	glycerol metabolic process	0.01232	0.0035089
GO:0006091	generation of precursor metabolites and energy	0.0022247	0.0032223
GO:0006096	glycolysis	2.0326e-05	0.0020764
GO:0006164	purine nucleotide biosynthetic process	0.03223	0.017566
GO:0006351	transcription, DNA-dependent					0.017232
GO:0006355	regulation of transcription, DNA-dependent					0.0067965
GO:0006508	proteolysis	6.6874e-06	0.0011678
GO:0006511	ubiquitin-dependent protein catabolic process					0.014191
GO:0006626	protein targeting to mitochondrion	0.0072805	0.0047289
GO:0006793	phosphorus metabolic process		0.024221
GO:0006796	phosphate metabolic process		0.024221
GO:0006810	transport		0.025462
GO:0006811	ion transport	0.00072751	6.0495e-05
GO:0006812	cation transport		0.00369
GO:0006818	hydrogen transport	4.7495e-07	1.1472e-09
GO:0006820	anion transport	0.00089136	0.037603
GO:0006835	dicarboxylic acid transport	0.00086884
GO:0006839	mitochondrial transport	7.1441e-05	1.4948e-05
GO:0008152	metabolic process	0.00016285	0.00095067
GO:0009889	regulation of biosynthetic process					0.0032177
GO:0010467	gene expression					0.018568
GO:0010468	regulation of gene expression					0.0027599
GO:0010556	regulation of macromolecule biosynthetic process					0.0047215
GO:0015672	monovalent inorganic cation transport	0.00088227	3.7268e-05
GO:0015711	organic anion transport	0.0032008
GO:0015849	organic acid transport	0.024245
GO:0015985	energy coupled proton transport, down electrochemical gradient	0.0072445	0.0017462
GO:0015986	ATP synthesis coupled proton transport	0.0072445	0.0017462
GO:0015988	energy coupled proton transport, against electrochemical gradient	1.9484e-05	1.5428e-06
GO:0015991	ATP hydrolysis coupled proton transport	1.9484e-05	1.5428e-06
GO:0015992	proton transport	4.7495e-07	1.1472e-09
GO:0016052	carbohydrate catabolic process	4.3631e-05	0.00021651
GO:0016070	RNA metabolic process					0.014191
GO:0016311	dephosphorylation	9.3173e-05	3.7268e-05
GO:0019219	regulation of nucleobase, nucleoside, nucleotide and nucleic acid metabolic process					0.0027599
GO:0019222	regulation of metabolic process					0.0027599
GO:0019318	hexose metabolic process	6.6874e-06	1.6803e-05
GO:0019320	hexose catabolic process	0.00072751	0.013419
GO:0019400	alditol metabolic process	0.01232	0.0035089
GO:0019751	polyol metabolic process		0.039717
GO:0019941	modification-dependent protein catabolic process					0.014191
GO:0031323	regulation of cellular metabolic process					0.0027599
GO:0031326	regulation of cellular biosynthetic process					0.0032177
GO:0032501	multicellular organismal process					0.033602
GO:0032774	RNA biosynthetic process					0.017232
GO:0034220	ion transmembrane transport	0.010492	0.0010919
GO:0043632	modification-dependent macromolecule catabolic process					0.018568
GO:0043648	dicarboxylic acid metabolic process	0.00085835	0.0017776
GO:0044262	cellular carbohydrate metabolic process	4.7495e-07	1.9486e-06
GO:0044275	cellular carbohydrate catabolic process	0.00088227	0.011162
GO:0045454	cell redox homeostasis	0.0022247	0.0020764
GO:0046164	alcohol catabolic process	0.00070566	0.0082621
GO:0046365	monosaccharide catabolic process	0.00072751	0.013419
GO:0046835	carbohydrate phosphorylation	0.0048472	0.0064551
GO:0050789	regulation of biological process					0.0067965
GO:0050794	regulation of cellular process					0.011717
GO:0051171	regulation of nitrogen compound metabolic process					0.0027599
GO:0051234	establishment of localization		0.037603
GO:0051252	regulation of RNA metabolic process					0.0032177
GO:0055085	transmembrane transport	5.7602e-09	9.1772e-11
GO:0055114	oxidation-reduction process	2.0326e-05	2.1959e-06
GO:0060255	regulation of macromolecule metabolic process					0.0047215
GO:0065007	biological regulation					0.017232
GO:0070585	protein localization in mitochondrion	0.0072805	0.0047289
GO:0071702	organic substance transport	0.01232	0.024832
GO:0072522	purine-containing compound biosynthetic process		0.036005
GO:0072655	establishment of protein localization in mitochondrion	0.0072805	0.0047289
GO:0080090	regulation of primary metabolic process					0.0027599
GO:0090304	nucleic acid metabolic process					0.018568
GO:2000112	regulation of cellular macromolecule biosynthetic process					0.0047215

## Sheet: Diptera_GO_BP_summary_dupunder
#GO_id	GO_term	DmelDupBPunder	BrachyceranDupBPunder	Brachyceran2DmelDupBPunder	PreBrachyceranDupBPunder	PreBrachyceran2DmelDupBPunder
GO:0000003	reproduction	0.0003969	2.309e-05
GO:0000226	microtubule cytoskeleton organization	0.018114	0.013821
GO:0000278	mitotic cell cycle	0.011199	0.011897
GO:0000375	RNA splicing, via transesterification reactions	0.00010723	0.0001818
GO:0000377	RNA splicing, via transesterification reactions with bulged adenosine as nucleophile	0.00015952	0.00026131
GO:0000398	nuclear mRNA splicing, via spliceosome	0.00015952	0.00026131
GO:0000902	cell morphogenesis	1.8326e-06	1.8587e-07
GO:0000904	cell morphogenesis involved in differentiation	0.00038751	3.3326e-05
GO:0001654	eye development	0.017517	0.03959
GO:0001700	embryonic development via the syncytial blastoderm	0.028408
GO:0001745	compound eye morphogenesis	0.018523	0.029918
GO:0001751	compound eye photoreceptor cell differentiation	0.0091706
GO:0001754	eye photoreceptor cell differentiation	0.013335
GO:0002009	morphogenesis of an epithelium	0.00016144	0.00037701
GO:0002165	instar larval or pupal development	1.3555e-05	0.00020433
GO:0003002	regionalization	2.8021e-06	3.9001e-07
GO:0003006	developmental process involved in reproduction	0.0012588	0.00026804
GO:0003008	system process	1.8495e-08	2.616e-08
GO:0006139	nucleobase, nucleoside, nucleotide and nucleic acid metabolic process	8.3361e-11	1.2514e-09
GO:0006184	GTP catabolic process	0.019817
GO:0006259	DNA metabolic process	0.00017173	0.00076515
GO:0006351	transcription, DNA-dependent	0.024244	0.00051229
GO:0006355	regulation of transcription, DNA-dependent	0.00038751	1.6783e-06	0.025775
GO:0006396	RNA processing	4.9917e-09	2.6938e-07
GO:0006397	mRNA processing	3.0811e-06	1.4605e-05
GO:0006412	translation	0.00012458	0.00049237
GO:0006468	protein phosphorylation	0.0059709	0.013821
GO:0006807	nitrogen compound metabolic process	4.8213e-10	4.345e-09
GO:0006928	cellular component movement	0.009283	0.0066049
GO:0006935	chemotaxis		0.033934
GO:0006996	organelle organization	3.2785e-05	1.6877e-05
GO:0007010	cytoskeleton organization	1.7847e-05	2.4515e-05
GO:0007049	cell cycle	0.0052152	0.0085613
GO:0007154	cell communication	2.4678e-08	8.7242e-09
GO:0007163	establishment or maintenance of cell polarity	0.01907
GO:0007165	signal transduction	2.0717e-05	3.7913e-05
GO:0007167	enzyme linked receptor protein signaling pathway	0.035575	0.035821
GO:0007267	cell-cell signaling	3.4164e-06	1.3875e-06
GO:0007268	synaptic transmission	8.8334e-06	1.5628e-05
GO:0007275	multicellular organismal development	5.7987e-12	7.56e-13
GO:0007276	gamete generation	4.8388e-05	0.00012509
GO:0007281	germ cell development	0.028202	0.044812
GO:0007292	female gamete generation	5.5475e-09	1.4195e-07
GO:0007350	blastoderm segmentation	0.0027881
GO:0007389	pattern specification process	4.3771e-06	7.4301e-07
GO:0007399	nervous system development	2.2222e-09	1.0427e-10
GO:0007409	axonogenesis	0.010625	0.0037633
GO:0007411	axon guidance		0.030741
GO:0007423	sensory organ development	0.009379	0.0060021
GO:0007424	open tracheal system development	0.0029226	0.00072162
GO:0007444	imaginal disc development	2.5225e-05	0.00040716
GO:0007472	wing disc morphogenesis	0.00017173	0.00055479
GO:0007476	imaginal disc-derived wing morphogenesis	8.7058e-05	0.00026587
GO:0007552	metamorphosis	8.7058e-05	0.00051229
GO:0007560	imaginal disc morphogenesis	8.8334e-06	3.8025e-05
GO:0007610	behavior	0.0035578	0.0021255
GO:0008104	protein localization	0.0017984	0.026129
GO:0008380	RNA splicing	0.00021635	0.00050433
GO:0009058	biosynthetic process	2.6655e-05	8.976e-06
GO:0009059	macromolecule biosynthetic process	7.7603e-07	8.4545e-08
GO:0009605	response to external stimulus	0.023237	0.0077836
GO:0009653	anatomical structure morphogenesis	3.8351e-13	1.1587e-13
GO:0009790	embryo development	0.00010139	5.3482e-05
GO:0009791	post-embryonic development	2.6692e-05	0.00051229
GO:0009792	embryo development ending in birth or egg hatching	0.020902
GO:0009798	axis specification	0.0002454
GO:0009880	embryonic pattern specification	0.0012133
GO:0009886	post-embryonic morphogenesis	0.00013179	0.00065133
GO:0009887	organ morphogenesis	9.4335e-08	8.9516e-08
GO:0009888	tissue development	0.0040129	0.0056746
GO:0009889	regulation of biosynthetic process	0.00013245	2.4383e-07	0.015191
GO:0009890	negative regulation of biosynthetic process		0.026517
GO:0009892	negative regulation of metabolic process		0.034466
GO:0009966	regulation of signal transduction	4.8134e-05	4.9299e-05
GO:0009987	cellular process	3.0811e-06	1.0332e-05
GO:0010033	response to organic substance	0.0035785	0.029977
GO:0010467	gene expression	9.8367e-14	2.0438e-15
GO:0010468	regulation of gene expression	7.8955e-07	2.7879e-10	0.015056
GO:0010556	regulation of macromolecule biosynthetic process	0.00010594	2.6022e-07	0.01976
GO:0010558	negative regulation of macromolecule biosynthetic process		0.035374
GO:0010605	negative regulation of macromolecule metabolic process		0.022476
GO:0010629	negative regulation of gene expression		0.035374
GO:0010646	regulation of cell communication		0.041109
GO:0010941	regulation of cell death	0.013335
GO:0016043	cellular component organization	5.4476e-13	1.2726e-12
GO:0016070	RNA metabolic process	2.7456e-11	1.7899e-13
GO:0016071	mRNA metabolic process	1.1196e-06	3.0275e-06
GO:0016192	vesicle-mediated transport	0.017604
GO:0016358	dendrite development	0.011793
GO:0016477	cell migration	0.013294	0.0060041
GO:0019219	regulation of nucleobase, nucleoside, nucleotide and nucleic acid metabolic process	3.4025e-06	2.6446e-09	0.015093
GO:0019222	regulation of metabolic process	4.9917e-09	2.9325e-12	0.015191
GO:0019226	transmission of nerve impulse	3.4025e-06	6.9143e-06
GO:0019953	sexual reproduction	2.2953e-05	5.9748e-05
GO:0022008	neurogenesis	5.6579e-08	7.7544e-09
GO:0022402	cell cycle process	0.009379	0.016753
GO:0022403	cell cycle phase	0.014568	0.032
GO:0022414	reproductive process	6.7839e-05	1.0238e-05
GO:0022603	regulation of anatomical structure morphogenesis	0.038567
GO:0022604	regulation of cell morphogenesis	0.013455	0.046449
GO:0022607	cellular component assembly	6.5719e-08	1.1238e-06
GO:0023051	regulation of signaling	1.3402e-05	2.7648e-05
GO:0023052	signaling	3.1232e-09	9.2695e-09
GO:0030029	actin filament-based process	0.00028247	0.0016972
GO:0030030	cell projection organization	1.1196e-06	1.2071e-07
GO:0030036	actin cytoskeleton organization	0.00032816	0.0019295
GO:0030154	cell differentiation	2.5475e-11	7.6376e-12
GO:0030182	neuron differentiation	1.1196e-06	8.4545e-08
GO:0030707	ovarian follicle cell development	2.6655e-05
GO:0031175	neuron projection development	0.00050253	2.425e-05
GO:0031323	regulation of cellular metabolic process	5.2685e-08	2.057e-11	0.015056
GO:0031324	negative regulation of cellular metabolic process		0.048003
GO:0031326	regulation of cellular biosynthetic process	0.00014228	2.6022e-07	0.015191
GO:0031327	negative regulation of cellular biosynthetic process		0.026517
GO:0032259	methylation	0.037311
GO:0032268	regulation of cellular protein metabolic process	0.031215	0.046449
GO:0032501	multicellular organismal process	4.5954e-16	1.0499e-17
GO:0032502	developmental process	6.2158e-13	6.0591e-14
GO:0032504	multicellular organism reproduction	0.00010594	3.8025e-05
GO:0032774	RNA biosynthetic process	0.024244	0.00051229
GO:0032879	regulation of localization	0.01903	0.037672
GO:0032940	secretion by cell	0.00050661	0.014908
GO:0032989	cellular component morphogenesis	8.6522e-08	2.4052e-09
GO:0032990	cell part morphogenesis	1.8073e-05	7.4301e-07
GO:0033036	macromolecule localization	0.00087382	0.029618
GO:0033554	cellular response to stress	0.020902
GO:0034641	cellular nitrogen compound metabolic process	1.6945e-10	4.9241e-10
GO:0034645	cellular macromolecule biosynthetic process	1.2693e-06	1.2975e-07
GO:0035107	appendage morphogenesis	0.00098153	0.0011891
GO:0035114	imaginal disc-derived appendage morphogenesis	0.00044136	0.00046765
GO:0035120	post-embryonic appendage morphogenesis	0.00021911	0.00041803
GO:0035220	wing disc development	5.0884e-05	0.00038239
GO:0035282	segmentation	0.00021635
GO:0035556	intracellular signal transduction	0.00013427	0.003555
GO:0035637	multicellular organismal signaling	3.4025e-06	6.9143e-06
GO:0040008	regulation of growth	0.00037358
GO:0040011	locomotion	0.00067383	0.00010382
GO:0042221	response to chemical stimulus	0.010184	0.026908
GO:0042330	taxis	0.047835	0.01184
GO:0043067	regulation of programmed cell death	0.020664
GO:0043170	macromolecule metabolic process	1.292e-05	2.4515e-05
GO:0044085	cellular component biogenesis	3.1232e-09	8.4545e-08
GO:0044093	positive regulation of molecular function	0.028408
GO:0044237	cellular metabolic process	0.037262	0.022476
GO:0044249	cellular biosynthetic process	2.5225e-05	9.5785e-06
GO:0044260	cellular macromolecule metabolic process	1.0676e-12	1.523e-12
GO:0045165	cell fate commitment	0.0014919	0.0012637
GO:0045595	regulation of cell differentiation	0.0034153	0.0016574
GO:0045892	negative regulation of transcription, DNA-dependent		0.049292
GO:0045934	negative regulation of nucleobase, nucleoside, nucleotide and nucleic acid metabolic process		0.034704
GO:0046039	GTP metabolic process	0.014697	0.044633
GO:0046530	photoreceptor cell differentiation	0.0061091	0.020987
GO:0046903	secretion	0.00021635	0.0078397
GO:0048468	cell development	5.5281e-10	1.486e-10
GO:0048477	oogenesis	3.35e-09	8.4545e-08
GO:0048513	organ development	4.0408e-06	1.9265e-06
GO:0048518	positive regulation of biological process	0.00016144	0.00030822
GO:0048519	negative regulation of biological process	4.2563e-05	6.5222e-06
GO:0048522	positive regulation of cellular process	0.00068514	0.00073922
GO:0048523	negative regulation of cellular process	7.5561e-05	3.304e-06
GO:0048563	post-embryonic organ morphogenesis	8.8334e-06	3.8025e-05
GO:0048569	post-embryonic organ development	3.8435e-05	0.00026804
GO:0048583	regulation of response to stimulus	2.2953e-05	1.0369e-05
GO:0048592	eye morphogenesis	0.019356	0.036013
GO:0048598	embryonic morphogenesis	0.011136	0.024699
GO:0048609	multicellular organismal reproductive process	1.2968e-05	1.6877e-05
GO:0048610	cellular process involved in reproduction	1.7277e-05	5.8112e-05
GO:0048646	anatomical structure formation involved in morphogenesis	0.0002594	0.0007871
GO:0048666	neuron development	2.7192e-05	2.1549e-06
GO:0048667	cell morphogenesis involved in neuron differentiation	0.00068345	3.8025e-05
GO:0048699	generation of neurons	3.0082e-07	3.0534e-08
GO:0048707	instar larval or pupal morphogenesis	0.00026305	0.0011891
GO:0048729	tissue morphogenesis	0.0011383	0.0020606
GO:0048731	system development	1.1552e-12	6.0694e-13
GO:0048736	appendage development	0.0013921	0.00088279
GO:0048737	imaginal disc-derived appendage development	0.00067165	0.00033845
GO:0048749	compound eye development	0.019817	0.037738
GO:0048812	neuron projection morphogenesis	0.00055857	2.6453e-05
GO:0048813	dendrite morphogenesis	0.011793
GO:0048856	anatomical structure development	7.2385e-15	1.8647e-15
GO:0048858	cell projection morphogenesis	2.0378e-05	8.2723e-07
GO:0048869	cellular developmental process	3.0527e-13	1.6298e-13
GO:0048870	cell motility	0.022452	0.014908
GO:0050789	regulation of biological process	2.3647e-15	2.0245e-17
GO:0050790	regulation of catalytic activity	0.030959
GO:0050793	regulation of developmental process	0.00022723	0.00087766
GO:0050794	regulation of cellular process	7.2385e-15	9.9747e-17
GO:0050877	neurological system process	1.1865e-08	8.0247e-09
GO:0050896	response to stimulus	3.0082e-07	8.7708e-08
GO:0051128	regulation of cellular component organization	2.184e-05	2.0759e-05
GO:0051171	regulation of nitrogen compound metabolic process	2.7933e-06	2.0408e-09	0.015093
GO:0051172	negative regulation of nitrogen compound metabolic process		0.034704
GO:0051239	regulation of multicellular organismal process	0.0036363	0.011814
GO:0051246	regulation of protein metabolic process	0.0092731	0.018134
GO:0051252	regulation of RNA metabolic process	9.4143e-05	1.4195e-07	0.015191
GO:0051301	cell division	0.013294	0.0015665
GO:0051641	cellular localization	0.0018283	0.021564
GO:0051649	establishment of localization in cell	0.016521
GO:0051674	localization of cell	0.047145	0.035374
GO:0051716	cellular response to stimulus	1.2751e-06	3.9737e-06
GO:0051726	regulation of cell cycle	0.004248	0.0020413
GO:0051960	regulation of nervous system development	0.039507	0.030856
GO:0060255	regulation of macromolecule metabolic process	5.8052e-08	9.2242e-11	0.01976
GO:0060429	epithelium development	0.00021635	0.0005444
GO:0060541	respiratory system development	0.002277	0.00055829
GO:0061061	muscle structure development	0.015809	0.01184
GO:0065007	biological regulation	5.8937e-19	4.4554e-20
GO:0065008	regulation of biological quality	0.00013245	0.0024945
GO:0065009	regulation of molecular function	0.020902	0.035374
GO:0070887	cellular response to chemical stimulus	0.025813
GO:0071840	cellular component organization or biogenesis	4.2789e-14	1.7899e-13
GO:0071841	cellular component organization or biogenesis at cellular level	7.2385e-15	4.9666e-15
GO:0071842	cellular component organization at cellular level	9.8367e-14	3.3246e-14
GO:0071844	cellular component assembly at cellular level	1.9976e-07	2.7027e-06
GO:0080090	regulation of primary metabolic process	8.4906e-09	2.6595e-12	0.015056
GO:0090066	regulation of anatomical structure size	0.012875
GO:0090304	nucleic acid metabolic process	2.3647e-15	4.4479e-17
GO:2000026	regulation of multicellular organismal development	0.025776	0.035374
GO:2000112	regulation of cellular macromolecule biosynthetic process	0.00010594	2.6022e-07	0.01976
GO:2000113	negative regulation of cellular macromolecule biosynthetic process		0.035374
