# Supplementary material for: Genomic signatures of globally enhanced gene duplicate accumulation in the megadiverse higher Diptera fueling intralocus sexual conflict resolution
Source: PeerJ. 2020 Oct 12;8:e10012. doi: 10.7717/peerj.10012 (PMC7560327; doi:10.7717/peerj.10012)
Supplement: Supplemental Information 6 — Orange cells contain paralogs produced by parallel gene duplication events. Bold font in orange cells indicates asymmetrically diverged paralog pairs. [file peerj-08-10012-s006.xlsx]

## Sheet: Homolog conservation
	Gene family	Gene name	Drosophila CG#	Master list ID	D. virilis	M. domestica	G. morsitans	D. antiqua	C. capitata	T. dalmanni	P. coquilletti	M. destructor	S. mosellana	C. nasturtii	L. longipalpis	P. papatasi	A. aegypti	C. quinquefasciatus	A. gambiae	T. castaneum	A. mellifera	Duplications predate
GO:0045454 cell redox homeostasis	Glutaredoxin	Grx1t	CG7975	933.1	XP_002049720	MDOA002306	GMOY002543 GMOY011241	Unigene1609	XP_004519116	comp160147	MNCL01000001.1	AEGA01023598	VUAH01006165	VYII01000127 VYII01002135	-	PPATMP010765	AAEL013980	-	AGAP011107	XP EFA08711 XP 975253	XP 001123018	Drosophilidae
		Grx1	CG6852	933.2	XP_002047597*
GO:0045454 cell redox homeostasis	Thioredoxin reductase	Trxr-1	CG2151	206.1	XP_002056889	MDOA001306	GMOY004864 GMOY003575	CL2228	comp59608	comp162833	MNCL01000081.1	JXPD01005603	VUAH01000003	VYII01001024	-	-	AAEL002886	-	AGAP000565RA	XP 008191172 XP 969619	NP 001171496	Drosophilidae
		Trxr-2	CG11401	206.2	XP_002047939
GO:0045454 cell redox homeostasis	Thioredoxin	Trx-2	CG31884	156.3	XP_002057775	MDOA007400	GMOY006832	Unigene 1698	comp61885	comp144014	MNCL01000044.1	AEGA01013763	VUAH01000001_1 VUAH01000001_1_6 VUAH01000001_2_3 VUAH01000001_5 VUAH01000001_7_8	XP_031625960 XP_XP 031625959	LLOTMP005819	PPATMP003111	AAEL010777	-	AGAP009584	XP 967987	XP 003250408	Schizophora Schizophora Schizophora
		Trx-1 (dhd)	CG4193	156.2	XP_002057023 XP_002057025	MDOA000488	-	Unigene 1023	Contig5575	comp166262 comp151557 comp146431
		TrxT/1	CG3315	156.1	XP_002057022	MDOA014337	scaffoldGmorY1scf7180000649373:1:42326:1	-	comp62603	comp151633 comp155821 2
		CG13473	CG13473	156.5	XP 002047895	AQPM01000161 MDOA004695	Y1scf7180000649373 1		Contig5575 2	comp155821 1
								Unigene22236		comp4265346
		Txl	CG5495	156.4	independent conserved subfamily
GO:0006839 mitochondrial transport GO:0006626 GO:0070585 GO:0072655	Heat Shock Protein 60	Hsp60	CG12101	302.1	XP_002058167	MDOA007155PA	GMOY002421 GMOY006640	Unigene 1143	XP_004529412	comp124036 comp147828 comp155730 comp159314	MNCL01000081.1	gbAEGA01018086	VUAH01000001	XP_31621812	-	PPATMP003142PA	AGAP004002	CPIJ008889	AGAP004002	XP 971630	XP 392899.2	Drosophilidae Drosophilidae Drosophilidae
		Hsp60B	CG2830	302.4	XP_002052822
		Hsp60C	CG7235	302.2	XP_002051422
		Hsp60D	CG16954	302.3	D. willistoni XP 002065107
GO:0006839 mitochondrial transport GO:0006626 GO:0070585 GO:0072655	Mitochondrial inner membrane translocases	Tim13	CG11611	1052.1	XP_002048624 XP_002059026	MDOA011431	GMOY011701 GMOY006103	Unigene1831	XP_004535304 XP_004523520	comp157648	MNCL01000148.1 MNCL01000193.1	AEGA01014751	VUAH01000001	XP_31635707	-	-	AAEL008128	-	AGAP002277	XP 008199565	XP 001121522	Drosophilidae melanogaster subgroup
		CG34132	CG34132	1052.2	XP_002051868
		CG42302	CG42302	1052.3
					XP_002055451
GO:0006839 mitochondrial transport GO:0006626 GO:0070585 GO:0072655	Mitochondrial inner membrane translocases	Tim17b1	CG1158		XP_002056569 XP_002056572	MDOA012163	GMOY012330	Unigene1466	XP_004526337	comp142682	MNCL01000012.1	AEGA01006707	VUAH01000010.1	XP_31623587 VYII01000687	-	-	AGAP004657	-	AGAP004657	XP 971201	XP 001120807 XP 003249498	Drosophilidae Drosophilidae melanogaster subgroup
		Tim17b2	CG15257		XP_002052164
		CG1724	CG1724
		Tim17b	CG40451		XP_002058764
GO:0006839 mitochondrial transport GO:0006626 GO:0070585 GO:0072655	P-P-bond-hydrolysis-driven protein transmembrane transporter 20	Tom20	CG7654	1095.1	XP_002048011	MDOA000548PA	GMOY002684 ctg10012869	Unigene1020	XP_004537692 XP_004531038	comp147136	MNCL01000003.1	gbAEGA01003790	VUAH01006149	31629449	EW987750 EX212033	FK813889	AAEL007392	CPIJ007967	AGAP012339	XP 968248	XP 006565977	Drosophilidae
		tomboy20	CG14690	1095.2	XP_002053611
					XP_002055407 XP_002057046 XP_002057047
GO:0006839 mitochondrial transport GO:0006626 GO:0070585 GO:0072655	P-P-bond-hydrolysis-driven protein transmembrane transporter 40	Tom40	CG12157	776.2	XP_002058101	MDOA006332PA	GMOY009558	Unigene2702	XP_004523968	comp157445	MNCL01000021.1 MNCL01000193.1	gi309241287	VUAH01006196	XP 031624560	LLOTMP006852	Contig4257	AAEL007001	CPIJ002542	AGAP007871	XP 966771	XP 391836 XP 391836	Drosophilidae
		tomboy40	CG8330	776.1	XP 002057312 D. willistoni: XP 002062810
GO:0019751 polyol metabolic process	Glycerol 3 phosphate dehydrogenase	Gpdh1	CG9042	598.1	XP_002051368	ALHF_11471	GMOY008210	CL1818	XP_004529383	comp159056	MNCL01000020	AEGA01000508	VUAH01006225	XP_31633500	LLOTMP002548	JP550838	XP 001653595	XP 001841997	XP 001687881	XP 008201416	XP 006558427 NP 001014994	Calyptrata Drosophilidae
		Gpdh2	CG3215	598.1	XP_002049040	XP_005190609	GMOY009911
		Gpdh3	CG43343	598.1	XP_002054373
GO:0019751 polyol metabolic process	Glycerophosphate oxidase-1	Gpo-1	CG8256	693.3	XP_002050587	MDOA009054	GMOY010870 GMOY010871	Unigene2248	XP_004530158	comp159562	MNCL01000004	AEGA01031562	VUAH01006169	XP_031636993	LLOTMP008094	PPATMP000122	XP 001664283	XP 001845276	XP 562185	XP 008194238	XP 006564634	Drosophilidae Drosophilidae
		Gpo-3	CG7311	693.1	XP_002050869
		Gpo-2	CG2137	693.2	XP_002057863
GO:0006839 mitochondrial transport	Mitochondrial anion carrier protein (MACP) gene family	Ucp4A	CG6492	447.1	XP_002059558	MDOA013911	-	Unigene15766	XP_004536134	comp158093	Pcoq MNCL01000137 369103 369417 Pcoq MNCL01000137 361411 362019 Pcoq MNCL01000137 358814 359437	AEGA01022594	VUAH01000011	XP_031634097	LLOTMP010089	PPATMP006241	AAEL007235	AEGA01022595	LLOTMP010089	PPATMP006242	-	Drosophilidae Drosophilidae
		Ucp4B	CG18340	447.3	XP_002051379	-	GMOY007874	-	-	-
		Ucp4C	CG9064	447.2	XP_002051380 XP_002051381 XP 002051833
GO:0006839 mitochondrial transport	Mitochondrial carrier (TC 2.A.29) family	MME1	CG3476	294.1	XP_002051123	MDOA011608	GMOY007568	Unigene4480	XP_004519322 Contig2199 4 2	comp158528 comp121665	MNCL01000031 MNCL01000057	GL501437	VUAH01000029	XP_031627939	-	-	CH477216		XP 316164	XP 967309	XP 006560286	Drosophilidae
		colt	CG3057	294.2	XP_002051268
GO:0006839 mitochondrial transport	Eukaryotic mitochondrial porin family	porin	CG6647	664.2	XP_002052597	MDOA014768	GMOY003090	Unigene694	XP_004524766	comp143986	MNCL01000088	GL501425	VUAH01000005	XP_031629667	LLOTMP006374	PPATMP003321	gi 78216392	gi 145648988	AGAP009833	gi 158703262	gb GL630235	Drosophilidae
		Porin2	CG17137	664.1	XP_002052598
GO:0046835 carbohydrate phosphorylation	Hexokinase	Hex-A	CG3001	3.4	XP_002055038	XP_019891905	GMOY007230	Unigene2949	XP_004521010	comp158884	MNCL01000216 MNCL01005250_1 MNCL01000057	AEGA01030422	VUAH01006190 VUAH01003649	XP_031632506	LLOTMP000608	PPATMP000132	AAEL009387	CPIJ008049	-	XP 970645 XP 008201713	XP 006557645	Brachycera/Bibionomorpha Drosophilidae+Calyptratae Drosophilidae
		Hex-C	CG8094	3.3	XP_002059924	ALHF_02218.g1275	-	Unigene8342	XP_004533719 XP_004520566	comp157604 comp160205 comp147884	MNCL01005250_2	JXPD01005490	VUAH01006180	XP_031618677
		Hex-t1	CG33102	3.1	XP_002053420	MDOA012708 MDOA002808	GMOY013302 GMOY013303 GMOY013299 GMOY013300	-	-
		Hex-t2	CG32849	3.2	XP_002053421 XP_002053418
GO:0043648: dicarboxylic acid metabolic process	Malate dehydrogenase 2	Mdh2	CG7998	1060.1	XP 002054903	XP 005187487	-	Unigene996	XP 004536932	comp152343	MNCL01000001	AHB50501	VUAH01000016 VUAH01000074	XP_31639088	-	-	EAT40089	XP 001849862 XP 001863970 XP 001841671 AAWU01013293	EAA01572	XP 973533	XP 392478	Drosophilidae Brachycera
		CG10748	CG10748	1060.2	XP 002050073	XP 005190203	-	-	XP 004531266 XP 004533385	-	MNCL01000101 MNCL01000058
		CG10749	CG10749	1060.3	XP 002055293		-	-		-
GO:0043648: dicarboxylic acid metabolic process	Succinate dehydrogenase, subunit C	SdhC	CG6666	1154.2	XP 002053422	MDOA011810	GMOY011667	Unigene1196	XP 004518508	comp158719	MNCL01000221_1 MNCL01000221_2	AEGA01015301	VUAH01006165	XP_031641004	-	-	-	XP 001859594	XP 311387	XP 972464 XP 972413	XP 006564913	Drosophilidae+Calyptratae
		CG6629	CG6629	1154.1	XP 002053434	-	GMOY011672	-
GO:0043648: dicarboxylic acid metabolic process	Malic enzyme	Menl-1	CG7964	885.2	XP 002050844	MDOA007103	-	CL2262 Contig1	XP 020713613	comp152369	MNCL01000112	AEGA01025357	VUAH01000002	XP_031623425	-	-	EAT42717 XP 021693932	XP 001850913 XP 001850913	XP 003436731	XP 969151	XP 006563718	Drosophila subgroup Drosophilidae
		Menl-2	CG7969	885.3
		Men-b	CG5889	885.4	XP 002054324
		CG7848		885.1	XP 002050845	MDOA007993 MDOA008701	-	CL1299 Contig3 CL1299 Contig4	XP 004523446	comp160968	MNCL01000048	JXPD01006196	VUAH01000508 VUAH01006225	XP 031639001	-	-	EAT42717	XP 001862425	XP 310951	XP 969226	XP 395280	Drosophilidae
		Men	CG10120	885.5	XP 002056217
