# Supplementary material for: Genomic signatures of globally enhanced gene duplicate accumulation in the megadiverse higher Diptera fueling intralocus sexual conflict resolution
Source: PeerJ. 2020 Oct 12;8:e10012. doi: 10.7717/peerj.10012 (PMC7560327; doi:10.7717/peerj.10012)
Supplement: Supplemental Information 8 [file peerj-08-10012-s008.xlsx]

## Sheet: 2020 Gene tree links
	Gene family name	Gene name	Drosophila CG#	Master list ID	Pipeline consistent (1 = yes)	iTol tree	Gap-cleaned alignment length
GO:0045454 cell redox homeostasis	Glutaredoxin	Grx1t	CG7975	933.1	1	https://itol.embl.de/tree/141217516345221584132572#	92
		Grx1	CG6852	933.2
GO:0045454 cell redox homeostasis	Thioredoxin reductase	Trxr-1	CG2151	206.1	Duplication in Tcas	https://itol.embl.de/tree/141217516485601584137276#	459
		Trxr-2	CG11401	206.2
GO:0045454 cell redox homeostasis	Thioredoxin	Trx-2	CG31884	156.3	Txl independent insect gene family	https://itol.embl.de/tree/141217516210571584218450#	75
		Trx-1 (dhd)	CG4193	156.2
		TrxT/1	CG3315	156.1
		CG13473	CG13473	156.5
GO:0006839 mitochondrial transport GO:0006626 GO:0070585 GO:0072655	Heat Shock Protein 60	Hsp60	CG12101	302.1	1	https://itol.embl.de/tree/141217516245311584129351#	523
		Hsp60B	CG2830	302.4
		Hsp60C	CG7235	302.2
		Hsp60D	CG16954	302.3
GO:0006839 mitochondrial transport GO:0006626 GO:0070585 GO:0072655	Mitochondrial inner membrane translocases	Tim13	CG11611	1052.1	1	https://itol.embl.de/tree/141217516442061584121502#	72
		CG34132	CG34132	1052.2
		CG42302	CG42302	1052.3
GO:0006839 mitochondrial transport GO:0006626 GO:0070585 GO:0072655	Mitochondrial inner membrane translocases	Tim17b1	CG1158		1	http://itol.embl.de/tree/761121123184801532956984#	142
		Tim17b2	CG15257
		CG1724	CG1724
		Tim17b	CG40451
GO:0006839 mitochondrial transport GO:0006626 GO:0070585 GO:0072655	P-P-bond-hydrolysis-driven protein transmembrane transporter 20	Tom20	CG7654	1095.1	1	https://itol.embl.de/tree/141217516242271583515665#	108
		tomboy20	CG14690	1095.2
GO:0006839 mitochondrial transport GO:0006626 GO:0070585 GO:0072655	P-P-bond-hydrolysis-driven protein transmembrane transporter 40	Tom40	CG12157	776.2	1	https://itol.embl.de/tree/141217516123911584656587#	282
		tomboy40	CG8330	776.1
GO:0019751 polyol metabolic process	Glycerol 3 phosphate dehydrogenase	Gpdh1	CG9042	598.1	1	https://itol.embl.de/tree/141217516206811584056912	348
		Gpdh2	CG3215	598.1
		Gpdh3	CG43343	598.1
GO:0019751 polyol metabolic process	Glycerophosphate oxidase-1	Gpo-1	CG8256	693.3	1	https://itol.embl.de/tree/14121751621661583536318#	710
		Gpo-3	CG7311	693.1
		Gpo-2	CG2137	693.2
GO:0006839 mitochondrial transport	Mitochondrial anion carrier protein (MACP) gene family	Ucp4A	CG6492	447.1	1	https://itol.embl.de/tree/14121751678831583538714#	485
		Ucp4B	CG18340	447.3
		Ucp4C	CG9064	447.2
GO:0006839 mitochondrial transport	Mitochondrial carrier (TC 2.A.29) family	MME1	CG3476	294.1	1	https://itol.embl.de/tree/141217516123981583540759#	354
		colt	CG3057	294.2
GO:0006839 mitochondrial transport	Eukaryotic mitochondrial porin family	porin	CG6647	664.2	1	https://itol.embl.de/tree/141217516101061584053667#	267
		Porin2	CG17137	664.1
GO:0046835 carbohydrate phosphorylation	Hexokinase	Hex-A	CG3001	3.4	1	https://itol.embl.de/tree/141217516267261583604232#	922
		Hex-C	CG8094	3.3
		Hex-t1	CG33102	3.1
		Hex-t2	CG32849	3.2
GO:0043648: dicarboxylic acid metabolic process	Malate dehydrogenase 2	Mdh2	CG7998	1060.1	1	https://itol.embl.de/tree/14121751646581584028864#	290
		CG10748	CG10748	1060.2
		CG10749	CG10749	1060.3
GO:0043648: dicarboxylic acid metabolic process	Succinate dehydrogenase, subunit C	SdhC	CG6666	1154.2	1	https://itol.embl.de/tree/141217516330791583787579#	137
		CG6629	CG6629	1154.1
GO:0043648: dicarboxylic acid metabolic process	Malic enzyme like-1	Menl-1	CG7964	885.2	2 separate insect gene families	https://itol.embl.de/tree/141217516378791583939316#	544
		Menl-2	CG7969	885.3
		Men-b	CG5889	885.4
		CG7848		885.1
		Men	CG10120	885.5
